# Supplementary material for: TEADs, Yap, Taz, Vgll4s transcription factors control the establishment of Left-Right asymmetry in zebrafish
Source: eLife journal article supplement (doi:10.7554/elife.45241), 2019-09-12
Supplement: supp [file elife-45241-supp-v1.zip]

Archive with 24 entries (24 files):
- elife_poa_e45241_Supplementary_file_1.xlsx
- elife_poa_e45241_Figure_1_figure_supplement_1.jpg
- elife_poa_e45241_Figure_2_figure_supplement_1.jpg
- elife_poa_e45241_Supplementary_file_2.xlsx
- elife_poa_e45241_Figure_1_figure_supplement_2_source_data_1.xlsx
- elife_poa_e45241_Figure_1_figure_supplement_3.jpg
- elife_poa_e45241_Figure_9_source_data_1.xlsx
- elife_poa_e45241_Supplementary_file_3.xlsx
- elife_poa_e45241_Supplementary_file_8.pdf
- elife_poa_e45241_Supplementary_file_7.pdf
- elife_poa_e45241_Figure_1_figure_supplement_2.jpg
- elife_poa_e45241_Figure_10_source_data_1.xlsx
- elife_poa_e45241_Supplementary_file_4.xlsx
- elife_poa_e45241_Figure_1_source_data_1.xlsx
- elife_poa_e45241_Figure_3_source_data_1.xlsx
- elife_poa_e45241_Supplementary_file_5.xlsx
- elife_poa_e45241_Supplementary_file_6.pdf
- elife_poa_e45241_Figure_2_source_data_1.xlsx
- elife_poa_e45241_Transparent_Reporting_File.pdf
- elife_poa_e45241_Figure_2_figure_supplement_2_source_data_1.xlsx
- elife_poa_e45241_Figure_4_figure_supplement_1.jpg
- elife_poa_e45241_Supplementary_file_9.pdf
- elife_poa_e45241_Figure_2_figure_supplement_2.jpg
- elife_poa_e45241_Figure_4_figure_supplement_2.jpg
