# Supplementary material for: TEADs, Yap, Taz, Vgll4s transcription factors control the establishment of Left-Right asymmetry in zebrafish
Source: eLife journal article supplement (doi:10.7554/elife.45241), 2019-09-12
Supplement: supp [file elife-45241-supp-v1.zip › elife_poa_e45241_Figure_1_figure_supplement_2_source_data_1.xlsx]

## Sheet: Feuil1
Figure 1-figure Supplement 2 - souce data
Expression of lft1		Left Jog	No Jog	Right Jog	sum
Number of embryos	Std MO 8ng	141	4	0	145
	DFC Vgll4l MO1 8ng	79	7	32	118
	DFC Vgll4b MO1 8ng	43	45	15	103
	DFC Yap MO1 8ng	68	7	23	98
	DFC Taz MO1 8ng	91	15	22	128
	DFC Tead1a MO1 8ng	43	86	5	134
	DFC Tead3a MO1 8ng	56	17	78	151
