# Supplementary material for: TEADs, Yap, Taz, Vgll4s transcription factors control the establishment of Left-Right asymmetry in zebrafish
Source: eLife journal article supplement (doi:10.7554/elife.45241), 2019-09-12
Supplement: supp [file elife-45241-supp-v1.zip › elife_poa_e45241_Figure_1_source_data_1.xlsx]

## Sheet: Feuil1
Numerical data for Figure 1B and D
Figure 1B		Left Jog	No Jog	Right Jog	sum
Number of embryos	WT	773	16	15	804
	Std MO 8ng	231	5	4	240
	DFC std MO 8ng	99	0	3	102
	Vgll4l MO1 8ng	260	73	153	486
	DFC Vgll4l MO1 2ng	74	51	9	134
	Vgll4l MO sp 6ng	95	132	22	249
	Vgll4l (MO sp 6ng + RNA)	63	51	8	122
	Vgll4l RNA 100ng	386	7	18	411
	Vgll4L ASO 1+2	60	20	13	93
	Vgll4b MO1 4 ng	218	84	62	364
	DFC Vgll4b MO1 8 ng	58	60	17	135
	Vgll4b MO2 4 ng	114	30	16	160
	Vgll4b (MO2 4 ng + RNA)	142	5	5	152
	Vgll4b RNA 100 ng	130	3	4	137
	Yap MO1 6ng	61	45	54	160
	Yap (MO1 6ng + RNA)	117	23	69	209
	Yap RNA 100 ng	92	6	11	109
	Yap MOsp 4 ng	112	30	16	158
	Verteporfin 2,5 µM	114	6	18	138
	Taz MOsp1 6ng	136	9	19	164
	DFC Taz MO1 8ng	147	19	44	210
	Taz MOsp2 6 ng	71	31	15	117
	Taz (MOsp2 6ng + RNA)	102	3	20	125
	Taz RNA 100 ng	103	2	3	108
	DFC (Yap + Taz MOs)	29	33	43	105
	Tead1a MO1 8ng	82	15	14	111
	Tead1a MO2 8ng	84	23	23	130
	DFC Tead1a MO1 8ng	81	30	7	118
	Tead3a MO1 8ng	86	5	15	106
	Tead3a MO2 8ng	85	6	25	116
	DFC Tead3a MO1 2ng	87	26	27	140
Figure 1D	vgll4l -/-	30	10	36	76
Number of embryos	vgll4b -/-	36	11	18	65
	yap -/-	36	7	5	48
	taz -/-	27	2	5	34
	yap +/- ; taz -/-	8	4	7	19
	tead3a -/-	33	4	15	52
