# Supplementary material for: TEADs, Yap, Taz, Vgll4s transcription factors control the establishment of Left-Right asymmetry in zebrafish
Source: eLife journal article supplement (doi:10.7554/elife.45241), 2019-09-12
Supplement: supp [file elife-45241-supp-v1.zip › elife_poa_e45241_Figure_2_figure_supplement_2_source_data_1.xlsx]

## Sheet: Feuil1
Figure 2 - figure supplement 2 - source data
G	WT	Yap Gain of function
KV area	2934.9	1819.11
(µm2)	1209.7	3815.79
	2936	3047.37
	2026.6	4235.18
	2755.7	2914.13
	1375.9	5296.95
	2251	3022.99
	2249.9	2909.42
	1165.7	2750.42
	1041.8	2231.02
	2364	2559.28
	1278.1	1467.87
	2032.4	2162.05
	3907.2	2477.01
	2274.8	1163.43
	1928	3520.78
	2742.1	2948.75
	2969	2960.11
	2407.2	3627.42
	2415	3272.85
	2895.6	1646.26
	2055.7	2185.87
	2004.4	3321.88
	2539.9	3445.15
	2800.3	4487.81
	2349.3	2319.39
	3742.7	3406.93
	2266.8	2135.46
	2912.2	4417.45
	2463.7	3026.04
		2260.39
		2899.72
		1883.66
		3820.22
		3558.73
		2519.67
Mean	2343	2932
Standart Deviation	688.73	901.03
	A vs B	Statistical test	Pvalue	Number of KV (A)	Number of KV (b)
	WT vs Yap GOF	two-tailled unpaired t-test	0.0046	29	36
H	WT 70% epiboly	Yap GOF 70 % Epiboly	WT 12-somite	YAP GOF 12-somite
Cell number	25	20	57	47
per DFC cluster	20	20	52	66
or per KV	28	21	45	84
	38	40	52	61
	28	19	55	62
	28	29	47	64
	26	25	40
	21	27	43
	28	33	42
	24	23	57
	28	28	32
	33	32	30
	37	21	41
	33	32	67
	22	30	66
	27	17	58
	31	50	56
	29	41	41
	32		35
	27		54
			45
			47
Mean	28.32	28.22	48.3	64
Standart Deviation	4.78	8.81	10.04	11.88
	A vs B	Statistical test	Pvalue	Number of DFC cluster/KV (a)	Number of DFC cluster/KV (b)
	WT vs Yap GOF - 70% epi.	two-tailled unpaired t-test	0.99	20	18
	WT vs Yap GOF - 12-som.	two-tailled unpaired t-test	0.003	22	6
