# Supplementary material for: TEADs, Yap, Taz, Vgll4s transcription factors control the establishment of Left-Right asymmetry in zebrafish
Source: eLife journal article supplement (doi:10.7554/elife.45241), 2019-09-12
Supplement: supp [file elife-45241-supp-v1.zip › elife_poa_e45241_Figure_2_source_data_1.xlsx]

## Sheet: Feuil1
Figure 2 - source data
Figure 2E	Std MO	Vgll4l	Vgll4b	Yap/Taz	Tead1a	Tead3a
KV area	2934.9	2322.16	1281.16	1473.41	605.54	1436.29
(µm2)	1209.7	1345.43	1994.18	2621.33	928.809	929.363
	2936.01	1658.45	1486.15	230.471	608.033	569.252
	2026.59	2059.83	2124.65	1469.53	336.011	423.546
	2755.68	1061.5	1237.4	393.352	1421.05	1906.37
	1375.9	2034.63	2691.14	1250.42	645.152	805.817
	2250.97	821.884	1672.3	1732.41	837.95	1179.5
	2249.86	1706.65	1034.63	259.834	716.62	2328.81
	1165.65	2054.85	2027.15	443.767	536.565	3047.65
	1041.83	1111.08	1009.97	942.105	876.177	1318.84
	2363.99	2411.08	533.795	1189.47	448.199	1150.97
	1278.12	1480.61	1288.09	0	1973.41	1183.1
	2032.41	790.305	1519.11	2965.1	436.842	2588.09
	3907.2	455.679	3420.22	0	898.338	1745.98
	2274.79	2628.81	578.67	622.161	673.961	2040.72
	1927.98	1905.82	3144.88	3376.73	1060.39	2287.53
	2742.11	1507.48	570.36	336.565		286.427
	2968.98	1074.79	2725.21	0		2442.38
	2407.2	0	1708.59	0		704.986
	2414.96	0	2401.39
	2895.57	0	1003.05
	2055.68	0	1575.35
	2004.43	0	758.172
	2539.89	0	1360.94
	2800.28	0	0
	2349.31	1132.69	0
	3742.66	1150.42	0
	2266.76	1029.92	0
	2912.19	398.061	0
	2463.71	940.166
	2395.01	1119.67
	2692.24	1924.38
	2727.42	1543.49
	2733.52	1183.93
	3393.35	791.967
	2699.45	543.767
	2414.9	1834.63
		0
		0
		0
		0
		0
		0
		0
Mean	2414.9	724.55	1151.37	839.42	812,70	1493.45
Standart Deviation	659.57	822.98	1008.54	1023.13	410,13	802.45
	A vs B	Statistical test	Pvalue	Number of KV (A)	Number of KV (b)
	Ctrl vs Vgll4l	two-tailled unpaired t-test	<0,000001	36	44
	Ctrl vs Vgll4b	two-tailled unpaired t-test	<0,000001	36	29
	Ctrl vs Yap/Taz	two-tailled unpaired t-test	<0,000001	36	19
	Ctrl vs Tead1a	two-tailled unpaired t-test	<0,000001	36	16
	Ctrl vs Tead3a	two-tailled unpaired t-test	<0,000001	36	20
Figure 2F	Std MO	Vgll4l	Vgll4b	Yap/Taz	Tead1a	Tead3a
CELL NUMBER 60% epiboly	18	18	24	20	31	19
per DFC cluster	25	21	26	20	21	19
	19	17	24	23	22	20
	20	22	19	24	23	27
	18	16	23	16	20	18
	16	25	23	18	32	25
	23	19	25	21	22	20
	18	18	18	25	16	27
	27	19	17		22	20
	22	18	25		23
	25	21	19		18
	28	21	20		21
	22	18			17
		19			16
Mean	21.61	19.42	21.92	19.4444	21.71	21.67
Standart Deviation	3.82	2.34	3.12	3.04	4.81	3.6
	A vs B	Statistical test	Pvalue	Number of DFC cluster (A)	Number of DFC cluster (B)
	Ctrl vs Vgll4l	two-tailled unpaired t-test	0.082	13	15
	Ctrl vs Vgll4b	two-tailled unpaired t-test	0.83	13	12
	Ctrl vs Yap/Taz	two-tailled unpaired t-test	0.64	13	8
	Ctrl vs Tead1a	two-tailled unpaired t-test	0.95	13	14
	Ctrl vs Tead3a	two-tailled unpaired t-test	0.97	13	9
CELL NUMBER Bud stage	Std MO	Vgll4l	Vgll4b	Yap/Taz	Tead1a	Tead3a
per DFC cluster	31	28	37	20	51	22
	46	28	19	24	30	19
	40	41	47	14	53	21
	43	27	41	20	19	47
	43	20	33	33	31	15
	45	26	30	20	36	35
	46	33	38	28	27	35
	50	38	24	14	38	43
	39	43	43	16	23	48
	42	37	46	22	33	41
	45	36	44	20	36	54
	30	33	42	21	42
	38	41	15	29	27
	39	34	21	27	36
	41	36	30	14	42
	48	30	29	26	35
	36	27	43	30	51
	52	17		34	52
	49	17		23	37
	47	19		26	50
	34	34		36	34
	42	13		21	31
	44	31		18	47
	39	32		19	45
	46	36		26	58
	50	30		19	36
	52	22		37	34
	42	33		18	38
	44	36		28
	54	36		31
	67	44		36
	39	24		30
				38
				26
				49
				54
Mean	43.84	30.6875	34.2353	26.3056	38.2857	34.5455
Standart Deviation	7.1757	7.9085	10.078	9.1708	9.691	13.3893
	A vs B	Statistical test	Pvalue	Number of DFC cluster (A)	Number of DFC cluster (B)
	Ctrl vs Vgll4l	two-tailled unpaired t-test	<0,000001	32	32
	Ctrl vs Vgll4b	two-tailled unpaired t-test	0.000357	32	17
	Ctrl vs Yap/Taz	two-tailled unpaired t-test	<0,000001	32	36
	Ctrl vs Tead1a	two-tailled unpaired t-test	0.023428	32	28
	Ctrl vs Tead3a	two-tailled unpaired t-test	0.00613	32	11
Figure 2G		Ctrl	Ctrl	vgll4l	vgll4l	vgll4b	vgll4b	YapTaz	YapTaz	tead1a	tead1a	tead3a	tead3a
Mitotic Index		number DFCs analyzed	mitotic index	number DFCs analyzed	mitotic index	number DFCs analyzed	mitotic index	number DFCs analyzed	mitotic index	number DFCs analyzed	mitotic index	number DFCs analyzed	mitotic index
(%)	experiment 1	91	7.69	91	5.49	133	6.77	122	7.38	95	2.11	112	3.57
	experiment 2	93	10.75	64	3.13	121	9.92	87	2.3	108	4.63	93	4.3
	experiment 3	127	4.72	84	0	100	6	106	5.66	82	2.44	103	4.85
	experiment 4	110	11.82	106	4.72	109	4.59	112	3.57	100	5	101	3.96
	experiment 5	94	6.38	104	1.92	95	7.37	99	3.03	99	4.04	101	6.93
	experiment 6	88	4.55	108	5.48	122	4.92	107	1.87	180	4.44	100	7
	experiment 7	115	4.35	212	5.13	109	7.34	77	1.45			175	6.85
	experiment 8	97	9.28
	experiment 9	162	6.17
Mean			7.3		3.7		6.7		3.61		3.78		5.35
Standart Deviation			2.77		2.11		1.8		2.17		1.21		1.52
	A vs B	Statistical test	Pvalue	Number of DFCs analyzed (A)	Number of DFCs analyzed (B)
	Ctrl vs Vgll4l	two-tailled unpaired t-test	0.012797	977	769
	Ctrl vs Vgll4b	two-tailled unpaired t-test	0.628039	977	789
	Ctrl vs Yap/Taz	two-tailled unpaired t-test	0.011732	977	710
	Ctrl vs Tead1a	two-tailled unpaired t-test	0.011732	977	664
	Ctrl vs Tead3a	two-tailled unpaired t-test	0.117644	977	785
Figure 2H		Ctrl	Ctrl	vgll4l	vgll4l	vgll4b	vgll4b	YapTaz	YapTaz	tead1a	tead1a	tead3a	tead3a
Apoptotic Index		number DFCs analyzed	apoptotic index	number DFCs analyzed	apoptotic index	number DFCs analyzed	apoptotic index	number DFCs analyzed	apoptotic index	number DFCs analyzed	apoptotic index	number DFCs analyzed	apoptotic index
(%)	experiment 1	99	0	88	4.54	99	8.08	112	4.46	90	4.44	100	5
	experiment 2	103	2.91	93	6.45	83	4.82	108	2.78	104	2.88	103	11.65
	experiment 3	95	0	100	6	81	4.94	79	5.06	99	3.03	92	17.39
	experiment 4	114	0.88	98	6.12	110	6.36	101	3.96	100	3	88	10.23
	experiment 5					93	5.38	113	3.54	87	7.24	96	4.81
Mean			0.95		5.78		5.92		3.93		4.12		5.35
Standart Deviation			1.37		0.85		1.35		0.87		1.86		1.52
	A vs B	Statistical test	Pvalue	Number of DFCs analyzed (A)	Number of DFCs analyzed (B)
	Ctrl vs Vgll4l	two-tailled unpaired t-test	0.000973	411	379
	Ctrl vs Vgll4b	two-tailled unpaired t-test	0.000966	411	466
	Ctrl vs Yap/Taz	two-tailled unpaired t-test	0.004978	411	513
	Ctrl vs Tead1a	two-tailled unpaired t-test	0.025259	411	480
	Ctrl vs Tead3a	two-tailled unpaired t-test	0.013779	411	479
