# Supplementary material for: TEADs, Yap, Taz, Vgll4s transcription factors control the establishment of Left-Right asymmetry in zebrafish
Source: eLife journal article supplement (doi:10.7554/elife.45241), 2019-09-12
Supplement: supp [file elife-45241-supp-v1.zip › elife_poa_e45241_Figure_3_source_data_1.xlsx]

## Sheet: Feuil1
Figure 3 - source data
Figure 3D	Ctrl	vgll4l	vgll4b	YapTaz	tead1a	tead3a
Cilia Length	5.76271	4.72693	2.64727	3.6616	4.02542	2.36045
(µm)	5.72505	4.38795	3.33352	4.9246	3.48832	3.14727
	4.33145	3.65348	3.03936	3.8782	3.49736	2.95066
	4.38795	2.42938	1.8629	2.3206	4.76422	2.16384
	5.36723	3.46516	3.33352	3.9306	3.73277	2.55725
	5.02825	3.70998	2.54915	4.2508	3.89812	2.45876
	4.89642	2.90019	3.33352	2.3444	3.83277	1.96704
	4.33145	4.08663	2.64727	2.6212	3.06497	1.77043
	4.27495	2.90019	2.64727	2.0486	2.80734	0.885122
	4.33145	3.08851	3.43164	4.024	3.82467	2.16384
	3.78531	3.65348	2.15706	2.806	3.37815	1.96704
	3.72881	3.48399	3.7258	2.698	3.183	2.16384
	4.78343	4.87759	1.56874	2.9354	4.403	2.16384
	3.59699	3.78531	3.13748	2.5126	4.7696	2.45876
	4.23729	3.16384	3.03936	1.9272	4.348	1.86874
	5.16008	3.40866	2.54915	2.8454	4.0804	1.37702
	3.87947	3.84181	1.8629	2.7048	3.8186	1.86874
	4.46328	3.54049	2.05895	2.0756	2.6572	1.86874
	4.5951	2.86252	1.76478	2.5052	5.4848	2.36045
	3.78531	1.76836	2.54915	4.0652	3.9688	3.14727
	4.61394	4.23729	2.25499	3.7862	4.3958	2.65556
	4.50094	2.44821	1.56874	2.9088	3.1928	3.14727
	4.35028	1.47269	1.37269	3.5378	1.648	2.45876
	5.55556	3.29567	2.35311	2.3838	3.543	3.04896
	5.4049	3.258	2.45122	2.8906	5.3302	1.18023
	5.44256	3.16384	2.15706	3.2074	4.9132	0.983616
	5.00942	3.48399	1.27458	2.3524	4.4492	1.37702
	6.0452	3.70998	1.66685	1.7768	2.5126	1.37702
	4.21846	4.19962	3.62768	1.3626	3.4312	1.18023
	3.91714	2.95669	1.37269	3.0894	3.636	1.47533
	3.65348	2.95669	2.54915	3.4902	4.348	1.57363
	6.19586	3.70998	3.03936	2.4528	2.1972	2.65556
	6.10169	4.83992	2.15706	3.1074	2.5856	2.55725
	6.0452	3.33333	2.64727	2.5856	1.745	2.75386
	4.42561	3.03202	2.15706	4.16	2.8648	0.885122
	5.32957	3.18267	3.43164	3.19	5.0106	0.885122
	4.67043	3.65348	4.21601	3.5534	4.4366	3.63898
	4.55744	3.08851	3.43164	2.4146	4.244	3.14727
	4.61394	2.7307	4.01996	0.8176	3.3656	2.16384
	6.44068	3.12618	3.52976	3.4742	4.536	2.36045
	4.63277	3.22034	3.7258	2.6212	4.0652	2.16384
	5.78154	4.0113	6.56911	3.2304	4.3988	3.24557
	5.10358	4.7081	1.96102		4.8332	2.65556
	4.0113	4.0678	2.35311		3.9682	2.85217
	3.87947	4.08663	2.74539		3.6564	2.55725
	4.61394	3.72881	2.35311		3.543	2.65556
	3.89831	2.69303			3.707	2.65556
	3.67232	2.44821			2.9354	2.36045
	4.46328	1.74576			3.9022	1.67194
	3.78531	2.86252			3.19	1.77043
	3.78531	2.46704			3.2818	2.26215
	4.44444	3.22034			3.4356	2.26215
	4.40678	2.12806			4.0516	1.67194
	4.33145	3.54049			3.9728	2.36045
	3.89831	4.29379			2.8906	3.34407
	4.44444	2.74953			3.1784	2.95066
	5.00942	2.93785			3.6208	2.06535
	4.29379	2.84369			2.7914	2.45876
	6.06403	3.20151			2.7794	2.55725
	5.63089	3.12618			3.4902	2.16384
	3.65348	5.064			3.1372	2.55725
	4.51977	5.286			3.293	1.57363
	4.16196	3.83767			4.8792	3.14727
	4.03013	3.48			2.7592	2.75386
	4.40678	3.71933			2.1546	2.75386
	4.80226	5.747			3.1074	2.85217
	4.85876	4.25333			4.5154	2.85217
	4.44444	4.11067			2.8648	3.44237
	4.36911	5.682			3.543	2.75386
	4.53861	4.93633			3.9022	1.86874
	4.0113	5.59133			4.6612	1.96704
	4.44444	1.75067			3.1608	2.75386
	4.44444	4.904			5.0254	3.73748
	4.25612	3.80433			3.707	3.73748
	4.82109	4.29067			3.7418	4.8194
	4.7646	5.46833			3.1074	2.85217
	2.56121	5.80967			4.209	2.55725
	7.00565	4.709			4.088	3.34407
	4.48211	2.07333			3.1074	2.65556
	4.7646	3.928			4.1084	3.54068
	4.7081	2.768			3.707	1.77043
	4.6516	3.682			3.1074	2.85217
	5.08475	4.70467			3.4094	1.96704
	5.06591	3.262			3.047	1.86874
	3.80414	5.48167			3.8782	2.45876
	5.4049	3.818			2.7254	1.08192
	4.53861	3.20267			5.5586	3.04896
	5.19774	3.603			3.2704	3.14727
	4.99058	3.71933			2.739	3.04896
	4.7081	4.08733			3.9728	2.06535
	3.97363	4.67733			3.1784	1.77043
	5.51789	3.38367			3.685	2.65556
	4.82109	4.96			3.3742	1.37702
	5.44256	5.58367			3.19	2.55725
	4.72693	5.79133				1.47533
	4.72693	5.104				2.06535
	3.74765	2.91767				3.14727
	5.57439	4.006				1.86874
	4.46328	4.25333				2.85217
	4.0678	2.51				2.75386
	7.703	3.20267				1.37702
	5.951	3.07733				2.26215
	8.304	1.89633				2.55725
	6.09567	4.18				2.45876
	6.76767	3.85433				3.63898
	6.717	3.03567				3.44237
	5.81333	5.21933				2.65556
	7.937	3.35867				4.3275
	6.71067	2.787				2.55725
	7.01467	3.13233				2.85217
	6.95967	2.51				2.36045
	5.57433	5.22333				3.63898
	5.38	4.37667				2.16384
	4.66833	4.095				1.86874
	5.09567	4.709				1.67194
	7.057	4.54367				3.34407
	5.54367	3.982				3.14727
	6.44533	3.29133				2.95066
	4.29067	4.17733				2.55725
	6.736	4.54367				3.54068
	7.29433	3.54967				3.34407
	5.747	3.818				3.93409
	5.32433	2.936				3.54068
	6.602	4.095				3.44237
	6.83	3.06367				2.95066
	7.123	5.57433				3.04896
	7.75233	3.20267				3.54068
	6.58267	2.90667				2.95066
	7.38133	3.067				2.55725
	5.87167	2.59733				2.55725
	5.747	3.896				2.75386
	5.26	4.67062				2.55725
	6.07133	4.29812				2.95066
	6.81133	5.32655				2.75386
	5.90067	5.61469				2.65556
	5.38	5.29699				2.36045
	6.008	3.56874				2.65556
	6.42567	3.41525				3.54068
	7.63633	4.51977				2.75386
	6.86733	2.6693				2.06535
	6.155	2.48569				3.34407
	4.78533	5.22505				4.13089
	5.665	3.83277				3.14727
	7.52967	4.73766				2.45876
	5.77667	2.25989				2.16384
	7.02667	3.36893				1.37702
	5.505	2.07062				2.26215
	5.38	3.36893				2.45876
	5.665	3.89812				2.45876
	3.91433	3.97024				2.36045
	6.93533	1.12298				2.75386
	3.96833	3.7096				3.54068
	3.415	3.73277				3.73748
	5.19467	3.01318				2.36045
	6.42567	5.07815				4.13089
	6.07133	3.20094				3.34407
	5.73233	4.38531				2.55725
	5.21933	4.93333				2.16384
	4.095	4.01168				1.67194
	6.155	3.5951				2.36045
	4.55767	2.8629				2.55725
	6.42567	3.06497				1.86874
	5.81333	4.47062				2.26215
	6.134	3.19605				3.68983
	6.399	3.77476				4.42787
	5.635	3.93032				4.87062
	5.26	5.64275				3.98512
	6.015	4.04878				5.46102
	4.74967	4.67062				3.24708
	4.82967	4.08757				4.28023
	6.134	4.69096				7.82241
	6.524	3.76648				4.87062
	5.951	3.73277				3.54218
	8.34467	3.51544				3.24708
	6.524	5.08437				2.06629
	8.29867	3.77476				2.36158
	6.18933	4.6096				4.72298
	6.95967	4.04878				4.72298
	6.42567	3.41525				2.50904
	5.665	2.14539				4.72298
	4.45367	2.80734				3.39473
	6.155	2.71601				5.60866
	6.09233	3.03409				3.39473
	5.42733	2.71601				5.31337
	5.284	3.65612				4.28023
	7.01467	4.62994				3.98512
	5.951	5.50697				2.36158
	7.29433	4.11827				3.24708
	6.83	4.47062				3.98512
	6.134	5.32072				4.13258
	6.725	4.7774				3.09944
	5.19467	4.44237				3.09944
	6.45867	4.67062				3.54218
	6.015	4.84953				4.13258
	7.59167	3.06497				4.42787
	7.17667	4.7177				3.98512
	4.78533	4.38531				4.13258
	5.79367	4.7774				4.13258
	6.436	3.30264				3.83748
	7.356	4.52674				3.83748
	4.79933	4.76422				3.83748
	5.052	3.49736				6.05141
	6.37967	3.56874				3.54218
	4.60067	6.04727				4.28023
	4.11133	1.35217				2.21394
	6.769	3.92222				3.54218
	5.52233	5.48399				2.80433
	5.429	4.08757				4.42787
	7.91133	2.58531				3.83748
	7.57067	3.52429				4.87062
	6.045	3.79981				2.95179
	5.88067	3.89812				5.46102
	6.981	3.5951				4.72298
	7.33633	4.84953				5.75612
	6.394	5.07815				3.39473
	6.00267	3.73277				4.13258
	4.23067	4.27608				5.16573
	5.38	4.11827				4.87062
	3.88433	4.87552				3.68983
	4.293	3.03409				2.50904
	4.02433	3.84105				1.47589
		3.37815				2.95179
		4.52674				2.36158
		4.26874
		5.51281
		4.38531
		3.82467
		4.08757
		4.67062
		4.26121
		5.15217
		3.37815
		3.93032
		5.57533
		4.1791
		3.03409
		3.89812
		4.29812
		2.80734
		4.98418
		4.77081
		4.7774
		4.47062
		4.04878
		1.75763
		4.27608
		4.20923
Mean	5.42	3.84	2.7	2.94	3.65	2.92
Standart Deviation	1.15	0.96	0.95	0.83	0.78	1.05
	A vs B	Statistical test	Pvalue	Number of cilia (A)	Number of cilia (B)
	Ctrl vs Vgll4l	two-tailled unpaired t-test	<0,000001	221	247
	Ctrl vs Vgll4b	two-tailled unpaired t-test	<0,000001	221	46
	Ctrl vs Yap/Taz	two-tailled unpaired t-test	<0,000001	221	42
	Ctrl vs Tead1a	two-tailled unpaired t-test	<0,000001	221	94
	Ctrl vs Tead3a	two-tailled unpaired t-test	<0,000001	221	223
