# Supplementary material for: TEADs, Yap, Taz, Vgll4s transcription factors control the establishment of Left-Right asymmetry in zebrafish
Source: eLife journal article supplement (doi:10.7554/elife.45241), 2019-09-12
Supplement: supp [file elife-45241-supp-v1.zip › elife_poa_e45241_Figure_9_source_data_1.xlsx]

## Sheet: Feuil1
Figure 9 - source data
Figure 9A		Left Jog	No Jog	Right Jog	sum
number of	Std MO 8ng	175	3	6	183
embryos	Dnmt3bb.1 MO	112	49	51	212
	Dnmt3bb,2 MO	71	29	79	179
	Mbd3a MO	92	10	52	154
	Mbd3b MO	116	27	23	166
	Dnmt3bb.1 -/-	38	3	13	54
	dnmt3bb,2 -/-	19	12	17	48
	dnmt3ba -/-	25	5	10	40
Figure 9B	Std MO	Dnmt3bb.1	Mbd3b
KV area	2934.9	1730.75	1351.52
(µm2)	1209.7	1381.99	1258.45
	2936.01	0	716.898
	2026.59	0	2535.18
	2755.68	0	1467.04
	1375.9	715.235	1179.5
	2250.97	0	1922.44
	2249.86	1366.76	2210.25
	1165.65	583.934	2788.92
	1041.83	0	3775.35
	2363.99	0	514.958
	1278.12	0
	2032.41	915.512
	3907.2	276.177
	2274.79	0
	1927.98	0
	2742.11	1567.59
	2968.98	1591.97
	2407.2	0
	2414.96	744.598
	2895.57	1422.71
	2055.68
	2004.43
	2539.89
	2800.28
	2349.31
	3742.66
	2266.76
	2912.19
	2463.71
	2395.01
	2692.24
Mean	2355.7	396.68	1792.77
Standart Deviation	669.1	611.9	970.46
	A VS B	Statistical test	Pvalue	Number of KV analyzed (A)	Number of KV analyzed (B)
	Ctrl vs Dnmt3bb.1	two-tailled unpaired t-test	<0,000001	32	21
	Ctrl vs Mbd3b	two-tailled unpaired t-test	0.038632	32	11
Figure 9C	Std MO	Dnmt3bb.1	Mbd3b
Cell number per DFC	46	43	29
cluster at Bud stage	40	26	26
	43	32	33
	43	35	21
	45	40	27
	46	40	35
	50	26	34
	39	44	36
	42	25	38
	45	41
	30	49
	38	43
	39	33
	41	26
	48	27
	36
	52
	49
	47
	34
	42
	44
	39
	46
	50
	52
	42
	44
	54
	67
	39
Mean	44.25	35.33	31
Standart Deviation	6.89	8.06	5.57
	A vs B	Statistical test	Pvalue	Number of DFC clusters analyzed (A)	Number of DFC clusters analyzed (B)
	Ctrl vs Dnmt3bb.1	two-tailled unpaired t-test	0.00033	31	15
	Ctrl vs Mbd3b	two-tailled unpaired t-test	6e-06	31	9
Figure 9D		Ctrl	Ctrl	Dnmt3bb.1	Dnmt3bb.1	Mbd3b	Mbd3b
mitotic index		number DFCs analyzed	mitotic index	number DFCs analyzed	mitotic index	number DFCs analyzed	mitotic index
(%)	experiment 1	91	7.69	69	2.9	58	3.45
	experiment 2	93	10.75	90	5.56	66	3.03
	experiment 3	127	4.72	61	1.64	92	2.17
	experiment 4	110	11.82	84	5.95
	experiment 5	94	6.38	65	4.62
	experiment 6	88	4.55
	experiment 7	115	4.35
	experiment 8	97	9.28
	experiment 9	162	6.17
Mean			7.3		4.13		2.88
Standart Deviation			2.77		1.82		0.65
	A VS B	Statistical test	Pvalue	Number of DFCs analyzed (A)	Number of DFCs analyzed (B)
	Ctrl vsDnmt3bb.1	two-tailled unpaired t-test	0.042065	977	369
	Ctrl vs Mbd3b	two-tailled unpaired t-test	0.02411	977	216
Figure 9E		Ctrl	Ctrl	Dnmt3bb.1	Dnmt3bb.1	Mbd3b	Mbd3b
apoptotic index		number DFCs analyzed	apototic index	number DFCs analyzed	apototic index	number DFCs analyzed	apototic index
(%)	experiment 1	99	0	91	12.77	102	0.0967742
	experiment 2	103	2.91	85	9.78	78	0.0571429
	experiment 3	95	0	58	6.67	84	0.0505051
	experiment 4	114	0.88				0.0655738
Mean			0.95		9.74		6.75
Standart Deviation			1.37		3.05		2.05
	A VS B	Statistical test	Pvalue	Number of DFCs analyzed (A)	Number of DFCs analyzed (B)
	Ctrl vs Dnmt3bb.1	two-tailled unpaired t-test	0.003392	411	234
	Ctrl vs Mbd3b	two-tailled unpaired t-test	0.003306	411	264
Figure 9F	Ctrl	Dnmt3bb.1	Mbd3b
length of cilia	5.76271	3.58	3.54
(µm)	5.72505	1.798	2.26
	4.33145	3.9	2.48
	4.38795	1.89	3.04
	5.36723	1.586	2.7
	5.02825	4.4	2.4
	4.89642	2.12	2.88
	4.33145	2.1	4.16
	4.27495	2.44	2.74
	4.33145	2.06	3.18
	3.78531	3.82	4.36
	3.72881	2.32	3.2
	4.78343	2.72	3.64
	3.59699	2.92	3.58
	4.23729	2.44	2.78
	5.16008	2.32	3.56
	3.87947	2.2	5.38
	4.46328	2.4	3.76
	4.5951	2.94	5.28
	3.78531	2.7	3.24
	4.61394	2.82	3.9
	4.50094	2.42	4.3
	4.35028	2.6	5.14
	5.55556	2.94	2.9
	5.4049	3.94	4.12
	5.44256	3.14	3.1
	5.00942	2.5	3.24
	6.0452	2.2
	4.21846	3
	3.91714	1.526
	3.65348	2.36
	6.19586	2.56
	6.10169	2.2
	6.0452	1.92
	4.42561	2.44
	5.32957	2.12
	4.67043	2.18
	4.55744	2.56
	4.61394
	6.44068
	4.63277
	5.78154
	5.10358
	4.0113
	3.87947
	4.61394
	3.89831
	3.67232
	4.46328
	3.78531
	3.78531
	4.44444
	4.40678
	4.33145
	3.89831
	4.44444
	5.00942
	4.29379
	6.06403
	5.63089
	3.65348
	4.51977
	4.16196
	4.03013
	4.40678
	4.80226
	4.85876
	4.44444
	4.36911
	4.53861
	4.0113
	4.44444
	4.44444
	4.25612
	4.82109
	4.7646
	2.56121
	7.00565
	4.48211
	4.7646
	4.7081
	4.6516
	5.08475
	5.06591
	3.80414
	5.4049
	4.53861
	5.19774
	4.99058
	4.7081
	3.97363
	5.51789
	4.82109
	5.44256
	4.72693
	4.72693
	3.74765
	5.57439
	4.46328
	4.0678
	7.703
	5.951
	8.304
	6.09567
	6.76767
	6.717
	5.81333
	7.937
	6.71067
	7.01467
	6.95967
	5.57433
	5.38
	4.66833
	5.09567
	7.057
	5.54367
	6.44533
	4.29067
	6.736
	7.29433
	5.747
	5.32433
	6.602
	6.83
	7.123
	7.75233
	6.58267
	7.38133
	5.87167
	5.747
	5.26
	6.07133
	6.81133
	5.90067
	5.38
	6.008
	6.42567
	7.63633
	6.86733
	6.155
	4.78533
	5.665
	7.52967
	5.77667
	7.02667
	5.505
	5.38
	5.665
	3.91433
	6.93533
	3.96833
	3.415
	5.19467
	6.42567
	6.07133
	5.73233
	5.21933
	4.095
	6.155
	4.55767
	6.42567
	5.81333
	6.134
	6.399
	5.635
	5.26
	6.015
	4.74967
	4.82967
	6.134
	6.524
	5.951
	8.34467
	6.524
	8.29867
	6.18933
	6.95967
	6.42567
	5.665
	4.45367
	6.155
	6.09233
	5.42733
	5.284
	7.01467
	5.951
	7.29433
	6.83
	6.134
	6.725
	5.19467
	6.45867
	6.015
	7.59167
	7.17667
	4.78533
	5.79367
	6.436
	7.356
	4.79933
	5.052
	6.37967
	4.60067
	4.11133
	6.769
	5.52233
	5.429
	7.91133
	7.57067
	6.045
	5.88067
	6.981
	7.33633
	6.394
	6.00267
	4.23067
	5.38
	3.88433
	4.293
	4.02433
Mean	5.42	2.51	3.51
Standart Deviation	1.15	0.77	0.85
	A vs B	Statistical test	Pvalue	Number of cilia mesured (A)	Number of cilia mesured (B)
	Ctrl vs Dnmt3bb.1	two-tailled unpaired t-test	<0,000001	221	38
	Ctrl vs Mbd3b	two-tailled unpaired t-test	<0,000001	221	27
Figure 9G		Left Jog	No Jog	Right Jog	sum
Number of embryos	Std MO 8ng	175	3	6	183
	Vgll4l MO1	71	20	41	132
	Vgll4l MO1 + Dnmt3bb.1 RNA	109	6	29	144
	Dnmt3bb.1 RNA	239	0	6	245
