# Supplementary material for: TEADs, Yap, Taz, Vgll4s transcription factors control the establishment of Left-Right asymmetry in zebrafish
Source: eLife journal article supplement (doi:10.7554/elife.45241), 2019-09-12
Supplement: supp [file elife-45241-supp-v1.zip › elife_poa_e45241_Figure_10_source_data_1.xlsx]

## Sheet: Feuil1
Figure 10 - source data
G	Ctrl	Vgll4l MO	dnmt3bb.1 MO	WT	heterozygous vgll4l +/-	homozygous vgll4l -/-
mean of nuclear anti-5meC	0.792347	0.724446	0.352704	1.1226	1.1241	0.6024
fluorescence intensity	1.1644	0.535287	0.335777	0.8573	1.0465	0.6358
per DFC cluster at 75%	1.04325	0.891232	0.412469	1.1716	0.9919	0.6584
epiboly expressed in	1.13993	0.88	0.299976	0.8489	1.0163	0.748
relative unit	1.0462	0.79			0.8347	0.745
	0.813872	0.764193			0.9403	0.7655
					0.9203
Mean	1	0.764	0.35	1	0.982	0.693
Standart Deviation	0.16	0.13	0.047	0.17	0.094	0.069
	A vs B	Statistical test	Pvalue	Number of DFC clusters mesured (A)	Number of DFC clusters mesured (B)
	Ctrl vs Vgll4l MO	two-tailled unpaired t-test	0.032029	6	6
	Ctrl vs Dnmt3bb.1 MO	two-tailled unpaired t-test	5.5e-05	6	4
	Ctrl vs vgll4l +/-	two-tailled unpaired t-test	0.822551	4	7
	Ctrl vs vgll4l -/-	two-tailled unpaired t-test	0.00374	4	6
