# Supplementary material for: TEADs, Yap, Taz, Vgll4s transcription factors control the establishment of Left-Right asymmetry in zebrafish
Source: eLife journal article supplement (doi:10.7554/elife.45241), 2019-09-12
Supplement: supp [file elife-45241-supp-v1.zip › elife_poa_e45241_Supplementary_file_1.xlsx]

## Sheet: genome uva 1
RNA sequencing analysis of DFCs lacking activity of Vgll4l or of Yap/Taz
ensgene	gene symbol	vgll4l vs WT log2 fold change	vgll4l vs WT.padj	Yap/Taz vs WT log2 fold change	Yap/Taz vs WT.padj	WT-1	WT-2	WT-3	WT-4	Vgll4l-1	Vgll4l -2	Vgll4l-3	Vgll4l-4	Yap/Taz-1	Yap/Taz-2	Yap/Taz-3	Yap/Taz-4
ENSDARG00000035285	ncor1	-3.99133	0	-0.417599	1.72825e-07	1730.62	1791.42	1644.8	1533.46	101.626	139.731	88.92	90.3101	1253.11	1324.62	1237.05	1196.84
ENSDARG00000006174	lrrc23	-3.96711	0	-1.4171	4.63724e-126	1531.49	1437.41	1524.18	1486.09	87.8724	122.736	92.8285	80.1733	550.277	590.049	559.344	540.767
ENSDARG00000053405	sord	-3.93884	0	-1.70898	8.13305e-196	3275.06	3180	3016.79	2927.19	178.801	241.696	196.406	193.522	926.678	944.557	956.297	961.121
ENSDARG00000075826	msh4	-3.93106	0	-3.9906	0	1682.05	1814.31	1657.2	1585.56	93.9853	138.786	93.8057	116.113	105.259	103.798	115.477	98.5204
ENSDARG00000032324	epb41l5	-3.86622	0	-1.53148	1.72024e-90	2034.97	1997.42	1854.49	1823.57	122.257	156.725	142.663	107.819	703.502	705.025	625.743	629.801
ENSDARG00000020953	dnajb6b	-3.781	0	-0.351512	4.13202e-05	2321.52	2105.76	2171.27	2143.29	132.191	215.261	141.686	148.367	1750.09	1687.11	1711.23	1700.39
ENSDARG00000025567	nf2b	-3.67743	0	-1.88674	2.6582e-138	2962.61	2861.09	2627.85	2550.63	189.499	261.523	209.108	200.894	731.482	780.078	743.386	717.374
ENSDARG00000042961	zgc:100920	-3.67416	0	-1.72011	9.55455e-132	2682.54	2633.73	2427.18	2377.75	174.217	236.976	182.726	199.972	754.133	812.814	727.508	775.027
ENSDARG00000101679	cfap52	-3.61887	0	-1.9856	7.35662e-219	2543.31	2645.93	2695.49	2710.49	196.376	268.132	194.451	205.502	681.518	671.49	682.76	640.018
ENSDARG00000069342	KLF14	-3.59861	0	-1.00528	1.7992e-30	4231.84	3991.79	3480.13	3484.92	278.135	385.203	304.868	285.675	1861.35	1889.91	1914.04	1894.51
ENSDARG00000042308	arhgef18b	-3.42323	0	-6.02936	0	2525.5	2360.59	2259.21	2088.82	212.422	199.211	203.246	244.206	37.3069	34.333	39.6954	29.1912
ENSDARG00000074708	NA	-3.32077	0	-1.40842	1.18616e-201	2007.45	1881.45	1945.8	1913.57	190.263	212.428	178.817	193.522	723.488	762.512	721.734	711.536
ENSDARG00000062267	NA	-3.24569	0	-1.272	2.63649e-83	1675.57	1701.39	1518.54	1548.85	162.755	206.764	152.434	156.66	654.204	688.257	666.16	656.073
ENSDARG00000057708	PHTF1	-3.20757	0	-2.30971	0	5789.23	5552.8	5316.58	5288.36	550.158	591.023	616.577	620.191	1085.23	1142.57	1131.68	1064.75
ENSDARG00000099284	NA	-3.20133	0	-1.76501	7.31236e-168	2034.97	1866.19	1801.5	1785.68	210.894	223.758	193.474	183.385	544.282	554.917	581.717	518.874
ENSDARG00000075007	chst2a	-3.194	0	-1.02405	1.85626e-43	2185.53	2139.33	2073.19	1963.3	202.489	286.07	226.697	199.972	1035.27	1002.05	1050.12	1020.23
ENSDARG00000057323	e2f8	-3.17785	0	-4.49791	0	3511.42	3648.46	3472.23	3487.29	367.536	463.566	384.017	345.574	165.216	156.495	131.356	170.769
ENSDARG00000099162	NA	-3.15968	0	-1.56226	3.076e-156	5258.23	5189.63	4583.8	4433.41	537.168	555.146	517.885	564.899	1646.83	1671.94	1623.18	1642.01
ENSDARG00000001710	NA	-3.12903	0	-2.678	0	1814.8	1858.56	1703.42	1621.09	209.366	190.713	213.994	183.385	278.47	267.478	287.25	257.613
ENSDARG00000068213	fzd10	-3.12041	0	-0.680487	3.16062e-26	1411.69	1347.38	1231.06	1277.69	137.539	164.278	139.731	164.033	862.057	772.892	836.489	806.408
ENSDARG00000063321	rabl2	-3.08286	0	-1.59121	1.48684e-108	1950.79	2055.4	1790.23	1811.73	220.063	253.026	229.628	194.443	614.898	685.064	597.595	625.422
ENSDARG00000045628	rab34a	-3.06686	0	-1.69225	2.3696e-178	4623.61	4559.43	4020.13	4001.2	515.773	487.169	519.84	527.116	1313.07	1356.55	1388.62	1259.6
ENSDARG00000099970	NA	-3.03151	0	-3.35443	0	95365.2	90282.2	78209.8	75747	10200.1	10484.5	10799.4	10030	8302.13	8267.07	8438.51	8177.92
ENSDARG00000033614	rasgef1ba	-3.00356	0	-3.07348	0	3284.77	3248.67	3085.55	3071.66	369.828	456.013	396.72	361.241	363.743	380.857	378.91	383.135
ENSDARG00000020235	sept9a	-2.89072	0	-1.98843	0	3985.76	4094.02	3846.51	3631.75	505.075	492.834	556.971	542.782	944.665	1015.62	1010.43	947.985
ENSDARG00000018312	NA	-2.85379	0	-1.32706	1.65082e-102	2119.16	2201.89	1948.06	1979.88	307.936	291.735	295.097	242.363	809.427	794.45	829.994	848.735
ENSDARG00000099999	tcf3b	-2.84669	0	-1.27247	7.06846e-82	3496.85	3566.06	3441.8	3386.64	424.08	577.805	452.417	479.197	1488.95	1397.27	1436.97	1423.8
ENSDARG00000011973	slc35d1a	-2.84431	0	-1.63289	5.27473e-238	7657.45	7541.06	6937.7	6708.15	994.105	985.667	1060.2	974.059	2283.72	2390.54	2374.5	2245.53
ENSDARG00000012039	ttc26	-2.83271	0	-0.921372	5.52079e-81	1976.69	1953.17	1881.55	1780.94	275.079	258.69	264.806	263.558	989.966	1049.15	990.219	974.257
ENSDARG00000068409	vgll4l	-2.70909	0	-2.11218	0	7265.68	7057.35	6759.58	6693.94	1033.07	1107.46	1090.49	1016.45	1574.22	1676.73	1615.24	1555.89
ENSDARG00000076752	tmem67	-2.70511	0	-1.62365	2.79791e-216	1589.77	1597.63	1552.36	1458.86	238.402	239.808	226.697	243.284	502.977	503.817	513.874	487.493
ENSDARG00000076895	flrt3	-2.69679	0	-1.02249	4.25634e-83	15476.8	15234.7	13771.7	13447.1	2140.27	2361.26	2310.94	2120.44	6995.05	7296.17	7184.86	7029.98
ENSDARG00000104279	appa	-2.57769	0	-1.60893	4.59023e-147	2969.08	2980.11	2694.36	2626.42	443.947	539.096	455.348	448.786	924.013	915.015	928.871	921.713
ENSDARG00000037879	lfng	-2.5504	0	-2.76668	0	5522.11	5473.45	5012.19	4823	903.176	905.417	853.045	889.278	757.464	722.59	754.212	822.463
ENSDARG00000031548	ephb3a	-2.47423	0	-0.855726	1.12148e-63	3464.47	3433.3	3256.91	3285.98	550.158	681.659	567.72	621.113	1880.67	1829.23	1840.42	1870.43
ENSDARG00000043716	cldn5a	-2.40885	0	-1.64072	4.73244e-262	1915.17	1983.69	1860.13	1880.41	353.782	382.371	365.451	336.359	626.89	617.196	615.639	586.744
ENSDARG00000101919	foxj1a	-2.3899	0	-2.11419	0	23811	23143.5	21689.1	21540.7	4337.84	4156.99	4387.37	4316.46	5123.04	5193.87	5204.42	5301.13
ENSDARG00000100892	cfap53	-2.36556	0	-1.66316	1.46057e-219	1762.99	1698.34	1698.91	1685.03	318.633	350.271	319.526	340.045	554.941	528.569	502.327	572.878
ENSDARG00000074518	tmem17	-2.34691	0	-2.25822	0	2585.4	2560.48	2547.81	2426.3	486.737	491.89	543.291	468.138	514.303	564.499	521.813	515.225
ENSDARG00000030463	tppp3	-2.32307	0	-0.428338	1.82768e-15	6320.23	6387.47	5631.11	5447.04	1184.37	1169.77	1220.45	1174.03	4380.23	4568.69	4260.39	4451.66
ENSDARG00000077037	txlna	-2.26804	0	-0.819996	8.47022e-78	3043.55	3244.09	3023.55	2883.38	613.579	669.385	642.96	605.446	1767.42	1704.67	1693.19	1733.96
ENSDARG00000009844	dusp23a	-2.259	0	-1.21184	3.83084e-146	1635.1	1631.2	1626.76	1589.11	352.254	313.45	325.388	359.397	702.17	679.474	728.229	685.994
ENSDARG00000005464	dnase1l3	-2.19627	0	-2.62959	0	2663.11	2536.07	2545.55	2583.79	584.543	509.828	588.24	567.664	437.024	405.609	408.501	415.245
ENSDARG00000014646	aoc2	-2.18801	0	-1.21967	1.59627e-155	4392.11	4231.36	3966.01	3853.19	895.535	888.422	946.851	873.612	1776.74	1768.55	1779.8	1725.2
ENSDARG00000045914	si:ch211-51e12.7	-2.18267	0	-0.923643	6.20073e-82	2438.08	2388.05	2223.13	2145.66	498.198	530.599	481.731	510.529	1209.81	1201.66	1214.68	1210.71
ENSDARG00000038612	NA	-2.17147	0	-0.549752	1.23449e-31	1518.54	1522.86	1577.16	1494.38	305.643	373.874	334.183	348.339	1031.94	1057.94	1049.4	1039.21
ENSDARG00000095283	si:dkeyp-2e4.3	-2.16124	0	0.055435	0.151012	3519.51	3556.9	3597.37	3383.08	766.4	735.474	835.457	807.262	3601.45	3731.12	3599.29	3675.17
ENSDARG00000078310	cecr2	-2.1313	0	-0.771898	6.68722e-50	3108.31	3120.49	2814.99	2738.91	650.256	709.038	692.794	634.935	1741.43	1741.4	1707.62	1698.93
ENSDARG00000103554	notch1a	-2.1036	0	-2.75388	0	3700.83	3910.91	3658.25	3699.25	934.504	838.384	857.931	844.123	564.267	572.483	531.196	550.255
ENSDARG00000018693	cdh2	-2.1005	0	-1.77866	0	18330.9	18405.6	16883.2	16760.3	4060.47	4004.98	4196.83	4142.29	5182.33	5091.67	5228.96	4999
ENSDARG00000034457	NA	-2.07523	0	-0.786744	5.3034e-81	2370.09	2259.88	2395.62	2453.54	537.932	574.973	562.834	578.722	1357.71	1428.41	1382.12	1334.04
ENSDARG00000100822	mapk15	-2.05443	0	-1.64794	2.02916e-248	1677.19	1571.69	1591.82	1600.96	379.762	417.304	384.017	369.534	512.97	523.778	516.04	501.359
ENSDARG00000102300	ca9	-1.89198	0	-1.17076	2.35793e-182	4498.96	4509.07	4141.88	4155.14	1133.17	1167.88	1222.41	1136.25	1931.3	1952.19	1901.77	1891.59
ENSDARG00000074023	rbms1a	-1.77812	0	-1.47482	0	2886.52	2833.62	2737.2	2799.3	789.324	842.16	835.457	815.556	997.96	1024.4	975.062	1049.42
ENSDARG00000089302	hnrnpa0a	-1.69626	0	-0.248142	1.80066e-12	4992.72	5090.44	4989.65	4845.5	1473.96	1650.33	1529.23	1495.65	4220.35	4278.05	4180.28	4086.77
ENSDARG00000053455	ccdc103	-1.67375	0	0.19862	3.88749e-08	1958.88	1911.97	1909.73	1870.94	592.948	572.14	589.217	641.386	2168.47	2198.91	2185.41	2220.72
ENSDARG00000079688	tnrc6a	-1.62501	0	-0.358243	2.88159e-22	3352.77	3361.59	3517.33	3436.37	1091.91	1199.04	1090.49	1055.15	2622.14	2652.43	2688.46	2708.95
ENSDARG00000022129	rbm4.3	-1.62088	0	-1.47676	0	12593.5	12744.4	12311.8	12161.1	4071.17	4139.99	4087.39	3889.79	4479.5	4472.08	4562.8	4374.3
ENSDARG00000031720	clstn1	-1.50997	0	-1.14311	9.2984e-267	7636.41	7480.02	6964.76	7159.3	2523.08	2595.4	2590.4	2549.88	3293.67	3264.83	3361.11	3305.18
ENSDARG00000068995	h2afx1	-1.35853	0	0.717212	2.25878e-107	6483.74	6410.36	6173.36	6249.88	2319.83	2576.52	2486.83	2492.74	10309.4	10371.8	10258	10659.2
ENSDARG00000100591	sox32	-1.08835	0	-1.09594	0	27558.7	27027	27873.7	27686.3	12878.3	12497.4	13412.3	13021.2	12804.9	12984.3	12654.9	13091.5
ENSDARG00000080337	NA	-0.656462	0	-0.5247	0	635954	623074	636069	633432	398381	405729	398084	401999	436759	438223	438737	443880
ENSDARG00000063908	mt-co2	0.803127	0	0.997318	0	75791	72926.4	72706.1	71456.8	128470	128838	126227	127448	146376	145921	148301	144014
ENSDARG00000058454	dynll1	1.02565	0	0.447533	5.10489e-130	15792.5	16023.6	16554	16040.3	32352.3	32684.7	33170.1	33003.7	21925.8	22139.2	21959.5	21860.6
ENSDARG00000013968	psap	1.04047	0	1.24403	0	3019.27	3057.93	2833.03	2922.45	6025.76	6128.32	6108.12	6022.21	6949.75	6998.35	7011.64	7001.51
ENSDARG00000013307	rpl19	1.09799	0	0.36265	1.23533e-36	4087.75	4008.57	4335.78	4163.43	8867.47	9000.35	8751.29	8956.37	5416.17	5328.01	5215.97	5407.67
ENSDARG00000063911	mt-atp6	1.16438	0	1.51865	0	11287.1	10922.5	11043.5	10763.8	24809.8	24130	24792.1	24878.6	31569	31427.5	31746.2	31318.5
ENSDARG00000007960	hnrnpaba	1.18625	0	0.587799	1.13477e-137	16414.1	16202.1	16074.9	16258.2	36379.9	35695.5	37743.1	37970.8	24205.5	24551.3	24458.8	24390.7
ENSDARG00000019444	ssr4	1.43423	0	1.11244	1.88382e-206	1578.44	1597.63	1592.94	1635.3	4189.6	4280.67	4403	4451.92	3344.3	3534.7	3465.77	3515.35
ENSDARG00000099776	glula	1.45307	0	2.73348	0	1771.09	1741.07	1685.39	1694.5	4684.75	4988.76	4569.12	4599.37	11404.6	11464.8	11490.7	11409.4
ENSDARG00000014690	rps4x	1.48125	0	0.441429	3.14636e-30	4330.59	4510.6	4617.62	4622.88	12683.4	11849.7	12829.9	13159.5	6125.67	6151.2	5996.88	6299.47
ENSDARG00000043453	rps5	1.51999	0	0.118177	0.000395505	5907.41	6112.81	6481.13	6410.93	17790	17639.1	17994.1	18110.9	6815.84	6741.25	6566.33	6946.78
ENSDARG00000092693	tpt1	1.52953	0	0.360216	1.96146e-29	10963.3	10595.9	10618.5	10596.9	30770.6	29084.7	31596.9	32017.7	13682.3	13788.3	13842.1	13584.1
ENSDARG00000037962	psmb7	1.53416	0	1.0721	8.88244e-172	1299.99	1355.01	1433.99	1340.44	3977.95	3770.84	4034.62	3977.33	2883.29	2883.18	2860.23	2815.49
ENSDARG00000088091	pfn1	1.54658	0	0.63904	1.73724e-55	8664.42	8146.85	7946.68	7782.16	23645.3	22356	24285.9	24724.7	12539.1	12695.2	12512	12901.8
ENSDARG00000035625	snrnp27	1.57253	0	-0.138917	0.000871946	1225.52	1118.49	1226.56	1179.4	3458.35	3556.52	3585.14	3547.9	1068.58	1065.92	1105.7	1077.89
ENSDARG00000033738	zgc:153867	1.58712	0	1.89354	0	691.275	718.705	740.668	714.036	2181.53	2162.05	2098.9	2181.27	2654.12	2653.22	2639.38	2722.08
ENSDARG00000023299	snu13b	1.58888	0	1.36609	0	2258.38	2169.85	2408.02	2476.03	7159.69	7012.02	6851.72	7063.54	5992.43	6017.06	5986.06	6076.15
ENSDARG00000019365	KRT23	1.63737	0	-2.34293	0	1471.59	1503.02	1507.27	1512.15	4705.38	4626.22	4746.96	4582.78	312.446	277.059	292.302	297.75
ENSDARG00000008637	mtp	1.65907	0	2.11774	0	1257.89	1179.53	1169.06	1078.75	3637.15	3739.68	3768.84	3607.8	5149.69	5121.21	5131.53	4869.1
ENSDARG00000070472	ARF5	1.65945	0	1.48413	1.15189e-251	1780.8	1693.76	1707.93	1711.08	5506.16	5001.03	5657.65	5600.15	4789.28	4835.37	4886.86	4764.01
ENSDARG00000032866	erh	1.66793	0	0.668448	2.71957e-94	3841.68	3744.59	3758.58	3540.57	12017.9	11317.2	12055	11865.6	5819.22	5954.78	5944.2	5920.71
ENSDARG00000103791	nme2b.1	1.66984	0	-0.316936	7.26859e-15	1159.14	1144.43	1207.39	1231.5	3799.91	3751.96	3765.91	3812.38	930.675	942.96	953.41	991.042
ENSDARG00000053912	fbl	1.70446	0	0.242242	7.22141e-09	1238.47	1355.01	1402.42	1353.47	4281.3	4289.16	4395.19	4523.8	1572.89	1619.24	1587.09	1568.3
ENSDARG00000012688	eif1b	1.70729	0	0.912822	6.54062e-205	2049.54	2107.29	2118.29	2168.16	6795.21	6889.29	6935.76	6996.27	3897.24	4045.71	4052.53	3927.68
ENSDARG00000099439	serp1	1.73475	0	1.01625	1.07521e-153	2238.95	2143.91	2397.87	2351.7	7517.29	7465.2	7873.81	7610.01	4679.36	4651.72	4719.42	4461.88
ENSDARG00000035400	NA	1.77682	0	0.918274	8.47177e-199	3237.82	3108.28	3240	3188.89	10720.4	10651.6	11234.2	11192	6132.33	6090.52	5897.29	6030.91
ENSDARG00000076283	snrpd3l	1.80083	0	0.826055	9.7506e-188	2651.78	2572.69	2625.6	2666.68	8943.12	9445.98	9096.22	9180.3	4630.72	4679.67	4650.85	4691.76
ENSDARG00000101637	ccnd1	1.81159	0	2.81323	0	926.018	781.267	833.111	851.396	3006.76	2859.76	3097.54	2925.86	5917.81	6002.69	5892.23	5996.61
ENSDARG00000005513	naca	1.82747	0	0.664368	1.88827e-69	2996.61	3091.5	3316.66	3301.38	11518.9	10886.7	11141.4	11634.3	5054.42	5081.29	5083.89	4957.4
ENSDARG00000007385	cct7	1.85496	0	0.968721	6.42938e-117	1178.57	1173.43	1069.85	1158.09	4213.29	3960.61	4119.63	4228.91	2185.79	2250.01	2220.05	2286.4
ENSDARG00000011125	snrpb	1.89446	0	2.09191	0	3946.91	4126.07	3904.01	3899.37	14442.4	13576.5	15494.5	15502	16513	16907	16719	17531.5
ENSDARG00000040295	apoeb	1.91083	0	2.61622	0	10053.4	9878.76	10307.4	10096	38333	35643.6	38665.5	39073	61976.8	62004.6	60790.2	62621.7
ENSDARG00000075758	ywhabb	1.91114	0	1.94566	0	1112.19	990.317	1025.89	1030.2	3828.95	3635.83	4064.91	4097.13	3987.84	4008.18	3994.07	4013.06
ENSDARG00000015111	ddx39ab	1.96347	0	1.63748	9.04737e-223	2294	2436.88	2470.02	2421.56	9280.09	8550.95	9852.53	9876.06	7521.34	7407.95	7224.55	7807.19
ENSDARG00000035770	ube2c	1.97792	0	1.50133	2.20461e-254	919.542	1051.35	1110.44	1032.57	4018.44	4134.33	3989.67	4135.84	2907.94	2947.85	2860.95	2981.88
ENSDARG00000074656	ctss2.1	1.98417	0	3.31244	0	1610.82	1576.27	1558	1539.38	6112.86	6382.29	6171.63	6164.13	15728.9	15508.1	15613.3	15484.5
ENSDARG00000040440	snrpd2	2.02262	0	0.0837585	0.0419018	3420.76	3314.28	3276.08	3308.48	13604.2	12610.7	13852	14028.5	3537.5	3600.97	3470.82	3500.03
ENSDARG00000036995	lsm6	2.02644	0	1.12824	7.02574e-105	482.436	517.284	568.184	521.021	2197.57	2146	2105.74	2105.7	1129.2	1142.57	1184.36	1136.27
ENSDARG00000037012	slc3a2b	2.05825	0	3.36767	0	1565.49	1605.26	1458.79	1554.77	6317.64	6432.33	6476.5	6463.62	16139.9	15834.7	15903.4	15775.7
ENSDARG00000075831	NA	2.10874	0	3.15925	0	1243.32	1266.51	1286.3	1149.8	5233.38	5567.51	5495.45	5029.72	10990.9	11309.1	11108.9	10759.2
ENSDARG00000014165	ssr3	2.11152	0	0.849573	1.18287e-101	1389.03	1298.55	1400.17	1403.2	5892.8	5670.42	6084.67	6119.89	2500.23	2486.35	2454.62	2468.12
ENSDARG00000033539	paics	2.12555	0	2.02911	0	535.86	602.736	657.244	590.885	2701.12	2619	2566.95	2584.9	2373.65	2462.4	2456.78	2507.53
ENSDARG00000076509	polr2d	2.15952	0	0.620926	1.00255e-25	440.344	451.67	419.374	440.5	2000.43	1889.2	1966.99	1952.73	684.849	670.692	631.517	701.319
ENSDARG00000007795	cst3	2.18249	0	2.69836	0	3611.79	3390.58	3065.26	2992.32	14825.2	14638.7	15813.1	13939.1	21011.1	21271.3	21622.4	20768.8
ENSDARG00000021242	mvp	2.1878	0	2.85821	0	433.868	477.611	493.779	491.418	2222.79	2282.9	2059.82	2114.92	3438.9	3517.94	3464.32	3400.78
ENSDARG00000015709	hsd17b12a	2.20035	0	0.127553	0.0383611	581.189	544.751	511.816	500.891	2507.04	2433.96	2353.94	2478	562.269	584.46	609.865	567.769
ENSDARG00000054696	psmb4	2.21032	0	0.793456	4.28498e-54	700.989	721.757	670.773	736.534	3316.23	3164.71	3234.34	3371.89	1181.83	1191.28	1291.9	1236.98
ENSDARG00000013804	capns1b	2.22127	0	1.55871	9.4594e-169	532.622	619.521	602.004	629.962	2855.47	2649.22	2770.2	2879.79	1732.77	1741.4	1859.91	1714.25
ENSDARG00000018574	sf3b4	2.27445	0	0.554801	1.06171e-19	950.301	846.882	848.894	867.974	4214.06	3877.52	4392.25	4492.47	1261.77	1336.59	1242.83	1313.61
ENSDARG00000026726	anxa1a	2.28027	0	3.38473	0	558.525	668.35	689.937	673.775	3134.37	3372.42	2999.83	3143.35	6900.45	6710.91	6646.45	6943.13
ENSDARG00000042539	ywhaqa	2.2831	0	1.41455	1.10657e-156	712.321	579.847	626.806	622.857	3074.01	2939.06	3098.52	3232.73	1674.81	1682.32	1703.29	1700.39
ENSDARG00000041108	ctsh	2.28488	0	2.98152	0	419.298	418.1	530.981	494.97	2358.04	2286.67	2296.28	2242.09	3697.38	3751.88	3693.83	3745.96
ENSDARG00000041065	hspb1	2.29062	0	1.17125	4.88254e-201	46370.5	45850.6	48881.8	50179.1	234625	219422	238893	243140	107537	107274	106808	109232
ENSDARG00000060682	agr1	2.2925	0	-1.02375	1.44009e-51	459.771	491.344	470.104	428.658	2200.63	2287.62	2314.85	2243.93	219.178	221.967	243.224	223.313
ENSDARG00000101334	ctsc	2.34119	0	2.7438	0	2452.65	2475.03	2546.68	2530.5	12800.3	12456.8	13167	12335.6	16686.9	16830.4	17038	16544.9
ENSDARG00000058371	krt5	2.36221	0	-1.26024	1.76414e-275	5227.47	5037.04	5558.96	5540.58	27459.7	27167.2	27453.8	27909.5	2213.1	2309.89	2194.07	2214.88
ENSDARG00000095796	NA	2.36828	0	-0.630436	3.7399e-17	331.877	309.76	317.912	317.349	1649.71	1689.04	1619.12	1630.19	190.532	218.773	218.685	197.771
ENSDARG00000020956	pck2	2.40296	0	2.95209	0	558.525	672.928	632.443	685.616	3499.61	3412.07	3403.39	3216.15	4998.46	5072.5	4972.74	4760.36
ENSDARG00000093584	NA	2.41939	0	-0.307474	3.03121e-12	1559.01	1475.56	1639.17	1521.62	8404.42	8515.07	8103.44	8167.54	1239.12	1269.52	1308.5	1196.84
ENSDARG00000077044	arl6ip5a	2.44136	0	3.59741	0	718.797	633.254	689.937	685.616	3653.2	3637.72	3798.15	3738.65	8139.57	8416.38	8352.62	8129.76
ENSDARG00000016855	sf3b5	2.45426	0	1.39658	1.03661e-159	508.338	517.284	569.311	628.778	3030.45	3074.07	3049.66	3130.44	1506.93	1449.97	1457.18	1485.1
ENSDARG00000010250	nqo1	2.508	0	-2.74268	3.70613e-218	505.1	564.588	529.854	522.205	3073.24	3089.18	2881.59	3020.78	76.6125	80.6427	77.2255	82.4652
ENSDARG00000099667	snrpg	2.5372	0	0.85639	1.29906e-50	1397.12	1284.82	1572.65	1506.22	8346.35	8912.55	8208	8075.38	2658.79	2673.18	2584.53	2544.02
ENSDARG00000045928	psma4	2.54835	0	1.64107	2.11161e-155	448.439	387.582	428.393	406.16	2406.18	2280.06	2514.19	2571.07	1317.07	1334.2	1271.69	1286.6
ENSDARG00000037965	srrm2	2.55394	0	2.1158	4.31101e-221	367.493	361.641	400.209	408.528	2166.25	2123.34	2345.14	2444.82	1702.8	1624.03	1682.36	1688.71
ENSDARG00000056085	mob4	2.57666	0	1.44608	1.44913e-106	411.204	456.248	448.685	457.078	2704.18	2399.97	2671.51	2828.18	1182.5	1232.79	1208.18	1220.92
ENSDARG00000035699	srp19	2.58153	0	2.74876	0	335.115	251.776	349.478	325.638	1873.59	1840.1	1933.76	1961.94	2089.85	2214.88	2113.24	2127.31
ENSDARG00000098591	tubb2b	2.61542	0	0.894611	1.71371e-54	1421.4	1306.18	1394.53	1347.55	8418.94	7502.97	8636.96	8967.43	2552.19	2502.32	2510.91	2603.86
ENSDARG00000005675	sec61a1l	2.6284	0	3.24627	0	315.688	305.183	325.804	380.108	2040.93	2019.49	2166.32	2039.35	3187.08	3200.16	3172.02	3122
ENSDARG00000069476	spint2	2.64502	0	0.477166	1.53413e-10	375.588	352.486	315.658	336.295	2222.03	2044.98	2271.86	2045.8	494.317	457.507	493.666	463.411
ENSDARG00000043665	glrx5	2.65455	0	2.17906	0	516.433	428.781	483.633	502.075	3117.56	2981.55	3028.16	3045.66	2227.76	2269.97	2168.09	2092.28
ENSDARG00000011701	ctsll	2.65885	0	3.63581	0	1669.1	1498.45	1647.06	1644.77	10377.4	10190.9	10036.2	10248.4	20109.8	20143.9	20173.2	20001.8
ENSDARG00000041607	eif4ebp3l	2.67138	0	1.63166	6.54712e-151	412.822	402.841	461.086	441.684	2800.46	2528.37	2869.87	2805.14	1357.04	1315.83	1317.16	1361.77
ENSDARG00000016363	her8a	2.67647	0	2.17529	4.13042e-244	495.387	479.137	561.42	449.973	3178.69	2932.45	3292.97	3323.04	2213.77	2256.4	2209.23	2312.67
ENSDARG00000013938	psmb3	2.68651	0	1.50817	1.17335e-128	547.192	628.676	656.117	624.041	4010.04	3655.66	3967.2	4240.89	1723.45	1748.59	1722.06	1820.07
ENSDARG00000104181	si:dkey-152p16.6	2.69684	0	-0.490015	3.68834e-17	887.164	941.488	1013.49	992.308	6214.49	6644.76	6004.54	6083.95	656.202	701.032	716.682	666.29
ENSDARG00000101043	ppl	2.69848	0	0.348903	2.64774e-09	420.917	415.048	466.722	442.868	2906.67	2785.17	2914.82	2782.1	563.601	540.545	563.674	565.58
ENSDARG00000011648	snrpd1	2.70413	0	1.4495	0	1557.39	1593.05	1533.19	1564.25	10138.9	10358	9806.6	10385.7	4147.73	4290.83	4365.05	4251.7
ENSDARG00000024669	oser1	2.738	0	0.316398	9.14247e-06	429.012	357.064	368.643	357.61	2542.19	2390.53	2573.79	2539.74	465.004	493.437	431.597	486.034
ENSDARG00000059304	NA	2.7405	0	0.816741	1.89799e-46	620.043	552.38	640.334	596.806	3938.98	3840.7	4153.83	4211.4	1039.26	1044.36	1106.42	1064.02
ENSDARG00000015662	pla2g12b	2.74246	0	3.58392	0	676.705	567.64	544.509	510.364	3981	3455.5	3943.75	3930.33	6890.46	6961.62	6980.61	6608.16
ENSDARG00000093494	NA	2.79057	0	-0.429187	2.58829e-11	773.84	764.482	768.852	754.296	5337.29	4846.2	5563.85	5434.27	578.257	589.25	585.326	520.334
ENSDARG00000018461	FTL	2.80691	0	0.860277	2.83841e-47	741.462	726.334	848.894	743.639	5422.11	5000.09	5459.29	5605.68	1372.36	1434	1431.92	1336.23
ENSDARG00000099761	vox	2.83562	0	2.90232	0	807.837	695.816	727.14	614.568	4897.93	5037.86	5245.3	5046.31	5278.27	5284.09	5351.66	5266.83
ENSDARG00000013800	snrpd3	2.8384	0	0.721742	5.42146e-51	692.894	686.661	654.99	602.727	4556.38	4812.21	4713.73	4699.81	1088.56	1082.69	1066	1091.75
ENSDARG00000087093	si:ch211-157c3.4	2.85068	0	-0.777459	1.59691e-21	590.903	463.877	483.633	518.653	3848.05	3379.03	3847.01	3731.28	299.122	306.602	313.232	278.046
ENSDARG00000013430	bhmt	2.85099	0	2.92688	0	595.76	529.492	535.491	511.548	3871.74	4154.15	3658.42	3936.78	4089.11	4051.3	4069.13	4255.35
ENSDARG00000041490	afp4	2.87813	0	3.94673	0	673.467	589.002	624.551	641.803	4603.75	5400.4	4179.24	4414.14	9726.45	9632.41	9720.31	9933.77
ENSDARG00000013623	vdac2	2.89907	0	2.25889	3.56742e-197	289.785	306.708	320.167	299.587	2338.17	2012.88	2306.06	2439.29	1445.64	1432.41	1455.02	1504.08
ENSDARG00000031317	ppdpfb	2.97546	0	2.75879	0	686.419	701.92	660.626	583.78	5140.92	4984.98	5283.41	5200.2	4476.17	4530.36	4321.74	4407.14
ENSDARG00000103994	ppiab	2.99353	0	2.16006	1.49056e-197	241.218	216.68	226.597	241.564	1840.74	1902.41	1779.38	1859.65	1013.28	1037.18	982.28	1110.73
ENSDARG00000087693	atox1	2.99553	0	1.64512	2.69884e-132	280.072	254.827	330.313	271.168	2268.64	2229.08	2336.35	2300.14	916.018	871.101	930.315	862.601
ENSDARG00000042725	cebpb	3.05775	0	0.504184	1.57208e-10	296.261	274.664	310.021	356.426	2630.06	2416.02	2571.84	2754.46	455.678	428.764	433.04	448.085
ENSDARG00000075621	birc5a	3.09235	0	-0.0650697	0.478413	223.41	204.472	244.635	233.275	1892.7	1925.07	1971.87	1993.27	218.512	207.595	218.685	226.232
ENSDARG00000016691	cd9b	3.20587	0	1.57697	4.07304e-131	1858.51	1895.18	2178.04	2172.89	18470.8	16873.4	19650.3	19955.8	6027.07	6078.54	6004.82	6118.48
ENSDARG00000056531	nutf2	3.22649	0	2.44593	6.02815e-198	221.791	207.524	267.182	251.037	2238.84	2023.26	2393.02	2301.99	1305.74	1353.36	1299.12	1255.95
ENSDARG00000095904	prpf31	3.27341	0	2.34499	7.95821e-177	317.307	276.19	333.695	352.873	3097.69	2793.67	3167.9	3388.47	1545.57	1628.82	1621.01	1744.91
ENSDARG00000089372	clk4a	3.27725	0	1.41517	8.29972e-63	343.209	328.071	367.516	329.191	3362.08	2845.6	3545.07	3539.6	884.707	911.821	943.306	915.875
ENSDARG00000056167	hspe1	3.30058	0	1.47485	8.27734e-259	835.358	784.319	860.167	764.954	7861.14	8208.23	8083.9	7841.32	2249.74	2230.05	2225.1	2318.51
ENSDARG00000058358	krt8	3.30531	0	0.946967	3.96904e-51	5706.66	5209.47	5635.62	5482.56	55421.5	46818.3	57163.8	58520	10542.5	10584.2	10540.2	10819
ENSDARG00000103846	hspa5	3.3059	0	2.55834	2.31551e-285	229.885	201.42	271.691	254.59	2367.97	2518.93	2394.98	2301.99	1448.97	1418.03	1370.57	1469.05
ENSDARG00000018404	krt18	3.3297	0	1.2794	7.33077e-215	8131.79	7893.55	8123.68	7854.39	79730.1	74011.9	84090.9	83982	19397.6	19614.5	19098.5	19577.8
ENSDARG00000004906	stip1	3.33506	0	0.137959	0.119074	605.473	567.64	488.142	452.341	5222.68	4862.25	5617.59	5508.92	592.914	566.894	562.231	588.933
ENSDARG00000053973	fetub	3.33976	0	4.5466	0	681.562	726.334	866.931	792.189	7762.57	7921.22	7594.35	8007.19	18099.9	18043.2	17595.1	18483.2
ENSDARG00000014587	slc38a5b	3.43998	0	1.40132	1.88451e-80	314.069	253.302	305.512	318.533	3208.49	3014.59	3434.66	3327.65	809.427	751.334	798.237	799.11
ENSDARG00000045066	entpd1	3.55259	0	3.98193	0	139.226	135.806	118.372	116.046	1494.6	1353.88	1531.18	1542.64	1991.92	1976.94	2054.78	1952.16
ENSDARG00000014731	NA	3.56692	0	2.51787	3.02572e-224	289.785	242.62	254.781	252.222	3101.51	2753.07	3345.74	3088.97	1466.3	1525.02	1488.21	1459.56
ENSDARG00000039515	atf4a	3.58415	0	1.65933	6.15049e-83	461.39	401.315	498.288	537.599	5711.71	5001.98	5989.88	6185.32	1460.97	1507.46	1488.21	1569.76
ENSDARG00000015123	zgc:101000	3.60394	0	2.64886	0	598.997	642.409	537.745	545.888	7114.61	6295.43	7358.86	7392.53	3572.81	3637.7	3660.63	3654.01
ENSDARG00000095863	afp4	3.60839	0	4.5459	0	1471.59	1326.02	1430.61	1424.52	16734.7	19281.9	16213.7	16758.1	33025.3	32400	32672.2	34039.2
ENSDARG00000012076	apoa1a	3.63452	0	3.79601	0	339.971	340.279	284.092	313.797	3917.58	3543.3	4169.47	4160.72	4456.18	4225.36	4402.58	4575.72
ENSDARG00000002369	si:ch211-202a12.4	3.6373	0	1.60735	1.22821e-181	592.522	567.64	651.608	641.803	7544.8	8081.72	7523.02	7533.52	1770.75	1877.14	1896.72	1968.95
ENSDARG00000094041	krt17	3.66684	0	-1.51174	3.95357e-64	312.45	268.561	358.497	339.848	4154.46	3893.57	4181.19	4167.17	115.252	115.774	110.425	110.927
ENSDARG00000014898	ncbp2	3.66745	0	2.55567	0	271.977	289.923	326.931	306.692	3831.24	3756.68	3814.76	3921.12	1703.46	1762.96	1807.94	1817.88
ENSDARG00000009640	psmb1	3.70211	0	1.643	3.11775e-101	260.645	238.042	277.328	243.933	3413.27	3004.21	3402.41	3494.45	797.436	797.644	784.524	815.165
ENSDARG00000056160	hspd1	3.71237	0	1.93412	4.59497e-135	359.398	445.567	390.063	351.689	5192.88	4512.92	5402.62	5141.23	1498.94	1453.96	1524.3	1424.53
ENSDARG00000017624	krt4	3.72507	0	0.259015	0.000265958	11075	11049.1	11416.7	11286	150186	123270	158794	160916	13371.2	13623	13415.6	13238.2
ENSDARG00000019834	NA	3.79033	0	1.28191	3.7857e-38	181.318	149.539	207.432	158.675	2400.83	2207.37	2446.76	2648.48	399.051	441.539	441.701	423.273
ENSDARG00000004754	hspa4a	3.80033	0	0.0931254	0.237133	433.868	346.382	386.681	371.82	5395.37	4996.31	5358.65	5649.91	409.044	424.771	409.945	394.811
ENSDARG00000036832	cyt1l	3.9084	0	-0.705815	4.82964e-11	315.688	289.923	413.737	395.502	5556.59	5863.02	4923.82	5085.93	216.513	221.169	206.416	229.881
ENSDARG00000098589	cyb5a	3.97418	0	3.04778	6.32738e-210	132.751	102.236	122.881	129.071	2008.08	1707.92	2039.3	1926	1017.95	974.1	1048.68	1000.53
ENSDARG00000051861	pkp3a	3.97801	0	2.75179	1.47132e-168	85.8023	88.5029	131.9	125.519	1808.64	1681.49	1739.31	1746.3	722.156	731.373	809.785	718.834
ENSDARG00000015495	klf3	3.9912	0	3.86891	0	92.278	102.236	102.589	125.519	1678.75	1588.96	1727.59	1800.67	1620.85	1584.91	1553.89	1482.91
ENSDARG00000037995	gdf3	4.04406	0	0.615033	7.49904e-09	199.126	151.065	182.631	155.122	2887.56	2492.49	3010.58	2945.22	257.818	240.331	280.754	272.208
ENSDARG00000102765	lonp1	4.04617	0	0.648851	1.60942e-08	90.6591	126.651	120.626	89.9945	1757.45	1629.56	1841.91	1859.65	174.543	174.06	156.616	167.12
ENSDARG00000100083	sgut1	4.10563	0	2.30821	1.43358e-103	147.321	100.71	109.353	113.677	1943.89	1821.22	2157.53	2136.11	618.895	574.878	564.396	558.282
ENSDARG00000022767	apobb.1	4.14712	0	5.76578	0	124.656	111.392	119.499	113.677	2044.75	2189.43	2073.5	2010.78	6363.5	6432.25	6499.93	6242.54
ENSDARG00000062592	myl10	4.14802	0	3.3472	0	293.023	303.657	331.441	342.216	5686.49	5606.22	5572.64	5844.36	3177.09	3276.81	3258.63	3326.34
ENSDARG00000103322	NA	4.3424	0	0.450627	3.58944e-05	134.37	148.014	160.084	112.493	2827.96	2604.84	2901.14	2938.77	206.521	196.417	187.651	167.85
ENSDARG00000102829	NA	4.38022	0	3.09557	1.92339e-252	106.848	132.754	137.537	99.4676	2587.27	2329.16	2555.23	2487.21	1061.92	1020.41	996.714	1008.56
ENSDARG00000100317	ahsa1b	4.45592	0	0.153573	0.132509	356.161	321.968	305.512	322.086	7187.2	6216.12	7600.21	7596.19	345.755	356.904	409.945	335.699
ENSDARG00000013576	gadd45bb	4.51658	0	3.90841	0	101.991	73.2438	98.0793	104.204	2263.29	2019.49	2233.75	2201.54	1475.62	1438.79	1385.73	1420.15
ENSDARG00000019949	serpinh1b	4.69372	0	3.5139	0	569.857	566.114	578.33	573.123	15062.9	14583	14874.1	14741.7	6448.1	6694.14	6616.13	6406.01
ENSDARG00000068404	tbcb	4.72894	0	2.32914	2.22166e-102	127.894	108.34	139.791	145.649	3397.22	3007.04	3782.52	3791.18	658.867	657.916	651.725	678.696
ENSDARG00000056008	atp5g1	4.78167	0	2.75251	2.08536e-101	48.5674	39.6737	51.858	56.8387	1381.51	1338.77	1419.79	1363.87	337.095	335.346	335.606	340.078
ENSDARG00000100095	anxa1b	4.80088	0	1.24833	1.00624e-23	56.6619	73.2438	104.843	103.02	2511.62	2172.43	2555.23	2455.88	204.522	209.192	207.859	204.339
ENSDARG00000059279	tfap2a	4.89073	0	3.09849	2.16834e-134	56.6619	56.4588	67.6409	56.8387	1766.62	1615.4	1901.52	1837.53	516.301	506.212	539.135	493.332
ENSDARG00000015422	ppil1	4.92503	0	3.632	3.83169e-217	55.043	67.1402	74.405	65.1276	1973.69	2171.49	1902.5	2011.7	793.439	851.14	823.498	821.733
ENSDARG00000051762	NA	4.97521	0	1.06946	1.74607e-20	140.845	146.488	144.301	142.097	4620.56	3703.81	4788	4967.98	305.117	303.408	293.746	302.859
ENSDARG00000024746	hsp90aa1.2	5.31306	0	0.585523	4.83113e-36	940.588	866.718	870.313	809.951	34731	33715.7	34531.2	35224.6	1295.75	1360.55	1325.1	1236.25
ENSDARG00000041022	pdcd4b	5.4445	0	0.536442	3.09879e-08	176.461	163.273	165.72	144.465	7045.84	6484.26	7166.36	7499.43	229.837	220.37	229.511	258.342
ENSDARG00000036834	krt92	5.52784	0	0.379796	7.01522e-05	662.135	718.705	797.036	774.427	34182.4	27969.7	36873.4	37689.7	971.979	981.286	909.384	988.123
ENSDARG00000102937	hspbp1	5.68248	0	1.48068	2.34653e-61	148.94	143.436	160.084	163.411	8118.65	7353.8	8164.02	8211.77	399.051	464.693	435.927	432.76
ENSDARG00000010478	hsp90aa1.1	5.78983	0	-0.120534	0.561284	48.5674	42.7256	42.8393	27.2352	2198.34	2095.96	2232.77	2272.5	36.6407	45.5112	31.0345	33.5699
ENSDARG00000103511	zfand2a	5.98235	0	2.55706	2.03465e-87	50.1863	50.3551	51.858	44.9973	3124.44	3024.03	3163.01	3182.97	293.126	283.447	298.798	286.804
ENSDARG00000041051	mid1ip1a	6.03081	0	0.238167	0.235546	48.5674	25.9405	43.9666	26.051	2338.93	2551.03	2348.07	2201.54	39.3055	41.519	51.2431	37.9486
ENSDARG00000008447	fkbp4	6.39409	0	1.42587	6.65184e-39	79.3267	74.7697	87.9332	82.8897	6931.22	6571.12	6958.23	7115.15	203.19	225.161	223.737	229.881
ENSDARG00000079497	zgc:110340	6.8667	0	5.26309	0	63.1376	51.881	47.3486	44.9973	5736.16	5724.23	6214.63	6225.87	1917.31	1952.19	1934.25	2059.44
ENSDARG00000021924	hsp70.3	6.96802	0	1.39197	1.78753e-40	333.496	227.361	225.47	216.697	30763.8	35143.2	29700.2	29090.9	664.863	664.304	625.021	656.073
ENSDARG00000055723	hsp70l	7.17852	0	1.42628	3.91153e-12	32.3782	9.15548	22.547	24.8669	3211.55	3518.76	3198.19	3080.68	66.6195	64.6738	50.5214	59.1122
ENSDARG00000037403	clnd23a	7.79824	0	-0.771855	3.59907e-05	66.3754	59.5106	51.858	28.4193	11478.4	9903.88	11662.2	11840.8	28.6464	24.7517	29.5911	34.2997
ENSDARG00000039486	bag3	7.80606	0	-1.66184	8.35655e-13	55.043	41.1996	38.3299	39.0766	9797.39	8027.9	10460.3	10164.5	10.6591	14.372	14.4347	14.5956
ENSDARG00000019874	hsph1	8.1451	0	-0.942185	1.04397e-05	50.1863	44.2515	34.9478	30.7876	11398.2	9443.15	11984.7	11694.2	19.3197	19.1626	18.7651	24.0828
ENSDARG00000079462	NA	8.21942	0	-0.944712	6.15561e-05	45.3295	28.9923	22.547	20.1304	8549.6	7882.51	8640.87	8479.02	12.6577	16.7673	13.7129	15.3254
ENSDARG00000063899	mt-nd2	1.43766	7.72369e-306	1.32593	1.45078e-260	9122.57	8865.55	8483.3	8194.24	23549	22181.3	23891.1	24228.9	21382.9	21732.8	21746.6	21994.9
ENSDARG00000027088	ptgdsb	1.60529	1.27676e-305	-0.687141	6.22028e-48	1351.79	1277.19	1209.65	1268.21	3883.2	3698.14	3974.04	3944.16	774.785	794.45	816.281	778.676
ENSDARG00000012369	rdh10b	-1.17734	1.51832e-305	-0.923646	1.65608e-204	4426.1	4345.8	4297.45	4223.82	1911.8	1924.13	1970.9	1834.77	2281.05	2320.27	2266.24	2242.62
ENSDARG00000003035	hspa9	2.3274	6.30291e-304	1.63944	1.01098e-149	733.367	726.334	691.065	599.174	3450.71	3189.26	3673.08	3441.92	2116.5	2194.92	2117.57	2109.07
ENSDARG00000057882	arpc3	2.66056	1.914e-303	1.15583	1.02261e-53	200.745	190.739	244.635	220.25	1350.18	1361.43	1343.57	1421.92	482.325	495.833	472.736	479.466
ENSDARG00000096081	NA	-4.254	4.07153e-303	-0.610824	1.18447e-21	904.972	915.548	919.917	936.654	39.7336	72.6977	47.88	34.0967	598.91	620.39	580.274	610.097
ENSDARG00000044339	rp2	-2.35746	7.38438e-302	-1.65838	6.33529e-172	2486.65	2452.14	2155.49	2191.84	466.106	422.968	475.868	442.335	745.472	740.954	726.786	722.483
ENSDARG00000041908	usp39	-4.00517	1.6643e-300	-1.4352	3.44468e-90	995.631	964.377	988.685	960.336	58.8363	77.4183	39.0857	67.2718	355.748	369.679	339.215	380.945
ENSDARG00000025554	WDR83OS	1.96049	3.70489e-300	1.35755	1.22086e-141	474.341	488.292	505.052	502.075	1978.28	1822.16	1961.12	1923.24	1231.8	1251.16	1296.23	1282.95
ENSDARG00000019763	acp5a	2.80276	2.32006e-299	4.4205	0	228.267	259.405	304.384	262.879	1845.32	2051.59	1776.44	1757.36	5732.61	5571.53	5817.89	5684.26
ENSDARG00000031435	zgc:56493	1.56352	2.56362e-299	0.138717	0.00199251	2075.44	1913.49	2100.25	2164.61	6018.11	6335.08	6167.72	5915.31	2191.12	2324.27	2246.04	2341.14
ENSDARG00000008237	sars	3.95231	1.2847e-298	2.68477	4.85922e-135	85.8023	88.5029	122.881	101.836	1626.02	1381.26	1624.01	1653.23	655.536	648.335	640.899	665.56
ENSDARG00000029722	hmgb2a	1.14076	2.31893e-298	0.396646	5.32731e-37	14838.9	14216.9	13900.2	13764.4	30984.6	30116.7	32103	31817.7	18287.7	18750.6	19032.8	18570
ENSDARG00000093569	NA	2.80434	5.00786e-297	3.13562	0	220.172	196.843	224.342	255.774	1549.61	1469.06	1685.57	1609.92	2057.21	1966.56	1997.76	1919.32
ENSDARG00000027899	shfm1	1.29968	1.37768e-296	0.308825	3.23103e-17	1837.46	1855.51	1898.46	1944.36	4615.21	4815.04	4590.61	4559.74	2259.73	2353.81	2407.7	2329.46
ENSDARG00000008243	cct8	4.32923	9.24309e-296	1.81311	5.3709e-50	108.467	108.34	114.99	76.969	2104.35	1760.79	2160.46	2168.36	345.755	341.733	356.536	387.513
ENSDARG00000104359	anxa1c	3.26743	1.48862e-294	0.958091	2.10339e-23	111.705	126.651	147.683	133.808	1335.66	1266.07	1225.34	1237.62	262.481	243.525	251.163	264.181
ENSDARG00000009133	myo1eb	-2.54251	1.51823e-294	-0.673652	3.06135e-35	1175.33	1115.44	1131.86	1075.2	184.15	221.87	177.84	187.993	686.847	709.017	716.682	704.238
ENSDARG00000053484	syne2b	-3.0842	1.6644e-294	-1.39453	7.91064e-75	2344.18	2337.7	2236.66	2191.84	259.797	324.779	231.583	257.107	866.054	948.549	846.594	802.759
ENSDARG00000013475	cct4	2.54955	2.48067e-293	0.622523	3.20552e-18	1034.48	1054.41	1211.9	1213.74	6616.41	6020.69	6925.98	6949.27	1762.75	1756.57	1608.02	1842.7
ENSDARG00000015543	s100a1	2.37818	9.71657e-291	-0.88436	3.24738e-30	432.249	337.227	359.624	373.004	1953.06	1986.44	1864.39	1977.61	204.522	193.223	215.077	197.041
ENSDARG00000086425	prpf3	2.77511	1.52117e-290	0.0378453	0.706861	386.92	332.649	359.624	396.686	2586.51	2387.69	2546.43	2596.88	429.03	381.655	342.102	362.701
ENSDARG00000090054	NA	-1.88859	2.11992e-290	-2.02799	0	2091.63	2043.2	1953.7	1943.17	576.902	520.213	526.68	537.253	512.304	477.469	494.388	480.196
ENSDARG00000102105	dad1	1.7241	1.51439e-288	1.65457	3.97938e-269	699.37	744.645	757.578	711.667	2460.43	2470.78	2342.21	2362.81	2219.1	2302.71	2267.69	2398.06
ENSDARG00000063292	ssuh2rs1	-2.41535	5.11068e-288	-3.54663	0	1704.71	1628.15	1599.71	1582.01	312.52	294.567	298.028	313.321	130.574	148.51	158.781	119.684
ENSDARG00000074758	csde1	-2.40384	8.58217e-288	-0.417156	1.61332e-10	8167.41	7942.38	7026.77	6959.18	1402.14	1593.68	1351.39	1335.3	5548.74	5689.7	5582.61	5705.42
ENSDARG00000087443	ptp4a2a	2.51017	3.98021e-286	1.37153	1.8557e-84	595.76	624.098	638.079	608.647	3501.14	3066.52	3755.16	3747.87	1569.56	1632.02	1607.3	1581.43
ENSDARG00000020504	h3f3a	1.27489	4.97118e-286	-0.346132	6.22998e-22	12553	12732.2	13770.6	13970.5	31867.1	32281.5	31593.9	32654.5	10296	10453.2	10504.1	10486.9
ENSDARG00000100630	NA	2.6254	8.13445e-286	-0.0173544	0.869898	4448.77	4368.69	5034.74	5223.24	29304.3	33416.4	28130	26982.5	4644.05	4852.93	4755.5	4607.1
ENSDARG00000036764	hax1	5.47005	3.91828e-285	0.629442	0.000250803	51.8052	36.6219	45.094	54.4704	2050.87	1834.44	2298.24	2216.28	63.2885	80.6427	66.3995	83.195
ENSDARG00000028096	clnd23a	4.51147	6.43482e-284	-0.386596	0.0137082	74.4699	85.4511	65.3862	60.3911	1633.66	1419.97	1693.39	1694.7	54.628	55.891	51.9648	53.274
ENSDARG00000101032	iqcb1	-4.55525	3.7587e-283	-1.0373	1.69709e-49	950.301	897.237	886.096	922.444	25.2156	50.9828	34.2	46.9981	422.368	475.872	442.423	440.787
ENSDARG00000042322	si:dkey-177p2.6	2.16077	1.01599e-282	1.66871	5.89568e-167	305.974	329.597	349.478	330.375	1506.06	1406.75	1529.23	1468	1049.26	1035.58	1071.77	1045.78
ENSDARG00000041332	tmem33	4.20735	1.1214e-282	1.74501	9.92752e-47	108.467	80.8734	112.735	91.1787	1818.58	1608.79	1948.42	1928.77	323.771	295.424	357.258	347.376
ENSDARG00000035332	c10h21orf59	-1.59735	2.05958e-281	-0.261626	4.64655e-10	3553.51	3376.84	3564.68	3560.7	1085.03	1274.57	1154.01	1139.01	2947.25	2907.13	2948.28	2925.69
ENSDARG00000001557	NA	5.0745	2.52394e-281	0.488824	0.00222911	71.2321	57.9847	60.8768	80.5214	2414.58	1894.86	2478.03	2380.32	94.5997	109.387	93.8254	83.9248
ENSDARG00000098058	NA	3.39465	6.52144e-281	0.255022	0.0179225	144.083	169.376	202.923	181.173	1859.84	1892.03	1798.92	1871.63	203.856	233.944	177.546	227.692
ENSDARG00000037640	aurkb	3.61199	9.0837e-281	2.99165	1.37511e-191	119.799	135.806	137.537	161.043	1786.48	1459.62	1787.19	1803.44	1115.21	1116.22	1095.59	1120.94
ENSDARG00000019404	atp5d	1.78087	2.36209e-274	0.916158	5.30738e-70	516.433	486.766	496.033	510.364	1721.54	1772.12	1724.66	1687.32	917.351	970.107	950.523	956.013
ENSDARG00000092662	dnaaf3	-2.9379	9.31808e-273	-1.17081	1.42805e-65	1176.95	1068.14	1281.8	1256.37	151.293	172.775	160.251	141.916	524.296	542.142	536.248	526.902
ENSDARG00000054864	aplp2	-2.37765	9.77963e-273	-1.75007	6.01198e-169	1981.55	2131.7	2138.58	2027.25	404.213	456.957	361.543	369.534	611.567	630.769	637.291	582.365
ENSDARG00000054324	rerglb	-2.32552	6.28234e-272	-2.18558	1.22223e-252	3058.12	3114.39	2754.11	2657.21	557.035	541.928	617.554	592.545	658.867	646.738	625.021	611.556
ENSDARG00000102831	NA	-5.22036	1.05311e-271	-0.830547	7.80399e-38	971.347	964.377	925.553	895.209	19.8668	43.4298	9.77142	27.646	535.621	526.173	526.144	520.334
ENSDARG00000059075	nip7	3.10715	1.49464e-271	0.938884	1.00106e-22	121.418	117.495	136.409	108.941	1037.66	1041.37	1068.02	1042.25	231.836	235.54	237.45	226.962
ENSDARG00000017385	b9d2	-2.3101	2.80772e-270	-1.33206	1.89989e-122	1244.94	1266.51	1179.21	1142.69	245.279	257.746	241.354	227.618	461.007	489.445	479.231	486.764
ENSDARG00000037199	zgc:101851	3.4592	3.22705e-270	1.33479	2.5049e-38	155.416	148.014	113.862	138.544	1563.36	1390.7	1612.28	1485.51	329.767	347.322	378.91	332.05
ENSDARG00000012972	cfl1l	1.39789	4.95481e-269	-1.40503	5.92982e-210	1834.23	1719.7	1796.99	1719.37	4767.27	4414.73	4702.01	4736.67	683.516	655.521	673.378	654.613
ENSDARG00000006427	fabp2	3.28823	2.49772e-268	4.16143	0	220.172	169.376	193.904	233.275	1985.15	2292.34	1839.96	1889.14	3637.43	3739.9	3747.96	3543.08
ENSDARG00000102184	mib1	-3.34457	1.58996e-267	-1.09928	7.77794e-40	1894.13	1814.31	1556.87	1551.22	146.709	200.155	164.16	160.347	804.098	780.877	793.907	796.191
ENSDARG00000026871	uchl1	3.88967	4.52604e-267	-2.02789	6.37815e-52	359.398	297.553	224.342	274.72	4204.89	3802.94	4605.27	4410.45	62.6224	75.0536	70.0082	73.7078
ENSDARG00000062978	ccdc151	-3.85195	1.16394e-265	-0.447669	2.54583e-06	1886.03	1904.34	1589.56	1687.4	115.38	161.446	119.211	93.0747	1295.08	1337.39	1276.03	1267.63
ENSDARG00000012030	dnaaf1	-3.96102	5.4429e-265	-1.28334	1.98057e-51	1110.57	1145.96	1126.22	1006.52	64.1851	99.1332	68.4	50.6843	463.672	447.128	443.866	446.626
ENSDARG00000016153	dag1	-3.29598	6.24169e-264	0.0336683	0.624331	780.315	738.542	731.649	734.166	71.8262	100.077	65.4685	66.3503	764.792	767.303	760.707	757.512
ENSDARG00000094977	NA	-2.62173	1.24357e-263	-0.972029	4.06021e-62	879.069	955.221	901.879	939.022	147.473	153.893	146.571	149.288	465.67	497.43	455.414	456.843
ENSDARG00000093058	si:dkey-13i19.8	2.42878	6.49394e-263	1.78472	2.51845e-140	336.734	271.612	329.186	294.851	1670.34	1528.54	1731.5	1713.13	1096.56	1065.92	1036.41	1051.61
ENSDARG00000002240	psmb6	1.80145	6.58412e-263	0.508142	1.39585e-20	592.522	651.565	609.896	593.253	2124.98	2020.43	2188.8	2188.64	846.734	883.077	850.202	898.36
ENSDARG00000057890	si:dkey-33c12.4	1.71236	4.25803e-262	1.84359	0	762.507	752.275	810.564	853.764	2564.35	2661.49	2649.03	2586.74	2888.62	2947.05	2926.63	2693.62
ENSDARG00000051783	rplp0	1.49681	1.82483e-261	0.648543	6.88565e-50	8120.46	8395.57	8385.22	8259.37	23215.9	21443.9	24151	24792	13065.4	12748.7	12758.1	13415.6
ENSDARG00000027112	ephb4b	-3.57006	2.44992e-261	-2.07176	6.64486e-95	5829.7	5851.88	5663.8	5609.26	453.88	628.788	392.811	455.237	1384.35	1331	1294.79	1445.7
ENSDARG00000075864	igsf9a	-3.33457	4.42813e-261	-0.724539	1.02617e-19	1397.12	1387.05	1302.09	1201.9	110.796	168.054	121.166	125.328	802.099	817.605	806.176	769.918
ENSDARG00000035694	stm	-2.21371	1.08471e-260	-2.01512	9.9897e-218	23127.8	21887.7	19274.3	18896.5	4347.77	4268.39	4779.2	4530.25	5101.72	5200.25	5252.06	5015.78
ENSDARG00000097635	wu:fb18f06	4.76011	2.30144e-260	3.30339	2.94221e-123	58.2808	45.7774	47.3486	49.7338	1434.23	1284.96	1281.03	1432.06	473.665	460.701	555.735	488.953
ENSDARG00000059933	plpp3	-2.23493	4.1007e-260	-0.904198	4.31857e-59	1379.31	1290.92	1294.2	1362.94	281.956	304.009	296.074	249.735	704.168	740.954	724.621	676.507
ENSDARG00000035810	rgcc	1.97856	1.80997e-259	1.86185	2.33878e-231	679.943	659.194	614.405	596.806	2540.66	2331.05	2577.7	2561.86	2308.37	2307.5	2421.42	2196.64
ENSDARG00000056896	NA	-4.65615	1.90101e-259	-2.76164	9.30396e-129	1958.88	1924.18	1525.3	1612.8	58.0722	90.6361	66.4457	63.5857	269.143	274.664	225.903	263.451
ENSDARG00000099966	polr2a	-3.60748	7.23341e-259	-2.05723	9.8721e-108	1863.37	1882.98	1583.93	1714.63	115.38	178.44	150.48	135.465	399.717	415.988	425.101	449.545
ENSDARG00000092998	NA	4.31353	1.15276e-258	1.15052	6.92535e-18	79.3267	82.3993	112.735	75.7849	1817.81	1493.61	1905.43	1831.08	189.199	199.611	201.364	196.311
ENSDARG00000086523	NA	-5.16862	3.91614e-258	-2.89152	7.59796e-138	1630.24	1579.32	1438.5	1364.13	38.9695	67.0329	29.3143	31.3321	214.515	190.029	205.694	197.771
ENSDARG00000003681	eif5	2.08485	5.51184e-258	2.37253	0	833.74	854.511	793.654	844.291	3572.97	3115.62	3707.28	3704.56	4291.63	4236.53	4271.94	4412.98
ENSDARG00000025350	prdx2	2.43189	5.57654e-258	1.01794	2.05705e-43	286.547	309.76	303.257	287.746	1603.1	1464.34	1676.78	1666.13	590.249	598.033	588.213	629.071
ENSDARG00000058650	dpm3	1.69898	5.61745e-258	1.255	1.00821e-139	563.381	564.588	543.382	530.494	1729.18	1767.4	1846.8	1792.38	1321.07	1279.9	1343.15	1296.09
ENSDARG00000087554	cdk1	2.06212	1.10768e-257	0.76617	8.06153e-35	505.1	578.321	571.566	549.44	2313.72	2122.39	2355.89	2434.69	953.325	958.929	936.089	909.307
ENSDARG00000092035	si:ch211-156j16.1	7.02989	1.5263e-257	6.54693	2.90903e-223	24.2837	22.8887	16.9102	18.9462	2758.43	2162.99	2974.42	2873.34	1919.97	1967.36	1895.99	1921.51
ENSDARG00000013144	atp1b1a	-1.70447	2.49556e-257	0.0388206	0.437128	1988.02	1899.76	2058.54	1950.28	580.722	669.385	596.057	581.487	2009.91	2015.27	2017.97	2075.5
ENSDARG00000056012	eve1	2.44769	1.22099e-256	-1.4288	2.34245e-65	543.954	538.647	474.614	503.259	2811.15	2518.93	2940.22	2934.16	185.868	183.642	186.929	205.798
ENSDARG00000079639	NA	-2.58869	1.87521e-256	0.289458	2.69692e-07	942.207	1007.1	897.37	914.155	145.181	178.44	146.571	154.817	1133.86	1114.63	1149.72	1187.35
ENSDARG00000055647	ftr82	2.93714	4.53336e-256	1.47478	1.58845e-63	335.115	292.975	311.148	351.689	2497.1	2128.06	2564.02	2715.75	877.379	923.798	912.271	880.845
ENSDARG00000057303	galnt7	-3.35968	4.64495e-256	-1.03694	2.30556e-42	1087.91	1049.83	977.411	973.362	93.9853	131.233	85.9885	86.624	504.976	483.856	510.266	488.953
ENSDARG00000012274	eif4e1c	2.93495	1.80299e-255	2.34989	1.37679e-162	176.461	173.954	189.395	219.066	1434.23	1335.94	1468.64	1611.76	992.631	974.1	974.34	958.202
ENSDARG00000077052	tnrc18	-3.10619	2.43085e-255	-0.637746	4.99793e-18	1246.56	1263.46	1090.15	1056.25	126.078	155.781	134.846	123.485	747.471	731.373	735.447	769.918
ENSDARG00000017891	tcp1	2.92358	4.8067e-255	-0.151297	0.110056	1039.34	956.747	936.827	928.365	7159.69	6077.34	7912.9	8136.21	850.731	830.38	912.993	878.656
ENSDARG00000054155	pcna	1.74413	2.48545e-254	0.450741	4.48662e-17	686.419	720.231	740.668	712.851	2485.64	2354.65	2416.47	2339.77	968.648	1000.45	916.602	1031.91
ENSDARG00000054355	dcaf7	2.76811	3.12163e-254	0.406877	2.26855e-06	396.633	439.463	474.614	421.553	2964.74	2639.78	3267.56	2968.25	568.265	598.033	607.7	529.821
ENSDARG00000099865	hnrnpabb	1.34381	1.45712e-253	0.895616	3.92912e-113	11364.8	11453.5	11406.5	11474.3	28991	26527.1	30153.6	30332.2	21187.7	21094.8	21216.1	21525.6
ENSDARG00000016871	smarce1	1.48619	3.665e-253	0.910992	4.69302e-95	2073.83	2150.01	2136.33	2037.9	5937.88	5440.05	5933.21	6213.89	3895.91	4035.33	3900.25	3960.52
ENSDARG00000058226	ak3	1.30451	8.64779e-252	1.91922	0	1583.3	1574.74	1568.14	1441.1	3850.34	3818.04	3892.93	3647.42	5850.53	5668.14	5924.71	5844.08
ENSDARG00000017427	phf20l1	-2.80077	1.41724e-250	-0.646611	2.91805e-21	1183.42	1306.18	1066.47	1124.93	152.822	183.16	165.137	170.483	754.133	753.73	726.786	748.025
ENSDARG00000079994	NA	-4.39016	1.41408e-249	-3.03378	1.55429e-183	1196.38	1176.48	1081.13	1082.3	48.9029	76.4742	39.0857	51.6058	132.573	122.96	143.625	153.254
ENSDARG00000099358	hccsb	2.54595	1.84093e-249	1.2257	1.72779e-56	364.255	372.323	315.658	338.664	2062.33	1835.38	2207.36	1980.37	836.075	797.644	822.776	780.135
ENSDARG00000018602	rab5aa	-1.7481	2.60599e-249	-0.43387	3.13315e-21	1733.85	1767.01	1625.64	1683.85	504.311	499.443	490.525	528.959	1289.09	1202.45	1236.33	1302.66
ENSDARG00000009447	atp5g3b	1.58297	2.94349e-249	0.538773	2.46358e-28	788.41	746.171	756.451	768.506	2321.36	2321.61	2180.98	2334.24	1101.89	1115.42	1069.61	1155.97
ENSDARG00000105127	si:ch211-155e24.3	-3.96099	8.62716e-248	-0.292017	0.000636735	1016.68	994.895	942.464	954.416	46.6106	87.8037	45.9257	71.8795	824.084	756.923	781.638	825.382
ENSDARG00000036082	tph1b	-4.27215	2.27971e-247	-2.38436	4.64984e-142	1032.87	964.377	952.61	886.92	42.0259	59.4799	43.9714	53.4489	199.859	187.634	155.894	189.743
ENSDARG00000022280	brd2a	-2.36647	1.82609e-244	-1.63896	1.30577e-128	3173.07	3070.14	2781.17	2683.26	545.573	625.955	574.56	522.509	967.982	966.115	931.036	888.873
ENSDARG00000099161	dyx1c1	-5.98685	2.26567e-244	-2.10459	1.57883e-144	1028.01	1133.75	1094.66	1142.69	11.4616	37.765	12.7029	8.29379	249.157	265.881	252.607	256.153
ENSDARG00000058366	si:dkey-222f8.3	-1.96997	6.54885e-244	1.0626	2.86456e-82	3921	3810.2	3615.41	3479	877.96	1069.69	940.988	895.729	7643.92	7903.78	7739.87	7657.59
ENSDARG00000037244	gpr137	3.49498	3.5145e-243	4.0129	0	131.132	146.488	113.862	138.544	1494.6	1262.3	1563.43	1633.88	2117.83	2208.49	2117.57	2083.52
ENSDARG00000042620	gstr	4.50597	7.44378e-243	3.35023	7.30131e-133	61.5186	53.4069	73.2777	63.9435	1490.01	1206.59	1564.4	1544.49	616.231	685.064	661.83	642.937
ENSDARG00000029252	ssb	1.97576	7.98209e-243	0.462535	9.57474e-14	692.894	714.127	636.952	602.727	2640.76	2440.57	2691.05	2593.19	855.395	911.821	923.819	941.417
ENSDARG00000089578	NA	-3.70016	8.14068e-243	-2.1893	1.41863e-114	1502.35	1426.73	1333.65	1301.37	123.021	130.289	85.0114	86.624	301.786	329.757	296.633	290.453
ENSDARG00000086826	sult6b1	1.70757	1.38452e-242	1.3686	4.04558e-156	3844.92	3913.97	3993.07	3791.61	12552.8	11346.5	13390.8	13490.3	9970.28	10158.6	10049.4	9967.34
ENSDARG00000079350	znf654	-4.31236	4.74187e-242	-2.89194	4.12269e-183	1016.68	1036.09	895.115	862.053	51.9593	57.5917	36.1543	44.2335	124.579	121.363	133.521	132.09
ENSDARG00000033466	tagln2	2.23557	5.35493e-242	0.416439	3.42213e-09	615.186	575.269	718.121	699.826	3157.29	2839.93	3255.84	3098.19	870.051	879.883	859.585	890.332
ENSDARG00000006399	ywhae1	-1.36244	1.26326e-241	-0.866649	1.22826e-106	3976.05	4060.45	3911.9	3836.61	1461.74	1596.52	1624.01	1459.71	2196.45	2171.76	2123.34	2159.42
ENSDARG00000033175	snrpe	1.54316	1.65055e-241	0.587921	3.72265e-35	1395.5	1385.53	1483.59	1444.65	4184.26	4467.6	3917.36	4096.21	2114.5	2140.62	2152.21	2188.61
ENSDARG00000038754	plk3	-2.37324	2.81275e-241	-2.42414	1.23223e-262	1903.84	1933.33	1718.08	1657.79	337.736	375.762	345.908	330.83	321.106	336.144	355.815	328.401
ENSDARG00000016750	abcc6a	-2.37725	3.66236e-241	-1.63443	4.65992e-139	1401.98	1460.3	1341.55	1320.31	287.305	250.193	279.463	242.363	439.023	473.476	412.832	452.464
ENSDARG00000053684	aldob	3.01613	9.94345e-241	1.43055	1.02789e-54	1311.32	1106.29	1251.36	1325.05	10317	8139.31	10784.7	11210.4	3255.7	3363.84	3402.97	3450.4
ENSDARG00000002613	rpa3	1.94723	1.35451e-240	0.884464	1.0255e-47	404.728	364.693	393.445	377.74	1527.45	1516.27	1437.38	1456.94	743.474	685.862	702.969	709.347
ENSDARG00000044144	wapla	-2.42505	2.01715e-240	-2.06516	5.95178e-213	953.539	961.325	984.176	914.155	184.914	180.328	159.274	183.385	227.839	217.975	228.79	235.719
ENSDARG00000101576	ta	-1.71584	4.84969e-240	-1.24952	6.32908e-129	29956.3	28314.8	25978.6	25386.7	8337.18	7958.98	8800.14	8268.91	11409.9	11622.1	11606.9	11459
ENSDARG00000104227	nop10	1.60788	5.12939e-240	0.455432	7.29074e-20	1719.28	1469.45	1591.82	1608.06	4845.21	5143.6	4718.62	4761.56	2219.76	2083.93	2212.84	2238.97
ENSDARG00000097385	NA	5.37954	1.2934e-239	1.83337	1.94059e-26	22.6648	33.5701	46.2213	35.5242	1445.69	1318.94	1568.31	1597.94	128.576	119.766	117.643	140.848
ENSDARG00000098228	thrap3b	-1.26521	1.36168e-239	-0.119482	0.00109961	3574.56	3549.27	3383.17	3308.48	1376.92	1406.75	1492.1	1468.92	3165.09	3222.51	3163.36	3149
ENSDARG00000104963	NA	-3.62621	3.65814e-239	-3.55852	9.45903e-251	1376.07	1461.82	1232.19	1229.14	90.9289	103.854	117.257	117.956	109.256	109.387	130.634	99.2502
ENSDARG00000013575	rfx2	-1.74406	8.60878e-239	-1.13779	1.09096e-113	2703.58	2711.55	2535.41	2481.95	840.519	743.027	779.76	741.833	1135.2	1179.3	1207.46	1213.63
ENSDARG00000101986	irf6	-3.03878	8.82381e-239	-2.12949	3.09698e-141	1559.01	1696.81	1400.17	1542.93	194.848	204.875	193.474	159.425	367.74	312.989	358.702	373.648
ENSDARG00000103566	tomm20	3.14406	1.05075e-238	1.76081	1.16035e-72	121.418	157.169	160.084	164.595	1305.1	1216.98	1424.67	1441.28	519.632	512.6	495.109	537.118
ENSDARG00000018508	zdhhc8b	-3.06561	8.48886e-238	-1.76322	3.76601e-106	1220.66	1155.12	1244.59	1165.19	123.785	182.216	137.777	129.936	336.429	340.136	360.867	372.188
ENSDARG00000040668	lrtomt	-2.28647	1.13345e-237	-2.53272	4.13113e-296	1115.43	1100.18	1047.31	1068.09	234.581	223.758	208.131	217.482	203.856	179.65	182.599	179.526
ENSDARG00000026766	bcl2l10	1.6853	1.70428e-237	1.65608	3.0973e-232	833.74	755.327	685.428	719.956	2368.73	2406.58	2457.51	2344.38	2278.39	2402.51	2409.15	2295.16
ENSDARG00000037860	cox6b2	1.17822	1.87093e-237	0.12541	0.00102816	1573.58	1568.64	1618.87	1689.77	3632.57	3767.06	3641.81	3588.45	1788.73	1720.64	1795.67	1743.45
ENSDARG00000009978	icn	4.81722	2.59249e-237	-1.77817	2.67817e-18	66.3754	59.5106	66.5136	73.4166	1844.56	2265.9	1727.59	1708.52	22.6506	16.7673	21.652	16.0552
ENSDARG00000006025	tp53i11b	-2.24639	6.22964e-237	-1.66965	7.91355e-150	1808.32	1930.28	1623.38	1673.19	356.074	387.092	383.04	354.79	542.283	545.336	575.943	542.957
ENSDARG00000055076	nxf1	4.53825	6.73584e-237	1.13158	9.0583e-14	29.1404	35.096	56.3674	52.1021	1030.78	1007.38	1078.77	1056.08	89.2702	103.798	97.434	103.629
ENSDARG00000016771	tfa	1.95322	2.09195e-236	3.40977	0	602.235	573.743	611.023	620.489	2237.31	2593.51	2226.91	2285.4	6276.89	6364.38	6483.33	6513.29
ENSDARG00000001162	matr3l1.1	-2.46918	3.50305e-236	-0.0140255	0.868206	1047.44	975.058	959.374	993.492	166.576	214.317	164.16	173.248	950.661	987.673	1020.53	973.527
ENSDARG00000009681	med27	3.99004	2.17604e-235	1.54434	3.86908e-34	93.8969	77.8216	117.244	106.572	1645.89	1374.65	1625.96	1730.64	272.474	289.835	325.502	282.425
ENSDARG00000037350	rpl9	1.02933	5.47665e-235	0.0109024	0.794718	3587.51	3408.89	3599.62	3698.06	7387.4	7046.95	7277.76	7488.37	3626.1	3640.9	3610.11	3539.44
ENSDARG00000009549	ubr4	-3.29454	6.3153e-235	-2.43774	2.57991e-149	1860.13	2030.99	1763.17	1724.11	184.15	232.255	155.366	178.777	342.424	356.904	353.649	307.238
ENSDARG00000103594	NA	2.12407	1.19322e-234	0.618267	2.77902e-20	785.172	802.63	789.144	764.954	3478.22	3000.43	3590.02	3624.39	1206.48	1215.23	1239.22	1160.35
ENSDARG00000091419	nrarpa	-1.89385	3.00249e-234	-1.40149	6.85208e-138	3491.99	3582.84	3112.61	3088.23	904.704	834.607	906.788	919.689	1270.43	1252.76	1264.48	1229.68
ENSDARG00000004171	rabac1	-2.29877	3.59496e-234	-1.54408	1.40855e-131	1259.51	1248.2	1278.41	1211.37	269.73	267.188	235.491	240.52	459.675	403.213	447.475	400.65
ENSDARG00000007320	rpl7	1.15904	4.9645e-234	-0.0551979	0.160043	3955	3993.31	4291.82	4330.39	9309.13	9441.26	8996.55	9313.92	3980.52	4010.58	3885.09	4097.72
ENSDARG00000100582	NA	2.45858	6.89464e-234	0.995133	1.15025e-36	203.983	265.509	245.762	243.933	1337.95	1236.8	1313.28	1404.41	491.652	485.453	466.24	475.817
ENSDARG00000016516	rbm8a	1.36317	1.1851e-233	0.875417	1.34633e-96	2871.95	2865.66	3069.77	2982.85	7608.99	7046.01	7830.82	7879.1	5300.92	5524.42	5399.29	5431.03
ENSDARG00000003411	foxa2	5.80364	2.22783e-233	5.3099	3.49684e-195	19.4269	25.9405	30.4384	36.7083	1636.72	1338.77	1758.86	1760.13	1133.86	1154.55	1198.08	1125.32
ENSDARG00000029510	timm17a	2.81276	2.63858e-233	2.53136	3.22226e-189	189.413	172.428	173.612	166.964	1215.7	1105.57	1276.15	1324.24	978.641	1047.56	1018.37	1005.64
ENSDARG00000068641	taf10	1.61647	2.74296e-233	0.278051	1.20031e-07	762.507	744.645	772.234	836.002	2403.88	2360.31	2400.84	2411.65	906.692	991.665	905.776	985.934
ENSDARG00000070448	grk4	-2.30557	1.20796e-232	-2.13284	2.2954e-225	1128.38	1164.27	1063.09	1090.59	200.96	225.646	245.263	229.461	247.158	257.098	247.555	260.532
ENSDARG00000044056	ahi1	-4.07556	5.53621e-232	-1.46424	3.42578e-67	796.505	849.933	795.908	741.271	35.9131	56.6475	45.9257	51.6058	299.122	281.85	260.546	310.157
ENSDARG00000014230	dlst	-4.92813	1.99169e-230	-1.06645	6.30797e-25	1157.52	1156.64	1011.23	947.311	32.8566	54.7593	27.36	24.8814	478.328	503.817	544.187	510.117
ENSDARG00000002332	frmd6	-3.73553	2.20787e-230	-1.55429	2.65802e-73	908.209	862.141	826.347	840.738	64.1851	88.7478	49.8343	54.3704	287.13	317.78	280.754	283.885
ENSDARG00000101120	kif3b	-5.13281	3.99925e-230	0.37087	2.16728e-07	859.642	802.63	788.017	748.376	12.2257	43.4298	18.5657	18.4306	1042.6	1040.37	1055.17	989.582
ENSDARG00000010481	bzw1a	1.01143	4.55462e-230	-0.665721	1.02245e-92	4481.15	4406.84	4708.94	4648.93	9416.87	9185.4	9267.22	8950.84	2905.94	2842.45	2799.6	2965.1
ENSDARG00000008732	zgc:66479	-3.60286	1.03744e-229	-7.39036	6.66861e-166	966.49	1010.15	889.478	982.835	67.2415	75.5301	78.1714	96.7609	5.99576	4.79065	5.05214	6.56803
ENSDARG00000062972	hip1	-2.01396	1.50152e-229	-1.31114	1.1877e-107	2904.33	2854.98	2589.52	2491.43	668.595	730.753	626.348	653.366	1085.23	1097.06	1073.94	1105.62
ENSDARG00000006292	NA	-5.49792	2.07789e-229	-1.27651	4.86916e-33	1303.22	1231.41	1019.12	1021.91	16.8104	37.765	18.5657	28.5675	461.007	492.639	471.292	459.762
ENSDARG00000058365	NA	6.45131	2.92458e-228	0.0682808	0.833946	14.5702	16.785	25.929	23.6828	1916.38	1610.68	1980.67	1855.04	21.3182	23.1548	20.2085	23.353
ENSDARG00000038030	rbx1	2.32999	1.26512e-227	1.58322	1.69034e-104	485.674	512.707	552.401	614.568	2630.82	3052.36	2630.47	2631.9	1604.86	1621.64	1648.44	1646.38
ENSDARG00000008890	ctns	-4.93817	1.78503e-227	-1.86392	1.37146e-81	934.112	993.369	945.846	811.135	32.8566	44.3739	18.5657	23.0383	248.491	271.47	243.224	248.125
ENSDARG00000077409	NA	-3.39623	2.75023e-227	-0.604528	6.70361e-10	2507.69	2607.78	2231.02	2259.34	194.083	293.623	192.497	232.226	1513.6	1568.94	1616.68	1613.54
ENSDARG00000041947	styk1	4.23962	5.36483e-227	0.644634	1.32707e-05	84.1834	44.2515	64.2589	53.2862	1172.14	1229.25	1123.71	1093.86	104.593	105.394	85.1646	86.8439
ENSDARG00000041723	zgc:55461	-2.17297	1.25886e-226	1.32297	4.97698e-102	2412.18	2470.45	2676.33	2498.53	541.753	657.112	497.365	535.41	6312.87	6236.63	6152.06	6481.91
ENSDARG00000079751	megf8	-4.3526	1.76921e-226	-1.55187	5.26436e-47	1327.51	1245.14	1167.93	1199.53	53.4876	92.5243	46.9028	48.8412	417.704	418.384	454.692	391.892
ENSDARG00000055595	clul1	-3.81014	3.64415e-226	-1.31058	4.19573e-58	822.407	724.809	738.413	724.693	47.3747	69.8653	48.8571	48.8412	307.782	276.261	316.841	309.427
ENSDARG00000022187	NA	-5.78762	7.78946e-226	-2.03808	2.9517e-58	1622.15	1570.16	1282.92	1368.86	21.395	44.3739	27.36	12.9014	326.436	384.051	369.528	340.808
ENSDARG00000078433	spc25	3.53769	7.78946e-226	1.4864	4.06467e-38	79.3267	109.866	109.353	107.757	1230.98	1053.64	1304.48	1179.56	291.127	293.028	278.589	287.534
ENSDARG00000007179	NA	-2.01374	2.74699e-225	0.14812	0.00649579	1384.17	1264.98	1243.47	1226.77	298.766	338.941	328.32	301.341	1357.04	1411.65	1455.02	1437.67
ENSDARG00000034080	plcd1b	-3.29763	5.55194e-225	-1.35789	1.42276e-57	1079.81	1100.18	1030.4	1001.78	103.155	145.395	89.8971	89.3886	411.042	406.407	414.997	408.677
ENSDARG00000010586	NA	-6.08017	9.29515e-225	-2.75412	3.67145e-95	1706.33	1695.29	1443.01	1457.67	17.5745	46.2622	13.68	15.666	223.842	231.548	233.842	243.017
ENSDARG00000016532	NA	-1.43318	2.745e-224	-0.638127	4.28964e-54	2136.96	2059.98	2061.92	2015.4	738.892	790.233	774.874	760.264	1351.04	1386.1	1293.35	1282.22
ENSDARG00000097268	NA	7.78837	1.13131e-223	0.297009	0.365822	9.71347	18.311	9.01879	13.0255	2811.15	2585.96	2701.8	2918.49	21.9844	13.5735	14.4347	10.2169
ENSDARG00000058328	lsm7	1.61827	1.43107e-223	0.149827	0.00515717	2467.22	2215.63	2246.81	2104.21	7113.85	6502.19	7026.63	7055.25	2565.52	2575.77	2476.99	2390.76
ENSDARG00000087709	NA	-3.37566	3.50686e-223	-2.8841	4.44599e-180	2143.44	2128.65	1750.77	1788.05	180.329	219.981	175.886	175.091	289.129	267.478	229.511	269.289
ENSDARG00000037867	si:ch211-194i10.5	3.06658	4.12852e-223	2.45737	4.24571e-142	100.373	119.021	139.791	157.49	1074.34	1132.95	1086.58	1115.98	692.177	691.451	791.742	714.455
ENSDARG00000103415	NA	-2.74761	4.72512e-223	0.337826	4.69636e-08	814.313	807.208	722.631	722.325	105.447	126.513	116.28	107.819	960.654	928.588	978.671	991.772
ENSDARG00000059128	uqcrh	1.69492	6.22951e-223	0.962195	1.35052e-71	1086.29	1025.41	1206.26	1256.37	3658.55	3743.46	3760.04	3712.85	2212.43	2312.29	2270.57	2155.77
ENSDARG00000094473	NA	-4.08693	6.47882e-223	-1.44367	2.57141e-66	796.505	753.801	696.702	690.353	35.9131	41.5415	58.6285	37.7828	262.481	287.439	259.102	268.559
ENSDARG00000055868	rsl1d1	2.22387	6.62813e-223	0.658692	1.83428e-19	445.201	389.108	402.464	380.108	1888.11	1748.52	1917.15	1978.53	599.576	686.66	646.673	614.475
ENSDARG00000058917	nnr	-1.85098	7.25146e-223	-1.7241	1.09009e-201	2952.9	3018.26	3376.41	3223.23	829.057	950.735	826.662	883.749	969.98	926.992	941.862	969.149
ENSDARG00000027397	vangl2	-1.73636	2.61025e-222	-0.129003	0.0155965	3134.21	3091.5	2888.27	2915.35	874.14	1003.61	841.32	888.357	2653.46	2853.63	2738.26	2746.16
ENSDARG00000020261	rab2a	2.34672	3.51142e-222	1.63202	4.75855e-107	497.006	601.21	658.372	612.2	3036.57	2736.08	3160.08	3179.29	1821.38	1905.88	1865.68	1787.23
ENSDARG00000058451	rpl6	1.0915	3.95413e-222	-0.123653	0.00058466	4442.29	4699.81	4793.49	4937.86	9928.06	10033.2	10162.3	10147	4175.05	4304.4	4407.63	4458.23
ENSDARG00000075380	kri1	-3.66595	4.27239e-222	-0.160115	0.0243927	624.9	631.728	650.48	626.409	48.1388	72.6977	44.9485	34.0967	582.255	569.289	558.622	558.282
ENSDARG00000104495	pltp	-1.92981	8.91309e-222	-1.1369	3.05309e-85	3056.51	2937.38	2851.07	2824.17	759.523	850.657	741.651	708.658	1361.04	1393.28	1225.5	1323.09
ENSDARG00000018985	NA	1.77148	2.75527e-221	1.71154	2.86712e-209	497.006	524.914	475.741	587.333	1738.35	1814.61	1783.28	1795.14	1739.44	1754.98	1672.98	1671.93
ENSDARG00000039669	TSTA3 (1 of many)	1.82816	2.90491e-221	0.391921	1.25226e-10	535.86	560.01	534.363	526.942	1961.47	2007.21	1915.2	1766.58	724.154	700.234	708.742	693.292
ENSDARG00000068289	eif3k	1.80287	9.85475e-221	0.985891	2.17569e-64	429.012	430.307	464.468	467.735	1567.95	1534.2	1554.63	1621.9	930.009	885.473	841.541	905.658
ENSDARG00000105037	snrpf	2.22501	1.87842e-220	-0.393687	1.1026e-07	875.831	1007.1	1136.37	1175.85	4961.35	5099.22	4819.27	4818.69	812.758	801.636	809.785	781.595
ENSDARG00000053370	eif3jb	4.51054	2.36924e-220	3.10995	1.81531e-103	40.4728	53.4069	71.023	79.3373	1460.21	1236.8	1553.66	1479.06	586.252	534.956	562.231	485.304
ENSDARG00000020621	ap1b1	-2.53187	6.2803e-220	-2.41651	1.65498e-218	1389.03	1368.74	1164.55	1203.08	223.884	219.037	218.88	221.168	245.16	245.92	230.233	235.719
ENSDARG00000068434	h3f3b.1	1.51959	1.04028e-219	0.631654	5.30842e-38	1249.8	1153.59	1351.69	1289.53	3751.77	3447.95	3563.64	3738.65	1983.93	1934.63	1944.35	1974.79
ENSDARG00000069563	zgc:153151	-3.31607	1.72773e-219	-4.39944	0	1720.9	1620.52	1374.24	1397.28	132.191	158.613	159.274	164.033	67.9519	79.0458	70.7299	71.5185
ENSDARG00000101324	apoa1b	2.24827	4.26422e-219	3.77026	0	806.218	740.068	906.388	921.26	3873.26	4448.72	3685.78	4086.07	11514.5	11579.8	11386.1	11746.5
ENSDARG00000021669	sec61a1	2.25407	9.86723e-219	0.657489	1.32228e-19	2306.95	2412.47	2419.29	2393.14	11434.1	9547	12292.5	12223.2	3760.01	3911.57	3624.55	3744.5
ENSDARG00000043571	KIF2A	2.80066	1.44294e-218	2.38591	2.73409e-158	173.224	173.954	217.578	189.462	1270.71	1208.48	1456.92	1371.24	971.313	1019.61	1011.15	977.906
ENSDARG00000003910	med13b	-4.40256	1.82683e-218	-1.08728	4.62773e-30	926.018	958.273	756.451	832.449	45.8465	47.2063	42.0171	27.646	385.061	396.027	416.44	432.76
ENSDARG00000005754	ptprfb	-2.10481	1.33629e-217	-0.0390111	0.582813	1703.1	1799.05	1696.66	1696.87	410.326	447.516	410.4	333.595	1669.49	1645.59	1649.16	1744.18
ENSDARG00000098477	tec	-4.28095	1.83916e-217	-3.71431	1.32188e-219	885.545	939.962	819.583	847.843	39.7336	60.4241	41.04	38.7043	55.2942	67.0692	77.9472	65.6803
ENSDARG00000036903	irak1bp1	-2.26298	2.07527e-217	-0.955898	1.70086e-51	1188.28	1263.46	1309.98	1288.34	252.156	297.4	266.76	238.677	670.192	657.118	675.543	603.529
ENSDARG00000016173	cct3	2.738	1.42009e-216	0.770767	7.421e-18	639.47	634.78	620.042	602.727	4120.83	3429.06	4545.67	4561.58	1044.59	1118.62	1022.7	1072.78
ENSDARG00000042641	cyp51	-2.60702	3.48432e-216	-2.42459	7.13485e-198	2397.61	2275.14	1950.31	2023.69	321.689	369.153	347.863	379.671	386.393	383.252	404.893	432.76
ENSDARG00000039543	mrps6	1.97013	5.79336e-216	2.17508	2.1964e-269	351.304	321.968	404.718	384.845	1424.3	1500.22	1390.47	1466.16	1693.47	1713.46	1598.64	1658.06
ENSDARG00000034409	pik3r3b	3.38864	9.22161e-216	1.49997	1.7964e-41	213.696	173.954	137.537	153.938	1825.45	1616.34	1877.09	1710.36	488.987	479.864	509.544	418.894
ENSDARG00000061120	slc43a2b	1.53022	1.19995e-215	3.07216	0	1128.38	970.481	1142	1108.35	3234.47	3292.17	3088.75	2971.02	9168.18	9188.47	9155.91	9147.8
ENSDARG00000055760	srm	2.93441	1.22826e-215	0.0188549	0.908614	199.126	198.369	223.215	226.17	1729.94	1485.11	1601.54	1693.78	201.857	188.432	237.45	234.26
ENSDARG00000055787	dzank1	-4.284	1.59842e-215	-2.81737	1.63797e-153	921.161	906.392	898.497	798.109	49.667	50.9828	45.9257	33.1751	108.59	112.58	137.129	140.848
ENSDARG00000021864	rplp1	1.68787	3.10619e-215	0.340695	5.86037e-10	4473.05	4617.41	5145.22	5084.69	15537.4	16712.9	14649.3	15413.5	6178.29	6058.58	5926.16	6326.47
ENSDARG00000077751	nol9	3.20277	3.18657e-215	2.20366	3.15123e-100	110.086	135.806	144.301	132.624	1163.74	1074.42	1308.39	1311.34	612.9	602.824	621.413	591.852
ENSDARG00000018953	gclm	-3.07936	4.08309e-215	-1.31011	3.19333e-52	1384.17	1399.26	1261.5	1174.67	169.632	177.496	118.234	148.367	530.291	511.802	534.805	523.982
ENSDARG00000038635	magoh	1.52167	8.60384e-215	1.03358	8.1972e-99	1040.96	1019.31	977.411	975.73	2887.56	3077.85	2735.02	2799.61	2043.22	2107.09	1992.71	2057.98
ENSDARG00000039887	c1qbp	2.78969	3.16092e-214	1.28094	1.1284e-42	153.797	132.754	116.117	127.887	927.627	888.422	894.085	916.924	310.447	308.997	312.511	342.997
ENSDARG00000075536	NA	-4.20296	3.18414e-214	-3.32764	1.46148e-150	2632.35	2589.47	2344.89	2474.85	140.596	187.881	120.189	94.9178	265.812	246.719	256.937	228.421
ENSDARG00000058800	rab25a	3.63328	5.48436e-214	-2.56685	2.59677e-35	85.8023	85.4511	59.7495	80.5214	968.889	916.746	961.508	966.687	11.3253	8.78287	20.2085	10.9467
ENSDARG00000070743	tmem45a	-4.22635	6.08678e-214	-7.43998	1.12917e-145	930.874	909.444	830.856	808.767	54.2517	54.7593	39.0857	35.9397	5.32956	5.5891	4.3304	4.37868
ENSDARG00000099291	lsr	-1.88699	1.54828e-213	-1.89524	2.67284e-219	5039.67	5058.4	4571.4	4465.39	1292.11	1159.39	1393.4	1324.24	1315.07	1262.34	1296.96	1263.98
ENSDARG00000058140	ttc25	-2.16233	1.71064e-213	-0.402996	9.3651e-12	1167.24	1202.42	1100.29	1096.51	243.75	245.473	257.966	271.852	834.743	929.387	861.75	823.192
ENSDARG00000022438	cox6a1	1.32594	3.18179e-213	0.698082	2.37304e-58	893.639	859.089	939.082	876.263	2169.3	2303.67	2243.52	2251.3	1459.63	1463.54	1417.48	1459.56
ENSDARG00000013472	nedd1	-4.86096	6.84545e-213	-1.83267	5.51767e-97	759.27	776.69	677.537	721.14	16.0463	33.9885	26.3828	25.8029	194.529	221.169	195.59	211.636
ENSDARG00000042864	rpl7l1	1.54629	1.01471e-212	1.14384	2.59741e-116	942.207	866.718	900.752	890.472	2612.49	2438.68	2731.11	2727.73	1984.6	2042.42	1948.68	1976.25
ENSDARG00000087779	pum3	2.63199	2.4439e-212	0.723596	1.07908e-15	157.034	180.058	200.668	228.539	1211.88	1139.56	1241.95	1220.11	307.782	332.95	333.441	308.697
ENSDARG00000014867	rpl8	1.04409	6.44229e-212	0.130251	0.00019312	4236.69	4222.2	4458.66	4570.78	9068.43	9355.34	8768.88	8914.9	4680.69	4832.17	4857.99	4796.12
ENSDARG00000036044	NA	1.0301	7.22921e-212	-0.59734	7.52737e-70	9673	9283.65	10198	9927.82	19999.8	20673.5	19210.6	19975.1	6460.76	6374.76	6473.23	6536.64
ENSDARG00000061242	tuft1a	-3.41698	1.1016e-211	-1.93425	7.26792e-86	1594.63	1571.69	1348.31	1285.97	116.144	142.563	148.526	136.387	403.048	378.462	403.449	329.131
ENSDARG00000043003	pcyt2	3.85382	1.55484e-211	-0.088108	0.588513	121.418	109.866	113.862	144.465	1834.62	1484.17	1956.24	1840.3	122.58	102.999	106.817	129.171
ENSDARG00000103589	gata6	2.57894	2.07145e-211	2.23165	2.50915e-158	330.258	297.553	313.403	290.114	1838.44	1580.47	1924.97	2005.25	1478.29	1425.22	1417.48	1455.18
ENSDARG00000056640	rpia	3.0518	4.90751e-211	2.942	2.49416e-197	76.0889	120.547	125.136	132.624	959.72	920.523	936.102	1023.82	895.366	849.543	936.81	876.466
ENSDARG00000020008	vcp	1.3057	1.83006e-210	0.190241	1.60287e-05	1818.04	1736.49	1803.76	1804.63	4350.07	4726.29	4270.11	4368.98	2018.57	2095.11	1976.11	2087.17
ENSDARG00000059911	bbs7	-4.04803	2.12622e-210	-3.23128	4.44607e-173	1209.33	1130.7	1021.38	998.229	58.0722	74.5859	68.4	62.6642	101.928	126.952	136.408	98.5204
ENSDARG00000101457	cdc42ep4a	-3.02744	2.63919e-210	-0.97214	2.95107e-29	1460.26	1522.86	1431.73	1222.03	144.416	204.875	172.954	170.483	732.815	724.187	678.43	734.159
ENSDARG00000008639	kifap3a	-4.97412	3.00816e-210	-7.81741	2.03379e-167	1473.21	1397.74	1242.34	1071.65	33.6208	49.0945	43.9714	38.7043	6.66195	7.18598	6.4956	2.18934
ENSDARG00000009689	daam1b	-2.22888	3.3098e-210	-4.0821	0	1547.68	1608.31	1670.73	1553.59	366.008	354.991	298.028	339.124	95.9321	84.6349	107.538	87.5737
ENSDARG00000037393	slc43a1a	-2.02108	3.42488e-210	-1.91875	1.57149e-198	2397.61	2554.38	2364.05	2238.02	598.297	637.285	595.08	520.666	594.246	645.94	628.63	656.803
ENSDARG00000007204	si:ch211-195b21.5	-2.82057	1.19112e-209	-5.05209	0	2462.36	2325.49	2043.88	1972.77	334.679	319.115	303.891	284.753	75.2801	59.8832	64.956	63.4909
ENSDARG00000042409	RALGDS	-3.62556	1.92011e-209	-1.24267	7.36542e-55	657.278	619.521	647.098	680.88	55.0158	69.8653	50.8114	35.0182	269.143	283.447	280.033	269.289
ENSDARG00000093019	NA	-5.11065	3.11657e-209	-2.79002	2.33237e-127	870.975	947.592	958.246	1102.43	24.4515	45.318	21.4971	21.1952	133.905	154.099	138.573	135.009
ENSDARG00000103691	NA	-3.49995	1.52739e-208	-2.36949	2.85703e-129	1044.2	1091.03	942.464	942.574	65.7133	92.5243	98.6914	100.447	186.535	213.184	186.207	191.203
ENSDARG00000030512	tsnaxip1	-5.34698	1.91533e-208	-1.98393	6.99507e-53	1435.97	1316.86	1266.01	1198.35	25.2156	58.5358	20.52	23.9598	318.441	334.547	344.989	318.914
ENSDARG00000019728	bmpr1aa	-2.44263	2.31374e-208	-2.17116	5.40322e-172	3509.8	3425.67	2913.07	2841.93	608.23	535.319	596.057	589.78	658.201	733.768	706.577	715.915
ENSDARG00000096668	MZT1	2.7995	2.64778e-208	0.828342	2.39683e-17	139.226	112.918	140.919	143.281	954.371	893.143	984.959	927.061	223.842	249.114	241.059	245.936
ENSDARG00000089863	NA	-4.08184	1.26262e-207	-6.38109	3.06098e-283	1863.37	1884.5	1553.49	1537.01	94.7494	80.2507	103.577	124.407	16.6549	21.5579	16.5999	27.0019
ENSDARG00000026801	stau2	-3.39455	2.74143e-207	-0.353987	8.33228e-05	1110.57	1008.63	869.186	969.81	78.7031	115.183	92.8285	90.3101	801.433	774.489	718.847	794.731
ENSDARG00000021107	sf3a2	1.27144	3.6855e-207	0.0174825	0.745672	1380.93	1535.07	1471.19	1450.57	3404.87	3497.99	3586.11	3616.09	1434.98	1441.19	1530.8	1504.81
ENSDARG00000011841	atp5l	2.15136	4.91551e-207	0.838133	3.04899e-31	592.522	476.085	464.468	516.284	2239.6	2441.51	2161.44	2228.26	864.721	911.821	942.584	931.2
ENSDARG00000102389	ved	7.92174	9.86692e-207	3.78517	1.107e-46	12.9513	9.15548	12.4008	10.6572	2878.39	2391.47	2976.38	2924.02	155.223	170.068	162.39	147.416
ENSDARG00000037361	kdelr2b	2.74809	2.34604e-206	1.45383	2.16825e-56	192.65	201.42	207.432	226.17	1387.62	1226.42	1459.85	1515	590.249	580.468	562.231	545.146
ENSDARG00000068130	SPACA9	-5.32863	3.46159e-206	-1.80491	8.32289e-39	1703.1	1701.39	1378.75	1424.52	22.9232	63.2564	35.1771	34.0967	433.693	481.461	422.936	435.679
ENSDARG00000014329	npm1a	1.7935	6.09185e-206	0.974163	2.00755e-61	4780.65	4490.76	4500.38	4368.29	15640.5	13788	16784.4	16663.1	8910.36	9119.01	8750.3	8849.32
ENSDARG00000009942	cdc6	2.98954	7.04629e-206	0.906606	3.55579e-19	283.31	294.501	250.271	296.035	2265.58	1839.16	2361.75	2450.35	520.965	534.158	513.153	535.659
ENSDARG00000058940	NA	-1.96582	8.48372e-206	-0.319211	3.626e-08	1597.87	1608.31	1503.88	1515.7	362.951	449.404	361.543	420.219	1245.79	1224.01	1234.89	1278.58
ENSDARG00000070339	hoxc3a	2.9933	1.36804e-205	1.31631	1.46564e-38	218.553	141.91	157.829	142.097	1322.67	1220.75	1390.47	1273.56	397.052	389.64	422.936	418.164
ENSDARG00000056204	zgc:113436	-5.13746	3.21306e-205	-2.11686	2.54517e-110	811.075	828.571	719.249	719.956	16.8104	36.8209	16.6114	17.5091	181.205	178.851	169.607	178.066
ENSDARG00000019778	rps6	1.00386	9.00847e-205	-0.308139	1.28764e-19	4762.84	4487.71	4632.28	4494.99	9189.93	8862.51	9261.35	9528.64	3726.7	3644.89	3635.37	3829.89
ENSDARG00000025383	arl2bp	-4.34881	1.03109e-204	-1.23387	3.5581e-27	1309.7	1144.43	1144.26	1058.62	42.0259	86.8596	54.72	46.0766	486.323	491.84	515.318	483.845
ENSDARG00000076066	march6	2.36373	1.52526e-204	1.33906	2.72538e-63	176.461	173.954	223.215	182.357	968.889	1002.66	951.737	1009.08	488.321	484.654	491.501	467.789
ENSDARG00000055064	prdx5	2.16216	2.0747e-203	2.97465	0	234.742	170.902	219.833	242.748	993.34	997.941	959.554	959.315	1666.15	1720.64	1733.6	1750.74
ENSDARG00000103754	aspm	-2.82943	4.19433e-203	-2.62002	3.75475e-187	1826.13	1843.3	1562.51	1425.7	219.299	233.199	245.263	237.755	279.136	265.881	267.763	267.1
ENSDARG00000076657	plagl2	-4.07164	4.50868e-203	-1.49382	6.56129e-49	919.542	987.266	843.257	793.373	42.0259	72.6977	43.9714	52.5273	333.764	314.586	312.511	294.102
ENSDARG00000036698	znf865	-3.12696	4.7696e-203	-3.94843	7.45575e-298	2153.15	2188.16	1842.09	1776.21	213.95	221.87	214.971	258.95	116.584	122.162	152.286	123.333
ENSDARG00000057830	dnmt3bb.2	-2.46941	5.58885e-203	-0.869683	6.50228e-28	5081.76	4995.84	4617.62	4634.72	834.406	1065.92	816.891	771.322	2650.79	2658.81	2628.55	2635.24
ENSDARG00000016664	rnf20	3.58544	9.57284e-203	3.60066	6.97166e-206	53.4241	67.1402	73.2777	92.3628	873.375	797.786	904.834	934.433	898.697	832.775	923.819	891.062
ENSDARG00000103953	med12	-2.70963	1.2561e-202	-1.74107	9.73686e-95	2370.09	2102.71	1904.09	1810.55	325.51	284.182	314.64	323.458	583.587	624.382	644.508	592.582
ENSDARG00000013351	cirbpb	-0.966655	2.75485e-202	-0.821303	1.55016e-147	29778.3	28856.5	27328.1	26908.4	14509.6	14395.1	14472.5	14357.5	16097.9	16069.5	15930.1	15758.2
ENSDARG00000042489	prkrira	4.48237	4.30311e-202	2.40199	9.44832e-57	59.8997	68.6661	59.7495	49.7338	1318.09	1072.53	1449.1	1460.63	293.792	332.152	307.459	319.644
ENSDARG00000001734	fkbp8	5.89102	1.49135e-201	3.45268	5.50981e-68	29.1404	27.4664	13.5282	23.6828	1439.58	1158.44	1446.17	1389.67	235.833	249.114	247.555	270.019
ENSDARG00000078691	NA	-2.5557	2.9927e-201	-0.559023	3.65112e-16	877.45	881.978	891.733	830.081	136.775	183.16	132.891	140.073	600.242	590.847	609.865	560.471
ENSDARG00000076557	bicc2	-1.29096	3.41024e-201	-0.578145	3.10453e-45	3608.55	3659.14	3654.86	3708.72	1468.62	1402.03	1623.03	1490.12	2460.93	2483.95	2359.35	2498.77
ENSDARG00000082753	NA	-1.02599	5.44979e-201	-1.32591	0	69930.5	69598.4	72449.1	72508.4	34829.6	37296.7	33564.8	34013.7	28300	27998.2	28390.8	28791.3
ENSDARG00000026664	uri1	2.41912	6.31899e-201	1.18413	6.52507e-46	174.842	184.635	171.357	164.595	963.54	907.305	930.239	904.023	393.721	400.818	410.666	369.999
ENSDARG00000063912	mt-co3	0.906015	1.62021e-200	1.17768	0	52580.6	50074.4	48922.4	48436	94937.4	89991.2	94200.4	95623.7	113516	112146	113597	113148
ENSDARG00000000103	myh10	-3.36063	2.25231e-200	-1.25042	7.80371e-47	877.45	830.097	778.998	723.509	71.062	92.5243	63.5143	84.7809	359.079	316.982	330.554	337.888
ENSDARG00000061688	arvcfb	-4.56657	3.58819e-200	-5.65466	1.0037e-216	917.923	929.281	762.088	780.347	30.5643	41.5415	33.2228	37.7828	17.9873	17.5657	18.0433	13.1361
ENSDARG00000011533	sema6dl	-2.49856	5.47829e-200	-1.11011	1.29865e-46	2124.01	2121.02	1964.97	1764.37	378.998	300.232	364.474	363.084	959.321	938.17	857.42	934.119
ENSDARG00000040443	polr2i	4.23464	1.58745e-199	3.48506	5.1934e-134	25.9026	35.096	58.6221	41.4449	745.769	792.122	787.577	836.751	469.001	471.081	466.962	472.168
ENSDARG00000059298	spcs1	2.57615	2.07559e-199	0.798907	9.09408e-19	228.267	170.902	228.852	200.119	1227.16	1339.71	1198.95	1190.62	369.738	382.454	348.597	345.186
ENSDARG00000052437	mia	3.42577	2.59938e-199	3.72732	1.19111e-239	64.7565	56.4588	60.8768	84.0738	709.856	758.133	677.16	748.284	889.371	892.659	890.619	893.251
ENSDARG00000032532	arpp19a	-1.80854	4.94744e-199	-1.03673	2.15174e-75	2091.63	2056.93	1795.87	1844.89	546.337	563.643	547.2	561.213	922.68	949.348	983.001	932.66
ENSDARG00000054318	stk33	-2.42849	5.3609e-199	-1.4553	8.53386e-91	1121.91	1123.07	1091.27	1070.46	216.243	190.713	217.903	191.679	374.402	443.135	423.658	366.35
ENSDARG00000008748	ube2na	-1.44306	7.35552e-199	0.226925	1.7491e-07	2077.06	2087.45	1865.76	1946.72	712.149	714.703	753.377	748.284	2280.39	2353.01	2373.06	2307.57
ENSDARG00000035719	arl5c	2.54517	8.58094e-199	1.14634	3.69802e-40	463.009	401.315	426.138	376.556	2396.24	2088.41	2637.31	2591.35	910.023	911.023	948.358	912.955
ENSDARG00000068122	NA	-4.81425	2.91529e-198	-1.86221	4.62664e-93	666.992	694.29	656.117	684.432	23.6873	40.5974	10.7486	20.2737	191.864	175.657	197.755	176.607
ENSDARG00000098583	wbp1	-1.57571	2.96425e-198	-0.855367	4.32454e-75	1223.9	1184.11	1208.52	1212.56	398.1	398.421	429.943	395.337	663.53	653.126	682.76	669.209
ENSDARG00000069135	NA	3.8443	3.63498e-198	1.94391	5.00167e-49	64.7565	86.977	81.1691	63.9435	1041.48	917.69	1164.75	1150.07	279.136	288.238	286.528	290.453
ENSDARG00000053884	med13a	-1.79045	4.67787e-198	-0.510777	1.02024e-22	1270.85	1207	1169.06	1193.61	352.254	350.271	356.657	337.281	887.372	799.241	871.854	829.76
ENSDARG00000009753	sf3b6	1.19008	7.9854e-198	-0.618675	3.19149e-48	1808.32	1760.9	1936.79	1811.73	4016.15	4303.33	4250.57	4161.64	1219.14	1206.45	1187.97	1159.62
ENSDARG00000089681	btf3l4	2.66903	1.7224e-197	1.33582	4.89308e-49	289.785	271.612	368.643	389.582	2125.75	1976.06	2183.91	2193.25	829.413	886.271	848.037	801.299
ENSDARG00000032102	prdx3	3.08957	6.23781e-197	-2.71808	6.05527e-53	100.373	109.866	117.244	142.097	1065.93	991.332	1005.48	979.588	17.3211	12.7751	18.0433	23.353
ENSDARG00000003382	NA	3.76637	6.35102e-197	2.87377	7.86365e-113	38.8539	39.6737	75.5324	54.4704	712.913	752.468	754.354	732.618	397.719	406.407	395.51	389.703
ENSDARG00000002991	cep135	-3.81389	1.56876e-196	-1.82915	4.18985e-105	579.57	581.373	559.165	550.624	38.9695	52.871	37.1314	32.2536	151.893	164.479	165.277	156.903
ENSDARG00000023323	ywhaqb	1.11276	2.43388e-196	1.1281	3.12504e-205	1842.32	1637.3	1785.72	1798.71	3776.22	3729.3	3866.55	3917.43	3813.97	3967.46	3859.83	3812.37
ENSDARG00000103929	ildr1a	-1.85188	6.71175e-196	-1.21588	2.66328e-103	1280.56	1184.11	1175.82	1104.8	335.443	319.115	328.32	327.144	510.306	518.189	513.874	495.521
ENSDARG00000101331	tekt1	-4.05614	2.77304e-195	-1.56802	1.8082e-69	597.378	625.624	660.626	616.936	36.6772	47.2063	29.3143	36.8613	205.188	186.037	228.068	224.043
ENSDARG00000090788	cstf2	2.23453	4.89033e-195	1.72307	1.58126e-115	372.35	361.641	331.441	361.162	1686.39	1522.87	1660.16	1827.4	1117.21	1228	1134.57	1220.19
ENSDARG00000104114	setd8b	-1.6554	1.34029e-194	-1.3348	9.79606e-146	1322.65	1315.34	1272.78	1238.61	405.741	383.315	414.308	428.512	520.965	521.383	508.1	487.493
ENSDARG00000015978	COX5B (1 of many)	1.24843	2.62849e-194	1.02735	1.46974e-132	1308.08	1246.67	1286.3	1252.82	3031.22	2933.4	2918.72	3213.38	2601.49	2623.68	2544.83	2610.43
ENSDARG00000056210	si:ch211-199o1.2	8.33546	2.98298e-194	-0.704325	0.0742946	19.4269	9.15548	10.1461	4.73655	3572.97	2737.02	3575.36	3703.64	7.32815	4.79065	7.21734	5.83824
ENSDARG00000032049	enah	4.19619	4.06341e-194	0.31399	0.0476805	119.799	90.0289	129.645	117.23	2181.53	1680.54	2265.99	2309.36	155.89	162.084	121.251	132.09
ENSDARG00000001220	mycbp2	-4.72008	5.52607e-194	-1.35177	4.69967e-60	623.281	646.987	600.877	594.438	19.8668	37.765	13.68	22.1168	249.823	252.308	231.677	230.611
ENSDARG00000075222	amer2	-4.24286	7.59932e-194	0.965119	1.85142e-40	597.378	560.01	574.948	548.256	24.4515	50.0387	19.5428	26.7244	1156.51	1144.97	1105.7	1040.67
ENSDARG00000038156	dusp11	-3.65835	1.1555e-193	-5.26156	6.86394e-270	1295.13	1289.4	1136.37	1030.2	93.2212	92.5243	86.9657	102.29	31.3112	21.5579	28.1476	41.5975
ENSDARG00000098334	exosc3	2.58415	8.40627e-193	2.09054	3.91016e-125	142.464	115.969	116.117	138.544	764.872	774.183	748.491	781.459	557.605	530.964	538.413	551.714
ENSDARG00000056381	cfap97	-3.22301	8.67795e-193	-2.66241	1.08362e-170	709.083	755.327	719.249	721.14	67.2415	79.3066	72.3085	93.0747	125.245	111.782	97.434	123.333
ENSDARG00000077301	mlf1	7.91517	1.11134e-192	5.92694	5.9022e-108	21.0459	10.6814	9.01879	5.92069	2805.04	2177.15	2948.04	2957.2	666.861	720.993	653.169	702.049
ENSDARG00000062790	NA	-3.09921	1.37311e-192	-3.27037	1.17245e-217	2245.43	2186.63	1862.38	1785.68	255.976	243.584	236.468	203.659	235.167	200.409	215.077	183.905
ENSDARG00000062485	dock11	-4.97962	1.70317e-191	-3.8858	1.21773e-180	1010.2	965.903	820.71	836.002	26.7438	39.6533	21.4971	26.7244	48.6323	69.4645	66.3995	61.3016
ENSDARG00000070343	hoxc6a	4.93406	1.8828e-191	3.0239	2.24342e-70	22.6648	36.6219	28.1837	44.9973	1043.77	888.422	1127.62	1063.45	256.485	281.85	275.702	283.155
ENSDARG00000032606	sept8a	-3.09481	2.59747e-191	-3.4162	9.67322e-232	1233.61	1110.86	1113.82	1084.67	119.965	156.725	137.777	117.956	119.915	86.2318	114.034	102.899
ENSDARG00000021112	c1d	1.88488	3.09776e-191	1.02998	1.67008e-56	582.808	573.743	480.251	523.389	1920.2	2024.21	2087.18	1904.81	1072.57	1158.54	1102.81	1053.8
ENSDARG00000020822	ift22	-4.25183	1.11411e-190	-0.670463	1.54622e-09	861.261	933.859	962.756	994.676	38.9695	78.3624	37.1314	43.312	605.571	549.328	630.795	572.878
ENSDARG00000000068	slc9a3r1	3.90128	1.11411e-190	3.05295	5.96993e-116	59.8997	61.0365	89.0606	88.8104	1156.86	947.902	1203.84	1258.81	633.552	639.552	640.178	623.233
ENSDARG00000053129	carhsp1	1.7327	6.30644e-190	1.71999	7.30097e-190	480.817	491.344	507.307	517.469	1668.05	1566.3	1644.53	1774.87	1627.52	1578.52	1676.59	1712.79
ENSDARG00000068996	hist2h2l	-2.40517	7.34329e-190	-1.13728	2.13415e-63	775.459	781.267	792.526	717.588	129.134	152.948	143.64	154.817	341.758	365.687	334.884	351.754
ENSDARG00000055648	cpda	-3.49904	1.41508e-189	-1.68785	9.62626e-51	2528.74	2542.17	2499.33	2544.71	194.848	310.617	200.314	188.914	753.467	836.768	806.176	741.457
ENSDARG00000061052	nipblb	-1.65451	2.00405e-189	-1.13774	1.08374e-104	1448.93	1414.52	1428.35	1469.52	460.757	496.61	420.171	451.551	618.895	683.467	657.499	661.181
ENSDARG00000069499	spag1b	-2.60039	2.08403e-189	-1.40467	5.65184e-74	934.112	903.34	905.261	1081.12	149.765	146.339	171.977	164.033	359.079	372.074	344.989	369.999
ENSDARG00000020158	NA	-1.77727	4.29729e-189	-0.654158	3.75568e-30	2418.65	2378.9	2342.63	2221.44	637.266	624.067	698.657	771.322	1486.28	1475.52	1457.9	1524.51
ENSDARG00000004160	reep3b	-1.72668	6.26799e-189	-0.07448	0.19305	1686.91	1608.31	1525.3	1463.6	440.89	509.828	472.937	473.667	1466.96	1530.61	1481.72	1475.62
ENSDARG00000039082	zgc:123010	-2.2083	1.06065e-188	-4.40907	0	953.539	921.651	868.059	897.577	200.196	199.211	195.428	190.757	35.9745	45.5112	44.7475	45.2464
ENSDARG00000073696	frmd8	-2.00661	1.3721e-188	0.211313	0.000122501	862.88	811.786	882.714	865.605	197.904	208.652	235.491	213.795	952.659	993.262	1024.14	999.799
ENSDARG00000045660	hic1l	-3.21767	1.60395e-188	-2.38883	1.38011e-142	802.98	688.187	715.866	704.562	71.8262	93.4685	65.4685	82.0163	131.24	150.906	133.521	140.118
ENSDARG00000096661	si:ch211-286b5.5	1.1703	2.43222e-188	-0.757658	1.95187e-67	1516.92	1478.61	1406.93	1506.22	3307.06	3294.05	3377.98	3302.77	849.399	895.054	917.323	829.76
ENSDARG00000006062	akap1b	-4.02855	2.95672e-188	-0.331213	0.000196837	652.421	645.461	606.514	603.911	34.3849	63.2564	31.2686	24.8814	487.655	483.058	517.483	502.089
ENSDARG00000069878	snu13a	2.39427	5.28077e-188	1.43933	1.20613e-66	250.931	254.827	217.578	230.907	1274.53	1158.44	1332.82	1222.87	632.219	686.66	594.709	661.181
ENSDARG00000027734	srsf5b	-2.37145	5.75781e-188	-3.24328	0	3956.62	3738.49	3185.89	3103.63	665.538	712.815	659.571	660.738	363.076	364.888	352.928	393.352
ENSDARG00000009653	lhfpl2a	-3.37697	7.28965e-188	0.155327	0.102388	790.029	888.081	801.545	808.767	54.2517	106.686	81.1028	77.4087	891.369	912.62	897.837	958.932
ENSDARG00000036820	mgll	2.22576	8.35501e-188	-0.681648	1.51909e-15	433.868	370.797	378.789	344.584	1778.08	1865.59	1742.24	1732.48	251.156	205.2	231.677	258.342
ENSDARG00000102294	fbxo11a	-3.17378	1.15289e-187	-2.92155	1.24881e-173	1427.88	1493.87	1285.18	1257.56	124.55	180.328	153.411	148.367	162.552	201.207	169.607	187.554
ENSDARG00000034178	cpsf1	-1.8295	2.14721e-187	-1.27678	4.49779e-104	1670.72	1719.7	1512.9	1533.46	441.654	473.951	463.165	429.434	651.539	706.621	645.23	648.775
ENSDARG00000045748	stab2	-3.02639	3.33024e-187	-3.4003	3.27012e-231	919.542	958.273	906.388	801.662	95.5135	123.68	103.577	117.956	87.2716	79.8442	93.1036	78.0865
ENSDARG00000060430	zfyve28	-3.67185	5.00476e-187	-1.26795	4.74649e-33	1241.71	1138.33	944.718	916.523	77.1749	97.245	82.08	75.5656	444.352	429.562	414.997	467.06
ENSDARG00000103720	zgc:162730	4.16988	1.44433e-186	1.39435	1.57527e-19	45.3295	30.5183	48.476	41.4449	759.523	726.977	737.742	798.968	109.256	108.588	117.643	105.818
ENSDARG00000053990	hmgb2b	1.35329	1.49407e-186	1.46178	6.85e-219	2656.63	2862.61	3109.23	3121.39	7355.3	7824.91	7369.61	7536.29	8101.6	8156.09	8160.64	8015.91
ENSDARG00000104566	foxi1	4.07238	5.01217e-186	2.17115	4.12193e-51	76.0889	47.3033	43.9666	50.918	874.14	802.507	975.188	958.393	239.164	229.951	251.885	244.476
ENSDARG00000099609	tpbga	-2.4095	7.48016e-186	-1.91166	1.9288e-147	736.605	769.06	768.852	729.429	136.011	141.619	148.526	140.073	183.204	213.184	212.19	191.203
ENSDARG00000095921	NA	1.41991	1.105e-185	0.717558	2.34021e-47	1032.87	961.325	1099.17	1110.72	2950.99	2826.71	2741.86	2763.67	1752.09	1765.36	1755.98	1663.9
ENSDARG00000021113	ptmaa	1.72153	1.8448e-185	0.455092	5.34281e-14	2519.03	2272.08	2090.1	2140.92	7434.01	6836.41	7777.08	7659.77	3173.09	3066.02	3102.73	3004.51
ENSDARG00000100960	NA	-2.47073	1.9905e-185	-0.29583	9.63898e-05	1191.52	1292.45	1173.57	1198.35	187.206	252.082	212.04	226.697	951.327	1030.79	1057.34	914.415
ENSDARG00000042742	stx6	-2.10041	4.75314e-185	-0.662399	2.93496e-25	1164	1225.31	1101.42	1066.91	254.448	274.741	272.623	259.872	659.533	754.528	736.168	725.402
ENSDARG00000028581	jkamp	-2.51656	6.07137e-185	-0.34579	4.47113e-07	757.651	679.031	723.758	769.69	118.437	129.345	151.457	115.191	576.925	549.328	588.935	591.122
ENSDARG00000025403	ftr83	4.18085	6.51962e-185	-1.74015	7.83009e-15	48.5674	25.9405	47.3486	50.918	787.795	821.389	759.24	817.399	13.9901	12.7751	12.2695	13.1361
ENSDARG00000079626	elf2b	3.38419	1.11605e-184	0.175401	0.201831	116.562	131.228	154.447	159.859	1468.62	1248.13	1663.1	1557.39	160.553	165.278	153.729	162.011
ENSDARG00000039943	fam46ba	2.81908	1.50677e-184	-1.66199	2.56681e-52	488.911	596.632	463.34	399.055	3410.21	3176.98	3601.75	3512.88	161.219	156.495	135.686	159.092
ENSDARG00000040884	mxi1	-2.97275	3.53189e-184	-3.2714	8.08287e-223	1743.57	1637.3	1481.34	1635.3	218.535	252.082	172.954	181.542	175.876	151.704	171.773	171.498
ENSDARG00000006766	snd1	1.98356	1.44291e-183	0.509906	1.36276e-12	393.396	483.714	452.067	446.42	1789.54	1603.13	1837.03	1806.2	658.867	602.824	636.569	633.45
ENSDARG00000019135	NA	-3.40586	2.17691e-183	-3.05004	9.47054e-171	1063.63	967.429	875.95	878.631	88.6365	91.5802	100.646	75.5656	132.573	111.782	98.8775	111.656
ENSDARG00000054749	lmo4b	2.7331	2.51929e-183	3.06188	1.9245e-234	124.656	114.443	157.829	138.544	858.093	963.952	953.691	836.751	1101.89	1144.17	1172.1	1115.83
ENSDARG00000095273	cox8a	2.50055	6.49705e-183	1.0811	2.26846e-33	215.315	181.584	246.889	230.907	1263.83	1318.94	1186.25	1224.72	484.99	417.585	474.901	487.493
ENSDARG00000045618	clta	2.56675	9.17128e-183	1.79054	1.12793e-88	395.014	366.219	367.516	416.817	2350.4	1891.08	2445.79	2478.92	1339.72	1323.02	1350.36	1338.42
ENSDARG00000071881	arl9	-7.25051	5.46986e-182	-2.05494	4.61826e-85	1426.26	1469.45	1242.34	1149.8	3.05643	21.7149	6.84	3.68613	318.441	308.997	325.502	316.725
ENSDARG00000020334	ptpn11a	1.82264	6.66707e-182	0.94589	3.91541e-48	364.255	405.893	454.322	444.052	1510.64	1502.1	1435.42	1500.25	829.413	835.171	758.542	817.354
ENSDARG00000075673	arhgap21b	-2.69059	1.03045e-181	0.605765	1.74423e-18	689.656	697.342	643.716	691.537	93.9853	141.619	96.7371	90.3101	1039.26	1028.39	1034.97	1034.83
ENSDARG00000102320	mob1a	-1.3522	1.84124e-181	-0.958685	3.05308e-102	2057.64	2050.83	1928.89	2004.75	787.031	822.334	785.622	751.049	1001.96	1088.28	1041.46	1003.45
ENSDARG00000045153	slc16a8	-2.81541	2.04453e-181	-6.02437	1.66878e-232	937.35	889.607	838.748	814.687	116.144	135.954	127.029	115.191	15.3225	14.372	16.5999	6.56803
ENSDARG00000052712	suclg1	5.13037	2.28424e-181	3.79036	4.59724e-98	21.0459	19.8369	39.4572	31.9717	1089.62	862.931	1047.5	1104	385.727	416.787	425.101	394.082
ENSDARG00000071345	mgst2	2.43653	1.21647e-180	0.845614	1.09314e-20	165.129	125.125	169.102	139.728	794.672	827.054	817.868	818.32	272.474	265.083	274.259	268.559
ENSDARG00000054290	acin1a	-0.96392	2.17943e-180	-0.117215	0.000221946	2839.57	2732.91	2835.28	2921.27	1428.12	1493.61	1432.49	1461.55	2606.82	2626.88	2582.36	2639.62
ENSDARG00000030824	esyt2a	-3.30262	6.2966e-180	-0.755977	2.6185e-21	574.714	605.787	540	532.862	48.9029	68.9212	59.6057	51.6058	322.439	353.71	317.563	337.888
ENSDARG00000098355	atp5h	1.84697	7.80287e-180	-0.153175	0.0367207	469.484	408.945	462.213	470.103	1624.49	1537.04	1709.02	1658.76	407.711	441.539	390.458	393.352
ENSDARG00000063229	xpo1b	1.86752	9.25616e-180	1.29511	1.45059e-85	327.02	337.227	355.115	350.505	1285.99	1183.93	1329.89	1216.42	823.417	821.597	872.576	856.033
ENSDARG00000070453	gch1	-1.78201	1.0644e-179	0.0288111	0.663389	1403.6	1428.25	1296.45	1380.71	398.864	418.248	411.377	371.377	1394.35	1449.97	1464.4	1304.12
ENSDARG00000036427	slc3a2a	1.41669	1.70638e-179	3.14027	0	543.954	547.803	503.925	525.758	1405.19	1351.99	1486.23	1402.57	4642.05	4736.36	4620.54	4643.59
ENSDARG00000042004	nfya	3.7864	1.78315e-179	2.71044	8.86441e-91	72.851	68.6661	73.2777	62.7593	1023.14	788.345	982.028	1036.72	450.348	451.12	469.127	446.626
ENSDARG00000104811	cyp2aa2	-2.12182	2.03156e-179	-1.15886	6.20749e-71	929.255	927.755	912.025	880.999	187.206	225.646	215.948	211.952	429.696	373.671	414.997	412.326
ENSDARG00000037153	atp6ap1b	-4.57045	3.38086e-179	-1.34136	6.33308e-20	2386.28	2365.16	2199.46	2081.72	66.4774	148.228	76.2171	89.3886	915.352	860.721	923.097	861.141
ENSDARG00000041394	dnajb1b	8.2311	9.65451e-179	5.87372	4.96544e-91	4.85674	6.10365	11.2735	11.8414	2752.32	2278.18	3028.16	3005.12	542.283	558.91	522.535	534.199
ENSDARG00000025789	chd4b	-3.61482	1.22276e-178	0.201015	0.117878	3169.83	2906.86	2804.84	2656.02	205.545	329.5	220.834	185.228	3243.04	3332.7	3339.46	3344.58
ENSDARG00000044774	pou5f3	1.26715	1.48747e-178	0.295207	1.60169e-10	1233.61	1231.41	1194.99	1197.16	2800.46	2890.91	3003.74	2988.53	1460.97	1411.65	1532.24	1547.13
ENSDARG00000010680	gngt2a	3.43588	1.47864e-177	3.00767	9.31508e-136	46.9484	67.1402	83.4238	74.6007	810.719	787.401	695.725	721.559	544.282	562.902	584.604	551.714
ENSDARG00000004636	ccdc9	-4.30431	1.74543e-177	-3.29407	2.21894e-158	764.126	735.49	673.027	634.698	31.3284	47.2063	28.3371	35.0182	79.9434	78.2473	64.2343	62.7611
ENSDARG00000104251	prdm10	-4.34263	4.86709e-177	-2.89755	1.10623e-125	765.745	865.193	697.829	743.639	29.8002	53.8152	38.1086	30.4106	103.926	108.588	88.7732	110.197
ENSDARG00000037870	actb2	1.35412	1.8407e-176	0.246831	4.16814e-07	18000.7	17538.8	16519	16411	43648.9	39815.7	45552.4	45999.2	20352.3	20310.8	20060.6	20506.1
ENSDARG00000059843	fam135a	-3.23994	3.61445e-176	-0.0877711	0.359167	736.605	680.557	649.353	647.724	65.7133	98.1891	54.72	68.1934	632.219	668.296	648.839	599.88
ENSDARG00000061963	vrtn	-1.13389	5.44359e-176	-1.1083	2.16976e-174	3708.93	3799.52	3481.25	3492.02	1624.49	1639	1716.84	1611.76	1653.5	1643.19	1710.51	1699.66
ENSDARG00000044874	zgc:92107	-1.53946	5.6095e-176	-1.28307	6.43876e-126	5909.03	5763.37	5256.83	5252.84	1979.8	1775.9	1948.42	1917.71	2191.78	2396.13	2326.15	2195.18
ENSDARG00000077341	ppp1r14c	3.39886	1.33117e-175	-0.741874	1.12674e-07	145.702	137.332	122.881	131.439	1369.28	1169.77	1558.54	1550.94	81.2758	84.6349	75.782	78.0865
ENSDARG00000056279	NA	-4.44925	1.96651e-175	-0.922365	6.41162e-19	697.751	698.868	621.169	653.645	28.272	52.871	18.5657	22.1168	367.74	348.919	359.423	330.591
ENSDARG00000075855	adgre10	4.46274	2.2452e-175	1.24828	1.6978e-14	108.467	129.703	201.795	174.068	3451.48	4285.39	2939.24	3066.86	350.419	400.818	364.475	361.971
ENSDARG00000099745	baz1a	-4.47915	2.27e-175	-2.07773	1.33804e-85	722.035	614.943	626.806	568.387	21.395	33.9885	23.4514	35.0182	152.559	136.534	155.173	153.254
ENSDARG00000069431	slc26a4	-1.52196	2.74486e-175	-1.20494	4.20062e-112	10367.5	10231.2	9625.3	9488.5	3398.75	3108.06	3764.93	3552.51	4332.27	4341.93	4324.63	4221.05
ENSDARG00000010408	igsf9b	-2.29588	3.26317e-175	0.272824	1.006e-05	725.272	674.453	650.48	646.54	135.247	131.233	153.411	128.093	844.736	779.28	812.672	809.327
ENSDARG00000015638	gemin2	3.49328	5.08734e-175	2.08588	1.13485e-60	61.5186	70.192	81.1691	74.6007	850.452	732.642	842.297	853.339	309.115	300.214	284.363	342.267
ENSDARG00000012763	arl13b	-2.99701	5.6408e-175	-2.86297	8.57989e-182	717.178	749.223	719.249	644.171	100.098	90.6361	70.3542	90.3101	98.5969	89.4255	98.8775	100.71
ENSDARG00000028523	inip	2.38672	8.71655e-175	1.74754	2.16544e-92	144.083	138.858	181.503	168.148	832.114	805.339	835.457	880.985	530.958	538.15	520.37	564.12
ENSDARG00000024109	naa40	3.92342	1.05596e-174	1.55363	9.31003e-27	67.9943	54.9329	99.2067	71.0483	1169.85	946.014	1214.59	1205.36	215.847	213.184	221.572	226.232
ENSDARG00000061732	raph1b	-3.9697	1.07384e-174	-2.04182	1.41501e-65	1134.86	1066.61	945.846	930.733	61.8927	53.8152	62.5371	81.0948	297.123	217.975	248.998	222.583
ENSDARG00000038608	sdhc	2.32607	1.9165e-174	1.66136	7.64558e-88	148.94	210.576	224.342	188.278	993.34	1002.66	919.491	996.176	608.236	638.754	605.535	616.665
ENSDARG00000019856	atp1a1b	-2.46981	3.46168e-174	-0.942932	2.70779e-33	1309.7	1161.22	1060.84	1062.17	221.591	212.428	200.314	190.757	559.604	614.002	622.134	588.203
ENSDARG00000017602	ccng2	-2.78163	1.87056e-173	-0.884755	2.0205e-31	629.757	663.772	569.311	584.964	79.4672	96.3008	89.8971	90.3101	320.44	324.966	347.876	327.671
ENSDARG00000099768	NA	-5.13254	2.9856e-173	-4.51539	1.37814e-174	1053.91	1086.45	918.789	923.628	13.7539	40.5974	29.3143	31.3321	39.3055	53.4956	40.4171	40.8677
ENSDARG00000038097	pigq	-2.71808	1.2004e-172	-1.39158	7.86465e-70	681.562	610.365	652.735	629.962	94.7494	103.854	102.6	90.3101	243.161	222.765	269.207	244.476
ENSDARG00000094627	NA	-2.92152	1.9843e-172	-0.976013	3.55627e-26	1131.62	1107.81	1128.48	1087.04	152.057	194.49	123.12	117.035	564.934	576.475	562.952	559.742
ENSDARG00000069439	ptgdsa	2.21656	2.10188e-172	2.09285	2.07132e-155	181.318	181.584	173.612	162.227	809.19	757.189	829.594	838.594	721.489	747.342	753.49	747.295
ENSDARG00000005162	NA	1.008	2.84818e-172	0.5428	3.08394e-50	1704.71	1628.15	1585.05	1675.56	3292.54	3341.26	3258.77	3351.61	2446.94	2445.63	2399.04	2301.73
ENSDARG00000016260	fxr2	-1.52348	3.7767e-172	-0.892268	2.00322e-67	1923.27	1884.5	1937.91	1886.33	596.004	713.759	659.571	691.149	1033.94	1001.25	1003.93	1072.05
ENSDARG00000041072	mier1a	-3.27179	6.1447e-172	-1.68995	1.76311e-57	1335.6	1454.19	1128.48	1186.51	132.955	164.278	115.303	114.27	384.395	431.159	390.458	373.648
ENSDARG00000063690	nrm	-4.98728	6.33553e-172	-3.41099	1.89175e-95	2679.3	2375.85	1962.71	1921.86	46.6106	98.1891	84.0342	53.4489	211.184	198.812	223.737	203.609
ENSDARG00000077950	tor1	-2.42576	8.26927e-172	-0.69167	4.09397e-19	1168.85	1170.38	1139.75	1123.75	194.848	273.796	194.451	194.443	712.163	709.017	730.394	696.211
ENSDARG00000036239	gatm	3.0123	2.29244e-171	3.85447	1.1176e-284	160.272	166.324	158.956	136.176	1271.48	1485.11	1128.6	1118.74	2271.06	2235.64	2194.79	2271.81
ENSDARG00000088178	tp53inp2	2.48544	2.67071e-171	2.74933	2.75804e-215	119.799	120.547	110.48	133.808	682.348	669.385	685.954	678.247	795.437	817.605	798.959	850.194
ENSDARG00000079352	sap130b	-2.61549	3.24207e-171	-0.593173	2.26638e-17	561.762	564.588	579.457	592.069	98.5699	92.5243	104.554	79.2517	382.396	362.493	376.745	402.839
ENSDARG00000008480	trmt61a	4.51368	3.69361e-171	1.07637	1.0893e-09	33.9971	36.6219	42.8393	40.2607	914.637	779.848	893.108	974.059	80.6096	70.2629	95.2688	81.7354
ENSDARG00000068503	gbgt1l4	2.24165	4.72193e-171	-0.694034	2.72273e-13	252.55	202.946	227.724	202.488	1090.38	1006.44	1056.29	1020.14	138.569	142.921	123.416	140.848
ENSDARG00000023591	nrbf2b	-5.87812	5.35707e-171	-0.328214	2.63569e-06	681.562	718.705	658.372	658.381	8.40519	24.5473	7.81714	5.52919	522.297	533.359	534.083	570.688
ENSDARG00000104031	NA	1.9961	1.00885e-170	0.517888	1.49298e-11	288.166	245.672	218.706	241.564	956.663	1006.44	980.074	986.039	346.422	352.113	358.702	352.484
ENSDARG00000069920	cox17	2.41871	1.91215e-170	0.390963	4.6198e-05	166.748	169.376	176.994	145.649	917.694	835.551	878.451	885.592	233.835	205.2	207.138	215.285
ENSDARG00000007294	aco2	-2.20033	2.30802e-170	-1.47446	6.44622e-99	794.886	790.423	780.125	794.557	160.463	195.434	162.206	170.483	273.806	264.284	297.354	300.67
ENSDARG00000057016	cdc14ab	-3.0271	3.08277e-170	-2.06317	3.83378e-90	1911.93	1715.13	1465.55	1391.36	217.771	188.825	192.497	192.6	413.041	360.896	369.528	403.569
ENSDARG00000006242	ptp4a1	1.78831	3.38225e-170	-0.106767	0.128688	3156.88	3189.16	2957.04	2818.25	10505.7	9119.31	11313.4	10909.1	2795.36	2825.69	2822.7	2804.55
ENSDARG00000070404	fam212ab	1.98188	9.75669e-170	0.624001	7.18338e-17	352.923	314.338	320.167	355.242	1302.8	1233.97	1387.54	1380.45	551.61	510.205	513.153	492.602
ENSDARG00000077093	scaf4a	-2.6665	1.76308e-169	-1.63409	6.22281e-77	1251.42	1272.61	1110.44	1102.43	166.576	232.255	177.84	169.562	371.071	389.64	386.849	375.837
ENSDARG00000028401	rhogc	-2.60829	1.93706e-169	0.300757	7.7691e-05	760.889	810.26	729.395	782.716	107.739	166.166	120.189	113.348	938.003	962.921	946.915	947.255
ENSDARG00000056665	nsun2	-3.22555	1.41826e-168	-0.72919	8.61248e-16	760.889	686.661	652.735	619.304	74.1185	85.9154	73.2857	56.2134	389.724	392.035	444.588	409.407
ENSDARG00000016084	spsb4a	5.0821	1.70233e-168	5.33432	1.72758e-186	8.09456	25.9405	21.4196	29.6035	723.61	747.748	745.56	782.381	894.7	919.806	884.124	872.088
ENSDARG00000100223	gpa33a	1.80831	1.71992e-168	0.627383	9.18071e-21	772.221	798.052	762.088	687.985	2663.68	2366.92	2657.83	2870.57	1170.51	1164.13	1164.88	1157.43
ENSDARG00000045006	ptprga	-4.3199	4.6549e-168	-0.267354	0.00412411	521.29	569.165	500.543	582.596	20.6309	41.5415	22.4743	24.8814	445.685	465.492	479.231	415.245
ENSDARG00000027590	sept2	-1.35874	5.039e-168	-2.75912	0	6075.78	5899.18	5560.08	5325.07	2218.97	2125.23	2290.42	2271.58	801.433	851.14	882.68	839.248
ENSDARG00000044562	NA	1.04211	7.22266e-168	-0.291951	1.84837e-13	2120.77	2084.4	2170.15	2059.22	4421.13	4120.16	4416.68	4413.22	1777.41	1735.81	1706.9	1669.74
ENSDARG00000018898	zfand5a	-1.02955	8.17913e-168	-0.149283	6.44312e-05	8965.53	9179.89	8770.77	8902.35	4272.89	4115.44	4575.96	4580.94	7901.74	8235.93	8027.12	8127.57
ENSDARG00000052271	slc22a18	-2.54714	9.07489e-168	-1.19311	4.60398e-43	1894.13	1889.08	1663.97	1609.24	283.484	251.137	314.64	356.633	746.805	768.9	786.69	779.406
ENSDARG00000093658	tm7sf3	-4.56541	1.08059e-167	-1.29081	4.01891e-35	671.848	683.609	578.33	522.205	22.9232	33.0444	25.4057	22.1168	245.826	249.912	261.268	243.017
ENSDARG00000076532	NA	1.62687	1.4745e-167	0.719448	9.25352e-34	13747.8	13257.1	12620.7	12492.7	40322.7	35184.7	42755.8	42701	21339.6	21975.5	21096.3	21396.4
ENSDARG00000079150	NA	3.80785	2.39238e-167	4.05007	1.91384e-191	46.9484	42.7256	39.4572	46.1814	616.635	567.42	648.822	618.348	721.489	732.172	697.916	748.025
ENSDARG00000077855	znrf2a	1.91332	2.46839e-167	3.31961	0	284.928	360.115	348.351	415.633	1306.62	1402.03	1285.92	1359.26	3511.52	3628.92	3542.99	3507.33
ENSDARG00000059855	wdr66	-2.23819	2.66173e-167	-2.40765	1.9495e-198	1235.23	1152.06	1118.33	1068.09	233.053	217.149	268.714	249.735	210.518	234.742	197.033	218.934
ENSDARG00000070447	slc39a9	-2.51109	4.29902e-167	-0.855233	2.07702e-24	1533.11	1577.79	1377.62	1254	228.468	295.511	240.377	242.363	790.774	815.21	776.585	785.974
ENSDARG00000014571	ctnnb1	3.88101	1.02229e-166	4.08655	4.49728e-185	189.413	187.687	201.795	149.201	2719.46	1932.63	2990.06	3100.95	3019.2	3147.46	2923.02	3300.07
ENSDARG00000091061	slc38a3b	-2.58189	4.66913e-166	-2.43889	9.31259e-153	3268.58	2946.54	2573.74	2603.92	414.911	538.152	468.051	481.04	554.274	530.964	527.587	484.574
ENSDARG00000019426	trioa	-4.84662	5.47649e-166	-2.48691	1.31467e-83	820.788	857.563	714.739	689.169	25.2156	43.4298	18.5657	19.3522	127.243	152.502	138.573	130.631
ENSDARG00000025566	slc25a3b	1.2721	9.15002e-166	1.11561	2.99646e-128	1984.79	2075.24	2182.55	2207.23	5095.84	4843.37	5047.92	5457.31	4529.46	4567.09	4503.62	4743.57
ENSDARG00000069361	spa17	-4.59934	3.80937e-165	-1.27626	1.46219e-17	1730.62	1716.65	1679.75	1550.04	71.8262	102.91	34.2	64.5072	680.852	653.924	716.682	702.049
ENSDARG00000008238	manba	-5.02239	4.42163e-165	-2.80724	3.86795e-112	804.599	706.498	669.645	595.622	24.4515	25.4914	20.52	13.823	97.9307	88.6271	98.8775	109.467
ENSDARG00000089698	NA	-3.9338	4.84072e-165	-0.332788	0.000325461	500.244	579.847	537.745	516.284	37.4413	38.7092	21.4971	40.5474	408.378	472.678	393.345	421.083
ENSDARG00000045444	fzd8a	-5.28144	5.32564e-165	-3.20756	8.80417e-163	688.037	625.624	594.113	613.384	16.8104	26.4355	8.79428	11.9799	75.2801	71.8598	63.5126	61.3016
ENSDARG00000076962	gdpd5b	-3.48684	1.01505e-164	-0.559584	2.42916e-09	675.086	653.091	578.33	541.151	42.79	61.3682	63.5143	51.6058	410.376	388.841	417.884	437.139
ENSDARG00000052182	rbfox2	2.75861	1.25856e-164	1.83374	9.9757e-72	110.086	135.806	178.121	170.516	1032.31	962.064	1039.68	1066.21	509.639	585.258	531.196	534.929
ENSDARG00000057484	srsf2a	1.43445	2.52706e-164	1.0493	2.17916e-88	3158.5	3079.29	3240	3201.91	8643.59	7594.55	8912.52	9136.07	6556.03	6535.25	6607.47	6554.16
ENSDARG00000068708	ifrd1	3.6547	3.05435e-164	2.51549	1.97955e-76	71.2321	65.6142	47.3486	61.5752	777.862	653.335	799.302	822.928	347.088	349.718	344.267	345.186
ENSDARG00000058220	tada3l	3.80877	4.2781e-164	0.695395	4.20193e-06	71.2321	83.9252	82.2965	86.4421	1216.46	917.69	1230.22	1204.44	120.581	123.759	134.964	148.145
ENSDARG00000075542	zfhx4	-3.1805	5.03839e-164	-4.83062	0	2379.8	2491.82	1870.27	1779.76	230.761	243.584	221.811	241.441	77.2786	76.6505	77.9472	66.41
ENSDARG00000099164	NA	-3.89163	6.12128e-164	-0.578728	3.48778e-07	866.118	775.164	802.672	802.846	44.3183	85.9154	42.9943	46.0766	577.591	538.949	557.9	497.71
ENSDARG00000086309	erlec1	3.96244	1.17104e-163	3.73663	7.6763e-146	29.1404	33.5701	58.6221	46.1814	685.405	674.106	721.131	634.935	605.571	612.405	531.918	572.148
ENSDARG00000057227	NA	-4.20181	1.27636e-163	-0.444088	5.5346e-07	513.195	502.025	530.981	458.262	16.8104	39.6533	24.4286	29.489	370.405	384.849	373.858	343.727
ENSDARG00000014554	ppp1r3cb	5.03665	1.2983e-163	5.37551	2.63211e-187	25.9026	28.9923	24.8017	13.0255	707.564	710.927	786.6	795.282	972.645	915.813	982.28	919.524
ENSDARG00000001807	tnfrsf21	-4.42884	3.81269e-163	-5.93077	2.76601e-236	2349.04	2238.51	1926.64	1923.04	77.1749	142.563	86.9657	84.7809	27.314	31.1393	40.4171	38.6784
ENSDARG00000032237	anapc4	-4.40212	6.60241e-163	-4.11805	1.10091e-175	749.556	666.824	626.806	622.857	25.2156	45.318	25.4057	30.4106	41.9703	31.1393	37.5302	41.5975
ENSDARG00000058868	apc	-2.09253	7.35398e-163	-2.76738	1.0553e-259	1057.15	1153.59	1072.11	1001.78	255.212	228.478	265.783	253.421	166.549	154.898	165.999	140.118
ENSDARG00000101072	cnot6b	-3.28348	8.41291e-163	-4.30527	2.0234e-236	1299.99	1164.27	1006.72	1027.83	121.493	109.519	125.074	104.133	69.2843	53.4956	55.5735	47.4357
ENSDARG00000035264	riok2	7.17256	1.78763e-162	5.58112	2.76696e-98	14.5702	12.2073	10.1461	10.6572	1765.09	1327.44	1866.34	1908.49	567.598	569.289	575.222	565.58
ENSDARG00000007098	itm2ba	-1.46067	2.31071e-162	-1.86429	1.38241e-260	3056.51	2784.79	2623.34	2659.58	1004.8	1050.81	1001.57	977.745	786.11	759.319	761.429	742.187
ENSDARG00000099366	supt4h1	1.38021	6.01383e-162	0.348535	8.49209e-11	542.335	529.492	570.438	547.072	1405.96	1419.02	1478.42	1412.71	719.491	683.467	692.864	696.94
ENSDARG00000096651	gpr108	-3.06341	7.72732e-162	-0.930773	4.04802e-25	686.419	726.334	632.443	615.752	81.7596	99.1332	75.24	60.8211	344.423	328.16	366.641	352.484
ENSDARG00000070903	met	-4.43861	1.05177e-161	-1.99981	5.40091e-71	637.851	654.617	591.858	536.415	24.4515	32.1003	25.4057	29.489	157.888	122.96	155.173	166.39
ENSDARG00000013250	tars	3.68564	1.51178e-161	2.89968	2.80327e-99	48.5674	48.8292	75.5324	85.258	889.422	738.306	930.239	862.554	491.652	500.623	473.457	518.144
ENSDARG00000094097	NA	2.37389	1.81397e-161	1.40251	1.84938e-54	145.702	132.754	130.772	132.624	677	701.485	720.154	702.207	341.758	370.477	357.258	359.052
ENSDARG00000010137	ldb1a	-2.54125	2.45912e-161	-0.00665278	0.979421	964.871	996.421	940.209	882.183	152.057	207.708	137.777	152.053	975.976	897.449	955.575	931.93
ENSDARG00000016754	tbca	2.70505	2.54263e-161	3.07067	4.46451e-213	116.562	77.8216	116.117	88.8104	667.83	659	645.891	640.465	819.42	891.062	810.507	849.465
ENSDARG00000101029	NA	-2.41662	4.60545e-161	-3.2873	1.05503e-279	2857.38	2536.07	2265.97	2198.95	479.096	481.504	469.028	412.846	235.833	257.897	264.155	250.315
ENSDARG00000101999	cog3	-4.02766	5.54972e-161	-9.98724	2.59638e-42	665.373	819.415	635.825	656.013	42.79	42.4857	43.9714	40.5474	1.33239	0.798442	0	0
ENSDARG00000092954	mrpl34	2.85195	5.89295e-161	1.81714	7.49721e-64	82.5645	94.6066	109.353	136.176	715.205	808.172	796.371	794.361	389.058	364.888	381.797	381.675
ENSDARG00000062244	setd2	-2.50176	8.69332e-161	-0.0266767	0.77148	666.992	697.342	644.844	651.276	132.191	125.569	94.7828	113.348	610.901	641.149	658.221	698.4
ENSDARG00000003607	nr2f6a	-3.1101	1.33793e-160	0.306606	0.00130472	913.066	863.667	733.904	673.775	85.5801	107.63	85.0114	89.3886	969.314	966.115	995.992	993.231
ENSDARG00000061603	sorbs2b	-2.41386	1.58957e-160	-1.28498	8.20961e-59	974.585	1005.58	853.403	838.37	174.981	180.328	155.366	175.091	390.39	352.912	392.623	364.89
ENSDARG00000002445	prdm1a	4.27464	1.70776e-160	5.9942	0	25.9026	33.5701	27.0564	34.34	590.655	579.693	620.485	567.664	2004.58	1905.08	1907.54	1946.32
ENSDARG00000027345	mpzl2b	-2.58373	1.82309e-160	-1.05521	1.02617e-34	1159.14	1106.29	1010.1	1044.41	168.104	210.54	202.268	140.073	510.972	524.577	521.092	518.874
ENSDARG00000036625	polr2f	1.68105	3.94959e-160	0.758412	1.42339e-32	519.671	566.114	660.626	626.409	1972.16	1854.26	1961.12	1873.47	1006.62	1012.42	1051.57	971.338
ENSDARG00000039650	itm2cb	2.64084	4.34374e-160	0.428068	3.60231e-05	317.307	352.486	308.894	293.666	2041.7	1653.16	2066.66	2158.23	397.052	466.29	414.275	431.3
ENSDARG00000032849	ndrg1a	-3.54401	5.57721e-160	-3.05612	4.07036e-150	700.989	634.78	574.948	664.302	41.2618	68.9212	56.6743	55.2919	77.9448	81.4411	72.8951	76.627
ENSDARG00000035551	NA	-2.53735	6.60083e-160	-0.809739	1.21559e-26	647.565	691.238	625.679	603.911	112.324	110.463	96.7371	120.721	341.758	368.082	359.423	393.352
ENSDARG00000025605	nvl	-4.16857	2.6803e-159	-0.476059	7.00704e-07	550.43	497.448	535.491	502.075	23.6873	50.0387	20.52	22.1168	351.751	392.834	370.971	383.865
ENSDARG00000043663	faub	1.38279	2.68493e-159	0.0911403	0.116615	752.794	653.091	668.518	676.143	1729.18	1773.07	1818.46	1836.61	754.133	717.001	705.134	744.376
ENSDARG00000045843	apex1	2.38524	2.83943e-159	0.84189	4.53832e-20	320.545	376.9	288.601	277.088	1751.34	1461.51	1703.16	1641.25	550.943	547.731	586.048	564.85
ENSDARG00000035427	surf6	2.35096	2.86056e-159	1.77355	1.01803e-89	178.08	135.806	154.447	151.57	800.021	747.748	834.48	773.165	506.975	512.6	550.683	544.416
ENSDARG00000063100	psmd14	2.05869	4.65922e-159	1.18242	2.50405e-52	454.914	500.499	461.086	481.944	1955.35	1742.86	2061.77	2150.86	1003.96	1121.01	1068.89	1116.56
ENSDARG00000008542	yod1	-2.74102	5.27509e-159	-2.17623	1.2496e-131	600.616	598.158	559.165	538.783	84.0519	93.4685	83.0571	82.0163	125.245	140.526	120.53	121.144
ENSDARG00000004452	tardbpl	1.20492	7.27175e-159	0.501472	5.64816e-28	1423.02	1400.79	1412.57	1320.31	3282.61	2998.54	3151.28	3361.75	1962.61	1989.72	1949.4	1958
ENSDARG00000015315	psmc5	2.96839	1.0043e-158	2.07958	2.91498e-77	108.467	108.34	183.758	175.253	1136.99	1114.07	1172.57	1188.78	615.564	623.583	623.578	627.611
ENSDARG00000079783	isg20	4.28354	1.06663e-158	4.10165	7.98761e-146	32.3782	36.6219	42.8393	35.5242	744.241	608.017	778.782	780.538	652.871	619.591	643.065	650.964
ENSDARG00000075989	arpc2	1.88917	1.62244e-158	0.791295	1.95023e-28	1071.72	1141.38	1183.72	1139.14	4321.03	3575.4	4386.39	4540.39	1928.64	1979.34	1981.16	1970.41
ENSDARG00000037928	ddx42	-2.28814	1.65466e-158	-1.56946	1.69734e-86	1380.93	1222.26	1139.75	1121.38	246.807	269.076	244.286	233.148	373.736	423.174	420.049	418.894
ENSDARG00000076272	znf1041	-3.49527	1.69037e-158	-0.611352	3.47443e-11	527.765	592.054	526.472	525.758	48.9029	61.3682	33.2228	47.9197	349.086	324.168	389.736	356.133
ENSDARG00000100371	eef2b	1.70871	1.99702e-158	0.48248	7.67093e-14	12247.1	12041	12042.3	11601	38721.9	33581.6	41441.6	42955.4	16712.2	16691.4	16369.6	17194.4
ENSDARG00000071468	mrpl54	4.22222	2.72338e-158	3.55912	8.24772e-112	40.4728	25.9405	37.2025	27.2352	637.266	604.241	607.783	594.388	391.723	361.694	380.354	409.407
ENSDARG00000075904	rfx1b	-1.96087	4.22184e-158	-3.80935	0	1541.2	1570.16	1381	1502.67	421.788	347.438	372.291	392.573	105.925	97.41	111.869	110.927
ENSDARG00000100918	prc1a	1.7594	4.91459e-158	0.00103655	1	407.966	500.499	518.58	512.732	1726.12	1653.16	1624.01	1601.62	516.301	485.453	478.509	471.438
ENSDARG00000046106	rab10	3.8771	1.24489e-157	3.03363	3.8227e-96	80.9456	80.8734	76.6597	82.8897	1205	889.366	1319.14	1317.79	658.201	635.56	661.83	680.155
ENSDARG00000092947	cyt1	3.33001	1.28043e-157	0.368005	0.00531847	299.499	309.76	446.43	455.893	3896.19	3328.99	4047.32	4051.98	503.644	516.592	503.77	440.058
ENSDARG00000074686	mgea5	-2.39158	2.27534e-157	-1.25455	1.95098e-49	2030.12	1979.11	1613.24	1629.37	336.972	376.706	319.526	345.574	794.105	768.102	726.064	744.376
ENSDARG00000040606	tfap2c	5.0618	2.8313e-157	-0.722512	0.00343904	24.2837	24.4146	38.3299	27.2352	953.607	846.881	1071.93	1039.49	10.6591	18.3642	20.2085	21.8934
ENSDARG00000015653	tnip1	-2.66152	3.64082e-157	-1.61125	2.91159e-68	1426.26	1313.81	1073.24	1161.64	197.904	213.372	171	200.894	405.713	421.578	400.562	396.271
ENSDARG00000074747	brwd1	-5.26682	4.27164e-157	-2.01761	1.04478e-50	828.883	897.237	724.885	708.115	19.8668	36.8209	13.68	11.0584	179.207	206.797	185.486	207.258
ENSDARG00000055753	suv39h1b	3.2514	6.43922e-157	0.833754	2.86628e-10	58.2808	71.7179	74.405	93.547	763.344	648.614	740.674	729.853	132.573	133.34	134.242	139.388
ENSDARG00000044915	sfmbt1	5.6757	7.61267e-157	3.43319	2.00826e-56	24.2837	16.785	16.9102	14.2097	900.883	802.507	947.828	994.333	194.529	202.006	189.094	184.634
ENSDARG00000098890	cyp2aa9	3.10767	1.07483e-156	4.32425	0	64.7565	67.1402	62.0042	72.2325	615.871	574.028	585.308	521.587	1359.7	1341.38	1345.31	1298.28
ENSDARG00000061169	NA	1.77508	1.13835e-156	1.08265	3.00798e-57	273.596	320.442	277.328	300.771	1009.39	990.388	1052.38	956.55	628.888	614.002	613.474	623.233
ENSDARG00000016782	huwe1	-2.27861	2.64756e-156	-2.22927	2.69096e-157	1461.88	1458.77	1329.14	1233.87	275.079	319.115	267.737	266.323	282.467	301.811	316.119	267.1
ENSDARG00000077323	NA	-3.6989	6.08212e-156	-3.02831	1.5979e-145	547.192	558.484	545.637	541.151	35.149	62.3123	38.1086	34.0967	73.9477	65.4723	66.3995	62.0313
ENSDARG00000097973	NA	2.30855	7.4888e-156	0.294282	0.00173669	346.447	268.561	310.021	255.774	1522.1	1315.17	1519.46	1473.53	346.422	351.315	373.136	372.188
ENSDARG00000005172	NA	-1.77805	8.44766e-156	-1.16436	2.09804e-74	2002.59	1861.61	1707.93	1682.66	540.224	537.208	487.594	543.704	806.096	848.744	778.029	797.65
ENSDARG00000032831	htra1a	-2.28354	1.47259e-155	-3.1532	7.4835e-280	2653.4	2717.65	2622.21	2735.36	546.337	597.632	570.651	488.412	270.475	369.679	289.415	278.046
ENSDARG00000056803	ap1s1	-2.81947	2.23415e-155	-1.1504	9.94331e-31	1701.48	1786.84	1704.55	1673.19	240.694	321.003	205.2	204.58	762.794	800.838	782.359	745.836
ENSDARG00000069422	nhp2	1.11015	8.23414e-155	0.487608	2.95935e-30	1418.17	1345.86	1313.36	1282.42	2973.91	2891.86	2773.13	2897.3	1860.02	1950.59	1857.74	1830.29
ENSDARG00000041619	gnb2l1	0.983949	1.33985e-154	0.295274	5.04414e-15	5641.91	5584.84	5708.89	5606.9	11144.5	10427.9	11238.1	11781.8	6899.78	6771.59	6885.34	7108.06
ENSDARG00000035678	zgc:91910	-0.859441	1.35138e-154	0.266406	2.27925e-19	2779.67	2789.37	2826.26	2718.78	1525.92	1571.97	1525.32	1503.02	3318.98	3322.32	3420.3	3305.91
ENSDARG00000020482	nono	1.00636	1.43576e-154	0.282412	3.62617e-13	2491.51	2439.93	2661.67	2706.94	5083.61	5385.29	5160.29	5109.89	3101.14	3176.2	3193.67	3084.05
ENSDARG00000021566	NA	3.23931	1.48911e-154	3.32967	3.36081e-164	158.653	120.547	105.971	103.02	1089.62	980.003	1240.97	1244.99	1161.18	1202.45	1168.49	1317.25
ENSDARG00000014274	rfc2	2.42515	1.49413e-154	-0.923259	1.25607e-18	280.072	263.983	233.361	292.482	1407.49	1269.85	1557.56	1503.02	140.567	142.921	145.068	134.28
ENSDARG00000058243	phactr3a	2.30504	2.39033e-154	2.35622	4.43645e-164	163.51	126.651	160.084	150.386	709.856	760.021	746.537	765.793	824.75	748.14	760.707	751.674
ENSDARG00000031495	seta	1.16467	3.04388e-154	0.406656	7.62908e-20	6176.15	5923.59	5883.63	5987	13302.4	12266.1	14223.3	13939.1	7921.06	8058.68	7939.07	7850.98
ENSDARG00000005774	ddx3b	-1.41766	4.57803e-154	-1.53727	8.8789e-187	1531.49	1760.9	1616.62	1624.64	596.768	609.905	633.188	607.29	570.263	551.724	545.631	582.365
ENSDARG00000074533	slc25a38b	3.68044	5.97817e-154	1.73159	4.93675e-33	79.3267	61.0365	59.7495	50.918	787.031	680.715	895.062	817.399	205.854	202.804	212.911	201.419
ENSDARG00000054540	imp4	2.85836	7.80525e-154	0.864888	1.2148e-14	197.507	205.998	281.837	283.009	1783.43	1582.35	1806.74	1930.61	451.014	419.981	479.953	431.3
ENSDARG00000090870	NA	-6.63569	8.6052e-154	-2.48311	5.75563e-155	874.212	840.778	767.725	777.979	3.05643	20.7708	5.86285	3.68613	149.228	152.502	140.738	139.388
ENSDARG00000034897	rps10	1.28602	9.799e-154	0.397714	1.33181e-15	1725.76	1718.18	1856.74	1931.33	4443.29	4701.75	4212.46	4315.53	2438.27	2324.27	2352.85	2430.9
ENSDARG00000102452	eif3ha	2.61566	1.01398e-153	1.72745	7.59445e-67	216.934	265.509	306.639	325.638	1733.76	1518.15	1784.26	1863.34	922.68	947.751	890.619	966.229
ENSDARG00000102634	parn	-4.65969	1.06658e-153	0.122992	0.139126	471.103	489.818	450.94	413.264	16.0463	23.6031	15.6343	16.5876	502.977	500.623	468.405	508.657
ENSDARG00000102483	NA	-2.65983	1.22572e-153	-4.61431	3.58921e-279	1026.39	965.903	940.209	929.549	150.529	167.11	128.983	163.111	47.9661	29.5424	46.9127	31.3806
ENSDARG00000059654	eif3ba	2.33903	1.3154e-153	-1.65287	6.17702e-70	1382.55	1225.31	1342.67	1299	6585.08	5390.01	7443.87	7158.46	413.707	414.392	411.388	429.111
ENSDARG00000009169	mob1ba	-3.72671	1.73413e-153	-0.92523	1.02558e-15	875.831	906.392	683.173	717.588	46.6106	73.6418	67.4228	53.4489	401.716	447.926	417.162	405.028
ENSDARG00000008808	eml2	-3.37042	2.36954e-153	0.460171	4.30093e-09	477.579	433.359	455.449	402.607	29.0361	51.9269	47.88	44.2335	586.918	617.196	615.639	609.367
ENSDARG00000075700	zswim2	-5.51483	2.93972e-153	-4.30156	3.35489e-157	858.023	860.615	722.631	682.064	20.6309	27.3796	10.7486	8.29379	38.6393	41.519	42.5823	35.0295
ENSDARG00000036107	NA	1.49368	3.6749e-153	0.195054	0.00102552	1599.48	1606.79	1490.36	1460.04	4282.06	3912.46	4549.57	4568.96	1782.07	1798.89	1714.84	1741.26
ENSDARG00000077536	snrnp200	1.84388	5.15723e-153	0.949182	1.49522e-40	503.482	531.018	586.221	609.831	2012.66	1853.32	2073.5	2108.47	1028.61	1038.77	1112.91	1147.94
ENSDARG00000067741	itpkcb	-4.28934	3.68041e-152	-1.01333	1.52522e-13	1133.24	1065.09	915.407	972.178	38.2054	83.0831	41.04	46.9981	471.666	487.848	550.683	510.846
ENSDARG00000017272	eapp	2.8204	3.94263e-152	3.17218	6.96126e-197	63.1376	71.7179	92.4426	103.02	623.512	574.028	577.491	615.583	753.467	736.164	785.968	777.946
ENSDARG00000008434	bcl2l1	2.75041	4.09574e-152	2.09403	6.09672e-88	192.65	222.783	186.013	230.907	1456.39	1149	1511.64	1489.2	925.345	862.318	886.289	882.305
ENSDARG00000009534	wls	-1.19618	5.73277e-152	-1.13258	6.43133e-139	6686.11	6248.61	6038.08	5708.73	2656.04	2690.76	2700.82	2714.83	2818.01	2866.41	2714.44	2848.33
ENSDARG00000079378	NA	-1.88337	6.07435e-152	-1.59819	9.30521e-125	903.353	923.177	944.718	930.733	242.222	236.976	244.286	281.067	307.782	291.431	290.859	332.78
ENSDARG00000038615	tmem55ba	-4.58834	6.66958e-152	-2.94259	7.71079e-87	1104.1	1080.35	930.063	856.132	42.0259	60.4241	24.4286	36.8613	109.256	142.921	134.242	129.171
ENSDARG00000041875	ube2v1	1.20283	6.74e-152	0.291069	1.13617e-09	851.548	863.667	870.313	917.707	2057.74	1908.08	2033.43	2077.13	1087.9	1068.32	1078.99	1058.18
ENSDARG00000101717	sox17	-1.07172	1.97402e-151	-0.904726	3.28211e-109	18500.9	19128.8	17482.9	17445.9	8351.7	8235.61	9108.92	8817.22	9804.4	9657.16	9715.98	9565.96
ENSDARG00000043046	fbxl5	4.05485	2.01732e-151	1.79731	2.44801e-28	27.5215	28.9923	39.4572	48.5497	644.907	611.794	619.508	600.839	115.918	125.355	144.347	132.82
ENSDARG00000075564	fam13a	-1.92088	2.28746e-151	0.490943	6.87231e-16	835.358	975.058	822.965	822.976	218.535	226.59	219.857	246.049	1239.79	1212.04	1189.42	1204.14
ENSDARG00000096007	znf1067	-5.94995	2.57669e-151	-2.85632	7.07053e-152	700.989	668.35	648.226	613.384	6.87697	20.7708	3.90857	11.0584	88.604	93.4178	100.321	80.2759
ENSDARG00000032405	ckap4	3.64694	2.83737e-151	0.266168	0.101893	82.5645	64.0883	83.4238	81.7056	942.909	855.378	1071.93	1063.45	89.2702	106.193	77.2255	105.088
ENSDARG00000099724	relt	-2.23952	5.18498e-151	-0.347268	4.60923e-06	1026.39	1045.25	941.336	854.948	194.083	206.764	185.657	230.383	733.481	774.489	741.22	783.784
ENSDARG00000089663	NA	1.30892	5.3613e-151	0.0950732	0.0897342	715.559	650.039	730.522	734.166	1715.42	1795.73	1787.19	1738.01	794.771	736.164	755.655	742.917
ENSDARG00000062983	fbxo18	-1.7206	6.68068e-151	-0.629435	1.42038e-23	2391.13	2346.85	2020.21	2106.58	676.236	721.312	622.44	663.503	1402.34	1461.95	1383.56	1472.7
ENSDARG00000077264	wdr43	3.21953	1.22149e-150	3.12638	2.24556e-142	131.132	166.324	234.489	210.777	1742.93	1506.82	1939.63	1832.93	1646.83	1616.85	1652.05	1666.82
ENSDARG00000018968	acvr1ba	-1.67776	1.35353e-150	-0.201243	0.001742	4636.56	4506.02	4121.59	3863.84	1342.54	1213.2	1345.52	1445.88	3656.08	3735.91	3774.67	3718.23
ENSDARG00000103316	NA	-3.51098	2.35919e-150	-1.7993	7.56486e-47	1782.42	1713.6	1464.43	1410.31	121.493	190.713	133.868	112.427	475.663	480.662	438.814	432.03
ENSDARG00000087483	si:dkey-226l10.6	-3.62939	4.86494e-150	-0.0765771	0.414694	443.582	398.263	449.812	418.001	25.9797	50.0387	30.2914	33.1751	397.719	417.585	389.014	418.894
ENSDARG00000013382	cwc15	1.66538	5.17192e-150	1.23032	5.56354e-82	594.141	619.521	631.315	651.276	1974.46	1790.06	2123.33	2048.57	1433.65	1475.52	1421.82	1539.11
ENSDARG00000061490	u2surp	-2.26238	7.51066e-150	-1.87591	5.23681e-119	845.072	866.718	860.167	856.132	167.34	218.093	165.137	164.954	229.171	214.781	241.059	248.125
ENSDARG00000101849	adipor2	2.31528	8.90704e-150	0.655236	5.57299e-12	145.702	186.161	162.338	139.728	812.247	787.401	738.72	805.419	245.16	240.331	247.555	261.991
ENSDARG00000075687	anapc1	4.36679	1.1967e-149	4.23273	8.52619e-141	61.5186	67.1402	60.8768	63.9435	1343.3	913.914	1442.26	1548.17	1184.5	1210.44	1184.36	1202.68
ENSDARG00000016318	med7	2.90773	1.8598e-149	0.508888	2.63612e-05	140.845	112.918	130.772	144.465	1035.37	862.931	1063.13	1021.98	211.184	184.44	186.929	171.498
ENSDARG00000062806	ttll9	-6.94125	1.93449e-149	-0.751044	4.27323e-33	880.688	846.882	848.894	794.557	3.82054	17.9384	0.977142	4.60766	500.979	488.647	510.987	498.44
ENSDARG00000009212	ppiaa	0.810491	2.45634e-149	-1.44031	0	6359.09	6454.61	6844.13	6774.46	11542.6	11637.3	11462.9	11762.4	2402.97	2382.55	2417.09	2546.2
ENSDARG00000000606	dnah7l	-6.46385	3.94913e-149	-5.46285	2.01764e-180	1104.1	1036.09	895.115	822.976	3.82054	17.9384	6.84	15.666	25.9816	19.1626	21.652	19.7041
ENSDARG00000061631	fbxo11a	-3.10615	4.64682e-149	-0.641995	1.32602e-10	806.218	820.941	733.904	685.616	84.0519	115.183	83.0571	70.958	497.648	530.166	453.97	467.06
ENSDARG00000097964	arhgef33	-4.98534	1.00297e-148	-9.48536	1.56457e-62	893.639	1063.56	790.272	743.639	19.8668	34.9327	27.36	28.5675	0.666195	0.798442	1.44347	1.45956
ENSDARG00000023920	llgl2	-1.66752	1.01064e-148	-1.41504	5.98992e-114	2148.3	2073.72	1863.51	1927.78	649.492	672.218	581.4	612.819	744.806	729.776	799.681	724.672
ENSDARG00000062326	zgc:158409	1.02722	1.53157e-148	-0.177434	1.6327e-05	3571.32	3614.89	3533.11	3476.63	7223.88	6738.23	7383.29	7576.84	3093.14	3060.43	3195.84	3197.9
ENSDARG00000041182	rpl4	1.10216	1.8647e-148	-0.258054	3.25568e-09	5447.64	5398.68	5595.03	5789.25	11979.7	11352.2	12242.6	12174.4	4490.16	4548.73	4563.52	4996.08
ENSDARG00000091563	snw1	-1.71234	2.15989e-148	1.35508	2.59643e-157	720.416	773.638	795.908	817.056	223.12	245.473	259.92	225.775	2032.56	2004.09	1938.58	2000.33
ENSDARG00000020541	ism1	4.38454	2.66838e-148	4.408	1.21062e-150	27.5215	25.9405	27.0564	29.6035	593.712	546.649	582.377	596.231	618.895	608.413	567.283	563.391
ENSDARG00000026839	med21	1.69082	2.89749e-148	1.44053	2.59803e-108	307.593	357.064	346.096	322.086	1024.67	1069.69	1131.53	1088.33	928.01	877.488	931.758	884.494
ENSDARG00000039365	cuedc2	3.73715	3.48325e-148	-0.973693	2.87627e-08	79.3267	61.0365	73.2777	98.2835	1111.78	861.043	1127.62	1096.62	39.9717	42.3174	39.6954	37.9486
ENSDARG00000035282	emc6	2.69495	3.58108e-148	1.43963	2.65622e-42	257.407	228.887	312.276	328.006	1829.27	1641.83	1955.26	1931.53	752.134	766.505	707.299	855.303
ENSDARG00000007359	UBL4B	2.48426	4.0372e-148	3.27729	1.20863e-268	84.1834	96.1325	110.48	137.36	601.353	589.134	627.325	629.406	1078.57	1025.2	1053.73	1080.08
ENSDARG00000022727	NA	-4.91247	5.51229e-148	-5.11769	1.21667e-161	3597.22	3633.2	3167.85	3136.78	100.098	178.44	102.6	66.3503	92.6011	99.0068	94.5471	101.439
ENSDARG00000010721	sept6	-2.31533	8.98319e-148	0.164591	0.0620959	1753.28	1835.67	1829.69	1748.97	362.187	452.236	321.48	303.184	1983.26	2004.09	2051.89	1995.22
ENSDARG00000093313	ubb	5.96033	9.13307e-148	4.99667	9.99206e-104	14.5702	21.3628	28.1837	10.6572	1137.76	904.473	1359.2	1369.4	610.235	610.808	606.978	616.665
ENSDARG00000099143	fnta	3.65396	9.57184e-148	-2.55675	1.26334e-29	51.8052	74.7697	78.9144	78.1531	934.504	820.445	911.674	953.786	17.9873	5.5891	17.3216	6.56803
ENSDARG00000094272	map3k19	-3.69263	9.71986e-148	-1.29149	4.77602e-27	927.636	933.859	755.324	715.22	61.8927	82.1389	47.88	64.5072	354.416	303.408	349.319	349.565
ENSDARG00000067718	si:dkey-3h3.3	-3.15033	9.91993e-148	-2.80305	6.12975e-136	802.98	744.645	702.338	684.432	82.5237	97.245	64.4914	84.7809	89.2702	110.185	100.321	120.414
ENSDARG00000016815	NA	-3.61847	1.03039e-147	0.102021	0.244993	396.633	370.797	411.482	445.236	29.8002	38.7092	30.2914	34.0967	439.023	455.911	416.44	438.598
ENSDARG00000019810	nfe2l3	-2.47219	2.51958e-147	-1.50525	5.01891e-60	2442.94	2220.2	1944.68	1962.12	404.213	442.795	347.863	345.574	737.478	783.272	787.411	706.428
ENSDARG00000011312	stk3	3.77561	3.05307e-147	2.43537	7.44254e-60	43.7106	45.7774	50.7307	42.629	635.738	570.252	631.234	683.777	222.509	249.912	256.937	267.1
ENSDARG00000103453	zfpl1	-2.48272	7.8392e-147	-2.24262	3.40224e-138	744.699	656.142	632.443	646.54	120.729	134.066	104.554	117.956	139.235	146.913	144.347	134.28
ENSDARG00000029688	hsp70.1	6.98427	7.90533e-147	0.185482	0.631918	17.808	6.10365	11.2735	5.92069	1231.74	1380.31	1235.11	1277.24	11.3253	11.1782	12.9912	10.2169
ENSDARG00000099767	NA	-2.72759	1.03955e-146	-2.58011	3.41074e-142	1083.05	1004.05	953.737	849.027	161.991	158.613	120.189	142.837	165.883	172.464	153.008	157.633
ENSDARG00000055639	ruvbl2	-1.82349	1.32365e-146	0.186386	0.00314283	971.347	1007.1	1128.48	1014.81	297.238	313.45	264.806	290.283	1199.15	1186.49	1107.14	1208.52
ENSDARG00000070939	znf740a	4.34699	1.39685e-146	1.95537	2.99376e-29	42.0917	39.6737	66.5136	50.918	1040.72	808.172	1128.6	1171.27	209.852	185.239	194.868	199.23
ENSDARG00000026712	rab5c	2.49576	1.42067e-146	0.728142	1.05018e-12	153.797	193.791	157.829	200.119	1036.89	894.087	1056.29	999.862	283.799	293.827	313.232	280.236
ENSDARG00000033889	spty2d1	2.68143	2.22134e-146	0.794597	7.91294e-13	114.943	119.021	128.518	127.887	795.436	706.206	820.8	842.28	232.502	206.797	199.198	216.015
ENSDARG00000024651	snrpa1	1.87758	3.12668e-146	0.597562	1.58417e-15	621.662	666.824	683.173	686.8	2506.27	2105.4	2531.78	2644.8	987.968	1037.98	1003.21	1001.99
ENSDARG00000071601	pvalb9	5.04656	3.89466e-146	5.51781	1.1288e-175	17.808	16.785	23.6743	20.1304	631.917	743.027	653.708	634.935	906.692	915.015	949.08	918.794
ENSDARG00000021494	hnf4a	2.84838	4.71304e-146	3.62	1.54205e-242	69.6132	65.6142	112.735	100.652	602.881	627.844	684	673.64	1117.21	1132.99	1110.75	1053.8
ENSDARG00000063062	ubn2a	-2.1198	5.23263e-146	-1.36482	1.8651e-72	1005.34	1051.35	1025.89	905.866	204.781	247.361	240.377	226.697	395.054	409.601	351.484	391.162
ENSDARG00000101441	lima1a	-2.24162	5.28133e-146	-1.8443	2.37509e-102	3911.29	3747.64	3376.41	3499.13	721.318	931.852	752.4	666.268	1001.29	982.882	1037.85	1021.69
ENSDARG00000070940	htr2b	-4.69686	7.53788e-146	-9.69594	2.22898e-39	513.195	645.461	551.274	522.205	20.6309	19.8266	24.4286	21.1952	0	0	1.44347	0.729781
ENSDARG00000074323	efcab2	-3.04902	8.01945e-146	-0.0556838	0.562606	454.914	480.663	483.633	442.868	65.7133	68.9212	39.0857	48.8412	450.348	467.887	424.379	449.545
ENSDARG00000038847	gins3	3.56475	8.99982e-146	-0.602141	0.000175765	123.037	109.866	66.5136	116.046	1231.74	1132.95	1294.71	1207.21	67.2857	73.4567	75.782	54.0038
ENSDARG00000086618	psma3	1.38996	1.07926e-145	1.28209	9.23152e-126	547.192	601.21	603.132	563.65	1587.05	1496.44	1434.44	1553.7	1385.69	1430.01	1382.12	1442.78
ENSDARG00000001879	nav2b	-3.10954	1.19467e-145	1.01484	4.39743e-26	757.651	788.897	621.169	627.593	65.7133	102.91	76.2171	79.2517	1446.31	1381.31	1451.41	1351.55
ENSDARG00000044485	sall4	3.82504	1.92618e-145	3.97356	6.15075e-158	32.3782	56.4588	57.4948	61.5752	741.949	619.347	815.914	835.829	838.74	816.008	832.159	852.384
ENSDARG00000039150	lgmn	-2.57059	2.30019e-145	0.604985	5.22556e-15	654.04	619.521	624.551	545.888	111.56	117.072	78.1714	101.369	938.669	934.976	957.019	878.656
ENSDARG00000003281	pik3ip1	2.68046	3.91841e-145	1.84423	5.18986e-68	179.699	148.014	142.046	129.071	960.484	854.434	947.828	1042.25	528.293	494.236	581.717	526.172
ENSDARG00000068177	pak2a	-1.92524	4.07424e-145	1.28211	3.43011e-88	1087.91	1063.56	1094.66	1104.8	262.089	352.159	260.897	272.773	2656.12	2708.32	2535.45	2687.78
ENSDARG00000022315	atp6v1g1	1.42435	4.29034e-145	1.3776	6.00327e-138	545.573	595.106	598.622	554.177	1540.44	1434.13	1606.42	1583.19	1449.64	1492.29	1528.63	1497.51
ENSDARG00000093760	NA	-2.0493	5.8315e-145	-0.342008	3.94786e-07	775.459	770.586	703.466	689.169	193.319	155.781	184.68	171.405	556.273	574.08	583.883	596.96
ENSDARG00000009743	NA	-1.41819	6.52308e-145	-0.315107	1.26603e-09	1664.24	1678.5	1860.13	1881.6	646.435	667.497	639.051	704.972	1424.33	1458.75	1390.06	1436.21
ENSDARG00000067524	fut9b	6.06414	7.96004e-145	3.34864	1.89905e-43	4.85674	15.2591	22.547	10.6572	926.863	854.434	1002.55	992.49	142.566	148.51	156.616	126.982
ENSDARG00000005772	tsr2	2.25581	1.13427e-144	0.113856	0.276133	215.315	238.042	259.29	254.59	1191.24	1029.1	1191.14	1236.7	254.487	273.067	278.589	247.396
ENSDARG00000059908	NA	1.79045	1.71281e-144	0.539984	9.47069e-14	441.963	503.551	542.255	558.913	1771.97	1653.16	1811.62	1885.45	740.143	729.776	730.394	792.542
ENSDARG00000053381	PLPP1 (1 of many)	3.01813	1.7928e-144	3.72247	1.34892e-224	97.1347	71.7179	82.2965	84.0738	692.282	578.749	747.514	694.835	1083.9	1081.09	1142.5	1114.37
ENSDARG00000037998	NA	-1.46248	2.50739e-144	-2.43084	0	1348.55	1362.64	1254.74	1278.87	482.916	467.342	448.508	498.549	234.501	249.114	251.163	236.449
ENSDARG00000043624	pqlc2	3.56591	3.74136e-144	2.42945	7.87011e-66	59.8997	35.096	74.405	60.3911	702.979	649.559	764.125	665.346	342.424	304.207	326.945	290.453
ENSDARG00000042522	NA	3.07211	4.70267e-144	4.01047	2.18732e-252	77.7078	56.4588	71.023	76.969	587.599	561.755	598.011	640.465	1100.55	1124.21	1094.15	1257.41
ENSDARG00000003846	mrpl21	5.98651	7.4089e-144	5.34429	1.57451e-114	9.71347	12.2073	9.01879	20.1304	851.216	820.445	825.685	838.594	550.277	522.98	523.257	540.767
ENSDARG00000070360	fam212aa	3.90846	7.45126e-144	2.68386	4.5203e-67	56.6619	45.7774	54.1127	62.7593	879.488	663.72	936.102	842.28	368.406	343.33	372.415	336.429
ENSDARG00000007786	tmx2b	-2.79019	2.10356e-143	-1.0169	9.51952e-29	709.083	733.964	595.24	625.225	89.4006	89.692	115.303	90.3101	305.117	330.555	337.771	338.618
ENSDARG00000041170	aagab	-6.92597	2.356e-143	-2.23099	1.01121e-91	945.444	906.392	854.53	846.659	4.58465	19.8266	1.95428	2.7646	197.86	216.378	165.999	175.877
ENSDARG00000028539	morc2	-3.24546	2.62025e-143	0.221334	0.0466788	799.742	848.407	748.56	802.846	80.2313	123.68	71.3314	61.7426	951.993	934.976	910.106	930.47
ENSDARG00000033009	h3f3b.1	1.34254	3.9908e-143	0.667959	7.63333e-36	1133.24	1210.05	1229.94	1200.72	2989.95	2810.66	3302.74	3022.62	1877.34	1893.91	1887.33	1936.84
ENSDARG00000024465	mrps18a	-2.88613	4.40036e-143	-0.231003	0.00531245	501.863	469.981	443.048	458.262	56.544	79.3066	56.6743	60.8211	372.403	407.206	418.606	394.082
ENSDARG00000002971	phc1	2.38264	5.21187e-143	3.61291	0	134.37	111.392	117.244	127.887	634.21	586.302	636.12	701.286	1460.97	1521.83	1514.92	1505.54
ENSDARG00000089787	crebzf	2.20212	6.01973e-143	-0.873985	2.53889e-20	441.963	428.781	529.854	427.474	2225.08	1873.15	2163.39	2177.58	231.836	252.308	274.259	242.287
ENSDARG00000063626	ddx21	2.03805	7.95005e-143	2.73937	1.11964e-268	182.937	190.739	210.814	222.618	847.396	783.624	891.154	822.006	1419.66	1386.89	1294.79	1336.23
ENSDARG00000025581	rpl10	0.87213	1.40022e-142	0.180521	2.73222e-07	5267.94	5418.52	5706.64	5656.63	10375.8	10088.9	9834.94	10096.3	6224.93	6140.02	6126.08	6522.78
ENSDARG00000078772	NA	-2.39932	1.5424e-141	-0.29525	8.47289e-05	521.29	578.321	590.731	543.52	90.1647	126.513	109.44	100.447	465.67	456.709	458.301	442.247
ENSDARG00000063553	rlf	-4.55121	2.03055e-141	-3.51252	2.17591e-113	848.31	852.985	751.942	769.69	33.6208	57.5917	22.4743	23.0383	68.6181	64.6738	77.9472	70.0589
ENSDARG00000045515	kin	4.70875	2.26289e-141	4.79778	2.64253e-147	24.2837	28.9923	27.0564	26.051	725.138	566.475	733.834	777.773	724.82	768.9	734.003	755.323
ENSDARG00000052553	lig3	-1.66564	2.27871e-141	-0.916205	2.99893e-48	1941.08	1931.81	1758.66	1739.5	580.722	519.269	646.868	573.193	942.666	993.262	1001.04	963.31
ENSDARG00000019498	cry5	-4.65575	2.80607e-141	0.0383681	0.819149	728.51	601.21	638.079	560.098	19.1027	46.2622	15.6343	19.3522	675.522	651.529	650.282	615.205
ENSDARG00000045518	tmem110l	3.08967	3.10587e-141	-0.599648	8.5672e-06	212.077	221.257	204.05	197.751	1802.53	1365.21	2020.73	1916.79	138.569	130.945	144.347	135.739
ENSDARG00000056267	dixdc1b	-4.82573	4.24995e-141	-0.450978	0.00171075	772.221	743.12	767.725	716.404	19.8668	52.871	16.6114	16.5876	551.61	538.949	533.361	569.229
ENSDARG00000079327	hmcn2	-4.74227	8.42952e-141	-1.3867	1.31345e-18	1155.9	1112.39	992.067	984.019	35.149	68.9212	20.52	33.1751	420.369	394.431	413.553	391.892
ENSDARG00000062187	kif14	-4.46313	1.21518e-140	-2.64325	2.31244e-90	673.467	572.217	508.434	509.18	25.9797	28.3238	24.4286	23.0383	87.9378	98.2084	76.5038	98.5204
ENSDARG00000042029	mbd3b	-1.282	1.44389e-140	0.284552	5.02612e-09	3121.26	3050.3	2839.79	2954.43	1155.33	1350.1	1249.77	1164.82	3588.79	3683.21	3619.49	3669.34
ENSDARG00000041107	cftr	-1.87922	1.70438e-140	-2.72912	3.40766e-279	2791	2668.82	2473.4	2329.2	710.62	619.347	687.908	766.715	383.728	385.648	369.528	406.488
ENSDARG00000000212	krt97	2.64314	1.72257e-140	0.377827	0.000572605	484.055	482.188	652.735	608.647	3429.32	4103.17	3226.52	3230.89	724.154	717.8	764.316	701.319
ENSDARG00000042030	kpna5	-2.12265	1.90004e-140	-2.00499	1.74031e-137	880.688	813.311	766.597	838.37	205.545	188.825	175.886	183.385	209.185	218.773	181.877	210.907
ENSDARG00000099651	bin3	-3.80471	2.88888e-140	-4.82093	1.79879e-192	1204.47	1341.28	939.082	946.127	71.062	72.6977	89.8971	82.9379	41.9703	37.5268	44.0258	32.1103
ENSDARG00000036865	slc2a12	-1.58515	5.38959e-140	-7.94236	0	2923.75	2713.07	2556.83	2489.06	913.873	854.434	903.857	881.906	7.99434	10.3798	10.826	13.8658
ENSDARG00000079687	rnf10	-1.27855	5.75009e-140	-0.561244	8.23217e-31	2481.79	2560.48	2249.06	2280.65	954.371	955.455	988.868	1040.41	1602.2	1618.44	1625.34	1628.14
ENSDARG00000055373	sema3fb	-3.07328	1.06935e-139	-3.01893	4.78412e-141	1379.31	1377.9	1262.63	1192.43	132.191	202.987	135.823	148.367	153.225	184.44	144.347	160.552
ENSDARG00000061397	trip12	-2.08465	1.07467e-139	-0.352621	7.72218e-06	1685.29	1734.96	1676.37	1642.4	366.008	495.666	370.337	357.554	1292.42	1336.59	1344.59	1302.66
ENSDARG00000103521	capsla	-1.81087	1.13767e-139	-2.68302	1.41152e-272	1188.28	1235.99	1348.31	1381.89	351.49	349.327	381.086	391.651	211.184	201.207	186.929	204.339
ENSDARG00000010791	dla	-2.28153	1.29432e-139	-1.73108	1.67568e-86	2154.77	2056.93	1658.33	1713.45	360.659	403.142	417.24	376.907	576.925	578.072	547.796	576.527
ENSDARG00000069463	alox12	2.29463	1.4464e-139	-1.08569	2.0853e-21	158.653	157.169	166.848	150.386	785.503	829.887	761.194	732.618	76.6125	72.6583	68.5647	80.2759
ENSDARG00000039034	marcksl1a	-0.61744	2.22842e-139	-0.507383	2.41324e-97	10403.1	10122.9	10083	9829.53	6506.38	6522.97	6753.03	6566.84	7094.98	7155.64	6979.89	7202.93
ENSDARG00000037108	pfdn6	2.6811	2.51874e-139	1.88918	1.43602e-68	135.989	114.443	165.72	143.281	885.601	1017.77	800.28	924.297	504.31	530.166	533.361	527.631
ENSDARG00000019230	rpl7a	1.0453	2.55611e-139	0.0386993	0.419203	6796.19	6759.79	7199.25	7169.96	14835.9	13348.1	14549.6	14927	7173.59	7081.38	7026.8	7416.76
ENSDARG00000075461	suv420h2	3.82435	2.85313e-139	1.9536	8.31484e-35	37.235	25.9405	43.9666	40.2607	559.327	513.604	511.045	547.39	153.891	138.929	147.234	142.307
ENSDARG00000091656	lsm8	1.74427	3.05433e-139	1.3088	1.76246e-78	467.865	405.893	511.816	517.469	1571.77	1729.64	1600.56	1513.16	1189.16	1219.22	1183.64	1150.86
ENSDARG00000039677	dsc2l	1.84281	3.20881e-139	0.803961	4.46513e-26	310.831	270.087	254.781	258.142	924.571	995.109	1034.79	945.492	468.335	473.476	466.962	487.493
ENSDARG00000101431	gas8	-4.1697	3.30281e-139	-0.668842	4.27128e-06	1134.86	1098.66	995.449	1126.12	53.4876	97.245	36.1543	54.3704	672.191	649.932	723.899	691.102
ENSDARG00000104687	slc16a9b	7.19781	3.74289e-139	2.31215	1.82984e-14	4.85674	16.785	9.01879	10.6572	1600.04	1198.1	1672.87	1701.15	48.6323	43.9143	59.9039	55.4633
ENSDARG00000104372	gnb1b	-1.44531	4.47073e-139	0.101776	0.0837592	3257.25	3109.81	3366.26	3282.43	1117.89	1360.49	1134.46	1171.27	3397.6	3493.19	3482.36	3600.74
ENSDARG00000075169	bbs1	-3.58042	5.43919e-139	0.0207171	0.849435	364.255	376.9	356.242	373.004	29.0361	42.4857	28.3371	23.0383	365.741	392.035	368.084	365.62
ENSDARG00000103296	NA	6.01438	7.56972e-139	2.29911	3.84303e-20	17.808	24.4146	16.9102	13.0255	1153.8	868.596	1331.84	1277.24	83.9406	101.402	82.2776	84.6545
ENSDARG00000099455	ogt.2	-3.91315	8.97056e-139	-6.78281	8.41868e-156	900.115	909.444	818.455	779.163	62.6569	75.5301	47.88	38.7043	9.32673	7.98442	8.6608	4.37868
ENSDARG00000059070	gars	2.39306	9.25256e-139	0.489717	1.82084e-06	174.842	143.436	196.159	185.91	925.335	856.322	985.937	944.57	236.499	262.688	228.79	264.91
ENSDARG00000103339	NA	-1.86937	9.30562e-139	1.04309	6.38066e-57	1322.65	1208.52	1191.61	1083.49	295.71	354.047	352.748	313.321	2478.91	2498.33	2549.16	2357.92
ENSDARG00000057491	n4bp1	-6.6059	1.13024e-138	-2.7098	1.7421e-115	861.261	825.519	680.919	736.534	6.87697	16.0501	1.95428	6.45072	129.908	122.96	111.869	108.008
ENSDARG00000101277	znf207b	2.21387	1.3825e-138	1.40691	2.37007e-55	220.172	228.887	216.451	187.094	1025.43	866.707	1039.68	1007.23	553.608	538.949	577.387	581.635
ENSDARG00000015164	mknk2b	1.96319	1.40446e-138	1.65225	1.84041e-98	480.817	355.538	393.445	335.111	1544.26	1436.02	1509.68	1578.58	1206.48	1209.64	1216.84	1259.6
ENSDARG00000098574	srsf11	1.51881	1.56131e-138	0.617928	7.43474e-24	2831.48	3089.97	3246.76	3141.52	8761.26	7832.47	9270.15	9445.7	4674.03	4769.1	4632.81	4832.61
ENSDARG00000079324	NA	-2.54137	1.73686e-138	-1.60185	2.01202e-65	1126.76	1094.08	923.299	960.336	178.037	176.552	173.931	174.17	309.115	301.811	354.371	383.135
ENSDARG00000015015	tspan18b	-2.19724	2.40607e-138	-0.701384	5.21924e-20	887.164	828.571	750.814	706.931	170.396	176.552	160.251	181.542	492.984	471.081	478.509	500.629
ENSDARG00000005560	ywhah	2.11584	2.46371e-138	1.48099	2.74756e-67	208.84	227.361	205.177	274.72	1068.99	975.282	963.462	976.824	617.563	667.498	621.413	662.641
ENSDARG00000052966	nmt1a	2.35969	3.96938e-138	1.77977	6.71165e-78	131.132	134.28	146.555	139.728	717.497	736.418	641.005	751.049	449.682	490.244	474.901	491.142
ENSDARG00000056753	dctn1b	-6.43138	4.34961e-138	-8.75184	9.37141e-103	1491.02	1440.46	1070.98	907.05	13.7539	18.8825	7.81714	15.666	1.99859	1.59688	2.88693	4.37868
ENSDARG00000045853	NA	-4.17959	4.77041e-138	-1.63184	6.23164e-53	459.771	473.033	420.501	407.344	24.4515	36.8209	18.5657	16.5876	139.901	152.502	132.799	141.577
ENSDARG00000024775	si:ch211-129c21.1	-2.81868	6.17752e-138	-3.31553	3.72646e-179	629.757	665.298	594.113	534.047	75.6467	92.5243	86.9657	88.4671	61.9562	59.0847	60.6256	60.5718
ENSDARG00000099917	znf1005	-2.99198	6.35797e-138	-1.67049	4.87557e-65	571.476	593.58	481.378	485.497	64.9492	70.8094	67.4228	63.5857	162.552	176.456	160.947	167.12
ENSDARG00000015206	hnrnpua	-3.23346	6.60504e-138	0.179282	0.163019	1573.58	1501.5	1459.92	1392.55	151.293	223.758	122.143	131.779	1729.44	1735.81	1586.37	1658.06
ENSDARG00000059987	dnah12	-3.54321	8.27285e-138	-4.71506	1.30837e-176	569.857	662.246	629.061	518.653	51.1952	54.7593	44.9485	52.5273	15.9887	23.9533	26.7041	24.0828
ENSDARG00000055158	prox1a	-6.49498	8.79376e-138	-1.44839	6.40287e-35	841.834	869.77	667.39	670.222	4.58465	17.9384	4.88571	6.45072	274.472	283.447	273.537	282.425
ENSDARG00000044601	rtn4a	1.42174	1.64065e-137	-0.194226	0.00147753	1097.62	1033.04	969.52	960.336	2725.57	2558.58	2782.9	2780.26	938.003	904.635	873.298	821.733
ENSDARG00000054010	NA	-1.49646	1.9482e-137	-1.62125	1.01089e-164	1936.22	2047.77	1744.01	1850.81	697.631	675.05	676.182	630.328	625.557	581.266	619.969	630.53
ENSDARG00000016345	ncoa5	-1.02137	1.99701e-137	0.271382	6.04074e-13	2295.62	2308.71	2167.89	2169.34	1083.51	1092.35	1113.94	1108.6	2734.73	2650.03	2604.02	2781.92
ENSDARG00000007597	bloc1s4	4.85187	3.18811e-137	2.70483	6.68001e-42	21.0459	13.7332	32.6931	37.8924	754.939	663.72	890.177	875.455	183.204	182.843	169.607	182.445
ENSDARG00000100564	NA	-3.96641	4.71138e-137	-2.92091	1.07824e-93	969.728	972.006	767.725	755.48	50.4311	72.6977	57.6514	40.5474	123.912	113.379	121.973	96.331
ENSDARG00000098821	sec14l1	4.9323	8.73511e-137	3.03447	7.51649e-51	17.808	21.3628	27.0564	22.4986	738.892	600.464	668.365	767.636	171.878	182.045	195.59	195.581
ENSDARG00000056623	ptenb	3.74918	1.30493e-136	1.22859	1.88203e-14	51.8052	47.3033	66.5136	39.0766	709.092	618.402	706.474	741.833	135.904	118.169	103.93	124.792
ENSDARG00000008494	myl6	3.03308	1.55825e-136	4.14922	2.82318e-261	67.9943	71.7179	92.4426	119.598	762.58	823.278	675.205	683.777	1549.57	1660.76	1626.79	1550.78
ENSDARG00000035870	laptm4b	2.61996	1.73352e-136	-3.97703	3.0746e-91	246.075	204.472	218.706	197.751	1383.8	1149	1431.51	1350.97	10.6591	11.1782	18.7651	13.8658
ENSDARG00000021022	ift57	-2.07059	1.97166e-136	-0.146631	0.0713298	1299.99	1571.69	1332.53	1361.76	311.756	392.756	314.64	305.949	1226.47	1235.99	1284.69	1277.85
ENSDARG00000019335	hes6	1.10633	2.00338e-136	-0.987525	1.15567e-101	3853.01	3828.52	3701.09	3732.4	8074.33	7449.15	8533.38	8473.49	1890.66	1949.8	1889.5	1890.13
ENSDARG00000002787	tle3a	-1.26949	2.03076e-136	-0.447389	1.26716e-20	1853.65	1852.46	1793.61	1735.95	719.79	711.871	813.96	755.656	1277.1	1325.41	1320.77	1377.83
ENSDARG00000016239	psmd13	2.53704	2.17829e-136	-0.0304027	0.833283	407.966	378.426	322.422	425.106	2259.47	1844.82	2413.54	2375.71	354.416	372.873	383.241	388.973
ENSDARG00000020850	eef1a1l1	0.733361	3.00462e-136	-0.0307945	0.356189	111559	113963	117117	116895	188940	183312	193789	197987	111444	112356	110443	115605
ENSDARG00000060841	pik3c2a	-5.90398	3.58309e-136	-0.811656	1.88128e-20	579.57	598.158	538.873	516.284	5.34876	22.659	5.86285	3.68613	325.103	325.764	300.963	316.725
ENSDARG00000015222	cbll1	3.25817	3.65569e-136	2.25809	1.35004e-64	63.1376	68.6661	86.8059	84.0738	748.826	621.235	771.942	801.733	358.413	396.826	344.989	372.188
ENSDARG00000006019	tktb	1.27893	3.94395e-136	1.68357	7.28837e-242	995.631	918.599	989.812	991.124	2378.67	2223.42	2556.2	2304.75	3183.08	3036.48	3160.47	3143.89
ENSDARG00000003017	zgc:55512	2.41533	4.48933e-136	1.81136	7.70002e-76	106.848	108.34	147.683	152.754	712.149	716.591	676.182	699.443	445.018	445.531	497.996	456.843
ENSDARG00000087962	rpap3	-1.68596	5.0215e-136	-0.915959	3.60666e-48	1057.15	1133.75	1213.03	1135.59	353.018	340.829	345.908	373.22	574.26	570.886	617.804	647.315
ENSDARG00000099241	ppp2cb	0.719614	5.0955e-136	0.181136	1.14737e-09	2387.89	2468.93	2411.4	2439.33	4057.41	3891.69	4047.32	3986.55	2784.03	2740.25	2713.72	2767.33
ENSDARG00000018491	pdia4	-1.92642	5.64538e-136	-1.18582	6.7673e-57	2000.97	1925.7	1872.53	1663.71	481.388	545.705	431.897	501.313	869.385	826.388	795.35	784.514
ENSDARG00000005230	ssr2	-1.19003	6.45651e-136	0.317535	7.30431e-13	1945.93	2092.03	1957.08	1989.35	821.416	927.132	824.708	927.983	2472.92	2490.34	2482.04	2500.96
ENSDARG00000104076	rnf126	3.3146	1.17701e-135	0.291995	0.0582976	80.9456	70.192	90.1879	86.4421	777.098	707.15	944.897	863.475	102.594	105.394	101.764	94.8715
ENSDARG00000098378	NA	1.09359	1.78766e-135	-1.23288	5.06993e-142	1651.29	1583.9	1716.95	1625.82	3546.23	3328.04	3516.74	3659.4	673.523	733.768	705.856	690.372
ENSDARG00000025372	admp	6.11047	1.78766e-135	-0.462189	0.180338	14.5702	9.15548	11.2735	16.5779	900.883	823.278	981.051	911.395	12.6577	3.19377	10.826	10.2169
ENSDARG00000009754	zc3h11a	1.70964	2.5045e-135	0.135167	0.0787901	466.247	527.966	459.958	512.732	1607.68	1485.11	1629.87	1707.6	532.956	540.545	578.83	506.468
ENSDARG00000008678	snx3	1.28501	2.75543e-135	0.595699	8.74458e-30	2028.5	2046.25	1971.73	1972.77	4875.01	4373.19	5104.59	5179.93	2988.55	3056.44	3020.46	3047.56
ENSDARG00000039493	naa20	2.18267	4.30007e-135	0.775339	5.05637e-17	191.032	158.695	218.706	224.986	898.591	952.623	879.428	913.238	352.417	318.578	334.884	366.35
ENSDARG00000009505	prelid3b	2.51669	6.74524e-135	-0.835099	8.19037e-15	613.568	668.35	618.914	605.095	3658.55	2821.05	3993.58	3871.36	355.748	324.168	344.989	378.026
ENSDARG00000002347	cyp11a1	2.82361	6.88458e-135	1.94896	3.59583e-63	71.2321	102.236	87.9332	86.4421	660.189	641.061	586.285	581.487	357.747	337.741	342.102	309.427
ENSDARG00000077967	si:ch211-140m22.7	-3.385	8.57813e-135	-0.871146	5.0781e-18	526.146	494.396	477.996	414.449	46.6106	57.5917	34.2	43.312	245.826	254.703	277.146	264.91
ENSDARG00000002339	NA	-5.32264	1.14736e-134	-6.94785	9.63015e-110	597.378	567.64	559.165	472.471	12.9898	17.9384	9.77142	13.823	5.32956	3.99221	2.1652	5.83824
ENSDARG00000036028	arrdc3b	3.75604	1.90568e-134	3.42546	6.28575e-112	42.0917	106.814	90.1879	87.6263	1123.24	923.355	1228.27	1200.76	862.057	920.604	936.81	839.248
ENSDARG00000015016	kif26ab	-1.65411	2.2983e-134	-1.69314	7.25716e-142	6789.72	6654.51	6051.61	5910.04	2000.43	1764.57	2142.87	2159.15	1905.32	2024.85	1947.96	1974.06
ENSDARG00000045976	sidt2	-3.5095	2.43852e-134	-1.10666	4.98671e-30	430.631	411.996	403.591	412.08	29.0361	54.7593	31.2686	31.3321	186.535	200.409	181.155	201.419
ENSDARG00000045980	cst14b.1	1.40037	2.97154e-134	1.2353	3.46557e-105	1196.38	1129.18	987.558	986.387	2855.47	2891.86	2764.34	2785.79	2460.93	2620.49	2543.39	2453.52
ENSDARG00000011579	hoxb10a	5.14711	3.09912e-134	-2.50001	1.69611e-11	29.1404	27.4664	16.9102	21.3145	822.18	686.379	889.2	889.278	2.66478	6.38754	2.1652	5.10846
ENSDARG00000030237	pgrmc2	-2.59951	3.12603e-134	-0.280196	0.00397832	1136.48	1080.35	1003.34	930.733	194.083	201.099	148.526	137.308	835.409	868.705	833.602	875.007
ENSDARG00000058257	slc39a1	2.97796	3.58807e-134	3.65366	9.91193e-204	134.37	114.443	175.866	211.961	1225.63	1427.52	1262.47	1183.25	2027.9	2081.54	2065.6	1970.41
ENSDARG00000037533	mep1b	-3.9893	5.58566e-134	-10.4831	7.83107e-36	890.401	730.912	623.424	685.616	47.3747	46.2622	39.0857	50.6843	0	0.798442	0.721734	0
ENSDARG00000061478	igf2bp1	-1.40666	1.3739e-133	-0.87726	5.15102e-55	4296.59	4243.56	3678.54	3708.72	1493.83	1575.75	1453.99	1475.37	2189.78	2111.88	2193.35	2163.07
ENSDARG00000030297	NA	-1.33783	1.6564e-133	-1.61317	5.32409e-194	2880.04	2775.64	2591.77	2537.61	1051.41	1016.82	1133.49	1059.76	866.054	932.581	871.854	850.924
ENSDARG00000038012	NA	-3.43121	1.92505e-133	1.42958	1.10842e-71	386.92	413.522	373.152	330.375	36.6772	50.0387	24.4286	26.7244	989.3	1031.59	1003.21	1011.48
ENSDARG00000017659	sps2	-2.21237	3.68669e-133	-0.418435	3.82023e-07	1186.66	1120.02	990.94	1013.62	232.289	269.076	191.52	234.069	801.433	769.698	822.776	823.922
ENSDARG00000027649	NA	-1.86742	4.06664e-133	-0.898257	5.81904e-39	1003.73	883.503	945.846	833.634	257.504	267.188	249.171	228.54	484.324	482.259	490.779	506.468
ENSDARG00000044431	ppig	1.3347	4.10702e-133	1.78618	9.57677e-250	469.484	521.862	518.58	535.231	1253.14	1292.51	1357.25	1279.09	1741.43	1789.31	1724.22	1826.64
ENSDARG00000098387	tmem176l.3a	-3.43486	4.2841e-133	-5.44844	1.50441e-205	1045.82	1065.09	826.347	853.764	87.8724	103.854	79.1485	78.3302	25.9816	16.7673	16.5999	26.2721
ENSDARG00000078233	ctnnd1	-1.62777	4.88599e-133	-0.245066	0.000225202	5004.06	5078.24	4685.26	4492.62	1536.62	1794.78	1468.64	1428.37	4069.12	4070.46	4002.01	4101.37
ENSDARG00000075008	pask	-3.04089	5.8787e-133	-3.69902	6.31978e-173	547.192	552.38	543.382	457.078	67.2415	67.9771	59.6057	58.978	43.9689	40.7206	40.4171	35.7592
ENSDARG00000077404	ncoa3	-2.6059	6.12392e-133	0.271899	0.00691926	1497.49	1405.37	1238.96	1211.37	215.478	277.573	194.451	189.836	1588.21	1584.91	1703.29	1577.79
ENSDARG00000061845	si:dkeyp-110e4.6	5.98355	6.18773e-133	4.50768	3.18191e-75	16.1891	6.10365	16.9102	20.1304	987.992	754.357	1084.63	1084.64	344.423	371.276	365.197	324.752
ENSDARG00000021137	adgrv1	2.41991	1.12765e-132	0.823507	2.43326e-15	158.653	166.324	147.683	132.624	791.616	740.195	809.074	878.22	247.825	255.502	274.981	286.074
ENSDARG00000076745	zgc:193811	-6.67416	1.39466e-132	-1.33703	1.21241e-75	658.897	675.979	696.702	667.854	2.29232	18.8825	0.977142	4.60766	261.815	275.463	269.928	262.721
ENSDARG00000068572	slc16a1b	-4.11601	1.53469e-132	-1.16081	2.64685e-22	534.241	534.069	484.76	502.075	30.5643	48.1504	20.52	18.4306	219.844	258.695	212.911	226.962
ENSDARG00000099766	myl12.1	1.01595	1.68038e-132	0.109643	0.012075	4314.4	4029.94	3981.8	3911.21	8092.67	7720.12	8450.33	8546.29	4374.24	4432.95	4424.95	4272.14
ENSDARG00000027966	ap1s3b	5.1722	1.86911e-132	4.21339	1.93222e-87	4.85674	13.7332	25.929	18.9462	614.343	608.017	633.188	610.054	315.11	293.827	316.119	342.267
ENSDARG00000063719	usp8	-4.47241	3.07899e-132	-1.67586	2.39925e-48	487.292	480.663	432.902	408.528	9.9334	31.1562	22.4743	19.3522	143.898	135.735	149.399	135.009
ENSDARG00000007812	sp3b	-3.03979	3.67172e-132	0.613068	6.06917e-13	498.625	463.877	399.081	380.108	52.7235	51.9269	52.7657	52.5273	661.532	669.893	645.952	669.209
ENSDARG00000061248	xylt1	-4.78965	4.38123e-132	0.111878	0.251694	441.963	427.256	404.718	376.556	12.9898	24.5473	12.7029	9.21532	413.041	470.283	433.04	462.681
ENSDARG00000024295	slc11a2	2.66695	7.38659e-132	2.51721	1.94932e-118	61.5186	74.7697	82.2965	100.652	531.819	505.107	504.205	526.195	476.33	473.476	468.405	446.626
ENSDARG00000103834	rbm14b	-2.01566	1.58342e-131	-1.98914	3.32884e-135	1154.28	1124.6	1057.45	947.311	281.956	253.026	260.897	258.95	260.482	279.455	287.972	248.855
ENSDARG00000002690	rabif	3.44552	2.61969e-131	1.73107	2.67167e-32	55.043	53.4069	73.2777	59.2069	714.441	585.358	706.474	656.131	212.516	195.618	223.737	178.796
ENSDARG00000037574	rps6kal	-3.30222	4.35351e-131	-0.797124	7.28504e-18	409.585	390.634	395.699	396.686	35.9131	50.0387	36.1543	39.6259	216.513	209.99	254.772	234.26
ENSDARG00000088841	dnal4b	-1.427	5.10683e-131	-0.258801	2.02473e-06	1489.4	1489.29	1340.42	1333.34	533.347	536.263	547.2	479.197	1154.52	1192.87	1168.49	1196.11
ENSDARG00000093440	tnfaip6	-1.71098	6.20981e-131	-0.737082	3.96179e-30	1130	1110.86	1127.35	1074.01	312.52	401.253	320.503	324.379	669.526	660.312	683.482	650.234
ENSDARG00000071697	zgc:66433	-1.2673	6.55316e-131	-1.15956	3.23676e-117	1691.76	1667.82	1541.09	1555.96	665.538	658.056	644.914	706.815	738.811	688.257	725.342	729.051
ENSDARG00000077307	tmem201	-1.98409	8.46e-131	-0.429803	2.34066e-09	895.258	865.193	847.766	747.191	210.894	194.49	237.446	203.659	608.236	658.715	608.421	610.826
ENSDARG00000007285	mrpl57	2.33586	9.51962e-131	1.28048	3.25412e-38	127.894	115.969	133.027	134.992	656.369	671.273	614.623	656.131	286.464	305.005	326.224	333.51
ENSDARG00000073847	rbm15	-3.57438	1.03095e-130	-1.33799	4.02451e-41	409.585	430.307	376.534	362.346	24.4515	36.8209	34.2	37.7828	152.559	162.882	148.677	158.362
ENSDARG00000100114	sf3a3	1.01179	1.03557e-130	-0.875368	1.89836e-79	1204.47	1149.01	1091.27	1090.59	2273.99	2267.79	2319.74	2252.22	596.911	630.769	624.3	613.016
ENSDARG00000101216	meaf6	-1.25283	1.46045e-130	-0.306696	6.84282e-11	1312.94	1355.01	1259.25	1274.13	545.573	503.219	564.788	564.899	1073.24	1027.6	1034.97	1060.37
ENSDARG00000019181	rpsa	1.26133	1.60404e-130	-0.195443	0.0002653	7539.27	7783.68	7729.1	7526.39	18457	16226.7	19036.7	19589	6574.01	6678.97	6600.98	6850.45
ENSDARG00000007886	slc35b2	-2.92495	1.71516e-130	-2.08598	7.36417e-81	820.788	781.267	755.324	740.087	100.098	135.01	93.8057	78.3302	186.535	200.409	173.938	167.85
ENSDARG00000063341	NA	1.88134	1.85662e-130	1.30571	4.0993e-62	200.745	210.576	188.267	184.726	712.913	692.044	757.285	713.266	493.651	481.461	468.405	484.574
ENSDARG00000075014	sqstm1	2.4632	1.8888e-130	-2.78395	2.60556e-96	354.542	332.649	341.587	317.349	1906.45	1518.15	1983.6	2010.78	45.3013	52.6972	48.3562	48.8953
ENSDARG00000018559	kdm7ab	-2.42437	1.93909e-130	-0.264999	0.00390316	1070.1	1020.84	883.841	965.073	205.545	213.372	146.571	164.033	818.754	804.031	837.211	812.246
ENSDARG00000019191	sept12	-2.02324	1.95155e-130	-1.5785	2.07577e-86	1659.38	1492.34	1359.58	1327.42	360.659	362.544	324.411	384.279	484.99	454.314	503.048	507.197
ENSDARG00000025699	mbd1b	-3.96713	2.04193e-130	-1.27002	1.07149e-22	639.47	653.091	668.518	569.571	35.9131	65.1447	27.36	33.1751	267.144	286.641	256.937	237.908
ENSDARG00000054818	rpl32	1.40488	2.22349e-130	-0.109938	0.0762767	6622.97	7145.85	7761.8	7758.48	19520.7	21060.6	18210	18819.5	6808.52	6595.93	6808.84	6940.94
ENSDARG00000057854	NA	0.728194	2.44281e-130	-0.208374	2.10466e-11	3333.34	3411.94	3539.88	3533.47	5730.81	5590.17	5703.58	5901.49	2973.23	3055.64	2952.61	2999.4
ENSDARG00000005108	oclna	-2.31868	4.10508e-130	-3.88198	0	2133.73	2160.69	2043.88	1879.23	425.608	486.225	395.743	337.281	135.238	152.502	134.242	135.009
ENSDARG00000044373	atg4c	-2.26395	4.45928e-130	-2.42183	4.10075e-151	1635.1	1620.52	1350.56	1315.58	294.182	304.009	336.137	296.733	304.451	260.292	262.711	273.668
ENSDARG00000024026	sdf2	5.22644	1.44224e-129	2.65817	1.13891e-32	4.85674	18.311	28.1837	15.3938	669.359	600.464	728.948	654.288	107.924	118.169	107.538	113.846
ENSDARG00000077300	usp42	-3.55355	2.37402e-129	0.666319	1.43237e-10	477.579	564.588	426.138	447.604	33.6208	58.5358	32.2457	38.7043	776.784	756.923	721.734	775.757
ENSDARG00000045873	frs2a	-3.56568	2.46733e-129	-3.94809	2.18605e-153	506.719	508.129	425.01	441.684	40.4977	40.5974	35.1771	41.4689	33.976	31.1393	23.0955	32.8401
ENSDARG00000055360	llph	1.40772	2.90264e-129	1.04566	1.3584e-71	618.424	505.077	543.382	503.259	1476.26	1421.85	1458.87	1377.69	1091.23	1150.56	1117.97	1104.89
ENSDARG00000035564	NA	-6.44144	4.13834e-129	-4.15642	7.53618e-140	849.929	862.141	661.754	717.588	4.58465	19.8266	6.84	4.60766	46.6337	40.7206	37.5302	47.4357
ENSDARG00000010194	eif4bb	-1.23435	4.23631e-129	-0.373812	4.26826e-14	2967.47	2885.5	2934.49	2934.3	1277.59	1358.6	1113.94	1228.4	2223.76	2214.08	2295.83	2311.94
ENSDARG00000097873	NA	-6.72485	4.3985e-129	-3.83888	3.28257e-157	775.459	766.008	750.814	796.925	2.29232	18.8825	5.86285	2.7646	68.6181	47.1081	45.4692	53.274
ENSDARG00000039958	utp11l	2.15663	5.47025e-129	2.42901	2.77324e-168	139.226	120.547	158.956	146.833	621.22	608.961	636.12	682.855	756.132	804.83	751.325	766.999
ENSDARG00000097264	NA	3.42161	6.19597e-129	0.267914	0.109933	55.043	62.5624	67.6409	71.0483	728.195	612.738	729.925	705.893	88.604	59.0847	81.5559	81.0056
ENSDARG00000095459	NA	1.62195	7.22435e-129	0.314181	1.00326e-05	412.822	468.455	474.614	423.922	1384.56	1291.56	1443.24	1369.4	563.601	594.041	538.413	521.793
ENSDARG00000001788	atp5o	1.4368	8.09343e-129	1.01284	2.66498e-64	744.699	721.757	783.507	837.186	2071.5	1933.57	2211.27	2169.29	1604.86	1517.04	1527.19	1598.95
ENSDARG00000038792	klf17	4.10197	8.41315e-129	2.22988	6.64654e-37	27.5215	25.9405	40.5846	30.7876	566.204	597.632	550.131	482.883	151.893	157.293	147.234	143.767
ENSDARG00000076796	dlg3	-2.27199	9.73956e-129	0.242236	0.0013128	550.43	534.069	563.674	564.834	113.852	142.563	98.6914	103.212	642.878	625.18	656.056	696.211
ENSDARG00000071051	cbx6a	-3.57596	1.38856e-128	-3.1984	3.27035e-130	485.674	483.714	411.482	439.315	39.7336	45.318	37.1314	29.489	45.9675	43.1159	57.017	51.0846
ENSDARG00000021483	cdc14b	-3.42504	1.48032e-128	-0.921122	1.45714e-15	637.851	715.653	498.288	589.701	67.2415	55.7034	58.6285	43.312	317.775	316.183	321.893	329.131
ENSDARG00000102252	NA	-4.61578	2.476e-128	-1.65979	2.96813e-26	938.969	912.496	730.522	712.851	32.0925	52.871	31.2686	17.5091	251.822	248.316	289.415	250.315
ENSDARG00000013542	lpgat1	-3.22147	2.47975e-128	-0.959667	6.96244e-19	615.186	590.528	565.929	511.548	61.1286	86.8596	44.9485	50.6843	298.455	281.052	293.746	297.75
ENSDARG00000052109	zgc:114041	3.98237	5.06885e-128	5.4775	1.52602e-247	29.1404	28.9923	27.0564	29.6035	449.296	468.286	444.6	458.001	1293.08	1318.23	1200.96	1318.71
ENSDARG00000002538	smu1a	2.68018	5.6617e-128	2.31921	5.10664e-96	262.264	262.457	324.676	280.641	1877.41	1419.97	1990.44	1992.35	1387.02	1435.6	1392.22	1453.72
ENSDARG00000045155	phf5a	1.40665	5.87487e-128	0.516251	1.17517e-17	560.143	538.647	618.914	584.964	1506.82	1633.34	1511.64	1479.98	822.751	813.613	801.124	869.169
ENSDARG00000038141	atf4b	1.64752	5.98943e-128	1.86237	1.73633e-169	223.41	274.664	241.253	267.615	805.37	787.401	791.485	775.93	928.676	887.069	935.367	916.604
ENSDARG00000003520	NA	-6.15232	6.07245e-128	-2.55592	5.23694e-106	629.757	610.365	565.929	588.517	3.82054	19.8266	5.86285	4.60766	110.588	106.991	104.651	83.9248
ENSDARG00000070358	smim12	2.66199	6.80864e-128	2.34208	3.76994e-99	76.0889	102.236	73.2777	74.6007	502.019	511.716	522.771	509.607	404.381	382.454	422.936	427.651
ENSDARG00000018903	aimp2	3.20659	6.80864e-128	2.83259	9.13157e-100	40.4728	42.7256	59.7495	69.8642	472.219	485.281	531.565	537.253	407.711	383.252	379.632	390.433
ENSDARG00000063895	mt-nd1	0.805305	1.13521e-127	0.436115	2.83417e-38	4874.54	4712.02	4643.55	4524.59	8409.01	7771.1	8219.72	8340.79	6350.84	6221.46	6347.65	6430.83
ENSDARG00000051763	sntb2	-6.15836	1.1963e-127	-3.70791	2.14568e-83	1189.9	1036.09	841.002	853.764	6.11286	28.3238	6.84	13.823	77.2786	67.8676	75.782	77.3567
ENSDARG00000103980	ets2	-4.83419	1.81227e-127	-3.87371	5.6465e-99	1130	1155.12	1113.82	1114.27	26.7438	67.9771	37.1314	26.7244	77.2786	67.8676	67.843	93.4119
ENSDARG00000057026	ran	1.15177	1.91083e-127	-0.29686	1.54172e-09	4903.68	5166.74	5253.45	5303.76	11495.2	10434.5	11943.6	11983.6	4150.4	4330.75	4248.85	4069.99
ENSDARG00000030440	rsrp1	5.03921	2.20329e-127	5.09735	9.23504e-131	22.6648	18.311	18.0376	11.8414	566.968	528.71	631.234	575.036	603.573	617.994	599.039	575.067
ENSDARG00000095579	FIS1	1.9931	2.66979e-127	1.30977	7.56318e-55	309.212	302.131	341.587	336.295	1373.1	1113.12	1353.34	1313.18	829.413	760.117	811.95	807.137
ENSDARG00000015482	NA	-5.06717	2.80146e-127	-5.50749	3.69155e-142	642.708	698.868	605.386	592.069	16.0463	31.1562	12.7029	15.666	11.3253	19.9611	17.3216	7.29781
ENSDARG00000038862	kcnb2	5.12956	4.6607e-127	0.111386	0.709935	25.9026	18.311	32.6931	24.8669	941.381	692.988	1034.79	970.373	28.6464	28.7439	31.7563	22.6232
ENSDARG00000038306	tsc22d1	-4.16702	5.43554e-127	-0.468741	0.00540949	2102.97	2034.04	2076.58	1960.93	80.2313	184.105	87.9428	102.29	1442.98	1461.95	1458.62	1540.57
ENSDARG00000040555	bckdha	-3.25785	7.19084e-127	-1.71477	5.74124e-46	867.737	831.622	747.432	736.534	73.3544	119.904	66.4457	72.801	241.829	238.734	233.842	253.234
ENSDARG00000027724	dgkb	-3.05892	7.6455e-127	-0.789302	5.69827e-13	898.496	683.609	654.99	622.857	83.2878	82.1389	85.0114	91.2317	419.703	415.988	423.658	389.703
ENSDARG00000088283	si:ch73-248e21.5	-3.38161	8.6984e-127	-2.60688	6.29236e-112	417.679	410.471	393.445	362.346	33.6208	43.4298	43.9714	31.3321	66.6195	63.0769	66.3995	62.7611
ENSDARG00000003641	NA	1.54549	1.09107e-126	1.36564	9.74176e-100	500.244	474.559	552.401	590.885	1639.78	1452.07	1516.52	1608.07	1376.36	1367.73	1371.29	1375.64
ENSDARG00000003109	rcan1a	3.99421	1.6134e-126	2.04579	3.00539e-32	30.7593	30.5183	40.5846	41.4449	589.127	520.213	633.188	591.623	146.563	154.898	172.494	130.631
ENSDARG00000104760	MAP3K6	-3.76424	1.6161e-126	-1.80312	2.77981e-39	942.207	805.682	836.493	775.611	41.2618	91.5802	53.7428	61.7426	225.84	232.347	243.946	259.072
ENSDARG00000031427	calm2a	-2.31103	1.80527e-126	0.150693	0.113487	1455.4	1312.28	1279.54	1235.06	236.109	323.835	277.508	227.618	1467.63	1569.74	1398.72	1422.34
ENSDARG00000057042	tm2d1	-4.24369	1.92263e-126	-0.777988	2.1596e-16	382.063	355.538	356.242	357.61	12.2257	27.3796	19.5428	18.4306	205.854	203.603	202.807	232.8
ENSDARG00000056324	zgc:123295	2.83317	2.39392e-126	2.41814	8.18961e-92	67.9943	56.4588	66.5136	66.3118	461.521	473.951	465.12	442.335	339.76	345.726	341.38	355.403
ENSDARG00000097691	NA	1.43554	2.89714e-126	0.192474	0.00281869	561.762	569.165	616.66	607.463	1543.5	1686.21	1513.59	1650.46	647.542	682.668	659.665	711.536
ENSDARG00000032327	usp36	-2.72498	3.65535e-126	-0.527826	4.73565e-08	683.181	709.549	617.787	587.333	93.9853	125.569	73.2857	98.6039	440.355	451.918	451.084	453.924
ENSDARG00000023394	slc37a2	-2.01711	4.24727e-126	0.529029	1.43927e-13	793.267	779.741	701.211	825.345	197.14	219.037	186.634	161.268	1117.21	1073.11	1112.91	1164
ENSDARG00000062089	uggt2	-5.97051	4.53941e-126	-1.12332	6.3919e-29	587.665	570.691	533.236	479.576	4.58465	19.8266	6.84	3.68613	236.499	255.502	261.268	240.828
ENSDARG00000006219	gnl3	2.90636	4.87371e-126	2.12329	1.04811e-66	85.8023	94.6066	95.8246	103.02	713.677	601.408	768.034	779.616	424.366	442.337	393.345	403.569
ENSDARG00000009285	rpl15	1.09548	6.57666e-126	0.0935299	0.0570877	3477.42	3558.43	4061.84	3921.87	8127.05	8071.33	7815.18	8136.21	4092.44	3961.07	3991.19	4007.23
ENSDARG00000053840	ei24	-2.69878	6.79466e-126	-2.00691	8.61451e-83	845.072	738.542	764.342	730.614	115.38	136.898	116.28	105.055	159.887	200.409	220.129	185.364
ENSDARG00000053291	pnrc2	-1.19721	8.4963e-126	-0.869825	2.01936e-67	24874.6	24259	22565	21848.5	10057.2	9474.3	10777.9	10477.8	12423.9	12924.4	12993.4	12836.1
ENSDARG00000074381	farp1	-3.76007	1.1649e-125	-3.92813	4.80761e-141	752.794	785.845	824.092	753.112	44.3183	86.8596	50.8114	48.8412	60.6238	47.9065	46.9127	48.1655
ENSDARG00000035692	rps3a	0.683818	1.37198e-125	-0.355155	1.37843e-33	6043.4	6163.16	6363.88	6094.76	10233.7	9638.58	9780.22	9981.11	4717.99	4832.97	4816.13	4927.48
ENSDARG00000103007	rps3	1.05456	1.37198e-125	-0.0432964	0.394843	4175.17	4544.17	4628.89	4856.15	9487.93	9749.99	9117.71	9497.31	4334.27	4368.28	4376.59	4605.65
ENSDARG00000098296	gnsb	-3.22551	1.6153e-125	-0.252787	0.0417094	977.823	935.385	818.455	759.033	88.6365	124.625	63.5143	94.9178	718.825	741.753	733.281	730.51
ENSDARG00000037503	NA	-2.01514	1.74134e-125	-1.62946	3.92567e-89	1442.45	1452.67	1277.29	1169.93	316.341	347.438	301.937	352.947	421.035	412.795	435.927	452.464
ENSDARG00000024844	max	-1.08021	2.1139e-125	0.512463	6.06775e-34	2520.65	2642.88	2317.83	2384.86	1200.41	1156.55	1122.74	1173.11	3501.52	3450.07	3514.12	3578.84
ENSDARG00000009629	unc119.1	-1.91642	2.12665e-125	0.328045	1.82754e-05	1772.71	1818.89	1650.44	1650.69	414.911	554.202	436.783	420.219	2167.13	2138.23	2253.25	2086.44
ENSDARG00000077082	agtrap	-4.81659	2.42643e-125	-2.6691	1.61809e-64	768.983	697.342	642.589	548.256	25.9797	30.212	14.6571	22.1168	127.909	110.185	88.0515	89.763
ENSDARG00000024317	trap1	-3.20893	2.45698e-125	-2.24076	8.88152e-84	590.903	576.795	481.378	457.078	51.9593	65.1447	53.7428	56.2134	104.593	114.976	111.147	113.116
ENSDARG00000017049	adsl	2.35758	2.73151e-125	2.28434	6.80633e-119	145.702	126.651	109.353	137.36	670.123	591.023	690.84	690.227	632.885	604.421	615.639	658.262
ENSDARG00000020735	NA	-3.19936	3.27559e-125	-3.69311	1.41459e-158	772.221	715.653	587.349	685.616	67.2415	69.8653	85.0114	78.3302	51.297	44.7128	49.7996	66.41
ENSDARG00000009953	med14	-2.86098	3.35006e-125	-0.212487	0.0360464	663.754	537.121	562.547	519.837	74.1185	101.021	66.4457	71.8795	476.996	519.786	485.005	484.574
ENSDARG00000086332	bri3	3.27502	4.1757e-125	2.88789	2.47322e-97	90.6591	67.1402	92.4426	84.0738	792.38	652.391	937.079	877.298	624.891	628.374	636.569	601.339
ENSDARG00000040245	kpnb3	1.62883	4.21977e-125	-0.452703	4.09629e-10	853.166	901.814	899.624	864.421	2693.48	2385.81	2849.35	2960.88	659.533	654.723	641.621	615.935
ENSDARG00000063672	NA	-1.38971	4.38854e-125	-0.908311	1.12489e-60	1367.98	1455.72	1400.17	1321.5	566.968	532.487	505.183	505.921	752.134	697.839	775.142	725.402
ENSDARG00000013009	ubiad1	-2.5293	4.42918e-125	-0.257614	0.00397617	624.9	636.306	578.33	510.364	96.2776	118.016	100.646	91.2317	455.678	499.026	490.779	514.495
ENSDARG00000052480	pdcd11	-2.305	4.78317e-125	-1.97514	3.36135e-99	1188.28	1297.03	1226.56	1160.46	243.75	301.176	220.834	219.325	321.772	289.835	285.807	340.078
ENSDARG00000039576	fstl1b	-1.78114	4.86797e-125	-2.77164	4.81636e-288	4165.46	4332.07	3728.14	3603.33	1156.1	1027.21	1237.06	1180.48	558.272	626.777	577.387	553.903
ENSDARG00000027851	ccdc191	-3.88326	4.95186e-125	-2.61298	8.89117e-93	509.957	410.471	449.812	408.528	27.5079	35.8768	34.2	23.0383	82.6082	71.0614	66.3995	69.3292
ENSDARG00000004460	desi2	2.31247	5.86914e-125	2.77289	5.95797e-185	97.1347	103.762	144.301	151.57	638.03	665.609	590.194	631.249	894.034	867.907	866.802	846.545
ENSDARG00000040001	fryl	3.49644	6.31442e-125	2.46954	1.51492e-61	51.8052	57.9847	57.4948	47.3655	588.363	506.051	666.411	666.268	287.796	305.005	300.963	297.021
ENSDARG00000035515	tm2d2	-5.55153	9.13997e-125	-1.09301	1.27935e-32	492.149	454.722	463.34	416.817	10.6975	17.9384	3.90857	5.52919	223.842	207.595	215.798	206.528
ENSDARG00000014209	ODF3L2 (1 of many)	2.35135	1.04316e-124	-0.222584	0.0544342	169.986	169.376	161.211	174.068	870.319	760.965	876.497	933.512	129.908	157.293	149.399	142.307
ENSDARG00000045909	NA	-2.17276	1.09684e-124	-1.29242	1.83161e-49	1733.85	1533.54	1358.46	1462.41	329.331	282.294	373.268	363.084	610.235	620.39	635.126	615.205
ENSDARG00000063009	catip	-2.68746	1.29283e-124	-2.42141	2.01731e-115	686.419	587.476	630.188	595.622	94.7494	118.016	94.7828	80.1733	124.579	101.402	121.251	117.495
ENSDARG00000059327	gata2a	4.25743	1.48134e-124	-1.5185	1.43817e-08	27.5215	19.8369	30.4384	33.1559	546.337	586.302	519.84	512.372	9.99293	10.3798	11.5477	7.29781
ENSDARG00000031511	psmb2	1.35446	1.99708e-124	0.441323	1.44837e-13	450.057	396.737	430.647	425.106	1105.66	1067.81	1072.9	1105.84	566.932	590.049	562.952	593.312
ENSDARG00000004537	kmt2a	-3.72551	2.31736e-124	-3.33307	1.7004e-109	1209.33	1158.17	972.902	946.127	73.3544	118.016	68.4	63.5857	114.586	101.402	104.651	102.899
ENSDARG00000010432	eaf2	-1.66191	3.03282e-124	-0.855288	4.12539e-41	940.588	932.333	891.733	818.24	294.946	258.69	285.326	288.439	501.645	508.608	492.944	472.168
ENSDARG00000033367	rrm2b	2.44201	3.07848e-124	2.62572	5.31847e-146	118.181	86.977	145.428	149.201	681.584	742.083	674.228	670.875	806.762	779.28	815.559	742.187
ENSDARG00000010266	igf2bp3	-1.12907	3.10314e-124	-0.741838	4.89683e-61	1542.82	1539.65	1483.59	1613.98	741.185	714.703	686.931	678.247	934.672	927.79	928.149	904.198
ENSDARG00000096877	NA	-2.04109	3.78045e-124	-1.36538	7.6093e-63	1343.7	1240.57	1120.58	1122.56	278.135	325.723	281.417	285.675	451.68	520.584	454.692	443.707
ENSDARG00000061854	lman2	-1.51593	3.82344e-124	-2.50533	0	3615.03	3649.98	3123.88	3158.1	1237.85	1104.63	1197.98	1187.85	606.238	620.39	586.769	569.229
ENSDARG00000054007	ppp1r2	-4.5148	3.83526e-124	-1.58558	1.51943e-34	563.381	498.973	445.303	435.763	16.0463	36.8209	16.6114	15.666	156.556	163.681	168.164	156.903
ENSDARG00000010113	ndufb8	1.45795	4.47348e-124	1.43936	6.13823e-123	432.249	445.567	544.509	490.233	1292.11	1390.7	1323.05	1293.83	1288.42	1319.83	1291.9	1330.39
ENSDARG00000042899	si:ch211-163l21.8	2.86937	4.86136e-124	1.98498	1.1204e-58	105.229	106.814	87.9332	76.969	735.072	587.246	716.245	682.855	375.734	345.726	361.589	391.162
ENSDARG00000012368	ttc21b	-4.73531	5.43195e-124	-0.280519	0.00368821	398.252	370.797	393.445	371.82	16.0463	24.5473	5.86285	10.1369	341.758	307.4	289.415	323.293
ENSDARG00000079369	si:ch211-212g7.6	-3.13412	5.9143e-124	-0.655496	2.15107e-09	663.754	701.92	509.562	544.704	72.5903	73.6418	69.3771	58.0565	393.721	368.082	398.397	369.269
ENSDARG00000037284	NA	2.13197	6.40374e-124	-1.15334	2.1528e-32	561.762	604.261	632.443	575.491	2677.43	2162.05	2827.85	2753.54	249.157	281.052	254.772	283.885
ENSDARG00000030465	tmem263	3.18217	6.61731e-124	0.478208	0.000989133	108.467	91.5548	120.626	171.7	1170.61	1014.94	1229.25	1116.9	187.201	162.882	173.938	170.039
ENSDARG00000045620	nansa	2.51864	6.91437e-124	2.07385	7.34708e-84	89.0401	122.073	137.537	130.255	689.99	621.235	761.194	715.109	512.304	530.964	500.883	503.549
ENSDARG00000025436	msrb1a	-2.69144	8.47133e-124	-1.4136	4.71275e-47	621.662	631.728	595.24	547.072	84.0519	120.848	82.08	83.8594	242.495	217.176	213.633	223.313
ENSDARG00000091757	adgrf6	-6.45361	9.44788e-124	-3.6686	2.25013e-105	919.542	862.141	698.956	650.092	3.05643	11.3295	11.7257	10.1369	57.2928	76.6505	51.9648	59.842
ENSDARG00000035910	znf281b	-1.95792	1.01413e-123	0.523463	6.67933e-14	733.367	740.068	792.526	744.823	188.735	235.087	194.451	158.503	1066.58	1113.83	1085.49	1068.4
ENSDARG00000008740	esf1	-3.38514	1.32262e-123	-1.14531	2.97781e-28	429.012	450.144	404.718	370.635	36.6772	47.2063	44.9485	29.489	194.529	166.076	191.259	192.662
ENSDARG00000016280	eif1ad	1.93735	2.13163e-123	-0.565291	2.43377e-09	233.123	230.413	219.833	201.304	807.662	844.048	826.662	896.651	159.887	150.107	150.121	134.28
ENSDARG00000094729	apela	1.80714	2.28081e-123	1.77719	2.20234e-121	233.123	210.576	232.234	228.539	775.57	756.245	862.817	779.616	776.117	802.435	783.803	745.106
ENSDARG00000067717	tomm7	3.5881	2.32111e-123	1.5969	5.91955e-24	40.4728	39.6737	58.6221	78.1531	660.953	728.865	601.92	694.835	185.202	174.859	159.503	155.443
ENSDARG00000028431	adnp2b	-1.78216	2.58279e-123	-1.80197	5.13044e-132	1207.71	1124.6	1037.16	1027.83	319.397	317.226	339.068	299.498	299.122	338.54	322.615	298.48
ENSDARG00000059510	coq2	-3.08253	3.18769e-123	-1.86955	2.04707e-54	1074.96	1016.26	909.77	911.787	98.5699	154.837	99.6685	108.741	247.825	297.819	281.476	242.287
ENSDARG00000017703	paqr3a	-4.10928	3.26668e-123	-1.16288	5.58013e-22	501.863	447.092	409.228	457.078	26.7438	43.4298	17.5886	16.5876	203.856	214.781	202.085	188.283
ENSDARG00000099644	NA	-1.4756	4.40751e-123	0.354858	8.9475e-11	1091.15	1036.09	979.666	988.756	399.628	342.718	369.36	352.947	1267.77	1336.59	1278.19	1342.8
ENSDARG00000016745	slc35f6	1.60805	4.55229e-123	2.60946	0	320.545	260.931	251.399	287.746	880.252	795.898	842.297	874.534	1690.8	1687.91	1700.4	1720.09
ENSDARG00000101867	NA	-3.64723	4.64945e-123	0.812551	2.87209e-23	330.258	321.968	316.785	337.48	16.8104	34.9327	22.4743	31.3321	598.243	532.561	581.717	580.176
ENSDARG00000003952	pfn2	1.18836	7.98491e-123	1.91421	0	647.565	666.824	665.136	683.248	1622.97	1448.29	1513.59	1484.59	2546.86	2527.87	2491.42	2484.17
ENSDARG00000012513	sdcbp2	-1.10405	1.31029e-122	-0.686974	6.07231e-51	3547.04	3439.41	3191.52	3284.8	1580.18	1456.79	1551.7	1664.29	2120.5	2101.5	2074.26	2055.06
ENSDARG00000086341	NA	1.91211	1.68785e-122	1.12429	5.9481e-42	237.98	247.198	245.762	255.774	981.879	1004.55	889.2	843.202	554.941	537.352	537.692	524.712
ENSDARG00000000690	sypl2b	-1.56839	1.91271e-122	-0.897828	3.47883e-42	5803.8	5771	5003.17	4740.11	1830.8	1708.87	1870.25	1770.26	2782.7	2951.84	2919.41	2777.54
ENSDARG00000016706	atic	2.15831	1.94546e-122	3.28927	1.80294e-295	169.986	154.117	181.503	209.593	797.729	726.977	851.091	846.888	1831.37	1842.8	1716.28	1667.55
ENSDARG00000016212	NA	-3.47132	2.09344e-122	0.167253	0.0720626	338.353	355.538	331.441	349.321	23.6873	39.6533	19.5428	41.4689	363.743	381.655	401.284	396.271
ENSDARG00000056647	NA	-3.53897	2.97933e-122	-1.58101	3.05604e-49	401.49	360.115	369.77	402.607	27.5079	47.2063	28.3371	29.489	124.579	137.332	132.799	118.224
ENSDARG00000009724	rpn2	4.06285	4.40303e-122	3.44294	1.72613e-87	30.7593	47.3033	42.8393	39.0766	665.538	528.71	772.92	733.539	411.709	453.515	448.918	442.977
ENSDARG00000037091	asah1a	1.8239	5.47779e-122	2.74521	2.84839e-292	220.172	225.835	183.758	209.593	736.6	721.312	793.44	699.443	1389.68	1419.63	1433.36	1344.26
ENSDARG00000014222	zgc:86598	2.05371	5.53433e-122	-0.0831907	0.415893	828.883	770.586	869.186	908.234	3388.82	2972.11	3860.69	3827.12	816.089	764.109	765.038	846.545
ENSDARG00000075445	psmb5	1.79332	9.63636e-122	1.11569	2.21189e-47	573.095	547.803	640.334	635.882	2116.58	1799.5	2248.4	2174.82	1301.75	1316.63	1317.89	1277.12
ENSDARG00000025577	zgc:66447	-2.33232	1.23104e-121	0.0976633	0.282095	697.751	627.15	570.438	586.149	113.852	143.507	118.234	116.113	662.864	709.017	619.969	654.613
ENSDARG00000102741	sumo2b	1.15837	1.28734e-121	0.686951	2.34618e-43	1787.28	1683.08	1839.83	1758.45	4079.57	3598.06	4014.1	4096.21	2925.93	2807.32	2872.5	2781.92
ENSDARG00000051923	ccnb1	-1.91649	1.3052e-121	-1.31537	5.5105e-61	2381.42	2337.7	2557.95	2536.42	631.917	788.345	596.057	584.251	999.959	1017.22	983.001	944.336
ENSDARG00000045692	pphln1	-1.0795	1.75582e-121	0.318653	2.94659e-15	1325.89	1307.71	1324.63	1297.82	634.21	625.955	608.76	615.583	1697.47	1640	1622.46	1592.38
ENSDARG00000056691	cpeb4	-3.26277	2.18421e-121	-0.551036	1.11847e-05	1091.15	979.636	790.272	834.818	80.9954	128.401	83.0571	92.1532	625.557	673.087	610.587	607.907
ENSDARG00000078138	si:ch211-202h22.8	3.37568	2.23374e-121	1.51258	9.10363e-24	82.5645	53.4069	66.5136	33.1559	587.599	635.397	619.508	566.742	162.552	154.099	176.103	168.579
ENSDARG00000039093	got1	-2.95005	2.28553e-121	-6.66359	2.63761e-162	859.642	830.097	733.904	715.22	110.796	89.692	120.189	83.8594	8.66054	6.38754	6.4956	8.75737
ENSDARG00000015536	sox6	-2.67185	3.47847e-121	-2.38354	7.10944e-108	778.697	848.407	692.192	627.593	119.201	110.463	115.303	115.191	129.242	140.526	140.738	152.524
ENSDARG00000043137	cdca8	-1.00843	3.82418e-121	-0.761379	3.65529e-75	2190.39	2229.36	2094.61	2082.9	1055.23	1120.68	1051.41	1040.41	1229.8	1242.38	1283.96	1307.77
ENSDARG00000092456	NA	-3.59486	5.04466e-121	-9.7185	6.2122e-40	642.708	599.684	569.311	492.602	42.0259	40.5974	59.6057	48.8412	0.666195	0	0.721734	0.729781
ENSDARG00000018425	si:ch211-175g6.7	0.992241	6.36683e-121	0.947626	2.30115e-111	2370.09	2348.38	2253.57	2287.76	4753.52	4228.74	4782.13	4636.23	4431.53	4497.63	4455.98	4458.96
ENSDARG00000020473	hddc3	-2.83951	1.28201e-120	-0.693316	4.63511e-13	484.055	473.033	506.18	431.026	68.7697	85.9154	48.8571	59.8996	276.471	295.424	295.911	303.589
ENSDARG00000038432	actr10	-2.17013	1.39739e-120	0.544784	8.41499e-13	713.94	660.72	585.094	555.361	140.596	141.619	130.937	141.916	893.368	947.751	917.323	892.522
ENSDARG00000097824	smco4	4.97135	1.5323e-120	2.50125	1.19402e-29	9.71347	21.3628	21.4196	16.5779	573.845	537.208	564.788	551.076	85.9392	114.976	105.373	97.0608
ENSDARG00000068265	tomm5	1.65279	1.99815e-120	0.643802	2.79296e-18	268.739	300.605	293.111	273.536	889.422	949.791	878.451	857.946	453.679	429.562	428.71	463.411
ENSDARG00000043213	adam17a	-4.87843	2.43632e-120	-3.75199	7.21484e-105	689.656	685.135	594.113	504.443	27.5079	19.8266	12.7029	22.1168	56.6266	36.7283	49.0779	39.4082
ENSDARG00000058562	znf990	-2.71763	2.54764e-120	-3.63524	3.36366e-188	990.774	926.229	853.403	727.061	119.201	146.339	134.846	130.858	65.2871	67.8676	77.2255	70.0589
ENSDARG00000004094	acsbg2	-3.99159	2.71883e-120	-1.47497	5.42231e-34	448.439	485.24	400.209	408.528	29.0361	38.7092	13.68	26.7244	155.89	138.929	162.39	167.12
ENSDARG00000003808	aqp3a	-1.73501	3.00137e-120	-6.93967	0	4115.27	3990.26	3610.9	3327.43	1120.95	1129.17	1173.55	1091.09	35.3083	30.3408	33.1997	22.6232
ENSDARG00000099397	NA	-3.30448	3.33153e-120	-1.72754	5.44102e-42	968.109	932.333	749.687	705.747	65.7133	95.3567	78.1714	100.447	257.151	239.533	246.833	266.37
ENSDARG00000088546	myct1b	-5.46635	3.41395e-120	-2.41044	9.61412e-47	764.126	808.734	615.532	580.228	12.2257	31.1562	9.77142	9.21532	135.238	121.363	128.469	133.55
ENSDARG00000044565	ola1	1.70122	3.42568e-120	0.338918	6.77386e-06	1306.46	1214.63	1357.33	1265.84	4287.41	3549.91	4455.77	4448.23	1592.87	1708.67	1596.47	1613.54
ENSDARG00000041736	hsdl1	3.93179	3.57737e-120	1.19178	8.79112e-11	29.1404	38.1478	28.1837	27.2352	457.701	460.733	475.868	463.531	79.2772	69.4645	67.843	60.5718
ENSDARG00000070674	psmd6	1.46589	3.93634e-120	0.684208	1.0068e-26	849.929	877.4	946.973	1007.7	2569.7	2373.53	2705.71	2556.33	1478.29	1529.02	1387.89	1541.3
ENSDARG00000099921	tbce	-3.34243	5.30243e-120	-3.12405	3.92073e-122	563.381	521.862	447.557	441.684	51.9593	42.4857	44.9485	53.4489	57.2928	63.0769	54.8518	50.3549
ENSDARG00000095369	zgc:112966	-4.99922	5.51749e-120	-4.09915	6.0357e-119	615.186	675.979	489.269	503.259	13.7539	19.8266	11.7257	25.8029	29.9788	38.3252	33.9215	30.6508
ENSDARG00000068128	NA	-6.9976	6.17621e-120	-10.2019	1.10731e-42	828.883	877.4	670.773	748.376	3.82054	10.3854	5.86285	4.60766	0	0.798442	0	1.45956
ENSDARG00000056410	fdx1	1.19586	6.63908e-120	1.51898	7.13335e-204	479.198	477.611	505.052	494.97	1115.6	1110.29	1134.46	1136.25	1440.31	1379.71	1411.71	1390.23
ENSDARG00000074865	NA	-4.04546	7.27263e-120	-6.4927	4.23275e-173	1359.89	1185.63	1032.65	939.022	51.9593	89.692	69.3771	62.6642	7.32815	14.372	13.7129	14.5956
ENSDARG00000039070	im:7138239	4.29165	7.27463e-120	-1.69247	6.1453e-11	33.9971	38.1478	28.1837	52.1021	759.523	629.732	792.462	823.85	15.3225	7.98442	9.38254	13.8658
ENSDARG00000058996	jam2a	5.74917	7.32129e-120	2.86654	1.50006e-29	11.3324	10.6814	13.5282	27.2352	862.678	696.765	923.399	1045.94	127.243	115.774	129.19	105.088
ENSDARG00000032296	pomp	1.62125	7.44972e-120	1.40873	2.61119e-91	318.926	303.657	313.403	324.454	922.278	1064.03	949.782	949.178	810.76	839.163	848.037	853.113
ENSDARG00000055381	bambia	6.9456	7.9435e-120	2.82623	8.86815e-20	3.23782	7.62956	11.2735	10.6572	1104.9	957.344	1119.81	1157.44	66.6195	56.6894	76.5038	48.8953
ENSDARG00000007836	ctsla	0.51558	9.86329e-120	1.47414	0	12098.1	11348.2	11635.4	11438.8	16620.1	16456.1	16588	16814.3	32123.9	32646.7	31929.5	32497.9
ENSDARG00000104636	NA	-1.61386	1.30055e-119	1.36084	5.52726e-109	1227.14	1361.11	1205.14	1120.2	375.941	450.348	388.903	388.886	3154.43	3236.89	3150.37	3056.32
ENSDARG00000075252	phrf1	-1.53766	1.36166e-119	-1.76633	4.83367e-159	1537.97	1449.62	1352.82	1319.13	472.983	471.119	526.68	475.51	427.697	411.198	428.71	391.162
ENSDARG00000015474	ppp2r5ea	-2.96698	1.58533e-119	-2.20971	4.0442e-83	610.33	666.824	560.292	529.31	81.7596	86.8596	73.2857	58.978	112.587	131.743	137.851	128.441
ENSDARG00000031776	zgc:92066	-0.56696	2.25435e-119	-0.727548	3.70508e-196	39940.2	40397	39166.4	38563.8	26318.9	26065.4	26537.2	27765.8	23847.8	23863.8	23816.5	23918.6
ENSDARG00000067981	zgc:103697	1.93274	2.70232e-119	2.63979	1.16851e-232	148.94	190.739	189.395	195.383	664.01	667.497	753.377	708.658	1101.22	1177.7	1143.23	1134.81
ENSDARG00000000567	znf281a	-2.37511	3.05241e-119	-2.27359	1.7756e-115	1117.05	1194.79	977.411	948.495	233.817	185.049	212.04	181.542	230.504	217.176	216.52	209.447
ENSDARG00000063451	NA	-4.00676	4.8447e-119	-0.759019	1.52662e-13	361.017	384.53	311.148	361.162	23.6873	25.4914	21.4971	16.5876	199.859	213.983	225.903	195.581
ENSDARG00000055966	cflara	4.51808	4.92017e-119	2.33752	6.32323e-31	12.9513	12.2073	27.0564	33.1559	491.321	490.001	556.971	539.096	115.918	121.363	104.651	116.035
ENSDARG00000012953	mob1bb	-3.6061	6.1525e-119	-3.40805	9.61437e-116	911.447	910.97	764.342	785.084	57.3081	97.245	61.56	60.8211	92.6011	80.6427	79.3907	63.4909
ENSDARG00000103361	tshz3b	4.41332	1.35768e-118	4.03423	4.08045e-99	14.5702	25.9405	23.6743	34.34	547.101	462.622	619.508	534.489	440.355	399.221	406.336	416.705
ENSDARG00000104901	ostc	1.34927	1.47274e-118	0.861456	1.85349e-48	581.189	550.855	549.019	538.783	1366.23	1348.21	1515.55	1419.16	1027.94	998.053	962.793	1036.29
ENSDARG00000101377	NA	-3.61507	1.49732e-118	-4.72827	7.7945e-151	600.616	555.432	462.213	476.024	42.0259	38.7092	53.7428	35.9397	19.9859	19.1626	19.4868	19.7041
ENSDARG00000038028	ndufa6	1.74634	1.71457e-118	0.842619	1.27463e-27	317.307	341.804	346.096	378.924	1162.97	1276.46	1099.29	1125.19	601.574	592.444	651.004	647.315
ENSDARG00000103902	nde1	-4.27421	1.72671e-118	-0.179782	0.148757	456.533	445.567	386.681	368.267	22.1591	35.8768	15.6343	11.0584	359.079	369.679	387.571	341.537
ENSDARG00000075177	ribc2	-0.931706	1.72671e-118	-0.507609	1.27199e-39	2363.61	2264.45	2481.29	2394.33	1264.6	1206.59	1266.38	1250.52	1625.52	1716.65	1659.27	1696.01
ENSDARG00000055510	ypel3	1.37272	2.27744e-118	0.682448	1.75235e-29	641.089	601.21	564.802	577.86	1568.71	1406.75	1570.27	1606.23	950.661	977.293	951.245	934.849
ENSDARG00000059993	trpm4a	-3.70461	2.43644e-118	-1.45726	7.11645e-23	1285.42	1261.93	1226.56	1185.32	98.5699	143.507	69.3771	67.2718	480.993	432.756	448.197	441.517
ENSDARG00000023058	foxo3a	-2.65504	4.03159e-118	0.0950181	0.320099	433.868	418.1	402.464	485.497	71.062	83.0831	68.4	53.4489	477.662	472.678	466.24	442.977
ENSDARG00000007438	ube2ib	1.53405	4.04482e-118	2.02906	3.72896e-210	717.178	743.12	660.626	741.271	2158.61	1824.05	2109.65	2184.95	2881.96	3042.07	2853.01	2893.58
ENSDARG00000010051	ufd1l	3.21605	5.07869e-118	0.624653	4.78262e-05	42.0917	51.881	75.5324	72.2325	592.184	518.325	584.331	615.583	91.9349	102.999	89.495	99.2502
ENSDARG00000009001	pdia6	-2.02073	5.28991e-118	-0.0010472	1	943.826	827.045	925.553	841.923	198.668	263.411	189.566	221.168	885.373	863.915	871.133	914.415
ENSDARG00000090821	tp53rk	3.43141	5.39667e-118	2.21892	7.65728e-49	55.043	65.6142	80.0418	61.5752	728.195	568.364	803.211	765.793	291.794	314.586	311.067	318.914
ENSDARG00000005163	efr3a	-1.89915	5.52957e-118	-0.997781	2.75864e-41	815.932	770.586	766.597	676.143	204.781	192.602	186.634	224.854	375.734	372.074	372.415	392.622
ENSDARG00000090191	NA	3.57641	5.8425e-118	3.16906	1.54094e-92	45.3295	27.4664	38.3299	36.7083	444.711	469.231	452.417	402.709	339.093	309.796	335.606	348.105
ENSDARG00000038066	kpna2	2.27957	7.63692e-118	-0.396343	0.000222117	309.212	283.82	400.209	365.899	1652.77	1478.5	1706.09	1812.65	273.806	253.905	262.711	248.855
ENSDARG00000076451	prdm2b	3.22884	9.01881e-118	2.53219	4.49984e-72	53.4241	64.0883	72.1503	82.8897	571.553	604.241	733.834	692.07	389.058	442.337	396.232	376.567
ENSDARG00000035771	MEPCE (1 of many)	-2.48208	1.05604e-117	-0.156767	0.10205	573.095	576.795	665.136	624.041	118.437	127.457	110.417	80.1733	532.29	521.383	568.726	570.688
ENSDARG00000099252	ipcef1	3.40278	1.37143e-117	3.11064	1.89836e-98	29.1404	42.7256	47.3486	47.3655	476.039	395.589	472.937	457.08	367.74	370.477	372.415	361.971
ENSDARG00000022832	bnip4	-2.8929	1.50779e-117	-2.03708	5.74885e-77	561.762	491.344	499.416	500.891	64.1851	92.5243	63.5143	56.2134	125.245	135.735	122.695	116.035
ENSDARG00000101291	txndc11	-3.41591	1.66343e-117	-4.26641	1.74938e-165	1162.38	1133.75	980.793	806.398	99.334	115.183	90.8742	75.5656	49.9646	47.9065	59.9039	53.274
ENSDARG00000069100	aldh9a1a.1	-1.06229	3.83878e-117	-1.05516	1.32124e-122	1447.31	1536.59	1556.87	1554.77	741.185	693.932	755.331	732.618	729.484	747.342	731.838	730.51
ENSDARG00000052377	psmd12	1.1936	4.72553e-117	0.644669	2.07617e-34	726.891	740.068	695.574	695.089	1652.77	1517.21	1657.23	1692.85	1100.55	1121.81	1146.11	1089.56
ENSDARG00000091187	NA	-2.5029	6.72097e-117	-1.21298	2.89757e-40	543.954	488.292	473.486	480.76	97.8058	83.0831	70.3542	95.8393	223.175	221.169	194.868	215.285
ENSDARG00000069269	wdr35	-6.06128	6.77456e-117	-2.24402	1.18444e-77	577.951	506.603	540	505.627	1.52822	19.8266	3.90857	7.37226	123.246	101.402	118.364	105.088
ENSDARG00000059150	tmem107	3.85756	7.01402e-117	2.30548	1.25709e-41	61.5186	45.7774	78.9144	78.1531	1020.85	731.697	1108.08	1043.17	336.429	312.191	363.754	317.455
ENSDARG00000013150	dhx16	2.44661	9.2996e-117	3.03644	8.09441e-186	89.0401	90.0289	99.2067	100.652	492.85	476.784	574.56	540.939	776.117	776.884	788.133	793.271
ENSDARG00000053950	lin37	2.44261	1.29664e-116	2.38951	3.78531e-113	84.1834	68.6661	95.8246	91.1787	479.096	455.069	468.051	469.981	461.007	430.36	452.527	460.492
ENSDARG00000016112	bbs12	-3.02553	1.41852e-116	-2.89413	3.99618e-114	1021.53	964.377	758.706	756.665	116.909	103.854	95.7599	110.584	119.915	119.766	101.043	128.441
ENSDARG00000101341	NA	3.89433	1.54783e-116	1.71439	7.08223e-22	33.9971	38.1478	33.8205	30.7876	522.65	438.074	521.794	545.547	115.252	102.201	106.817	122.603
ENSDARG00000002267	dcaf13	2.08876	1.56379e-116	2.6811	1.61614e-199	119.799	132.754	176.994	139.728	592.948	601.408	607.783	659.817	902.028	923.798	931.036	953.823
ENSDARG00000030367	metrn	1.32726	1.62813e-116	2.30064	0	401.49	434.885	489.269	503.259	1189.72	1137.67	1131.53	1170.35	2323.69	2273.96	2284.29	2212.69
ENSDARG00000002406	zmynd10	-2.01334	1.75078e-116	0.349182	9.10656e-06	1002.11	993.369	786.889	886.92	228.468	229.423	204.223	242.363	1155.18	1166.52	1121.57	1215.08
ENSDARG00000088383	cox5aa	0.98107	1.90698e-116	0.93953	3.67574e-109	1018.3	993.369	1028.14	972.178	1952.3	1974.17	2023.66	1971.16	1972.6	1930.63	1830.32	1959.46
ENSDARG00000074081	NA	-2.80562	2.37192e-116	-0.918707	1.3933e-16	947.063	909.444	955.992	794.557	124.55	167.11	130.937	93.0747	469.668	474.275	463.353	499.17
ENSDARG00000041226	cdc40	2.4558	2.59486e-116	1.77406	3.06845e-60	121.418	106.814	156.701	108.941	676.236	618.402	724.062	718.795	435.692	431.957	406.336	432.03
ENSDARG00000011743	pigo	-1.99904	2.64916e-116	-3.16486	3.35806e-227	746.318	805.682	712.484	686.8	176.509	203.931	182.726	174.17	85.273	78.2473	77.2255	86.8439
ENSDARG00000029353	serpine2	-3.56249	2.82298e-116	-0.13746	0.29086	459.771	468.455	506.18	502.075	29.0361	67.9771	35.1771	33.1751	438.356	452.717	416.44	455.383
ENSDARG00000011740	u2af2b	1.3719	3.1626e-116	0.343482	2.5325e-08	1112.19	1068.14	1182.59	1216.11	2947.93	2684.15	3076.04	3170.07	1468.96	1414.04	1455.02	1483.64
ENSDARG00000055162	zhx2	-2.26963	3.31871e-116	-1.49332	2.68806e-59	932.493	918.599	817.328	763.769	159.699	186.937	164.16	199.972	286.464	334.547	296.633	299.21
ENSDARG00000035521	sfrp1a	-1.62168	4.07651e-116	0.171438	0.012103	1625.39	1507.6	1497.12	1493.2	471.455	590.079	466.097	461.687	1698.13	1721.44	1779.07	1691.63
ENSDARG00000009779	mcl1a	2.06731	5.18965e-116	0.0397577	0.729665	869.356	1048.3	786.889	753.112	3632.57	3310.11	3708.26	3807.77	872.05	831.178	884.845	956.013
ENSDARG00000036282	rnaset2	-2.76486	5.55152e-116	-2.69421	1.01758e-119	709.083	657.668	555.783	551.809	95.5135	96.3008	85.9885	83.8594	97.9307	98.2084	85.1646	99.2502
ENSDARG00000017105	vaspb	-1.92307	6.1924e-116	-0.508661	3.55747e-11	1003.73	996.421	961.629	870.342	228.468	303.064	245.263	234.069	664.197	661.909	695.03	667.749
ENSDARG00000058041	NA	1.55973	7.82035e-116	0.912129	2.07652e-39	314.069	302.131	358.497	356.426	967.361	955.455	1029.91	1003.55	595.579	653.924	636.569	640.018
ENSDARG00000100236	cspp1a	-1.70934	8.56696e-116	-4.3683	0	926.018	1004.05	903.006	899.945	291.889	258.69	300.96	287.518	41.3041	47.1081	49.0779	43.0571
ENSDARG00000098666	si:dkey-93h22.8	-5.00499	9.07863e-116	-2.78619	5.44191e-67	666.992	532.544	540	516.284	18.3386	29.2679	9.77142	11.9799	73.2815	94.2162	68.5647	90.4928
ENSDARG00000012040	NA	1.73087	9.61429e-116	-1.73318	2.03357e-108	2957.75	2865.66	2648.14	2748.39	9354.21	7769.21	10036.2	10074.2	850.731	843.954	857.42	819.544
ENSDARG00000019000	smc3	-1.65027	9.66803e-116	-1.16873	3.67187e-62	2250.29	2229.36	1851.11	2036.72	686.169	723.2	644.914	605.446	934.672	934.178	908.663	937.768
ENSDARG00000025535	clint1a	2.36645	1.2569e-115	1.38985	2.78245e-39	100.373	114.443	167.975	138.544	699.159	714.703	680.091	650.602	356.414	356.904	349.319	332.05
ENSDARG00000045887	mmp30	2.33418	1.71756e-115	3.31328	4.15587e-239	118.181	137.332	169.102	202.488	761.052	762.854	871.611	826.614	1606.2	1588.9	1538.74	1615
ENSDARG00000093945	NA	1.49603	2.32416e-115	1.49821	1.416e-117	461.39	474.559	444.175	393.134	1273.77	1225.48	1277.13	1203.52	1273.1	1258.35	1301.29	1155.24
ENSDARG00000003931	cndp2	1.98245	2.74506e-115	1.50923	4.93356e-67	531.003	410.471	410.355	393.134	1743.69	1520.99	1775.47	1822.79	1259.11	1247.17	1263.03	1174.22
ENSDARG00000100666	ep300a	-1.92046	3.00387e-115	-2.93712	3.19396e-220	781.934	798.052	726.013	676.143	205.545	200.155	182.726	195.365	92.6011	99.8053	96.7123	99.2502
ENSDARG00000013763	RRBP1 (1 of many)	3.62266	4.75528e-115	1.59582	1.82034e-21	22.6648	25.9405	45.094	46.1814	447.767	429.577	461.211	461.687	115.918	118.169	103.93	103.629
ENSDARG00000003941	rrs1	1.72347	7.59833e-115	2.38826	1.77176e-234	189.413	180.058	184.885	188.278	618.163	602.352	614.623	618.348	945.331	984.479	993.106	969.149
ENSDARG00000060767	smg7	-1.20474	7.90862e-115	-0.906219	1.69203e-73	1251.42	1237.52	1147.64	1155.72	512.716	527.766	521.794	511.45	631.553	656.32	645.952	616.665
ENSDARG00000099113	NA	-4.42948	1.10788e-114	-4.15733	3.88912e-127	463.009	454.722	370.898	403.791	16.0463	25.4914	21.4971	15.666	29.3126	23.9533	20.2085	20.4339
ENSDARG00000015551	fth1a	1.01342	1.3349e-114	-0.606391	6.36167e-41	7605.65	7560.9	7279.29	7367.71	15148.4	13669.1	15533.6	15820.9	4837.24	4908.02	4803.14	5028.92
ENSDARG00000015610	tubg1	-5.18937	1.43072e-114	-1.38813	1.64205e-27	500.244	447.092	425.01	419.185	5.34876	26.4355	11.7257	6.45072	167.215	167.673	159.503	188.283
ENSDARG00000028086	zbtb2b	2.1184	1.43085e-114	-0.228768	0.0299747	234.742	267.035	249.144	249.853	1091.15	946.014	1160.85	1150.99	223.175	219.572	222.294	189.013
ENSDARG00000052334	ociad1	1.75137	1.4347e-114	1.00854	3.70847e-38	438.725	460.826	445.303	428.658	1480.08	1299.12	1581.02	1608.99	850.731	882.279	932.48	901.279
ENSDARG00000073858	pex26	-4.01791	1.60638e-114	-2.23795	3.9304e-56	513.195	515.759	563.674	477.208	26.7438	54.7593	22.4743	23.9598	107.924	104.596	116.199	109.467
ENSDARG00000063051	bap1	2.39004	2.22694e-114	1.93074	1.43865e-74	119.799	138.858	148.81	145.649	755.703	620.291	753.377	792.517	534.955	542.941	508.1	540.038
ENSDARG00000068926	si:ch211-137a8.2	-6.62385	2.4463e-114	-10.1272	4.71952e-58	1366.36	1277.19	1063.09	952.047	9.9334	25.4914	5.86285	5.52919	0.666195	1.59688	0.721734	0.729781
ENSDARG00000079391	NA	3.83408	2.73374e-114	2.92035	1.48638e-65	19.4269	24.4146	42.8393	31.9717	445.475	417.304	454.371	448.786	220.511	261.091	230.233	226.962
ENSDARG00000016526	gata3	1.27433	2.75167e-114	-0.0332526	0.63842	485.674	573.743	520.835	569.571	1334.9	1296.28	1323.05	1254.2	517.634	529.367	527.587	530.55
ENSDARG00000019231	spna2	-1.43367	2.80681e-114	-1.09223	1.59765e-72	1377.69	1347.38	1492.61	1553.59	565.44	543.816	534.497	494.863	662.864	690.653	703.69	656.073
ENSDARG00000011404	fen1	2.59131	3.24555e-114	0.915707	2.34322e-14	97.1347	80.8734	125.136	143.281	728.195	640.117	693.771	681.934	215.181	218.773	217.964	207.258
ENSDARG00000045146	tomm22	1.67184	5.55413e-114	0.268414	0.000538209	707.464	648.513	661.754	612.2	2099	1842.93	2205.41	2219.97	774.785	852.736	775.142	761.161
ENSDARG00000092112	tomm40	-1.42996	6.76318e-114	-0.530338	1.02978e-19	1074.96	1179.53	1194.99	1124.93	425.608	406.918	395.743	469.981	818.088	800.039	793.907	758.242
ENSDARG00000076667	ccng1	1.8552	7.85411e-114	0.868888	6.19037e-26	6297.57	6120.44	5438.33	5437.56	21132.9	17377.6	22947.2	22823.6	10483.2	10718.3	10649.9	10681.8
ENSDARG00000098803	cyp2aa8	-1.01447	1.09441e-113	-0.312782	8.12549e-13	3603.7	3521.81	3441.8	3390.19	1677.98	1639	1713.91	1874.4	2824.67	2852.04	2699.28	2853.44
ENSDARG00000078640	NA	-4.81473	1.15477e-113	-3.38115	1.55198e-125	370.731	390.634	373.152	337.48	11.4616	16.0501	16.6114	8.29379	37.9731	37.5268	32.478	32.8401
ENSDARG00000025404	ube2g2	2.77324	1.41588e-113	-0.634714	4.73112e-06	171.605	140.384	145.428	140.912	1059.82	849.713	1154.01	1015.53	101.262	95.8131	104.651	81.7354
ENSDARG00000039910	rbm42	-2.45454	1.42645e-113	-0.404192	1.54208e-06	440.344	386.056	436.284	419.185	84.816	86.8596	59.6057	73.7226	310.447	307.4	322.615	331.32
ENSDARG00000058280	NA	-3.76689	1.44473e-113	-0.227058	0.0441953	348.066	390.634	349.478	371.82	17.5745	47.2063	22.4743	21.1952	317.109	319.377	313.232	297.021
ENSDARG00000026068	trappc5	-1.5998	1.968e-113	-1.98022	5.30407e-171	1481.3	1382.48	1219.79	1301.37	458.465	413.527	453.394	445.1	331.765	335.346	333.441	360.512
ENSDARG00000019950	carf	-4.15638	2.8565e-113	-7.0336	5.71289e-90	506.719	506.603	414.864	432.211	25.9797	28.3238	33.2228	16.5876	5.32956	1.59688	3.60867	2.91912
ENSDARG00000101180	mcm7	2.73153	3.67106e-113	2.37114	1.90945e-85	123.037	177.006	191.649	187.094	1078.92	980.003	1227.29	1270.79	911.355	830.38	848.759	957.472
ENSDARG00000097530	NA	-7.20016	3.94197e-113	-1.29363	8.3609e-21	937.35	918.599	731.649	679.696	1.52822	14.1619	2.93143	3.68613	335.762	328.16	367.362	297.75
ENSDARG00000055389	NA	-1.09148	4.89943e-113	-1.02974	7.03461e-104	3118.02	3215.1	3081.04	2998.24	1389.15	1563.47	1368	1503.02	1538.91	1461.95	1568.33	1504.81
ENSDARG00000029305	baiap2l1a	2.99053	5.01788e-113	-0.641462	0.000108169	53.4241	65.6142	63.1315	63.9435	492.086	461.678	524.725	490.255	33.3098	45.5112	43.304	37.2188
ENSDARG00000078145	si:ch211-218g4.2	-3.52297	6.40862e-113	-1.1774	5.57506e-20	649.184	662.246	475.741	471.287	45.8465	48.1504	51.7885	49.7627	255.819	227.556	254.772	255.423
ENSDARG00000014499	nutf2l	1.5821	7.21896e-113	-0.325539	2.07624e-05	471.103	430.307	496.033	451.157	1489.25	1287.79	1396.34	1369.4	351.751	356.904	372.415	397.001
ENSDARG00000021806	zfp36l2	-3.00114	7.22604e-113	-0.210926	0.0645648	552.049	587.476	524.217	499.706	61.1286	93.4685	43.9714	70.958	481.659	460.701	445.31	478.006
ENSDARG00000100660	NA	4.20792	8.05583e-113	-0.4422	0.0629511	29.1404	41.1996	28.1837	30.7876	612.051	490.001	651.754	622.956	25.3154	22.3564	26.7041	19.7041
ENSDARG00000091720	wu:fe17e08	-3.08483	8.2951e-113	-3.14097	1.56184e-124	565	596.632	481.378	504.443	53.4876	62.3123	67.4228	70.0364	71.9491	51.8988	64.2343	53.274
ENSDARG00000058494	dnaja3a	2.6698	8.79328e-113	1.05524	1.52203e-17	93.8969	99.1843	117.244	107.757	684.641	570.252	707.451	723.403	205.188	226.758	230.955	214.555
ENSDARG00000003920	setb	0.907113	9.052e-113	0.797529	3.99664e-88	2313.42	2441.46	2448.6	2358.8	4550.26	4175.87	4680.51	4533.94	4073.12	4193.42	4181.72	4182.37
ENSDARG00000069278	trmt5	-3.26692	1.03328e-112	-2.02608	4.41834e-63	532.622	495.922	406.973	420.369	45.0824	56.6475	51.7885	38.7043	111.255	115.774	107.538	118.954
ENSDARG00000087897	h2afy2	-1.69902	1.17325e-112	-0.884873	2.33046e-37	927.636	952.17	901.879	807.583	259.797	308.729	269.691	266.323	479.661	477.469	477.066	505.008
ENSDARG00000014626	dlx3b	4.49895	1.97121e-112	-1.17624	3.49629e-05	21.0459	12.2073	25.929	27.2352	518.065	544.761	473.914	480.118	10.6591	7.98442	10.826	9.48715
ENSDARG00000068157	ehmt1a	-3.09554	2.0402e-112	-2.96294	2.5438e-112	720.416	704.972	607.641	624.041	86.3442	96.3008	58.6285	67.2718	73.9477	83.8364	84.4428	97.7906
ENSDARG00000076317	plod3	1.83278	2.48852e-112	-0.186701	0.0436008	276.834	286.872	296.493	307.876	997.925	1003.61	1075.83	1099.39	269.143	220.37	256.937	280.966
ENSDARG00000035890	fuca1.1	1.03155	2.84121e-112	0.122925	0.0128313	841.834	872.822	855.658	878.631	1778.08	1809.89	1708.04	1757.36	951.993	947.751	889.176	969.149
ENSDARG00000016447	ythdf1	-1.12335	3.44061e-112	-2.11926	0	1329.13	1339.75	1272.78	1316.76	606.702	623.123	603.874	576.879	295.124	312.989	305.293	296.291
ENSDARG00000005867	gon4l	-2.17996	4.43781e-112	-3.02835	4.21907e-197	1278.94	1173.43	1121.71	1012.44	268.966	228.478	227.674	282.91	127.243	144.518	145.068	144.497
ENSDARG00000040988	tpi1b	-1.96289	4.48478e-112	-1.37002	1.99538e-60	1338.84	1402.31	1246.85	1129.67	342.32	366.321	292.166	307.792	479.661	493.437	475.622	527.631
ENSDARG00000032876	trit1	-3.23673	5.04663e-112	-3.62493	2.84456e-137	709.083	711.075	554.656	557.729	66.4774	77.4183	68.4	55.2919	51.9632	57.4878	51.9648	43.0571
ENSDARG00000011948	insra	-4.69534	7.74399e-112	-0.939682	2.9483e-14	474.341	381.478	381.044	357.61	12.2257	27.3796	10.7486	11.0584	198.526	219.572	212.19	198.5
ENSDARG00000045351	ccdc58	1.80646	9.29775e-112	0.675332	5.83264e-16	304.355	268.561	272.818	309.06	1076.63	918.634	1069.97	972.216	470.334	443.135	452.527	477.276
ENSDARG00000033604	lrpap1	-3.94441	1.14568e-111	-0.792459	4.34511e-12	375.588	379.952	381.044	318.533	22.1591	35.8768	25.4057	11.0584	207.187	205.998	200.642	224.772
ENSDARG00000013863	fam133b	-1.41343	1.16775e-111	-0.580097	4.53876e-22	1628.63	1702.92	1580.54	1718.19	544.809	655.223	652.731	641.386	1145.86	1061.93	1090.54	1134.08
ENSDARG00000033971	prrx1a	-3.72982	1.22234e-111	-3.10122	1.30186e-107	422.536	378.426	377.662	338.664	23.6873	29.2679	28.3371	33.1751	51.297	39.9221	46.191	37.9486
ENSDARG00000036670	aplnrb	-3.12158	2.25528e-111	-10.4546	5.17285e-27	531.003	491.344	429.52	441.684	59.6004	53.8152	54.72	47.9197	0	0.798442	0	0
ENSDARG00000016830	rimkla	2.40393	2.47667e-111	1.50971	2.60311e-44	441.963	425.73	487.015	429.842	2348.1	1837.27	2668.58	2610.7	1263.77	1296.67	1221.17	1309.23
ENSDARG00000020364	fbp1b	1.71838	2.48786e-111	2.46502	9.85817e-232	611.949	598.158	807.182	772.058	2271.69	2361.26	2336.35	2270.65	3812.64	3969.06	3895.92	3826.97
ENSDARG00000014361	tmbim4	-3.34299	3.37484e-111	-2.23863	2.81957e-60	874.212	878.926	774.489	725.877	89.4006	103.854	64.4914	60.8211	173.211	197.215	172.494	145.226
ENSDARG00000042492	si:dkey-250d21.1	-2.45634	3.49628e-111	-1.87525	2.47294e-75	760.889	791.949	676.409	689.169	117.673	159.557	137.777	117.035	214.515	176.456	209.303	191.932
ENSDARG00000056007	cyb5d1	-1.64266	3.85783e-111	-0.620719	3.47689e-21	811.075	788.897	741.796	785.084	242.986	226.59	292.166	239.598	503.644	500.623	510.266	515.225
ENSDARG00000018921	fam84a	-4.07395	3.95116e-111	1.60905	5.44418e-94	293.023	305.183	270.564	286.562	14.5181	31.1562	3.90857	18.4306	850.731	907.829	879.072	876.466
ENSDARG00000063333	nup210	-4.37014	4.02945e-111	-0.971043	2.54703e-24	296.261	302.131	310.021	317.349	12.2257	17.9384	11.7257	17.5091	149.228	160.487	160.225	156.903
ENSDARG00000053625	anxa2b	5.34985	4.12695e-111	5.67304	2.36949e-125	21.0459	9.15548	10.1461	13.0255	516.537	585.358	528.634	519.744	675.522	716.203	652.447	645.126
ENSDARG00000077860	ankhd1	-1.47916	4.71152e-111	-1.56535	1.36634e-127	1703.1	1527.44	1518.54	1423.33	562.383	507.94	552.085	586.094	520.965	543.739	515.318	502.089
ENSDARG00000054616	cldni	3.79598	6.28793e-111	-0.391868	0.0618314	42.0917	45.7774	46.2213	47.3655	657.897	503.219	674.228	701.286	31.9774	35.1315	33.1997	38.6784
ENSDARG00000006225	ddx39aa	1.51049	7.32044e-111	2.07216	2.33649e-210	1021.53	1034.57	1285.18	1224.4	3385	3059.91	3267.56	3347	4669.36	4894.45	4816.85	4899.75
ENSDARG00000102012	ppp1cbl	5.4073	1.04756e-110	5.6049	3.40366e-119	17.808	16.785	13.5282	11.8414	612.051	507.94	652.731	753.813	706.833	702.629	739.777	748.025
ENSDARG00000045847	NA	0.853818	1.24872e-110	0.184092	3.44181e-06	1359.89	1379.43	1426.1	1375.97	2484.12	2472.67	2491.71	2579.37	1570.22	1596.88	1623.9	1512.84
ENSDARG00000012723	rbm14a	1.56648	1.84205e-110	0.136798	0.0771891	566.619	589.002	540	522.205	1628.31	1452.07	1716.84	1756.44	616.231	615.599	596.874	603.529
ENSDARG00000025593	plekhj1	-2.70645	1.89894e-110	-3.25303	9.28658e-154	1308.08	1257.35	1091.27	930.733	181.858	189.769	174.908	153.896	123.912	119.766	131.356	104.359
ENSDARG00000031214	arcn1b	-1.89694	2.54121e-110	-0.822631	7.09336e-26	895.258	946.066	897.37	875.078	242.986	289.847	216.926	219.325	499.646	554.917	497.274	491.142
ENSDARG00000053395	cdkn2aipnl	1.43561	2.85228e-110	0.000382195	1	992.393	909.444	987.558	944.943	2665.21	2289.51	2736.98	2683.5	963.318	987.673	977.949	907.847
ENSDARG00000075795	nol7	1.73985	2.92899e-110	0.972406	2.16982e-34	278.453	285.346	321.294	337.48	1005.57	934.685	1099.29	1074.51	612.233	582.064	606.978	613.745
ENSDARG00000032985	mrpl27	2.17701	2.99779e-110	1.08511	1.02245e-26	139.226	94.6066	124.008	130.255	536.404	550.425	565.765	563.978	273.806	243.525	261.989	258.342
ENSDARG00000104034	arid3b	-0.924876	3.02193e-110	-0.970679	1.64763e-122	8463.67	8213.99	7851.98	7688.61	4139.94	4046.52	4520.26	4256.56	4171.71	4052.09	4104.5	4099.91
ENSDARG00000054122	TMEM30B	-3.43562	3.24037e-110	-2.18893	4.69541e-53	1055.53	1022.36	935.7	867.974	74.8826	133.122	68.4	82.0163	193.863	221.169	215.077	219.664
ENSDARG00000003487	nup93	2.36331	4.19094e-110	1.80391	2.72905e-64	273.596	299.079	242.38	256.958	1371.57	1109.35	1514.57	1503.94	915.352	978.092	929.593	908.577
ENSDARG00000094282	NA	-3.62763	5.29202e-110	-5.5678	8.15198e-133	485.674	544.751	470.104	451.157	38.2054	55.7034	30.2914	33.1751	7.99434	12.7751	10.1043	10.2169
ENSDARG00000070526	NA	-1.64628	5.79971e-110	0.0290841	0.694386	595.76	622.572	606.514	579.044	187.206	191.658	199.337	189.836	582.921	644.343	616.361	609.367
ENSDARG00000086075	ttc3	-3.80611	6.80438e-110	0.7814	2.8285e-12	403.109	392.16	319.04	384.845	25.9797	43.4298	18.5657	18.4306	614.898	656.32	607.7	691.102
ENSDARG00000098783	polr2b	1.93642	9.477e-110	1.06175	2.78015e-33	435.487	428.781	402.464	368.267	1496.89	1376.54	1730.52	1638.48	819.42	831.977	827.107	924.632
ENSDARG00000010124	sp5l	-0.908042	1.04705e-109	-0.970357	4.8533e-126	10276.9	9597.99	10019.9	9834.27	5156.2	4953.83	5575.57	5487.72	4920.52	5161.93	5104.82	5089.49
ENSDARG00000014474	yipf1	-4.78603	1.18374e-109	-1.70988	2.5223e-31	548.811	512.707	427.265	388.397	11.4616	28.3238	11.7257	16.5876	131.907	142.921	149.399	147.416
ENSDARG00000104573	slc12a2	-5.0951	1.19417e-109	-1.99745	8.65545e-55	378.825	451.67	365.261	407.344	12.9898	19.8266	3.90857	9.21532	103.926	87.0302	100.321	108.737
ENSDARG00000060501	dpcd	-1.17552	1.47368e-109	-0.339214	4.1952e-11	2964.23	2769.53	2657.16	2547.08	1211.11	1133.9	1259.54	1230.25	2089.19	2134.24	2182.52	2227.29
ENSDARG00000022160	NA	-3.48709	1.5085e-109	-0.44863	1.8646e-05	361.017	340.279	301.002	350.505	25.2156	33.9885	28.3371	33.1751	246.492	276.261	243.946	222.583
ENSDARG00000018124	psmd3	2.62899	1.70468e-109	3.95948	5.52262e-257	85.8023	73.2438	109.353	89.9945	543.281	488.113	623.417	596.231	1379.69	1406.86	1382.84	1490.21
ENSDARG00000069708	cdc34a	-2.87506	2.07322e-109	-0.101831	0.316048	412.822	340.279	325.804	345.768	50.4311	55.7034	45.9257	40.5474	321.772	342.532	331.997	325.482
ENSDARG00000079161	bsnb	-4.94667	2.23705e-109	-10.4034	2.88e-34	812.694	785.845	567.056	562.466	17.5745	25.4914	17.5886	27.646	1.33239	0	0	0
ENSDARG00000044760	gnaia	-1.21086	2.62075e-109	-1.17263	5.16652e-106	2525.5	2401.79	2166.76	2246.31	980.351	1053.64	986.914	1007.23	1030.6	1025.2	1078.27	1000.53
ENSDARG00000059337	tgif1	1.34603	4.5844e-109	0.622762	6.46334e-24	908.209	808.734	864.677	787.452	2149.44	1937.35	2241.56	2226.42	1272.43	1338.19	1286.13	1285.87
ENSDARG00000002758	dedd1	2.05733	5.56909e-109	0.0492964	0.683814	241.218	207.524	232.234	188.278	906.996	839.328	982.028	881.906	229.171	238.734	228.79	200.69
ENSDARG00000076296	triqk	-3.39306	6.00983e-109	-0.0572863	0.687904	492.149	537.121	427.265	389.582	38.9695	60.4241	35.1771	40.5474	450.348	418.384	432.318	466.33
ENSDARG00000097920	NA	-5.7743	8.78661e-109	-0.764308	5.92353e-09	432.249	450.144	503.925	556.545	3.05643	22.659	6.84	3.68613	303.785	288.238	267.041	286.804
ENSDARG00000019033	tmem59	-1.83608	9.33503e-109	-2.02317	2.01995e-135	650.803	718.705	654.99	673.775	187.971	168.054	188.588	210.109	167.881	154.898	177.546	162.011
ENSDARG00000074575	si:ch211-269i23.2	-4.28696	1.06402e-108	-1.18584	1.44877e-20	461.39	389.108	342.714	356.426	19.8668	29.2679	13.68	15.666	161.885	162.084	186.929	167.12
ENSDARG00000070437	rpl22	1.05156	1.91279e-108	-0.412907	3.22748e-17	3095.36	2897.71	3254.66	3178.23	6518.61	6819.42	6290.84	6153.07	2268.39	2378.56	2257.58	2438.93
ENSDARG00000014313	atp5j	1.08085	2.00207e-108	-0.113459	0.03413	1002.11	984.214	931.19	1031.38	2183.82	2100.68	1971.87	2084.51	926.678	921.402	917.323	881.575
ENSDARG00000031388	dctn2	3.55082	2.22923e-108	2.41055	3.78079e-49	35.6161	42.7256	39.4572	39.0766	472.983	397.477	506.16	469.981	215.181	221.967	189.094	211.636
ENSDARG00000004836	dnajc5ab	-3.07822	2.30167e-108	-2.94719	2.43811e-104	1367.98	1187.16	1004.47	888.104	116.144	149.172	117.257	142.837	150.56	144.518	139.295	140.118
ENSDARG00000089790	efna5a	2.96543	2.32292e-108	3.58727	3.7585e-161	58.2808	91.5548	78.9144	76.969	602.117	497.554	701.588	602.682	904.027	947.751	931.758	915.875
ENSDARG00000013122	maf1	-2.30144	2.75789e-108	-0.751201	1.42409e-18	485.674	476.085	437.411	432.211	81.7596	106.686	100.646	82.9379	273.14	279.455	279.311	252.504
ENSDARG00000055989	tmem161b	-3.692	2.90079e-108	-0.178139	0.136738	362.636	418.1	352.86	311.428	22.9232	40.5974	19.5428	28.5675	315.777	320.175	334.163	302.859
ENSDARG00000040559	rad1	-1.91859	2.90589e-108	0.838846	5.75623e-35	581.189	534.069	520.835	490.233	141.36	154.837	121.166	141.916	931.341	964.518	985.888	907.847
ENSDARG00000067850	jund	-3.2305	3.34929e-108	-4.2618	4.03824e-162	1002.11	991.843	737.286	751.928	80.9954	98.1891	87.9428	103.212	43.3027	37.5268	45.4692	54.0038
ENSDARG00000057096	ndr1	-6.46205	3.40528e-108	-3.47735	9.07332e-177	501.863	524.914	514.071	545.888	3.05643	13.2178	3.90857	3.68613	43.9689	43.1159	46.9127	53.274
ENSDARG00000005355	larp6	-4.08472	4.04889e-108	-1.17009	3.95299e-21	362.636	361.641	382.171	381.293	26.7438	30.212	16.6114	12.9014	161.885	170.867	138.573	190.473
ENSDARG00000036870	arih1l	-5.68263	4.93403e-108	-2.59827	5.51091e-48	705.846	682.083	578.33	548.256	11.4616	27.3796	3.90857	5.52919	102.594	101.402	114.034	95.6013
ENSDARG00000018411	mknk1	3.6232	5.00866e-108	2.69507	3.97921e-59	46.9484	21.3628	42.8393	35.5242	508.896	433.354	419.194	460.766	249.823	248.316	243.224	217.475
ENSDARG00000090847	NA	-5.26333	6.52867e-108	-1.347	2.49781e-19	560.143	566.114	405.846	426.29	7.64108	21.7149	8.79428	12.9014	183.204	212.386	181.877	189.743
ENSDARG00000062053	kif1bp	3.21715	8.29735e-108	0.684092	2.49226e-05	35.6161	48.8292	50.7307	50.918	442.419	405.974	463.165	446.021	81.942	80.6427	73.6168	67.1398
ENSDARG00000056648	ext2	-1.33521	9.11544e-108	-0.181869	0.0010095	1018.3	1020.84	950.355	884.552	385.11	378.594	390.857	375.063	842.071	855.93	865.359	839.977
ENSDARG00000071374	lrrtm2	-7.7324	1.70842e-107	-7.96425	2.94442e-118	1141.33	1062.04	875.95	831.265	1.52822	12.2736	2.93143	1.84306	3.33098	5.5891	2.88693	3.6489
ENSDARG00000103235	mfsd8	3.48045	1.73041e-107	2.54114	4.12458e-57	71.2321	64.0883	59.7495	74.6007	767.164	563.643	837.411	845.966	394.388	365.687	391.18	419.624
ENSDARG00000089361	wu:fb59d01	4.92604	2.45879e-107	4.91661	3.03566e-107	8.09456	7.62956	18.0376	22.4986	485.209	433.354	450.463	466.295	439.023	458.306	453.97	475.087
ENSDARG00000039322	NA	-3.06331	2.66193e-107	-1.93473	1.77543e-52	765.745	798.052	706.848	672.591	74.1185	123.68	73.2857	81.0948	199.192	202.006	198.477	168.579
ENSDARG00000079110	cluap1	-2.16847	3.14677e-107	-0.145425	0.10667	743.08	642.409	549.019	606.279	147.473	142.563	131.914	139.151	564.934	583.661	566.561	571.418
ENSDARG00000017454	nup50	-1.41274	3.33789e-107	0.0696773	0.241008	772.221	726.334	691.065	709.299	269.73	270.964	273.6	270.93	760.795	733.768	762.151	774.297
ENSDARG00000057805	mrpl28	2.93034	4.19496e-107	1.93571	1.00984e-45	37.235	65.6142	66.5136	46.1814	397.336	405.974	428.965	434.042	205.854	214.781	207.859	207.258
ENSDARG00000058943	cdcp1a	-1.25838	4.34767e-107	-1.68933	2.17709e-187	1351.79	1403.84	1275.03	1330.97	554.742	517.381	592.148	574.114	400.383	428.764	402.727	429.111
ENSDARG00000068182	crb3b	4.49279	5.10002e-107	-1.38234	8.57298e-07	22.6648	18.311	39.4572	28.4193	621.984	530.599	684.977	697.6	13.9901	11.9766	8.6608	8.02759
ENSDARG00000069066	nufip2	2.76591	6.18328e-107	2.488	8.39301e-87	71.2321	67.1402	94.6973	87.6263	540.988	489.057	574.56	614.662	467.669	484.654	457.579	420.354
ENSDARG00000093783	NA	-2.67023	1.18686e-106	-0.341351	0.000153004	330.258	381.478	334.823	370.635	61.1286	57.5917	59.6057	43.312	282.467	288.238	284.363	263.451
ENSDARG00000039974	rai14	4.23179	1.33275e-106	-0.17183	0.506718	35.6161	41.1996	32.6931	26.051	681.584	504.163	654.685	682.855	34.6422	27.9455	33.1997	22.6232
ENSDARG00000104068	gstp1	4.17435	1.4232e-106	2.54085	1.25176e-38	12.9513	21.3628	21.4196	37.8924	448.531	396.533	460.234	452.472	133.905	134.937	145.068	152.524
ENSDARG00000005941	yes1	-1.99461	1.71209e-106	0.0523738	0.607283	1594.63	1634.25	1322.38	1301.37	365.244	409.751	327.343	362.162	1445.64	1601.68	1501.93	1508.46
ENSDARG00000034677	scel	2.73705	1.99958e-106	0.13792	0.379692	84.1834	80.8734	74.405	75.7849	484.444	496.61	567.72	545.547	79.2772	81.4411	86.608	97.7906
ENSDARG00000016429	farp2	-1.4893	2.56567e-106	-0.382893	2.60171e-09	1465.12	1344.33	1422.71	1280.05	453.116	462.622	544.268	504.999	1023.28	1053.94	1112.91	1034.1
ENSDARG00000104173	tufm	2.87684	3.32436e-106	2.72744	9.19517e-96	187.794	120.547	133.027	172.884	1076.63	917.69	1264.42	1251.44	1020.61	1003.64	983.723	1057.45
ENSDARG00000009350	atg3	-2.85086	3.50883e-106	0.231617	0.0218592	466.247	411.996	351.733	374.188	55.0158	61.3682	51.7885	52.5273	478.994	481.461	486.448	426.192
ENSDARG00000092489	NA	-7.57839	5.02745e-106	-4.40618	5.46472e-231	862.88	744.645	807.182	756.665	2.29232	11.3295	0.977142	1.84306	43.3027	29.5424	35.3649	40.1379
ENSDARG00000039343	ahcyl2	2.56207	6.13017e-106	3.36467	9.20897e-186	134.37	151.065	138.664	134.992	797.729	662.776	895.062	947.335	1450.31	1457.16	1405.22	1448.61
ENSDARG00000024954	tmed4	3.14517	6.46129e-106	1.30324	4.06375e-18	89.0401	48.8292	67.6409	74.6007	630.389	551.369	687.908	610.054	165.216	167.673	200.642	157.633
ENSDARG00000059653	kdm2aa	-1.34905	6.67728e-106	0.308249	1.4135e-08	990.774	991.843	916.535	908.234	377.469	399.365	361.543	351.104	1224.47	1163.33	1129.51	1182.24
ENSDARG00000061124	srpr	2.37069	7.26309e-106	3.1981	2.69148e-201	90.6591	76.2956	85.6785	88.8104	452.352	416.359	468.051	434.042	786.777	752.931	771.533	831.22
ENSDARG00000069401	NA	-3.0385	8.65987e-106	-5.80508	3.47204e-178	840.215	909.444	676.409	697.458	109.267	86.8596	93.8057	87.5455	9.99293	16.7673	15.8781	13.1361
ENSDARG00000034293	hif1ab	1.1167	9.66801e-106	0.912101	1.33323e-71	607.092	605.787	583.967	542.335	1289.05	1210.37	1285.92	1267.11	1105.22	1080.29	1108.58	1091.02
ENSDARG00000096447	NA	2.48782	1.12415e-105	2.5624	9.7474e-114	79.3267	83.9252	96.952	108.941	550.922	467.342	529.611	551.076	524.296	595.638	549.961	543.687
ENSDARG00000011493	DCUN1D3	-7.1583	1.17977e-105	-6.04489	1.34604e-153	828.883	845.356	660.626	672.591	4.58465	11.3295	4.88571	0	9.32673	15.1704	7.93907	13.1361
ENSDARG00000103553	sf3b3	1.20028	1.18047e-105	0.969813	1.16705e-69	798.123	857.563	874.823	917.707	1970.63	1830.66	2069.59	2077.13	1723.45	1683.91	1705.46	1660.25
ENSDARG00000024694	myo1b	-1.13241	1.19298e-105	-0.355493	1.69745e-13	1387.41	1313.81	1302.09	1280.05	614.343	580.637	638.074	572.271	995.962	1035.58	1066.72	1025.34
ENSDARG00000087536	znf407	-3.47918	1.28166e-105	-4.721	1.74116e-139	548.811	534.069	443.048	422.737	39.7336	52.871	45.9257	35.9397	20.6521	18.3642	15.8781	18.2445
ENSDARG00000020043	cnot8	2.74687	1.35439e-105	0.144191	0.335419	134.37	129.703	161.211	170.516	1014.74	874.26	1035.77	1111.37	176.542	159.688	190.538	136.469
ENSDARG00000010673	NA	2.417	1.42168e-105	2.42841	3.69975e-108	74.4699	88.5029	98.0793	93.547	508.132	435.242	501.274	470.903	498.314	459.903	477.788	495.521
ENSDARG00000078759	dna2	-2.7919	1.42839e-105	0.436123	2.8238e-06	419.298	392.16	330.313	351.689	45.0824	60.4241	50.8114	58.978	526.294	511.003	504.492	467.06
ENSDARG00000057910	mrps34	-4.24258	1.45709e-105	-0.194559	0.103784	349.685	379.952	317.912	286.562	16.0463	24.5473	11.7257	17.5091	267.81	315.385	285.807	292.642
ENSDARG00000074262	NA	-2.71385	1.96562e-105	0.531295	2.35551e-07	607.092	614.943	490.397	446.42	72.5903	90.6361	77.1942	87.5455	780.115	787.264	787.411	750.944
ENSDARG00000076568	sec61b	1.23408	2.76744e-105	1.03581	1.13928e-74	2086.78	2127.12	2074.32	2166.97	4829.16	5620.38	4762.59	4683.23	4222.35	4325.16	4377.31	4414.44
ENSDARG00000104485	NA	-2.96407	2.94994e-105	-4.70279	6.21768e-176	746.318	663.772	687.683	621.673	77.939	118.016	71.3314	81.0948	24.6492	27.147	25.2607	27.0019
ENSDARG00000052244	zgc:158564	-2.60532	2.97828e-105	-0.609351	4.31839e-08	1112.19	1190.21	895.115	809.951	168.104	171.831	155.366	160.347	647.542	660.312	622.856	688.913
ENSDARG00000037846	hm13	-2.15588	3.10321e-105	0.53463	3.95913e-12	477.579	436.411	440.793	485.497	94.7494	126.513	99.6685	93.0747	670.859	706.621	632.96	656.073
ENSDARG00000070399	alg2	2.34067	3.57679e-105	3.17102	2.53936e-201	98.7536	85.4511	89.0606	95.9152	437.07	436.186	509.091	491.177	854.062	838.364	826.385	807.137
ENSDARG00000100514	cfap20	-1.40874	3.83876e-105	0.425179	3.21981e-15	718.797	743.12	716.994	724.693	262.853	306.841	270.668	254.343	999.959	967.712	970.01	958.202
ENSDARG00000029783	dedd	-2.86341	3.90197e-105	-0.76631	3.1996e-12	534.241	523.388	464.468	512.732	80.2313	78.3624	62.5371	56.2134	339.76	307.4	291.58	254.693
ENSDARG00000096711	NA	-4.83837	4.38045e-105	0.930255	1.45631e-28	293.023	292.975	314.53	336.295	7.64108	24.5473	5.86285	5.52919	612.233	595.638	575.222	583.095
ENSDARG00000098626	nitr12	3.17422	4.38045e-105	-4.19651	1.01502e-54	131.132	143.436	127.39	139.728	1266.13	919.579	1349.43	1358.34	5.99576	7.18598	7.21734	8.75737
ENSDARG00000098822	NA	-3.6224	5.05081e-105	-0.87513	1.90378e-13	359.398	317.39	361.879	426.29	29.8002	37.765	26.3828	24.8814	195.861	224.362	181.877	199.23
ENSDARG00000073765	gna13a	-3.47849	5.42604e-105	-0.222377	0.0937873	586.046	494.396	421.628	386.029	42.79	42.4857	49.8343	33.1751	389.058	414.392	399.84	407.947
ENSDARG00000006220	ugt1a1	-6.42737	5.62182e-105	-6.72664	7.90551e-115	605.473	636.306	529.854	498.522	3.82054	10.3854	4.88571	7.37226	5.99576	7.98442	0.721734	6.56803
ENSDARG00000004189	cbx1a	1.67365	6.21299e-105	1.29539	2.75107e-63	1308.08	1249.72	1179.21	1182.95	3924.46	3303.5	4386.39	4068.56	2979.89	3039.67	3097.68	2947.58
ENSDARG00000071211	zgc:112255	2.85753	7.69173e-105	2.675	1.7366e-92	46.9484	44.2515	54.1127	66.3118	385.11	384.259	414.308	380.593	339.093	353.71	328.389	356.863
ENSDARG00000003058	fgfr1op	-1.98487	8.13061e-105	-0.650186	6.20081e-17	495.387	556.958	547.892	506.811	123.021	139.731	128.006	142.837	348.42	349.718	306.737	338.618
ENSDARG00000090673	NA	-3.42285	9.35903e-105	-0.142966	0.249905	432.249	408.945	351.733	328.006	29.0361	48.1504	33.2228	31.3321	367.074	331.354	351.484	320.374
ENSDARG00000060035	rnf32	-2.28361	9.66453e-105	-0.273072	0.00298842	603.854	595.106	560.292	581.412	113.852	95.3567	139.731	131.779	471.666	523.778	434.484	505.738
ENSDARG00000037182	surf2	-2.25875	1.07206e-104	0.86651	6.90237e-31	407.966	386.056	363.006	402.607	73.3544	95.3567	88.92	69.1149	708.166	750.536	687.09	693.292
ENSDARG00000061114	NA	-2.38414	1.9543e-104	-0.602399	4.56401e-12	437.106	424.204	373.152	384.845	74.8826	79.3066	78.1714	76.4871	260.482	261.889	288.693	250.315
ENSDARG00000074431	NA	-3.1264	1.96756e-104	-1.09035	1.49238e-24	352.923	315.864	356.242	350.505	37.4413	43.4298	38.1086	38.7043	160.553	181.246	137.129	168.579
ENSDARG00000022309	dspa	1.0186	2.49488e-104	-0.247036	6.54807e-07	1283.8	1155.12	1316.74	1209.01	2541.42	2427.35	2626.56	2474.31	1062.58	1013.22	1055.17	1055.26
ENSDARG00000029402	sort1a	-2.02952	2.49948e-104	-2.67649	5.46857e-168	765.745	773.638	852.276	793.373	177.273	230.367	196.406	178.777	136.57	113.379	130.634	116.765
ENSDARG00000069334	zgc:114045	-4.32553	4.06722e-104	-1.23654	1.4297e-16	484.055	579.847	449.812	395.502	26.7438	35.8768	14.6571	16.5876	197.194	214.781	211.468	184.634
ENSDARG00000005015	tspy	-2.37458	4.17649e-104	-4.71967	1.53362e-244	1066.86	993.369	841.002	896.393	159.699	189.769	200.314	182.463	27.9802	40.7206	35.3649	40.1379
ENSDARG00000077694	dtnba	-1.6312	4.18651e-104	-0.642139	1.12921e-19	1123.52	1103.23	1158.91	1239.79	396.572	409.751	355.68	330.83	772.12	705.025	707.299	781.595
ENSDARG00000044899	tmem183a	-6.90183	7.06868e-104	-0.966614	9.43258e-15	691.275	698.868	529.854	622.857	1.52822	16.0501	0.977142	2.7646	332.431	322.571	293.746	348.835
ENSDARG00000077650	tnks	7.1479	7.58579e-104	5.80671	1.1903e-68	0	12.2073	6.76409	9.47311	1035.37	797.786	1202.86	1242.23	431.695	413.593	431.597	410.137
ENSDARG00000054539	NA	-4.37971	8.98688e-104	-1.60623	3.24441e-18	1180.19	1181.06	1169.06	1055.07	38.9695	94.4126	51.7885	35.0182	361.078	403.213	405.614	333.51
ENSDARG00000069807	zdhhc18a	-5.47783	9.00626e-104	-0.641688	0.0013405	862.88	848.407	660.626	693.905	8.40519	37.765	11.7257	11.0584	528.293	484.654	469.849	478.736
ENSDARG00000061976	sema6bb	-3.65201	9.77835e-104	-9.76946	4.14712e-40	665.373	682.083	511.816	536.415	38.2054	50.9828	57.6514	44.2335	0	1.59688	0	0.729781
ENSDARG00000098359	il17rd	-1.71046	1.04381e-103	-2.48617	3.32488e-211	3262.11	3341.75	3121.63	2980.48	1003.27	791.177	1026.98	1057	571.596	568.491	580.274	545.146
ENSDARG00000078392	chpfa	-3.8057	1.13909e-103	-2.62043	4.14498e-62	722.035	761.43	653.862	569.571	37.4413	69.8653	45.9257	40.5474	113.253	128.549	107.538	89.763
ENSDARG00000042825	NA	-4.02921	1.16242e-103	-0.9263	5.61003e-14	373.969	393.685	337.077	297.219	16.0463	30.212	15.6343	23.9598	194.529	192.425	168.886	178.796
ENSDARG00000039346	ndufa5	2.50369	1.31761e-103	1.25884	4.15021e-26	108.467	131.228	148.81	142.097	753.41	881.813	733.834	672.718	309.781	332.152	337.771	303.589
ENSDARG00000021569	gdap2	-2.60134	2.13339e-103	-4.66367	9.67322e-232	1299.99	1174.95	984.176	986.387	207.837	167.11	174.908	178.777	43.9689	51.1003	35.3649	44.5166
ENSDARG00000019417	gadd45ga	4.96715	2.66136e-103	5.99927	9.45826e-152	11.3324	9.15548	15.7829	18.9462	428.665	513.604	429.943	440.492	932.673	961.325	915.88	894.711
ENSDARG00000069421	grpel2	3.45967	2.75808e-103	2.64307	3.94224e-60	58.2808	70.192	68.7683	52.1021	702.979	514.549	776.828	754.735	386.393	376.865	389.014	407.947
ENSDARG00000059109	si:dkeyp-113d7.1	2.63862	3.88116e-103	4.42685	1.07648e-304	51.8052	59.5106	72.1503	88.8104	415.675	406.918	434.828	481.04	1510.26	1513.05	1412.43	1566.84
ENSDARG00000055052	map2	6.69349	5.38396e-103	4.51824	6.21348e-47	9.71347	7.62956	7.89144	7.10483	866.498	703.374	900.925	919.689	197.86	155.696	199.92	195.581
ENSDARG00000012341	capn9	1.0482	6.02344e-103	0.435357	1.74747e-18	1108.95	1094.08	974.029	1019.54	2265.58	2063.86	2158.51	2152.7	1427.66	1412.44	1431.2	1381.47
ENSDARG00000103021	NA	4.68636	6.0615e-103	0.530495	0.0422534	24.2837	13.7332	13.5282	20.1304	480.624	427.689	487.594	433.12	24.6492	26.3486	24.5389	27.0019
ENSDARG00000086098	NA	2.32372	8.40701e-103	0.920539	1.07158e-16	293.023	268.561	222.088	220.25	1270.71	1040.43	1392.43	1288.3	479.661	472.678	452.527	481.655
ENSDARG00000017037	ikbkg	4.27087	9.93964e-103	3.72034	6.83688e-78	24.2837	30.5183	29.3111	23.6828	566.204	401.253	543.291	583.33	349.753	387.245	354.371	339.348
ENSDARG00000021945	ddx23	0.970761	1.08296e-102	0.0428413	0.421603	926.018	924.703	969.52	972.178	1811.7	1818.39	1916.18	1906.65	988.634	1013.22	972.897	941.417
ENSDARG00000063466	isy1	1.77301	1.26106e-102	0.00733101	0.97948	299.499	263.983	242.38	249.853	961.248	822.334	905.811	892.043	269.809	246.719	268.485	267.829
ENSDARG00000011246	krr1	-1.47278	1.35907e-102	-0.5662	5.18738e-20	849.929	816.363	790.272	734.166	280.428	290.791	271.646	303.184	538.952	539.747	553.57	515.955
ENSDARG00000077291	rps2	0.675085	1.48445e-102	1.20211	0	4573.43	4631.15	4773.19	4516.3	7303.34	7136.65	7374.49	7726.12	10594.5	10582.6	10517.1	10871.5
ENSDARG00000101602	preb	2.60806	1.5553e-102	1.57447	5.58107e-37	97.1347	109.866	100.334	100.652	612.815	520.213	645.891	709.58	299.122	307.4	306.015	302.859
ENSDARG00000062837	spata13	-1.33418	2.03237e-102	0.0095922	0.923057	1285.42	1358.06	1518.54	1425.7	579.958	563.643	543.291	532.645	1395.68	1487.5	1345.31	1412.86
ENSDARG00000014047	cldn7b	-1.46325	2.05974e-102	-2.66571	0	4440.67	4487.71	3970.52	3796.35	1521.34	1432.24	1604.47	1491.04	724.154	647.537	633.682	621.043
ENSDARG00000091576	NA	-4.61525	2.09307e-102	-1.8607	1.31755e-23	867.737	796.526	807.182	867.974	29.8002	63.2564	16.6114	25.8029	221.843	246.719	224.459	224.772
ENSDARG00000002536	tm9sf4	2.47238	2.1162e-102	2.5823	1.38242e-113	64.7565	76.2956	91.3153	105.388	462.285	450.348	512.023	491.177	542.283	482.259	517.483	522.523
ENSDARG00000104637	fam219b	3.71317	2.13698e-102	3.12671	2.20862e-72	30.7593	38.1478	22.547	41.4449	453.116	367.265	483.685	434.042	280.468	296.222	291.58	289.723
ENSDARG00000045885	scaf11	-2.26873	3.52031e-102	-0.590356	5.09671e-11	445.201	489.818	562.547	555.361	98.5699	115.183	97.7142	117.035	349.753	325.764	350.763	342.997
ENSDARG00000070867	smx5	1.03272	3.85445e-102	1.02191	2.67622e-102	790.029	781.267	791.399	811.135	1701.67	1594.63	1661.14	1537.12	1611.53	1607.26	1649.88	1581.43
ENSDARG00000058461	NA	2.47145	4.06103e-102	2.82006	1.63529e-134	135.989	166.324	179.248	125.519	873.375	706.206	920.468	878.22	1004.62	1084.28	1096.31	1118.02
ENSDARG00000102974	baz2a	1.66773	4.1735e-102	1.70773	6.36075e-108	488.911	506.603	581.712	628.778	1835.39	1608.79	1775.47	1827.4	1707.46	1919.46	1779.8	1841.97
ENSDARG00000052522	snx11	2.52607	4.41154e-102	2.93517	3.26913e-141	79.3267	59.5106	99.2067	82.8897	471.455	461.678	517.885	431.277	602.907	657.118	614.917	624.692
ENSDARG00000035682	ltbp3	-5.30802	5.18377e-102	-2.44117	5.64141e-50	532.622	508.129	405.846	467.735	5.34876	24.5473	8.79428	10.1369	73.2815	92.6193	95.2688	90.4928
ENSDARG00000004785	cops2	-1.93993	5.36952e-102	-2.81612	1.05201e-195	1301.61	1309.23	1085.64	1058.62	333.151	295.511	304.868	300.419	176.542	175.657	161.668	159.092
ENSDARG00000062897	TNKS (1 of many)	-5.4528	6.02035e-102	-1.46956	6.33539e-37	391.777	425.73	350.605	345.768	6.87697	16.9943	4.88571	5.52919	146.563	131.743	135.686	129.901
ENSDARG00000014806	hacd2	2.34225	6.26568e-102	2.28221	5.96029e-98	93.8969	103.762	108.225	88.8104	483.68	473.951	526.68	523.43	498.314	518.988	451.084	456.843
ENSDARG00000011373	mknk2a	-2.78566	6.60006e-102	-3.90963	3.02906e-172	1086.29	1049.83	813.946	776.795	125.314	147.284	131.914	134.544	59.2914	57.4878	67.1212	62.7611
ENSDARG00000025254	s100a10b	-1.45484	6.7619e-102	-5.734	0	1342.08	1243.62	1224.3	1209.01	452.352	493.778	442.645	439.571	15.3225	27.9455	22.3737	29.1912
ENSDARG00000098272	nipbla	-3.62863	7.2945e-102	-0.170082	0.132728	323.782	315.864	275.073	303.139	16.8104	33.9885	27.36	21.1952	272.474	244.323	267.763	293.372
ENSDARG00000024478	mpc2	2.43837	7.61616e-102	1.4262	1.15383e-34	140.845	141.91	124.008	145.649	704.508	648.614	830.571	807.262	342.424	403.213	370.249	367.08
ENSDARG00000103383	dnah9	4.0285	7.64219e-102	2.69394	6.78249e-45	17.808	28.9923	28.1837	31.9717	459.229	386.147	449.485	490.255	179.207	153.301	190.538	183.905
ENSDARG00000045641	usp3	-6.09778	7.74484e-102	-3.26094	2.58313e-128	493.768	466.929	401.336	446.42	6.87697	10.3854	1.95428	6.45072	52.6294	47.1081	44.0258	43.7868
ENSDARG00000056621	ctcf	-1.54347	8.59969e-102	-0.181385	0.00574875	767.364	862.141	798.163	738.902	272.022	298.344	255.034	258.95	668.86	713.807	693.586	713.725
ENSDARG00000105208	TM6SF2 (1 of many)	4.28439	8.97296e-102	6.78406	1.45829e-259	24.2837	27.4664	19.1649	13.0255	379.762	476.784	367.406	377.828	2284.38	2285.94	2212.84	2272.54
ENSDARG00000005606	paxip1	2.89967	9.04524e-102	-1.54461	4.28075e-20	92.278	100.71	105.971	138.544	807.662	723.2	939.034	829.379	33.3098	33.5346	40.4171	43.7868
ENSDARG00000020623	baxa	2.58966	9.52738e-102	0.779604	9.31395e-10	142.464	112.918	113.862	119.598	697.631	646.726	768.034	819.242	190.532	197.215	237.45	210.177
ENSDARG00000006924	NA	-2.80947	9.74492e-102	-4.37139	7.23057e-152	451.676	463.877	394.572	432.211	59.6004	70.8094	55.6971	61.7426	17.9873	27.9455	15.1564	23.353
ENSDARG00000032553	egln3	-2.33159	9.94671e-102	-1.57417	4.55971e-63	430.631	402.841	387.808	386.029	77.939	71.7536	77.1942	91.2317	135.904	135.735	124.138	142.307
ENSDARG00000003091	oclnb	2.06095	1.1908e-101	-1.96292	4.17986e-56	234.742	257.879	216.451	195.383	958.956	889.366	954.668	947.335	50.6308	52.6972	74.3386	52.5442
ENSDARG00000027611	sdpra	3.96795	1.24286e-101	2.09437	1.75443e-27	27.5215	33.5701	19.1649	23.6828	423.316	414.471	364.474	390.73	116.584	101.402	110.425	105.818
ENSDARG00000068261	pros1	-2.44113	1.78397e-101	-0.37928	1.65948e-05	377.206	366.219	370.898	359.978	62.6569	81.1948	59.6057	68.1934	283.799	255.502	291.58	300.67
ENSDARG00000077928	NA	-1.24169	1.82708e-101	-0.981799	9.95995e-68	1709.57	1950.12	1932.28	1824.76	763.344	723.2	811.028	842.28	924.013	926.193	957.019	950.904
ENSDARG00000090386	NA	3.31632	2.32477e-101	1.25118	2.28249e-14	29.1404	35.096	72.1503	55.6545	507.368	456.013	521.794	510.529	117.25	122.162	114.756	122.603
ENSDARG00000030177	uchl3	3.60664	3.56571e-101	2.64483	1.14347e-53	16.1891	39.6737	30.4384	35.5242	394.28	347.438	382.063	387.043	205.188	191.626	196.312	182.445
ENSDARG00000021702	pdcd4a	2.0945	3.96597e-101	1.9692	2.19418e-90	127.894	105.288	136.409	152.754	569.26	523.99	593.125	570.428	506.975	552.522	516.761	494.061
ENSDARG00000067958	sh3gl1a	3.56346	4.48096e-101	-0.0623687	0.801318	35.6161	35.096	60.8768	43.8131	554.742	494.722	517.885	560.291	50.6308	49.5034	31.7563	40.1379
ENSDARG00000006487	anp32a	0.701413	4.84856e-101	0.455963	1.56665e-43	5146.52	5082.82	4795.74	4862.07	7939.85	7805.09	8412.22	8150.03	6855.15	6876.98	6813.89	6703.03
ENSDARG00000009178	zfand1	4.41532	4.84856e-101	4.33731	8.05234e-98	24.2837	10.6814	20.2923	26.051	407.27	386.147	507.137	473.667	421.035	418.384	435.205	404.298
ENSDARG00000038694	zgc:101744	-1.71846	8.0059e-101	-0.834196	1.42844e-28	929.255	997.947	919.917	984.019	277.371	347.438	275.554	264.48	532.29	542.941	565.117	507.927
ENSDARG00000001888	ppm1ba	2.1264	9.0471e-101	2.05716	2.47311e-95	163.51	131.228	157.829	159.859	722.846	574.028	700.611	683.777	624.225	653.126	635.126	645.856
ENSDARG00000015059	daam1a	4.65645	9.6458e-101	1.89986	1.02895e-16	25.9026	22.8887	27.0564	15.3938	599.825	440.907	650.777	610.976	83.2744	76.6505	87.3298	92.6821
ENSDARG00000079616	NA	-3.39034	1.03797e-100	-1.43615	4.92184e-38	271.977	308.234	286.347	325.638	25.9797	37.765	23.4514	26.7244	115.252	108.588	108.982	108.008
ENSDARG00000059773	SRCIN1	-4.90667	1.07482e-100	-1.97239	7.44977e-44	425.774	434.885	329.186	335.111	9.1693	16.0501	11.7257	13.823	91.2688	108.588	87.3298	99.9799
ENSDARG00000060030	setd1a	-3.76829	1.07646e-100	-2.07644	7.22753e-51	425.774	408.945	390.063	343.4	28.272	38.7092	24.4286	23.0383	113.253	79.8442	88.7732	87.5737
ENSDARG00000058306	prpf18	3.21238	1.12441e-100	2.34656	5.75774e-53	32.3782	39.6737	34.9478	54.4704	375.177	381.427	380.108	383.357	198.526	221.169	223.016	191.932
ENSDARG00000091092	zcchc10	-2.24514	1.17847e-100	-3.23109	3.05119e-187	1267.61	1304.66	1029.27	1004.15	241.458	254.914	232.56	239.598	138.569	114.177	121.251	113.846
ENSDARG00000034138	shisa2	4.61539	1.32447e-100	2.61382	1.70172e-31	6.47565	12.2073	21.4196	22.4986	393.516	411.639	421.148	414.689	103.26	97.41	105.373	102.899
ENSDARG00000012325		-1.25936	2.25244e-100	-0.470115	3.27013e-17	1264.37	1290.92	1362.96	1325.05	576.902	492.834	574.56	546.468	945.331	911.821	1001.77	930.47
ENSDARG00000023237	syne3	-3.06513	2.38324e-100	0.190015	0.0465577	302.736	289.923	272.818	277.088	36.6772	38.7092	30.2914	29.489	321.772	328.958	349.319	299.21
ENSDARG00000075129	mrps11	6.45414	2.5301e-100	5.57809	5.78143e-75	12.9513	3.05183	10.1461	5.92069	755.703	632.564	701.588	780.538	414.373	411.198	353.649	385.324
ENSDARG00000069538	gtf3c4	-3.672	2.54231e-100	-0.476469	1.75972e-06	284.928	270.087	264.927	259.326	16.8104	30.212	20.52	17.5091	199.859	179.65	194.868	198.5
ENSDARG00000007277	myf5	7.97097	2.85559e-100	-0.774885	0.16511	6.47565	6.10365	5.63674	2.36828	1308.15	1181.1	1380.7	1264.34	3.33098	2.39533	5.77387	0
ENSDARG00000016464	CDC42BPA	-3.86723	3.09295e-100	-2.27011	4.56738e-67	346.447	289.923	284.092	336.295	24.4515	25.4914	16.6114	18.4306	63.9547	62.2785	62.0691	71.5185
ENSDARG00000038905	hectd3	4.56152	5.0458e-100	4.55796	3.12256e-100	19.4269	16.785	20.2923	15.3938	430.957	360.656	442.645	478.275	419.037	420.779	423.658	445.166
ENSDARG00000027813	nus1	4.67025	9.10102e-100	3.99468	8.25702e-73	24.2837	12.2073	15.7829	14.2097	397.336	444.683	413.331	423.905	271.141	257.897	285.085	235.719
ENSDARG00000017400	klf1	-5.30176	1.38152e-99	-0.703288	1.24432e-06	461.39	506.603	366.388	355.242	7.64108	18.8825	9.77142	6.45072	256.485	232.347	267.041	277.317
ENSDARG00000037291	dpf2l	1.72731	1.39071e-99	0.619906	3.86644e-13	203.983	189.213	233.361	235.644	719.026	734.53	711.36	716.952	350.419	348.919	303.85	334.239
ENSDARG00000034189	oxsr1a	-5.14797	1.44663e-99	-0.741881	1.0934e-05	464.628	459.3	527.599	557.729	4.58465	31.1562	14.6571	7.37226	296.457	312.191	303.128	290.453
ENSDARG00000003940	mtfr1l	-2.25644	1.58672e-99	0.0241834	0.828867	411.204	384.53	456.576	404.975	87.1083	105.742	73.2857	81.0948	404.381	424.771	435.927	425.462
ENSDARG00000026454	mis12	4.67795	2.10396e-99	4.28167	2.59291e-83	11.3324	15.2591	16.9102	22.4986	414.911	383.315	470.005	483.804	317.109	349.718	321.893	342.267
ENSDARG00000022983	ccdc28a	-2.37245	2.25607e-99	0.673804	3.2575e-16	373.969	418.1	349.478	357.61	67.2415	90.6361	70.3542	60.8211	622.226	576.475	590.378	592.582
ENSDARG00000021110	poc1b	-2.79526	2.3442e-99	0.336978	0.000696489	406.347	393.685	357.37	309.06	42.0259	62.3123	53.7428	53.4489	444.352	449.523	479.231	469.979
ENSDARG00000036549	agpat3	-1.86557	2.34748e-99	-1.80999	2.54692e-97	1444.07	1272.61	1129.6	1123.75	321.689	341.774	358.611	339.124	337.761	355.307	376.745	343.727
ENSDARG00000070914	dusp6	0.955557	2.85833e-99	1.27295	1.25877e-178	2062.49	2127.12	1971.73	2106.58	4162.1	3681.15	4072.73	4104.5	4959.16	5122.81	4913.56	4974.18
ENSDARG00000037675	npm1b	-2.74838	3.37517e-99	-2.13967	8.40775e-67	961.634	917.074	915.407	925.996	136.011	185.049	96.7371	134.544	222.509	195.618	223.016	201.419
ENSDARG00000038228	NA	-1.39614	3.87695e-99	-0.170488	0.00807062	1643.2	1539.65	1439.62	1437.54	560.855	642.95	547.2	547.39	1308.41	1420.43	1323.66	1323.09
ENSDARG00000040534	epcam	0.942304	3.98887e-99	-0.30631	3.50454e-11	2455.89	2244.62	2209.6	2165.79	4384.45	4137.16	4476.29	4412.29	1795.4	1911.47	1810.11	1812.05
ENSDARG00000079366	ppp1r9ba	-7.16645	4.97078e-99	-1.1675	2.07022e-28	650.803	724.809	582.839	575.491	1.52822	14.1619	0	1.84306	301.12	271.47	277.146	274.397
ENSDARG00000017696	diexf	4.01504	5.79072e-99	4.04167	9.7658e-101	17.808	21.3628	37.2025	37.8924	479.86	388.036	532.543	530.802	498.314	506.212	451.805	510.846
ENSDARG00000026183	polr2eb	1.27669	6.69063e-99	1.02586	1.81959e-64	655.659	669.876	709.102	699.826	1571.77	1593.68	1712.93	1766.58	1479.62	1318.23	1406.66	1374.18
ENSDARG00000061235	alg5	1.76027	7.55494e-99	1.09305	5.95016e-38	194.269	195.317	229.979	251.037	760.287	709.983	735.788	774.087	471	503.019	448.918	455.383
ENSDARG00000037633	leng1	-3.68086	8.53429e-99	-3.50685	7.78663e-102	540.717	474.559	386.681	451.157	38.2054	45.318	29.3143	30.4106	46.6337	33.5346	36.0867	45.2464
ENSDARG00000030716	ing4	-2.1164	9.31628e-99	-1.01432	2.27095e-27	909.828	1008.63	843.257	827.713	191.027	250.193	212.04	174.17	453.013	447.128	433.762	439.328
ENSDARG00000036080	cd81a	-1.13506	1.06582e-98	-1.2202	2.55388e-115	3903.2	3825.46	3591.73	3618.73	1750.57	1515.32	1823.35	1705.76	1606.2	1626.43	1588.54	1585.81
ENSDARG00000060646	senp5	-4.97489	1.1573e-98	-1.96282	1.89282e-42	446.82	369.271	331.441	361.162	11.4616	20.7708	6.84	8.29379	101.262	87.8287	107.538	88.3034
ENSDARG00000046048	vapal	2.58579	1.3321e-98	1.98189	5.13799e-58	110.086	154.117	163.466	213.145	994.869	878.037	1019.16	1008.16	657.535	626.777	606.978	674.317
ENSDARG00000061774	mbd3a	-1.11515	1.64774e-98	-0.51563	1.13312e-25	1131.62	1194.79	1144.26	1139.14	513.481	519.269	548.177	548.311	770.788	793.652	816.281	842.897
ENSDARG00000079216	NA	-5.09972	2.05572e-98	-3.93318	3.05697e-110	401.49	379.952	330.313	373.004	12.2257	19.8266	4.88571	5.52919	21.9844	27.147	25.9824	21.8934
ENSDARG00000014986	acvr1l	-1.06392	2.14487e-98	-0.236717	5.59103e-07	1374.46	1400.79	1364.09	1348.73	681.584	652.391	675.205	611.897	1185.16	1124.21	1213.23	1129.7
ENSDARG00000037259	ndufb6	2.75453	2.34788e-98	2.56881	5.53836e-86	80.9456	102.236	64.2589	87.6263	509.66	585.358	557.948	591.623	448.349	549.328	455.414	520.334
ENSDARG00000043932	stmn4l	3.25691	2.34887e-98	2.96459	1.09647e-81	55.043	62.5624	46.2213	67.4959	540.988	438.074	614.623	618.348	441.021	441.539	457.579	465.6
ENSDARG00000058030	hspa14	1.72287	2.67929e-98	0.798251	2.25543e-21	244.456	326.545	333.695	294.851	1015.5	907.305	1058.25	1001.71	520.965	518.988	535.526	522.523
ENSDARG00000035023	kiaa0907	3.00031	4.4119e-98	2.78757	5.27016e-85	64.7565	65.6142	66.5136	81.7056	553.978	487.169	640.028	566.742	460.341	442.337	476.344	559.742
ENSDARG00000102591	btr30	5.1761	9.09722e-98	-0.45981	0.161676	4.85674	10.6814	28.1837	17.7621	580.722	521.157	650.777	641.386	15.9887	7.98442	12.2695	10.9467
ENSDARG00000014572	chpt1	-1.95432	9.27422e-98	-0.500065	2.97387e-08	1795.37	1924.18	1436.24	1547.67	433.249	476.784	382.063	433.12	1162.51	1197.66	1190.86	1180.06
ENSDARG00000098671	prelid1a	1.2509	9.61212e-98	0.983706	4.91289e-61	796.505	756.853	753.069	696.274	1773.49	1620.12	1891.75	1845.83	1477.62	1513.05	1487.49	1447.15
ENSDARG00000034060	elac2	-3.47278	1.03846e-97	-5.68747	5.50351e-138	647.565	582.899	554.656	573.123	60.3645	60.4241	42.0171	47.9197	4.66337	19.9611	15.1564	6.56803
ENSDARG00000010078	nup133	-3.87939	1.05783e-97	-3.77212	1.5929e-109	331.877	343.33	284.092	298.403	22.1591	26.4355	18.5657	17.5091	23.3168	21.5579	20.2085	26.2721
ENSDARG00000099236	sept10	3.07299	1.07236e-97	0.964121	2.8426e-10	80.9456	99.1843	124.008	108.941	872.611	685.435	988.868	974.059	211.85	202.804	213.633	186.824
ENSDARG00000040309	pxdc1b	3.1938	1.10581e-97	1.02988	9.15489e-11	82.5645	93.0807	100.334	89.9945	851.98	655.223	995.708	867.162	211.184	197.215	181.155	161.282
ENSDARG00000056145	si:dkey-159a18.1	-3.89894	1.18227e-97	-10.7636	2.05958e-28	380.444	395.211	329.186	314.981	22.9232	28.3238	22.4743	21.1952	0	0	0	0
ENSDARG00000002798	cog8	4.65505	1.33937e-97	0.179535	0.559522	11.3324	16.785	16.9102	22.4986	421.024	405.974	477.823	446.943	19.3197	20.7595	15.8781	22.6232
ENSDARG00000102995	rbm24a	3.62233	1.3505e-97	4.96895	9.01964e-188	27.5215	28.9923	27.0564	35.5242	390.459	424.857	326.366	339.124	956.656	946.154	940.419	927.551
ENSDARG00000042337	chrac1	1.29008	1.82826e-97	0.400863	2.49479e-10	825.645	730.912	766.597	772.058	1884.29	1719.25	1987.51	1973.92	1005.29	1058.73	1049.4	971.338
ENSDARG00000095947	adkb	-1.93781	1.91803e-97	-1.3196	2.22476e-52	848.31	706.498	738.413	839.554	219.299	213.372	177.84	204.58	305.784	291.431	337.771	318.914
ENSDARG00000040861	NA	-2.29147	3.02917e-97	-3.40879	4.28282e-173	624.9	671.402	586.221	603.911	120.729	130.289	138.754	117.956	57.959	70.2629	64.2343	41.5975
ENSDARG00000057867	lasp1	4.92958	3.15745e-97	3.08879	1.24383e-37	22.6648	10.6814	12.4008	13.0255	444.711	392.756	470.983	456.158	127.909	114.177	119.086	130.631
ENSDARG00000102167	ppox	-4.65099	3.71538e-97	-2.92635	3.98318e-69	456.533	447.092	394.572	335.111	16.0463	25.4914	14.6571	8.29379	51.9632	44.7128	58.4604	58.3824
ENSDARG00000023298	rps27.1	0.766652	4.0643e-97	-0.300423	1.39051e-15	4511.91	4068.08	4526.31	4315	7436.3	7657.8	7265.05	7292.08	3615.44	3541.89	3462.88	3530.68
ENSDARG00000055536	otub1a	1.23957	4.19908e-97	1.15218	3.95465e-85	637.851	556.958	630.188	581.412	1422.77	1344.44	1527.27	1391.51	1373.69	1336.59	1288.29	1351.55
ENSDARG00000035573	AK6	1.35385	5.26106e-97	0.57854	4.2267e-18	416.06	413.522	391.19	401.423	1060.58	986.611	1011.34	1076.35	618.895	584.46	641.621	570.688
ENSDARG00000103032	rap2b	-3.05933	5.57612e-97	-0.22788	0.104646	731.748	775.164	790.272	918.892	87.1083	141.619	72.3085	84.7809	670.192	701.831	709.464	667.019
ENSDARG00000008407	tspan7b	-2.81322	6.51653e-97	-8.42934	1.0396e-57	501.863	518.81	428.393	478.392	62.6569	68.9212	84.0342	58.978	1.33239	1.59688	1.44347	0.729781
ENSDARG00000060442	tmem259	-2.5588	7.0017e-97	-4.02078	8.72069e-181	862.88	708.024	691.065	647.724	125.314	137.842	120.189	108.741	44.6351	37.5268	42.5823	53.274
ENSDARG00000037677	fgf24	5.03647	9.36765e-97	-0.811648	0.0107168	11.3324	18.311	25.929	16.5779	656.369	477.728	698.657	614.662	9.99293	8.78287	10.1043	13.1361
ENSDARG00000008383	arpc1a	1.79068	1.00038e-96	0.6945	1.93237e-15	812.694	810.26	670.773	705.747	2575.04	2252.68	2794.63	2728.66	1193.16	1321.42	1139.62	1187.35
ENSDARG00000041071	jagn1a	3.93744	1.0664e-96	4.81007	1.13538e-146	9.71347	19.8369	32.6931	22.4986	340.028	331.388	337.114	364.005	645.543	599.63	654.612	612.286
ENSDARG00000037002	zgc:152968	-3.28952	1.55271e-96	-1.21653	4.95733e-25	312.45	386.056	301.002	324.454	36.6772	42.4857	24.4286	30.4106	142.566	149.309	145.068	131.361
ENSDARG00000053810	hnrnpc	-1.84639	1.76045e-96	-0.4127	6.24215e-07	1060.39	1086.45	897.37	876.263	246.043	265.299	276.531	300.419	712.163	718.598	756.377	748.755
ENSDARG00000087373	dnah5	-5.36709	1.90335e-96	-1.09261	1.6519e-05	4338.68	4264.93	3811.57	3816.48	58.8363	167.11	90.8742	72.801	1913.98	1913.07	1881.56	1885.02
ENSDARG00000039196	NA	2.22651	2.05434e-96	3.04232	2.24186e-187	139.226	106.814	76.6597	98.2835	508.132	500.387	451.44	464.452	834.743	851.938	864.637	840.707
ENSDARG00000099021	setdb1b	3.62338	2.13342e-96	5.09483	1.08705e-195	14.5702	12.2073	38.3299	34.34	329.331	314.394	351.771	320.693	930.675	910.224	930.315	877.196
ENSDARG00000057248	NA	-3.63654	2.77531e-96	-9.012	5.67956e-34	354.542	387.582	320.167	324.454	24.4515	33.9885	30.2914	23.0383	0.666195	0	1.44347	0
ENSDARG00000097478	qkia	-0.58502	2.94651e-96	0.190882	1.63114e-12	5104.43	5111.81	4879.17	4890.49	3345.26	3311.05	3344.76	3304.61	5622.69	5864.56	5669.22	5633.18
ENSDARG00000094010	NA	-2.69346	2.98883e-96	-1.9636	4.69957e-65	522.908	445.567	437.411	381.293	62.6569	76.4742	66.4457	70.0364	117.917	106.991	119.086	111.656
ENSDARG00000015805	cgnl1	-1.82826	3.24348e-96	-0.770115	6.07262e-19	3171.45	3443.99	2780.04	2683.26	849.688	733.586	945.874	868.083	1716.12	1757.37	1807.94	1793.8
ENSDARG00000021389	jag2b	-5.63933	3.49933e-96	-10.7915	3.97482e-28	675.086	645.461	499.416	485.497	8.40519	17.9384	15.6343	4.60766	0.666195	0	0	0
ENSDARG00000038518	snap29	-3.26141	3.51382e-96	-0.8881	7.00034e-15	361.017	300.605	323.549	305.508	34.3849	50.0387	25.4057	23.9598	170.546	176.456	171.773	177.337
ENSDARG00000006283	waslb	2.13559	4.6922e-96	-0.368627	0.00172174	176.461	131.228	152.192	171.7	737.364	734.53	653.708	651.523	122.58	126.952	130.634	109.467
ENSDARG00000058062	magt1	-1.19535	4.92213e-96	-1.67191	2.01764e-180	1345.32	1222.26	1156.66	1219.66	548.63	531.543	525.703	545.547	383.728	398.423	378.91	386.784
ENSDARG00000017445	eif3i	1.15055	5.18783e-96	0.445078	2.54591e-15	1670.72	1577.79	1545.6	1595.03	3595.89	3170.37	3670.15	3735.89	2101.85	2150.21	2199.12	2240.43
ENSDARG00000057321	tut1	3.25995	5.33999e-96	2.50361	1.65935e-56	58.2808	44.2515	78.9144	73.4166	623.512	490.001	678.137	701.286	365.741	373.671	360.145	375.837
ENSDARG00000078326	arhgap10	-3.42987	6.05799e-96	-0.825216	3.21197e-12	339.971	328.071	330.313	301.955	23.6873	43.4298	26.3828	27.646	163.884	190.828	207.859	170.769
ENSDARG00000012946	syap1	-1.01364	6.52829e-96	-0.34106	1.33033e-13	1588.15	1499.97	1533.19	1628.19	768.693	811.004	774.874	742.755	1270.43	1173.71	1229.83	1258.87
ENSDARG00000045262	gsnb	-3.32059	1.05419e-95	-0.575069	1.02645e-06	344.828	373.849	311.148	325.638	35.149	50.0387	29.3143	20.2737	237.166	218.773	214.355	236.449
ENSDARG00000037363	NA	-7.05512	1.09427e-95	-0.914204	2.39851e-34	566.619	552.38	526.472	573.123	0	12.2736	2.93143	1.84306	285.798	295.424	293.746	301.399
ENSDARG00000057676	golga7	1.43805	1.10818e-95	-0.776497	1.77668e-27	2060.87	2029.46	1908.6	1846.07	5445.03	4588.45	5754.39	5452.7	1122.54	1193.67	1167.04	1092.48
ENSDARG00000062846	tmtc3	-2.51798	1.19208e-95	-0.15902	0.119901	393.396	392.16	435.157	367.083	66.4774	74.5859	60.5828	75.5656	370.405	346.524	389.736	315.995
ENSDARG00000030514	acsl1a	-6.89779	1.23145e-95	-9.47854	5.16528e-45	657.278	662.246	547.892	515.1	4.58465	8.49713	5.86285	0.921532	1.33239	0.798442	0.721734	0
ENSDARG00000099222	prpsap1	2.55862	1.51052e-95	2.78862	3.25339e-115	92.278	83.9252	80.0418	105.388	553.978	456.957	567.72	556.605	623.559	622.785	575.943	683.075
ENSDARG00000036060	exosc6	4.01281	1.63241e-95	4.4317	1.08332e-117	11.3324	7.62956	34.9478	29.6035	333.915	362.544	403.56	364.927	475.663	482.259	489.335	507.927
ENSDARG00000100057	NA	-5.70724	2.28713e-95	-0.98265	4.39912e-19	383.682	407.419	351.733	338.664	1.52822	18.8825	3.90857	4.60766	178.54	190.029	191.981	186.824
ENSDARG00000023303	zgc:66427	1.75727	2.30882e-95	1.05462	1.16253e-34	469.484	335.701	394.572	399.055	1334.9	1205.65	1430.54	1428.37	844.736	848.744	806.898	816.624
ENSDARG00000074757	arv1	-6.08355	2.52771e-95	-1.92639	6.25099e-44	552.049	459.3	403.591	387.213	4.58465	7.55301	7.81714	6.45072	111.921	111.782	131.356	116.765
ENSDARG00000015866	apoa2	3.82727	2.83498e-95	4.4825	2.02407e-132	25.9026	19.8369	38.3299	20.1304	326.274	418.248	393.788	381.514	628.222	595.638	603.369	561.201
ENSDARG00000098681	NA	2.87262	3.0138e-95	-0.735466	2.98648e-06	93.8969	148.014	127.39	120.782	923.042	726.977	964.439	989.725	79.2772	69.4645	79.3907	66.41
ENSDARG00000036074	cebpa	3.62013	4.12764e-95	4.54883	1.42372e-152	19.4269	24.4146	38.3299	44.9973	437.07	333.276	421.148	440.492	760.129	816.806	754.212	779.406
ENSDARG00000061174	znf740b	4.07767	4.7438e-95	3.94095	3.9943e-89	12.9513	30.5183	20.2923	22.4986	384.346	361.6	384.017	340.045	301.786	342.532	362.31	332.05
ENSDARG00000014722	her1	2.08282	4.91584e-95	-1.58334	1.30331e-41	284.928	305.183	316.785	279.457	1242.44	1072.53	1427.6	1291.07	109.922	98.2084	92.3819	94.8715
ENSDARG00000092199	si:ch211-250c4.4	4.70475	6.92432e-95	1.02403	3.09942e-05	19.4269	24.4146	21.4196	43.8131	751.118	523.99	783.668	856.103	55.9604	55.0925	57.017	58.3824
ENSDARG00000104066	dnaja2	-0.941608	8.76777e-95	-1.43558	3.01814e-216	6338.04	5990.73	5725.8	5685.05	3068.66	2907.91	3207.96	3166.38	2281.72	2168.57	2187.57	2129.5
ENSDARG00000059227	fabp1b.1	2.14755	9.76851e-95	2.54035	1.03145e-134	181.318	161.747	184.885	197.751	830.585	937.517	697.68	763.95	1019.94	1046.76	1078.27	1097.59
ENSDARG00000010149	atp5a1	0.85711	9.8799e-95	0.026934	0.600034	1136.48	1153.59	1089.02	1117.83	2037.88	1936.4	2059.82	2097.41	1157.85	1138.58	1137.45	1139.19
ENSDARG00000016889	eif3g	1.22102	1.12458e-94	1.85033	1.06903e-226	535.86	584.425	556.91	564.834	1303.57	1266.07	1380.7	1280.01	2013.24	1926.64	1981.88	2165.99
ENSDARG00000045331	pkp4	-2.31826	1.21202e-94	-0.348216	0.000645394	686.419	672.928	674.155	667.854	123.021	178.44	111.394	129.014	497.648	590.049	516.04	518.874
ENSDARG00000021488	cyth1b	7.98613	1.24488e-94	2.73588	1.56441e-11	9.71347	4.57774	4.5094	1.18414	1220.28	1135.78	1324.03	1233.93	43.3027	23.9533	27.4259	32.8401
ENSDARG00000003818	prkag1	-3.15771	1.35611e-94	-1.58196	7.69544e-32	668.611	585.95	545.637	446.42	53.4876	80.2507	61.56	56.2134	199.859	189.231	186.207	172.228
ENSDARG00000018914	hnrnpk	-0.798937	1.58633e-94	0.2706	9.93615e-14	2635.59	2357.54	2481.29	2409.72	1429.65	1434.13	1391.45	1419.16	2940.59	2983.78	2945.4	3043.91
ENSDARG00000024324	arhgap1	-3.1651	2.09987e-94	0.867087	2.27429e-13	438.725	459.3	355.115	377.74	44.3183	67.9771	38.1086	30.4106	745.472	758.52	731.838	729.051
ENSDARG00000016443	eif3c	1.43624	2.25881e-94	0.415766	5.64102e-09	1045.82	1077.29	1234.45	1231.5	3049.56	2856.92	3211.87	3337.79	1467.63	1628.82	1477.39	1566.84
ENSDARG00000039136	cox16	2.61403	2.5862e-94	0.890359	2.92482e-11	84.1834	88.5029	89.0606	100.652	537.932	491.89	600.943	601.76	163.218	175.657	148.677	188.283
ENSDARG00000070570	ppp4ca	-1.59321	4.22569e-94	0.0881048	0.235176	747.937	715.653	789.144	654.829	214.714	253.026	242.331	256.186	770.122	784.869	767.203	768.459
ENSDARG00000103619	NA	2.7529	4.22569e-94	2.63225	1.31962e-86	79.3267	80.8734	56.3674	93.547	528.763	437.13	557.948	558.448	490.32	463.895	494.388	466.33
ENSDARG00000103523	nudt6	-2.21465	4.73852e-94	-2.11285	4.64809e-94	531.003	563.062	481.378	470.103	117.673	108.574	109.44	102.29	120.581	99.8053	127.747	121.873
ENSDARG00000060016	nsd1a	-2.91659	5.62514e-94	-0.944481	1.17411e-13	764.126	602.736	676.409	627.593	104.683	109.519	79.1485	58.0565	343.091	345.726	355.093	342.267
ENSDARG00000079000	tp53bp1	-4.61126	6.83714e-94	-7.33433	7.96423e-58	330.258	289.923	308.894	303.139	8.40519	16.9943	15.6343	10.1369	0.666195	1.59688	1.44347	3.6489
ENSDARG00000030753	prrg4	-2.25245	9.13691e-94	-0.667955	9.3651e-12	620.043	700.394	558.038	620.489	115.38	160.501	129.96	118.878	409.044	407.206	394.067	359.052
ENSDARG00000098924	suz12b	-3.97147	1.15057e-93	-1.53539	1.14986e-25	433.868	439.463	374.28	301.955	18.3386	28.3238	31.2686	21.1952	121.248	144.518	140.016	126.982
ENSDARG00000039378	rcn2	-1.31202	1.18416e-93	-1.3323	2.1439e-101	1079.81	1062.04	1061.96	949.679	437.834	407.862	427.988	394.416	397.052	422.376	402.727	425.462
ENSDARG00000053691	maea	2.19194	1.36434e-93	1.96499	1.19668e-75	147.321	154.117	161.211	168.148	712.913	617.458	834.48	732.618	608.236	591.646	625.743	648.775
ENSDARG00000071558	fblim1	3.11496	1.36434e-93	2.28923	5.59062e-50	33.9971	56.4588	49.6033	33.1559	381.29	338.941	381.086	401.788	215.181	216.378	196.312	220.394
ENSDARG00000054301	kti12	3.39812	1.44292e-93	2.82679	1.89753e-64	32.3782	22.8887	36.0752	31.9717	325.51	321.947	347.863	328.065	211.184	225.161	236.007	218.204
ENSDARG00000061486	DNAH10	-3.02029	1.51825e-93	-4.49874	3.42037e-160	841.834	875.874	689.937	686.8	93.2212	73.6418	104.554	108.741	25.9816	33.5346	33.1997	43.7868
ENSDARG00000029931	atp13a1	1.8912	1.56566e-93	0.78377	2.06966e-16	195.888	213.628	240.125	221.434	883.309	716.591	844.251	805.419	377.067	392.834	355.093	384.594
ENSDARG00000061377	efcab1	-3.41	1.66218e-93	0.37003	0.00404558	361.017	369.271	370.898	439.315	38.9695	52.871	33.2228	19.3522	479.661	501.422	550.683	462.681
ENSDARG00000099640	eed	2.79115	1.74654e-93	2.48744	1.79084e-74	85.8023	106.814	104.843	111.309	778.626	546.649	769.988	753.813	543.615	593.243	602.648	569.959
ENSDARG00000058593	sri	-2.09555	1.9369e-93	-0.0331563	0.748559	464.628	474.559	417.119	421.553	87.8724	126.513	104.554	97.6824	421.035	447.128	440.979	422.543
ENSDARG00000075559	ppm1g	1.41748	2.28215e-93	-0.622342	5.54456e-17	650.803	621.046	692.192	603.911	1659.64	1602.18	1815.53	1790.54	414.373	455.911	415.719	384.594
ENSDARG00000104018	mtpn	1.24545	2.40524e-93	2.02163	8.31211e-261	459.771	428.781	414.864	426.29	1086.56	992.276	980.074	1023.82	1748.76	1736.61	1824.54	1691.63
ENSDARG00000079780	NA	-1.32082	2.48071e-93	-1.5808	2.01437e-133	3142.31	3010.63	2860.08	2699.84	1191.24	1043.26	1205.79	1242.23	929.342	1017.22	1002.49	963.31
ENSDARG00000089981	rnf146	-4.14974	3.16114e-93	-0.0335458	0.84926	293.023	328.071	350.605	294.851	9.9334	35.8768	12.7029	13.823	308.448	310.594	300.241	319.644
ENSDARG00000017338	kidins220b	-2.90686	3.19877e-93	-0.708331	1.62983e-11	325.401	309.76	316.785	293.666	52.7235	41.5415	32.2457	36.8613	190.532	185.239	210.746	174.418
ENSDARG00000032997	rnf185	1.66736	3.80088e-93	1.26031	1.74317e-53	276.834	311.286	342.714	320.902	984.935	896.92	1072.9	1045.94	750.802	771.295	710.186	784.514
ENSDARG00000027183	namptb	-5.4645	5.18482e-93	-0.0847051	0.609045	471.103	407.419	306.639	384.845	8.40519	17.9384	3.90857	4.60766	393.721	358.501	349.319	372.918
ENSDARG00000044625	pcf11	2.30162	6.01324e-93	-1.36474	9.37913e-27	265.502	263.983	252.526	273.536	1308.92	1075.36	1452.03	1370.32	100.595	83.038	106.095	118.954
ENSDARG00000077643	lypd6b	1.20235	6.08819e-93	0.480807	1.87407e-15	488.911	529.492	529.854	519.837	1194.3	1117.84	1217.52	1238.54	742.142	684.265	718.125	745.106
ENSDARG00000043287	atg101	4.07037	7.49887e-93	2.10145	3.83755e-24	19.4269	18.311	22.547	27.2352	383.582	342.718	353.726	422.983	98.5969	95.0146	93.1036	97.0608
ENSDARG00000017337	zgc:77929	4.45012	8.00093e-93	2.37284	7.43808e-26	9.71347	13.7332	21.4196	24.8669	403.449	356.88	431.897	412.846	92.6011	83.8364	105.373	97.7906
ENSDARG00000045913	mrps10	3.58407	8.21072e-93	2.81764	6.54944e-57	12.9513	32.0442	33.8205	33.1559	374.413	343.662	334.183	336.359	218.512	187.634	204.972	205.068
ENSDARG00000017821	gata5	1.63151	9.12932e-93	3.09072	0	189.413	276.19	241.253	251.037	728.959	684.491	794.417	775.93	2003.25	2052	2073.54	2073.31
ENSDARG00000063624	gfm1	-2.76942	9.41681e-93	0.625699	1.11866e-10	328.639	334.175	329.186	298.403	45.0824	67.9771	33.2228	42.3905	466.337	510.205	488.614	523.982
ENSDARG00000056491	ikzf5	-2.62914	9.78061e-93	-0.453664	8.17758e-05	645.946	682.083	543.382	592.069	93.2212	134.066	91.8514	78.3302	425.699	462.298	468.405	438.598
ENSDARG00000042796	yy1a	-1.69751	1.12025e-92	-0.891305	6.07072e-30	1031.25	955.221	948.1	1018.36	318.633	354.047	278.486	265.401	507.641	536.553	566.561	519.604
ENSDARG00000045036	cdc42ep4b	-2.80867	1.1541e-92	-3.77641	1.15632e-129	348.066	376.9	370.898	332.743	52.7235	58.5358	42.9943	48.8412	19.9859	24.7517	28.1476	31.3806
ENSDARG00000045691	zcrb1	-2.76492	1.43989e-92	-0.245058	0.0361324	435.487	466.929	459.958	453.525	62.6569	99.1332	58.6285	46.9981	392.389	381.655	378.188	380.216
ENSDARG00000043555	tmem30ab	-3.36458	1.47262e-92	-2.95395	4.03259e-82	501.863	543.225	549.019	542.335	52.7235	75.5301	31.2686	46.9981	65.2871	80.6427	63.5126	66.41
ENSDARG00000100894	NA	3.46889	1.69443e-92	3.18176	5.14547e-78	32.3782	24.4146	30.4384	37.8924	332.387	315.338	384.994	373.22	297.789	286.641	274.981	291.182
ENSDARG00000017489	zgc:123068	1.7322	1.95034e-92	-0.0387587	0.731025	234.742	251.776	286.347	326.822	890.95	924.299	947.828	927.983	280.468	247.517	282.198	269.289
ENSDARG00000045417	fam49bb	-6.25756	2.27826e-92	-9.22925	2.3051e-42	568.238	531.018	483.633	428.658	4.58465	15.106	3.90857	2.7646	0	0.798442	0.721734	1.45956
ENSDARG00000036967	smox	5.98667	2.31458e-92	2.73029	3.0183e-19	9.71347	13.7332	13.5282	3.55242	673.179	497.554	713.314	695.757	64.6209	67.0692	76.5038	61.3016
ENSDARG00000052907	bcl7a	-1.61415	2.78912e-92	-4.12631	0	1316.18	1268.03	1314.49	1182.95	432.485	370.097	460.234	395.337	75.2801	74.2551	61.3474	79.5461
ENSDARG00000071868	znf711	-7.40787	2.89193e-92	-6.65025	9.65237e-132	815.932	762.956	615.532	615.752	3.82054	8.49713	2.93143	0.921532	8.66054	9.58131	5.05214	4.37868
ENSDARG00000044357	NA	-2.70399	2.95384e-92	-1.9919	4.34689e-63	501.863	447.092	393.445	409.712	64.9492	72.6977	71.3314	58.978	95.2659	106.991	111.147	125.522
ENSDARG00000103977	terf2ip	4.93388	3.02053e-92	1.64639	2.72127e-10	9.71347	13.7332	15.7829	14.2097	434.777	374.818	437.76	433.12	45.9675	41.519	43.304	40.8677
ENSDARG00000091831	ddx27	1.92049	3.84102e-92	2.70203	1.50317e-192	123.037	119.021	129.645	117.23	470.691	455.069	473.914	455.237	764.126	772.094	806.176	847.275
ENSDARG00000018319	arglu1b	-1.41397	3.88801e-92	0.291924	9.64299e-07	686.419	727.86	635.825	671.407	252.156	272.852	245.263	247.892	815.423	865.511	836.489	805.678
ENSDARG00000089210	NA	4.37359	3.9539e-92	4.69744	5.47057e-107	14.5702	10.6814	24.8017	20.1304	384.346	327.612	388.903	424.826	507.641	465.492	446.753	489.683
ENSDARG00000045549	bik	5.28993	4.01964e-92	4.04519	1.21172e-53	4.85674	6.10365	12.4008	18.9462	471.455	458.845	448.508	411.003	206.521	186.836	172.494	189.013
ENSDARG00000069192	zgc:163030	-2.35011	5.97321e-92	0.417517	9.18011e-07	293.023	355.538	359.624	317.349	58.0722	61.3682	68.4	73.7226	438.356	455.911	452.527	429.111
ENSDARG00000098433	utp6	1.60111	7.09357e-92	-1.38275	1.60166e-52	433.868	425.73	440.793	404.975	1304.33	1132.95	1368	1367.55	165.883	167.673	168.164	151.794
ENSDARG00000005891	cyb5r3	-3.30495	7.13256e-92	-11.3566	2.13805e-31	665.373	547.803	525.345	494.97	46.6106	51.9269	54.72	72.801	0	0	0	0
ENSDARG00000010794	tfeb	-4.49587	9.21123e-92	-2.81224	1.16532e-68	393.396	363.167	293.111	313.797	16.0463	17.9384	9.77142	15.666	43.3027	57.4878	51.9648	40.8677
ENSDARG00000022768	gid8a	2.17666	1.0801e-91	2.24627	1.25303e-99	92.278	79.3475	103.716	101.836	414.147	405.974	456.325	450.629	447.683	433.554	469.849	459.032
ENSDARG00000034693	mysm1	-4.06621	1.1168e-91	-6.49543	7.56836e-108	620.043	621.046	542.255	477.208	29.8002	41.5415	21.4971	41.4689	7.99434	0.798442	10.1043	5.10846
ENSDARG00000013379	ppp6r3	-2.11785	1.13049e-91	0.0965507	0.385825	1389.03	1284.82	1365.22	1263.48	293.417	400.309	260.897	266.323	1440.98	1420.43	1398.72	1408.48
ENSDARG00000005926	ak2	1.3682	1.38734e-91	1.25106	1.23219e-77	378.825	402.841	454.322	425.106	1113.31	1081.02	978.119	1138.09	995.962	997.254	990.219	993.961
ENSDARG00000101752	NA	-4.04214	1.39044e-91	0.493847	4.30076e-07	249.312	268.561	234.489	230.907	12.9898	21.7149	18.5657	6.45072	338.427	353.71	326.224	361.241
ENSDARG00000017901	tln2a	-4.49475	1.4738e-91	0.225576	0.0292092	294.642	257.879	229.979	261.695	7.64108	18.8825	9.77142	10.1369	309.781	293.827	305.293	305.048
ENSDARG00000076847	tnrc6c1	-3.29255	1.53169e-91	-2.56543	6.52608e-73	424.155	407.419	346.096	343.4	41.2618	50.9828	27.36	34.0967	58.6252	60.6816	65.6778	70.7887
ENSDARG00000030064	plekha1a	3.20322	2.2832e-91	3.50311	4.83257e-111	33.9971	41.1996	28.1837	42.629	340.028	300.232	339.068	362.162	408.378	429.562	422.936	391.892
ENSDARG00000030479	hmgb1b	1.06717	2.88628e-91	0.761178	4.65759e-47	2185.53	2182.06	2143.09	2125.53	4567.84	4033.31	4740.12	4748.65	3591.46	3767.85	3702.49	3572.28
ENSDARG00000100577	NA	-4.39256	3.10846e-91	-7.03346	7.28658e-62	296.261	292.975	276.2	322.086	12.9898	19.8266	12.7029	11.0584	3.33098	0.798442	0.721734	3.6489
ENSDARG00000093188	NA	-1.60417	3.32121e-91	0.0680984	0.412066	1219.04	1120.02	1023.63	974.546	358.367	324.779	360.566	377.828	1177.17	1136.98	1155.5	1063.29
ENSDARG00000014340	rab11al	-4.59644	3.43848e-91	-10.2672	8.58173e-26	422.536	460.826	352.86	361.162	9.9334	24.5473	16.6114	15.666	0.666195	0	0	0
ENSDARG00000033899	ap2m1b	4.9109	3.99815e-91	-1.57695	3.27853e-06	19.4269	21.3628	19.1649	24.8669	651.784	460.733	731.88	733.539	7.99434	6.38754	7.93907	5.83824
ENSDARG00000104024	ccdc137	3.90652	4.14126e-91	5.0557	1.49881e-155	22.6648	13.7332	19.1649	26.051	313.284	324.779	299.983	307.792	704.168	693.048	669.769	696.94
ENSDARG00000079905	mark2a	-2.19167	4.48029e-91	0.948756	1.36798e-27	479.198	512.707	443.048	423.922	108.503	121.792	93.8057	80.1733	842.071	878.287	926.706	929.74
ENSDARG00000005791	rpl28	1.16066	4.88435e-91	-0.231744	9.94783e-05	2313.42	2420.1	2663.93	2682.07	5610.85	6047.13	5343.01	5570.66	2105.18	2069.56	2150.04	2271.81
ENSDARG00000005789	enpp1	-6.38321	5.04332e-91	-0.15698	0.202424	466.247	495.922	432.902	377.74	1.52822	15.106	0.977142	3.68613	399.051	376.865	432.318	376.567
ENSDARG00000091280	si:ch211-66k16.27	1.89311	5.06533e-91	-0.0643933	0.588006	304.355	239.568	219.833	222.618	924.571	840.272	983.005	883.749	224.508	241.13	236.729	232.8
ENSDARG00000104735	nkx6.2	4.75314	5.50484e-91	0.775275	0.00363954	19.4269	13.7332	20.2923	18.9462	528.763	386.147	514.954	554.762	29.3126	28.7439	31.7563	35.7592
ENSDARG00000039490	pitpnaa	-3.7519	5.7962e-91	-2.39514	2.10903e-52	498.625	469.981	399.081	400.239	31.3284	46.2622	17.5886	35.0182	95.9321	71.8598	81.5559	84.6545
ENSDARG00000003854	acsl1b	1.46586	6.03544e-91	1.25014	6.43795e-67	281.691	312.812	276.2	259.326	806.898	747.748	787.577	763.028	694.175	677.079	678.43	625.422
ENSDARG00000038954	ctnnbip1	1.76464	6.40468e-91	0.59332	2.21128e-11	1614.06	1797.53	1617.75	1564.25	5616.96	4535.58	6232.21	6019.45	2390.31	2537.45	2519.57	2498.04
ENSDARG00000038422	entpd4	-3.13566	7.58311e-91	-0.793504	1.22514e-10	336.734	433.359	395.699	341.032	38.2054	56.6475	34.2	42.3905	229.837	208.393	235.285	194.851
ENSDARG00000071583	gtf3ab	3.12376	1.01025e-90	2.11572	4.05753e-41	37.235	38.1478	49.6033	60.3911	414.911	377.65	455.348	407.317	180.539	226.758	202.807	213.826
ENSDARG00000036577	atp6v0cb	5.20685	1.09435e-90	6.23809	8.55769e-131	22.6648	10.6814	9.01879	5.92069	399.628	385.203	484.663	436.806	870.051	859.124	907.219	846.545
ENSDARG00000055759	efhd2	-0.918363	1.4203e-90	-1.16929	1.84287e-146	4335.45	4435.83	3999.83	3895.82	2237.31	2242.3	2205.41	2120.44	1828.04	1897.9	1839.7	1836.13
ENSDARG00000030022	nup188	-3.31931	1.4905e-90	0.0669299	0.577317	250.931	279.242	234.489	260.51	19.8668	39.6533	24.4286	19.3522	270.475	273.866	259.102	267.829
ENSDARG00000012949	scml2	2.36971	1.53613e-90	0.620142	5.22197e-07	174.842	161.747	157.829	148.017	897.063	692.044	876.497	844.123	228.505	236.339	285.807	233.53
ENSDARG00000101627	ssr1	3.24315	1.70376e-90	1.84021	2.00716e-29	92.278	80.8734	101.461	138.544	1003.27	743.027	1057.27	1155.6	394.388	379.26	357.258	364.89
ENSDARG00000105013	hoxa9a	7.40749	2.13293e-90	-0.777952	0.15229	4.85674	1.52591	5.63674	8.28897	935.268	824.222	994.731	935.355	4.66337	3.99221	1.44347	2.18934
ENSDARG00000076659	cdca7b	1.40439	2.65916e-90	-1.18112	4.82848e-46	343.209	355.538	361.879	333.927	920.75	860.099	940.011	972.216	150.56	152.502	160.225	151.794
ENSDARG00000097481	si:dkey-77f5.11	-6.31398	2.66729e-90	-2.3204	2.41815e-57	479.198	512.707	447.557	386.029	3.05643	16.0501	0	3.68613	88.604	96.6115	82.9994	96.331
ENSDARG00000038505	polr2h	1.26979	2.70689e-90	0.714278	5.56016e-29	569.857	537.121	510.689	561.282	1333.37	1199.98	1377.77	1333.46	856.061	936.573	884.124	893.981
ENSDARG00000067805	ggcx	-2.5536	2.83489e-90	-1.56173	6.736e-47	318.926	407.419	390.063	387.213	63.421	70.8094	55.6971	66.3503	127.243	141.324	121.973	120.414
ENSDARG00000036005	pitpnb	-2.6283	2.9169e-90	-1.10919	3.69324e-24	440.344	408.945	390.063	364.715	52.7235	85.9154	56.6743	64.5072	173.211	194.82	186.929	186.824
ENSDARG00000071679	mydgf	1.74092	3.04852e-90	1.94977	1.29444e-116	169.986	160.221	170.23	176.437	581.486	516.437	568.697	600.839	625.557	660.312	665.438	672.128
ENSDARG00000058206	NA	4.10462	3.1911e-90	6.19143	5.56574e-209	16.1891	21.3628	19.1649	22.4986	343.084	409.751	299.006	333.595	1451.64	1469.13	1445.63	1522.32
ENSDARG00000057114	HPF1	2.80105	3.39687e-90	1.15191	9.17585e-16	131.132	111.392	154.447	110.125	933.74	683.547	966.394	968.53	271.808	281.85	298.076	280.236
ENSDARG00000016598	ckmt1	2.54107	4.58095e-90	3.31368	1.1097e-156	95.5158	82.3993	90.1879	95.9152	500.491	647.67	493.457	484.726	882.709	886.271	933.923	928.281
ENSDARG00000004402	elovl6	-6.88846	4.8722e-90	-9.61192	8.22272e-38	529.384	524.914	480.251	507.995	1.52822	11.3295	1.95428	2.7646	0.666195	0.798442	0.721734	0
ENSDARG00000005883	rfx1a	-1.92367	5.39773e-90	-2.21164	8.87517e-119	802.98	686.661	695.574	722.325	182.622	162.39	201.291	219.325	165.216	162.882	146.512	151.794
ENSDARG00000096306	NA	5.83722	6.36256e-90	3.08813	2.97359e-25	4.85674	19.8369	14.6555	8.28897	706.8	494.722	853.045	729.853	102.594	103.798	114.756	91.9524
ENSDARG00000040041	mcm4	2.99399	6.36762e-90	-1.42002	3.61505e-17	160.272	149.539	191.649	165.779	1367.75	978.114	1477.44	1522.37	69.9505	59.8832	65.6778	54.0038
ENSDARG00000042671	c2h1orf27	-2.58885	6.59821e-90	-0.30791	0.00393557	448.439	375.375	384.426	383.661	77.1749	67.9771	64.4914	52.5273	306.45	362.493	322.615	292.642
ENSDARG00000074985	aurkaip1	3.3758	6.74722e-90	2.85801	1.77277e-64	27.5215	41.1996	65.3862	80.5214	612.051	525.878	588.24	587.016	419.703	356.904	405.614	432.76
ENSDARG00000038500	cep41	-4.98078	7.26229e-90	-3.08975	9.83939e-74	429.012	375.375	305.512	313.797	16.0463	6.60888	11.7257	9.21532	39.9717	37.5268	44.7475	43.7868
ENSDARG00000035679	si:rp71-45k5.4	1.0972	7.31164e-90	1.49471	2.16976e-174	518.052	527.966	588.476	583.78	1250.84	1189.6	1150.1	1178.64	1528.92	1570.54	1592.14	1598.22
ENSDARG00000074688	NA	-1.44297	7.5895e-90	-0.521563	4.70274e-15	977.823	972.006	868.059	843.107	335.443	308.729	360.566	337.281	655.536	634.762	606.256	644.396
ENSDARG00000038159	tcf7l1a	1.55969	9.47045e-90	2.56444	2.01874e-257	270.358	257.879	208.56	221.434	690.754	729.809	664.457	707.737	1345.71	1399.67	1385.73	1474.16
ENSDARG00000037618	ddit4	1.64729	1.04425e-89	1.19867	5.24243e-48	1408.45	1246.67	1166.81	1119.01	3748.71	3349.76	4199.76	4155.19	2842.66	2909.52	2824.14	2745.43
ENSDARG00000091277	adra2da	-3.38567	1.07877e-89	-0.0316569	0.877356	574.714	611.891	464.468	431.026	38.9695	69.8653	51.7885	38.7043	478.328	552.522	498.718	502.089
ENSDARG00000071029	NA	3.18435	1.28532e-89	2.32237	2.86567e-47	48.5674	39.6737	47.3486	43.8131	411.854	339.885	445.577	440.492	222.509	221.967	245.389	210.907
ENSDARG00000044011	xkrx	3.6595	1.2882e-89	0.669723	0.00110432	27.5215	18.311	43.9666	30.7876	386.639	426.745	382.063	381.514	49.9646	50.3019	57.7387	40.1379
ENSDARG00000101980	bmper	-5.62641	1.51493e-89	-0.718686	6.24215e-07	453.295	439.463	342.714	304.324	4.58465	12.2736	8.79428	5.52919	218.512	241.13	236.729	234.989
ENSDARG00000091655	gcsha	2.3747	1.56063e-89	1.01073	4.79149e-16	69.6132	80.8734	86.8059	84.0738	417.967	381.427	441.668	442.335	171.212	161.285	163.834	156.903
ENSDARG00000058479	zgc:110425	1.73894	1.6583e-89	0.827072	1.14644e-20	305.974	289.923	348.351	320.902	1031.55	1192.43	944.897	1074.51	540.951	590.049	571.613	553.174
ENSDARG00000076223	SERP1 (1 of many)	1.28563	1.73418e-89	0.417432	3.18892e-10	493.768	427.256	493.779	516.284	1206.53	1105.57	1214.59	1196.15	644.211	637.157	682.038	623.962
ENSDARG00000100261	NA	-2.87669	1.87484e-89	-3.22258	1.71863e-110	437.106	437.937	405.846	394.318	62.6569	64.2006	51.7885	47.9197	53.9618	37.5268	33.9215	52.5442
ENSDARG00000043542	zpr1	1.98995	2.14092e-89	1.8486	5.64603e-78	144.083	151.065	131.9	138.544	605.938	494.722	557.948	575.957	532.956	489.445	490.057	515.225
ENSDARG00000015889	zc3h15	1.58629	2.15902e-89	0.78118	2.31158e-22	783.553	721.757	678.664	665.486	2128.8	1820.27	2322.67	2265.13	1209.14	1236.79	1215.4	1223.84
ENSDARG00000003655	tmem59l	5.38909	2.21797e-89	3.53243	3.58089e-38	14.5702	6.10365	11.2735	13.0255	512.716	393.7	485.64	529.881	133.239	132.541	141.46	123.333
ENSDARG00000007923	ptpn1	2.03719	2.27637e-89	2.20894	3.06177e-106	215.315	225.835	240.125	204.856	900.119	750.58	965.417	1027.51	1017.95	1036.38	1037.85	1012.21
ENSDARG00000063219	NA	-2.19072	2.54763e-89	-0.917759	2.07882e-18	1414.93	1304.66	1149.9	1158.09	246.043	348.382	258.943	246.971	703.502	633.165	669.769	649.505
ENSDARG00000000935	unk	-6.2111	2.76408e-89	-4.00693	8.06181e-105	521.29	498.973	388.935	422.737	3.05643	14.1619	2.93143	4.60766	30.645	31.1393	28.1476	23.353
ENSDARG00000063300	NA	-4.55986	2.79117e-89	-1.80523	2.70929e-19	822.407	849.933	807.182	759.033	19.1027	64.2006	31.2686	23.0383	209.185	243.525	223.737	248.125
ENSDARG00000078859	g0s2	5.51713	3.66633e-89	6.12167	4.30828e-110	8.09456	7.62956	12.4008	8.28897	435.542	439.963	436.783	428.512	649.54	667.498	653.169	677.236
ENSDARG00000101127	map1lc3b	1.23032	3.81176e-89	1.91748	4.8491e-218	1735.47	1644.93	1608.73	1578.46	3885.49	3350.7	4109.86	4049.21	6140.32	6178.35	6248.05	6223.57
ENSDARG00000098972	mrps16	2.59881	3.96912e-89	1.49195	1.05905e-28	38.8539	62.5624	72.1503	65.1276	366.008	368.209	382.063	364.927	181.871	176.456	163.112	165.66
ENSDARG00000071506	mgat5	2.66104	4.04096e-89	1.03078	4.91614e-14	191.032	155.643	162.338	156.306	1092.67	786.457	1174.53	1147.31	324.437	361.694	342.102	328.401
ENSDARG00000017217	igsf11	4.85842	4.20737e-89	-0.357081	0.267329	11.3324	25.9405	18.0376	18.9462	563.912	432.41	624.394	556.605	11.3253	15.9688	20.2085	10.9467
ENSDARG00000069116	timm10	2.39861	5.89748e-89	1.10593	9.82897e-19	105.229	97.6584	81.1691	69.8642	481.388	422.024	465.12	467.217	189.199	183.642	203.529	172.958
ENSDARG00000027825	naa50	1.59228	6.53049e-89	1.40473	6.45251e-70	265.502	273.138	306.639	262.879	803.842	821.389	829.594	900.337	706.833	766.505	784.524	688.183
ENSDARG00000052103	dtymk	2.16776	7.92941e-89	0.175851	0.16387	161.891	114.443	131.9	126.703	591.42	554.202	613.645	634.935	165.216	158.89	143.625	133.55
ENSDARG00000087193	prrg2	3.60079	8.46275e-89	1.44963	2.44405e-14	30.7593	27.4664	41.7119	33.1559	438.598	337.997	426.034	443.257	95.2659	83.038	93.8254	97.7906
ENSDARG00000031382	reep2	-3.19311	9.0043e-89	-4.57617	9.00862e-126	422.536	454.722	385.553	433.395	46.6106	62.3123	36.1543	39.6259	13.9901	24.7517	14.4347	18.2445
ENSDARG00000055561	c1galt1b	-2.90383	1.34218e-88	0.0282913	0.875357	615.186	613.417	494.906	460.63	61.1286	95.3567	78.1714	57.135	534.289	548.53	591.1	546.606
ENSDARG00000014634	mbtps1	-2.02806	1.37049e-88	-0.778707	3.40357e-18	498.625	566.114	498.288	510.364	123.785	111.407	156.343	117.035	323.105	290.633	287.972	304.318
ENSDARG00000040251	ctsk	-4.08247	1.47389e-88	-0.516088	0.000480065	383.682	393.685	330.313	296.035	22.9232	33.9885	15.6343	9.21532	241.829	242.726	230.233	263.451
ENSDARG00000056797	ppp2r2ca	-7.91439	1.69866e-88	-10.2992	1.38395e-42	877.45	999.473	748.56	696.274	1.52822	8.49713	0.977142	2.7646	0	0.798442	0	1.45956
ENSDARG00000042821	agps	3.78732	1.8755e-88	-0.43886	0.0493538	56.6619	65.6142	63.1315	43.8131	786.267	574.973	913.628	891.121	49.2984	34.333	40.4171	43.7868
ENSDARG00000069548	zgc:162780	-6.40695	2.16622e-88	-1.88641	4.9543e-77	407.966	390.634	431.775	402.607	1.52822	14.1619	1.95428	1.84306	109.922	108.588	111.147	112.386
ENSDARG00000074146	zgc:113452	2.66425	3.02182e-88	1.10024	1.74779e-15	105.229	115.969	137.537	117.23	787.795	591.023	832.525	829.379	255.819	272.269	241.059	259.072
ENSDARG00000036175	pcdh1b	-4.97737	3.14118e-88	-3.02458	7.25623e-47	762.507	712.601	532.109	525.758	19.8668	35.8768	10.7486	12.9014	91.9349	75.0536	71.4516	70.7887
ENSDARG00000104419	NA	-3.53696	3.17738e-88	-10.2049	9.38962e-34	723.654	640.883	510.689	542.335	43.5542	67.9771	44.9485	51.6058	0	0.798442	0	0.729781
ENSDARG00000071426	lrrc59	1.32925	3.23327e-88	0.52098	2.15881e-14	799.742	825.519	731.649	672.591	1822.4	1791.95	1908.36	2063.31	1058.58	1107.44	1082.6	1082.99
ENSDARG00000013434	hira	2.408	3.48422e-88	1.804	1.45789e-49	158.653	122.073	142.046	134.992	755.703	609.905	804.188	789.753	462.34	446.329	499.44	538.578
ENSDARG00000026369	dbi	1.65385	3.83511e-88	1.06904	3.90086e-37	466.247	398.263	335.95	323.27	1202.71	1147.11	1192.11	1207.21	781.447	813.613	792.464	779.406
ENSDARG00000097150	NA	-4.82989	4.02992e-88	-2.59716	9.6663e-45	522.908	485.24	414.864	354.057	12.9898	23.6031	7.81714	17.5091	88.604	73.4567	72.1734	57.6527
ENSDARG00000054030	hoxb5b	7.92652	4.24658e-88	-1.79741	0.0077653	6.47565	6.10365	3.38205	3.55242	1140.81	954.511	1272.24	1288.3	0.666195	2.39533	0.721734	1.45956
ENSDARG00000001414	mctp2a	6.15904	4.31905e-88	1.73752	1.6274e-07	9.71347	10.6814	10.1461	8.28897	693.81	506.051	817.868	793.439	36.6407	34.333	26.7041	32.8401
ENSDARG00000074589	rin2	-1.50478	4.97291e-88	-0.108986	0.148534	1128.38	1138.33	1003.34	995.861	427.9	343.662	365.451	357.554	977.308	984.479	1020.53	963.31
ENSDARG00000015356	fcho1	-4.21428	4.99422e-88	-1.31013	2.40561e-21	344.828	332.649	253.653	264.063	12.9898	20.7708	16.6114	13.823	113.919	120.565	114.034	130.631
ENSDARG00000055635	crk	1.0427	7.47598e-88	0.787442	8.65027e-51	943.826	976.584	984.176	997.045	2040.17	1879.75	2180.98	1947.2	1725.45	1661.56	1672.98	1681.41
ENSDARG00000101733	fam168b	1.63968	7.91817e-88	1.31591	6.06063e-57	244.456	288.398	291.983	252.222	849.688	765.686	917.537	832.143	664.197	674.684	708.021	641.477
ENSDARG00000025948	mlh1	4.33023	7.95256e-88	0.696978	0.00553248	9.71347	15.2591	24.8017	22.4986	367.536	346.494	407.468	406.396	27.314	31.1393	28.8693	35.7592
ENSDARG00000104375	sec24a	-4.64203	7.99397e-88	-0.637333	0.000809936	505.1	621.046	544.509	511.548	12.9898	43.4298	11.7257	19.3522	331.099	320.175	393.345	356.863
ENSDARG00000060469	pik3r4	-1.90858	8.05942e-88	-1.26208	8.1594e-46	644.327	683.609	543.382	600.358	172.688	154.837	158.297	168.64	234.501	259.494	274.259	259.072
ENSDARG00000034273	sid4	1.74783	8.26632e-88	0.107731	0.27928	723.654	749.223	918.789	931.917	2696.54	2513.26	3034.03	2964.57	875.381	903.038	878.35	937.768
ENSDARG00000077038	pbrm1l	-1.14653	8.99316e-88	-2.39091	0	1945.93	1820.41	1712.44	1867.39	881.017	782.68	847.182	799.89	353.083	338.54	337.771	368.539
ENSDARG00000017023	ak7b	-3.10505	9.73361e-88	-0.505809	8.38154e-06	262.264	285.346	298.747	312.613	35.9131	37.765	27.36	33.1751	213.182	233.145	184.764	188.283
ENSDARG00000024325	col4a3bpa	-2.24453	1.01078e-87	-0.699441	3.13156e-13	454.914	469.981	393.445	406.16	94.7494	99.1332	68.4	98.6039	254.487	261.889	279.311	261.991
ENSDARG00000031774	pus7	4.14728	1.03063e-87	-0.15736	0.583206	29.1404	21.3628	31.5658	29.6035	486.737	405.974	539.383	575.957	21.3182	27.9455	20.2085	32.1103
ENSDARG00000035868	spire1a	-3.69282	1.05651e-87	-2.28228	2.39167e-61	305.974	268.561	260.418	249.853	18.3386	14.1619	29.3143	22.1168	57.2928	51.1003	56.2952	56.9229
ENSDARG00000027200	gabarapl2	5.05253	1.42525e-87	4.31522	8.8862e-64	8.09456	6.10365	18.0376	10.6572	380.526	388.98	375.223	375.985	224.508	230.75	229.511	227.692
ENSDARG00000101707	NA	-5.57832	1.55055e-87	-9.82406	6.21888e-30	518.052	500.499	394.572	359.978	6.87697	15.106	7.81714	7.37226	0	0.798442	0	0.729781
ENSDARG00000053656	lypla2	-1.17477	1.62591e-87	-0.303252	1.18211e-07	1994.5	1812.78	1759.79	1680.29	842.811	815.725	763.148	778.694	1439.65	1533.81	1470.17	1419.42
ENSDARG00000039757	mcfd2	-4.47402	1.68622e-87	-2.49985	1.13105e-43	500.244	508.129	386.681	389.582	19.1027	26.4355	13.68	20.2737	67.9519	107.79	71.4516	67.8696
ENSDARG00000006124	kdm5c	-1.12747	1.78646e-87	-0.120332	0.0279164	1240.09	1249.72	1110.44	1133.22	527.235	573.084	521.794	538.175	1077.24	1123.41	1065.28	1075.7
ENSDARG00000004713	mad2l1	1.25458	2.18547e-87	0.149415	0.0275805	1031.25	956.747	935.7	878.631	2382.49	2029.87	2324.62	2312.12	1051.26	1090.67	1045.79	1020.23
ENSDARG00000014522	cdh6	-0.80329	2.59096e-87	0.221699	3.35452e-08	6661.82	6630.09	5947.89	6097.13	3634.1	3535.75	3760.04	3573.7	7378.11	7354.45	7421.59	7359.84
ENSDARG00000039719	mrps26	-1.43955	2.77428e-87	-0.83339	6.01696e-36	731.748	656.142	659.499	647.724	242.986	255.858	264.806	228.54	391.723	372.074	368.806	375.107
ENSDARG00000002644	rgs5a	2.61013	3.35762e-87	4.13208	2.20115e-230	38.8539	59.5106	55.2401	53.2862	342.32	330.444	307.8	294.89	894.034	934.178	906.497	937.038
ENSDARG00000093642	NA	-6.67872	3.41713e-87	-2.84384	3.16546e-96	550.43	444.041	448.685	445.236	2.29232	10.3854	2.93143	2.7646	71.2829	72.6583	57.7387	60.5718
ENSDARG00000036704	tmem18	2.28271	3.43191e-87	-1.48086	3.53151e-28	229.885	183.11	211.942	220.25	1088.09	860.099	1126.65	1043.17	84.6068	83.8364	65.6778	68.5994
ENSDARG00000033179	tmem243b	-3.6764	3.47658e-87	-4.48189	9.02957e-102	259.026	283.82	266.054	268.799	20.6309	26.4355	19.5428	17.5091	13.3239	15.9688	7.21734	11.6765
ENSDARG00000038793	ccdc24	-3.49028	3.50594e-87	-2.10374	1.62313e-58	265.502	238.042	252.526	271.168	22.9232	26.4355	23.4514	18.4306	62.6224	65.4723	60.6256	50.3549
ENSDARG00000098605	NA	-2.53085	3.509e-87	-0.964688	1.68651e-18	488.911	456.248	409.228	420.369	74.1185	101.966	63.5143	66.3503	218.512	245.92	227.346	215.285
ENSDARG00000022698	lad1	4.36477	4.32193e-87	6.28411	2.63196e-183	11.3324	10.6814	14.6555	22.4986	304.879	313.45	340.046	318.85	1196.49	1157.74	1244.99	1223.11
ENSDARG00000011597	atxn2l	-1.14041	4.73701e-87	-0.766604	1.72368e-44	1131.62	1116.97	1151.02	1148.61	480.624	572.14	526.68	489.333	667.528	671.49	654.612	681.615
ENSDARG00000032708	arl4cb	2.18398	5.20726e-87	1.28424	1.10694e-29	101.991	111.392	101.461	82.8897	463.049	448.46	447.531	435.885	265.812	231.548	242.503	221.124
ENSDARG00000017841	cand1	-1.90629	5.79326e-87	-0.567121	8.61283e-11	673.467	646.987	680.919	615.752	150.529	208.652	150.48	189.836	420.369	451.918	459.023	434.949
ENSDARG00000098029	NA	6.30256	6.24486e-87	0.647823	0.0944003	3.23782	0	16.9102	8.28897	673.179	538.152	688.885	642.308	9.99293	13.5735	15.1564	11.6765
ENSDARG00000045172	minpp1b	-5.0793	6.46221e-87	-4.35102	3.82504e-104	330.258	335.701	289.729	296.035	11.4616	14.1619	8.79428	1.84306	15.9887	11.9766	18.0433	14.5956
ENSDARG00000012656	atf6	-2.83335	7.24722e-87	-0.0413897	0.823028	2086.78	1852.46	1775.57	1801.07	214.714	377.65	256.011	205.502	1848.03	1860.37	1811.55	1780.66
ENSDARG00000078572	NA	-1.48996	7.40573e-87	-2.04906	4.29111e-155	971.347	830.097	869.186	865.605	297.238	332.332	323.434	305.949	207.853	203.603	204.972	236.449
ENSDARG00000104609	crebbpa	-4.22918	7.60019e-87	-1.69664	2.97667e-31	312.45	317.39	308.894	283.009	11.4616	25.4914	20.52	8.29379	109.922	99.0068	86.608	80.2759
ENSDARG00000059437	fktn	-3.28384	7.74297e-87	-2.30884	4.74128e-50	929.255	795.001	639.207	582.596	68.7697	92.5243	61.56	78.3302	148.562	152.502	132.799	158.362
ENSDARG00000028949	ZBTB26	-6.33175	7.77862e-87	-0.372962	3.71221e-05	419.298	411.996	365.261	367.083	0.764108	15.106	1.95428	1.84306	296.457	304.207	304.572	297.021
ENSDARG00000087657	fasn	-2.38434	7.89405e-87	0.0664196	0.618656	1316.18	1193.26	953.737	1038.49	224.648	254.914	212.04	167.719	1108.55	1195.27	1181.48	1220.19
ENSDARG00000031261	sap30bp	1.65335	8.13613e-87	0.0573683	0.572144	858.023	918.599	693.32	744.823	2520.03	2264.01	2673.46	2621.76	876.713	808.822	829.994	816.624
ENSDARG00000036076	heatr3	-3.10322	9.69991e-87	-5.69817	4.16254e-95	333.496	325.019	293.111	277.088	32.8566	36.8209	35.1771	37.7828	5.32956	7.18598	5.05214	5.83824
ENSDARG00000068629	cd151l	-4.44771	1.00543e-86	0.325497	0.00207531	257.407	238.042	261.545	227.355	12.2257	20.7708	3.90857	7.37226	318.441	319.377	283.641	311.616
ENSDARG00000093622	spc24	1.21568	1.10716e-86	0.20886	0.00152179	451.676	460.826	436.284	436.947	1030.78	996.053	1068.99	1044.1	493.651	549.328	487.892	531.28
ENSDARG00000067831	NA	-7.12666	1.13538e-86	-1.57754	1.34465e-69	509.957	531.018	549.019	486.681	0	12.2736	0.977142	1.84306	181.871	170.068	168.886	174.418
ENSDARG00000074121	dnmbp	-2.61466	1.37565e-86	-0.038867	0.79584	663.754	663.772	491.524	517.469	97.0417	115.183	83.0571	83.8594	550.943	604.421	572.335	538.578
ENSDARG00000012519	hcfc1b	1.56627	1.41341e-86	-0.299364	0.000513685	380.444	407.419	438.539	473.655	1282.94	1124.45	1343.57	1309.5	361.078	349.718	341.38	335.699
ENSDARG00000015966	yaf2	1.43792	1.75229e-86	0.64627	2.76544e-18	890.401	938.436	829.729	940.206	2493.28	2112.95	2695.94	2442.98	1444.31	1390.89	1402.33	1390.96
ENSDARG00000075743	mrpl47	3.13204	1.75229e-86	-1.12353	1.45354e-08	40.4728	45.7774	76.6597	69.8642	499.727	505.107	527.657	567.664	32.6436	28.7439	20.2085	27.7317
ENSDARG00000009871	snrpc	0.715923	1.90378e-86	-0.214497	1.73609e-08	1785.66	1724.28	1810.52	1772.66	2913.54	2986.27	2868.89	2890.85	1499.61	1576.13	1472.34	1572.68
ENSDARG00000019976	idi1	-2.16334	2.4728e-86	-1.34726	4.62533e-40	689.656	700.394	526.472	624.041	147.473	153.893	128.006	134.544	257.818	235.54	261.268	239.368
ENSDARG00000067975	atpif1a	1.08617	2.51747e-86	0.0225913	0.753781	657.278	656.142	742.923	764.954	1506.06	1546.48	1474.51	1496.57	701.504	701.831	726.064	752.404
ENSDARG00000043148	slc1a3b	-2.11477	3.73513e-86	-4.91591	8.93022e-292	1607.58	1547.28	1294.2	1248.08	314.812	350.271	324.411	323.458	54.628	50.3019	49.7996	32.8401
ENSDARG00000058114	impad1	2.27455	4.40329e-86	2.32054	3.53184e-91	79.3267	88.5029	77.7871	86.4421	392.752	379.539	425.057	410.082	417.038	442.337	376.745	423.273
ENSDARG00000019564	asap2b	-1.93825	5.59882e-86	-1.74604	2.17672e-74	1003.73	927.755	847.766	815.872	228.468	220.925	266.76	220.246	271.141	287.439	280.033	230.611
ENSDARG00000053106	cep44	-3.28435	5.81625e-86	-1.24144	5.23553e-22	359.398	331.123	299.875	281.825	30.5643	40.5974	27.36	31.3321	132.573	144.518	147.234	111.656
ENSDARG00000054842	hsd17b14	1.47527	6.4595e-86	0.0285322	0.777219	411.204	346.382	399.081	322.086	1052.18	1020.6	1064.11	966.687	384.395	372.873	358.702	388.973
ENSDARG00000010301	b4galt6	-1.29664	7.05709e-86	-2.43724	1.13556e-265	1662.62	1629.67	1562.51	1611.61	668.595	715.647	659.571	586.094	318.441	315.385	284.363	274.397
ENSDARG00000041689	usf1	-1.646	8.23432e-86	-0.613649	1.24822e-15	632.994	718.705	751.942	740.087	229.997	243.584	244.286	193.522	469.001	443.934	474.179	475.817
ENSDARG00000079508	NA	4.34348	8.66844e-86	1.98384	1.46742e-17	11.3324	12.2073	30.4384	11.8414	350.726	338.941	356.657	363.084	74.6139	73.4567	66.3995	59.842
ENSDARG00000005540	xpo7	-3.8383	8.93804e-86	-1.08516	5.42725e-13	341.59	381.478	425.01	322.086	19.8668	44.3739	20.52	18.4306	184.536	169.27	166.72	172.228
ENSDARG00000063126	gusb	-4.95998	1.10413e-85	-3.73618	2.02772e-95	294.642	306.708	287.474	317.349	10.6975	17.9384	5.86285	3.68613	16.6549	24.7517	24.5389	24.8125
ENSDARG00000004372	fmnl3	-7.06986	1.69463e-85	-6.47509	7.67628e-123	553.668	560.01	475.741	506.811	2.29232	9.44126	1.95428	1.84306	4.66337	7.98442	5.77387	5.10846
ENSDARG00000039456	acbd6	3.00039	1.76951e-85	-0.638293	0.000213543	101.991	102.236	107.098	129.071	906.232	651.447	1010.37	978.667	70.6167	73.4567	71.4516	68.5994
ENSDARG00000038703	hkdc1	6.31624	1.93887e-85	8.14103	7.67609e-142	9.71347	6.10365	7.89144	3.55242	568.496	480.56	578.468	566.742	1929.3	1972.95	1946.52	1931
ENSDARG00000079313	NA	-1.61817	1.97848e-85	0.037988	0.665931	728.51	724.809	697.829	644.171	220.063	258.69	205.2	224.854	735.48	750.536	657.499	721.023
ENSDARG00000099663	cox5ab	1.63559	2.03355e-85	1.80616	3.14752e-106	218.553	222.783	296.493	300.771	793.908	794.01	829.594	856.103	947.996	900.643	919.489	914.415
ENSDARG00000068851	rnf183	4.67976	2.5687e-85	-3.88961	1.50221e-10	16.1891	28.9923	13.5282	14.2097	460.757	383.315	509.091	472.746	0.666195	0.798442	0	2.91912
ENSDARG00000026185	ccdc94	-1.9214	2.95986e-85	0.0785156	0.397828	514.814	445.567	466.722	477.208	112.324	135.01	142.663	114.27	518.3	538.15	485.727	467.06
ENSDARG00000015460	racgap1	-2.275	3.17402e-85	-2.6262	7.30248e-112	543.954	601.21	554.656	458.262	106.211	111.407	111.394	116.113	85.9392	102.999	78.669	81.7354
ENSDARG00000079605	prmt5	-3.68988	3.55538e-85	-0.242766	0.125152	395.014	373.849	457.704	373.004	29.0361	53.8152	21.4971	19.3522	349.086	328.16	351.484	324.023
ENSDARG00000012747	rer1	1.03301	3.67374e-85	0.102452	0.0723921	1682.05	1603.73	1581.67	1696.87	3372.77	3066.52	3590.02	3401.37	1704.79	1817.25	1798.56	1726.66
ENSDARG00000071878	trmt112	1.80805	4.30827e-85	1.09292	8.69541e-31	139.226	132.754	148.81	123.15	463.814	477.728	496.388	470.903	297.123	278.656	285.085	299.94
ENSDARG00000078748	NA	-1.04759	4.42003e-85	-0.984163	9.55051e-79	1581.68	1632.73	1698.91	1738.32	860.386	794.01	803.211	761.185	841.405	819.202	817.002	889.602
ENSDARG00000099101	gch2	2.64795	4.42003e-85	4.68786	7.67784e-282	45.3295	51.881	63.1315	41.4449	333.151	312.506	343.954	288.439	1256.44	1354.96	1356.14	1293.17
ENSDARG00000101438	lonp2	3.10109	4.48597e-85	2.89887	9.43866e-75	25.9026	41.1996	41.7119	35.5242	321.689	308.729	335.16	293.047	281.134	292.23	256.215	264.91
ENSDARG00000071673	ctdspla	2.33615	5.34284e-85	0.00461456	1	220.172	158.695	149.937	195.383	893.242	789.289	974.211	986.039	162.552	194.021	180.433	186.824
ENSDARG00000018853	si:dkey-199f5.8	1.90893	6.40546e-85	0.964914	4.28555e-22	231.504	283.82	278.455	259.326	1052.94	910.137	1028.93	973.138	559.604	554.917	506.657	440.058
ENSDARG00000053716		2.4216	6.85323e-85	2.25705	3.91401e-74	148.94	125.125	161.211	148.017	809.954	646.726	932.194	753.813	760.129	685.862	688.534	668.479
ENSDARG00000045027	rab9a	-2.45176	6.9601e-85	-0.0119966	0.960761	508.338	518.81	391.19	401.423	84.0519	89.692	75.24	81.0948	455.678	432.756	481.396	424.732
ENSDARG00000003757	cnpy1	-1.63684	7.65266e-85	0.256726	0.000410075	582.808	541.699	597.495	543.52	178.801	216.205	169.046	164.954	646.209	689.854	683.482	689.643
ENSDARG00000058416		-7.9364	1.05007e-84	-4.97266	3.07925e-184	854.785	724.809	739.541	658.381	0.764108	9.44126	0.977142	0.921532	26.6478	27.9455	20.2085	19.7041
ENSDARG00000021808	nmt2	-4.98347	1.28677e-84	-3.11215	2.01631e-50	524.527	607.313	514.071	440.5	17.5745	27.3796	15.6343	4.60766	59.9576	66.2707	44.0258	70.0589
ENSDARG00000044062	ctbp2a	3.40419	1.39478e-84	2.01052	5.42333e-29	38.8539	19.8369	41.7119	31.9717	401.921	324.779	357.634	338.202	135.238	142.921	140.016	124.063
ENSDARG00000057437	apodb	4.42054	1.57037e-84	2.34046	3.3475e-23	12.9513	18.311	18.0376	13.0255	336.972	319.115	366.428	328.065	84.6068	75.0536	82.2776	76.627
ENSDARG00000034497	fbxl14a	-1.16146	1.79172e-84	-0.760009	3.46921e-41	1100.86	1121.55	1047.31	1017.18	472.219	521.157	462.188	457.08	648.208	603.622	641.621	630.53
ENSDARG00000044852	NA	2.26291	2.10179e-84	2.01968	1.14928e-67	77.7078	82.3993	103.716	113.677	489.029	419.192	480.754	454.315	360.412	396.826	388.293	413.786
ENSDARG00000104835	map3k4	-3.19612	2.15257e-84	0.172816	0.281329	738.224	692.764	589.603	549.44	48.9029	103.854	65.4685	62.6642	697.506	707.42	740.499	746.566
ENSDARG00000104611	zgc:173517	2.74442	2.30652e-84	0.380125	0.014283	106.848	102.236	108.225	91.1787	639.558	565.531	746.537	786.988	139.235	130.945	114.034	146.686
ENSDARG00000011885	mrpl19	-2.17482	2.52399e-84	-1.6776	3.98497e-58	637.851	537.121	543.382	503.259	133.719	106.686	130.937	117.956	182.538	189.231	155.173	165.66
ENSDARG00000013946	ivns1abpb	1.45414	2.65199e-84	-0.785941	4.5102e-22	589.284	553.906	490.397	460.63	1390.68	1419.02	1491.12	1406.26	318.441	291.431	319.006	277.317
ENSDARG00000006307	shisa4	-5.37105	2.78184e-84	-10.843	1.28948e-28	419.298	390.634	341.587	306.692	5.34876	14.1619	7.81714	8.29379	0	0	0	0
ENSDARG00000063646	lnpa	-3.30759	2.82647e-84	-2.06546	9.64708e-52	328.639	315.864	273.946	265.247	31.3284	32.1003	22.4743	32.2536	60.6238	66.2707	75.782	78.8163
ENSDARG00000099195	ier2	1.36589	2.90684e-84	-0.363053	6.94655e-07	1291.89	1362.64	1184.84	1210.19	3210.02	2844.65	3476.67	3465.88	959.987	1001.25	955.575	1003.45
ENSDARG00000054473	tinf2	-4.56831	3.20063e-84	-3.82441	3.76958e-78	450.057	460.826	361.879	429.842	21.395	30.212	7.81714	11.0584	24.6492	33.5346	33.1997	28.4614
ENSDARG00000060847	setd1ba	-2.44504	3.32125e-84	-3.51355	4.75182e-136	435.487	427.256	438.539	386.029	84.0519	75.5301	67.4228	81.0948	45.3013	42.3174	31.0345	28.4614
ENSDARG00000077911	treh	-7.56287	3.36869e-84	-5.32591	1.96471e-150	705.846	743.12	594.113	595.622	0	8.49713	2.93143	2.7646	11.9915	11.9766	22.3737	18.9743
ENSDARG00000004692	nabp1a	-2.9772	3.38258e-84	0.0861297	0.552269	417.679	459.3	390.063	335.111	39.7336	65.1447	60.5828	38.7043	408.378	403.213	429.432	454.653
ENSDARG00000042995	sptlc1	-1.57664	4.17043e-84	-1.39485	4.22741e-68	2196.86	2241.57	1845.47	1811.73	697.631	610.849	728.948	670.875	789.441	750.536	753.49	778.676
ENSDARG00000079686	naa30	-6.61738	4.4613e-84	-1.35697	2.52447e-06	1413.31	1358.06	1172.44	1076.38	7.64108	29.2679	6.84	6.45072	451.68	508.608	487.17	505.008
ENSDARG00000087229	exoc7	6.89483	5.03341e-84	5.47732	3.50456e-53	6.47565	7.62956	5.63674	4.73655	739.657	567.42	822.754	827.536	285.132	293.028	262.711	265.64
ENSDARG00000022350	nek1	-4.72663	5.73795e-84	-4.38898	3.37135e-87	467.865	468.455	374.28	445.236	11.4616	24.5473	18.5657	11.9799	10.6591	20.7595	26.7041	25.5423
ENSDARG00000030087	NA	2.15797	6.03736e-84	0.93812	2.38442e-16	212.077	172.428	202.923	165.779	874.904	747.748	891.154	844.123	409.044	373.671	344.989	313.076
ENSDARG00000014763	arf2a	-0.972471	6.11521e-84	-0.551068	6.13876e-30	2086.78	1966.9	1930.02	1985.8	989.52	1019.66	1029.91	1020.14	1382.36	1404.46	1404.49	1242.82
ENSDARG00000087392	NA	-2.5895	6.27046e-84	-5.27662	4.84533e-218	1312.94	1289.4	1027.01	998.229	166.576	169.943	213.994	217.482	25.3154	32.7361	25.9824	35.0295
ENSDARG00000052247	NA	4.37194	6.56337e-84	3.6589	1.32049e-58	9.71347	9.15548	19.1649	22.4986	327.038	328.556	315.617	359.397	217.846	187.634	191.259	213.826
ENSDARG00000031293	dnajc9	3.53902	7.34918e-84	-0.383401	0.103525	24.2837	27.4664	32.6931	35.5242	356.838	323.835	345.908	396.259	23.3168	19.1626	24.5389	26.2721
ENSDARG00000019205	fam120c	-2.797	1.00314e-83	-1.37403	2.85604e-31	312.45	381.478	316.785	296.035	42.79	51.9269	54.72	38.7043	118.583	122.162	137.851	124.063
ENSDARG00000009046	nphp1	-7.30993	1.04553e-83	-2.03629	2.01603e-73	590.903	590.528	562.547	478.392	1.52822	10.3854	0	1.84306	129.908	145.317	124.86	140.848
ENSDARG00000011000	gtf2a1	-1.88399	1.0615e-83	-1.92336	4.98439e-93	469.484	508.129	449.812	479.576	118.437	148.228	124.097	126.25	134.571	115.774	121.251	129.171
ENSDARG00000078105	depdc5	-4.20954	1.09589e-83	-1.20391	2.8209e-16	354.542	309.76	305.512	239.196	10.6975	25.4914	16.6114	12.9014	139.235	126.154	131.356	125.522
ENSDARG00000074168	fam208b	1.91104	1.39864e-83	-0.904385	3.26511e-17	390.158	384.53	370.898	369.451	1498.42	1226.42	1558.54	1409.94	232.502	183.642	176.825	213.826
ENSDARG00000003693	hars	2.12689	2.15435e-83	1.65354	1.0427e-50	293.023	254.827	288.601	300.771	1260.78	980.003	1365.07	1373.08	872.05	955.735	854.533	904.198
ENSDARG00000004256	wnt11	-1.47696	2.21161e-83	-0.969512	8.85526e-38	3506.56	3373.79	2888.27	2954.43	1074.34	1297.23	1116.87	1078.19	1570.22	1634.41	1652.77	1632.52
ENSDARG00000017917	her7	1.02172	2.25123e-83	1.28247	9.10317e-137	553.668	604.261	624.551	551.809	1175.96	1166.94	1230.22	1176.8	1385.69	1460.35	1403.05	1442.05
ENSDARG00000098550	NA	-6.27111	2.63848e-83	-1.18358	3.08496e-29	393.396	372.323	372.025	352.873	5.34876	9.44126	2.93143	0.921532	149.894	151.704	184.042	169.309
ENSDARG00000076913	eme1	-3.5718	2.84013e-83	-2.71955	3.92381e-64	395.014	392.16	394.572	298.403	35.149	40.5974	23.4514	23.9598	55.2942	46.3097	63.5126	58.3824
ENSDARG00000003153	cpsf5	1.07803	2.99535e-83	1.44872	3.83769e-158	458.152	465.403	491.524	458.262	989.52	995.109	1025.02	954.707	1233.79	1282.3	1296.96	1312.88
ENSDARG00000052178	eif2s1b	1.7031	3.3696e-83	-1.29081	6.80724e-37	338.353	340.279	305.512	288.93	1039.95	906.361	1079.74	1101.23	130.574	130.146	119.808	137.199
ENSDARG00000076836	gpx4b	0.888748	3.59164e-83	0.125207	0.00982663	1821.28	1826.52	1795.87	1776.21	3429.32	3036.31	3447.36	3446.53	1957.28	1972.95	1986.93	1953.62
ENSDARG00000060027	nom1	-2.45963	4.0358e-83	-0.123155	0.23218	315.688	312.812	264.927	278.273	58.8363	52.871	50.8114	47.9197	269.809	285.044	262.711	252.504
ENSDARG00000055857	dopey2	-2.24156	5.10061e-83	1.39594	7.27318e-69	284.928	288.398	311.148	275.904	68.0056	64.2006	57.6514	54.3704	737.478	735.365	763.594	822.463
ENSDARG00000101805	NA	-3.8997	6.15235e-83	-0.529398	6.91376e-06	268.739	216.68	224.342	230.907	19.1027	22.659	11.7257	8.29379	161.885	171.665	155.173	161.282
ENSDARG00000091931	gpatch4	-4.6923	6.211e-83	-1.84553	4.60704e-42	257.407	274.664	241.253	278.273	8.40519	20.7708	4.88571	6.45072	67.2857	72.6583	75.0603	77.3567
ENSDARG00000003829	galnt2	-2.98237	1.0578e-82	-2.62139	2.45931e-70	751.175	675.979	517.453	622.857	83.2878	95.3567	54.72	89.3886	111.255	103.798	97.434	102.899
ENSDARG00000020711	rrm2	1.44565	1.06071e-82	-0.471106	5.15991e-09	531.003	570.691	441.921	499.706	1373.1	1329.33	1453.01	1384.14	351.085	364.09	402.006	349.565
ENSDARG00000041340	mrpl51	2.9616	1.13022e-82	2.12484	4.12784e-42	32.3782	38.1478	45.094	55.6545	368.3	312.506	357.634	327.144	192.53	204.401	176.103	192.662
ENSDARG00000031494	NA	-1.46478	1.19305e-82	-2.22772	1.5954e-174	1058.77	1077.29	918.789	918.892	365.244	368.209	341.023	359.397	203.19	208.393	228.068	205.798
ENSDARG00000089791	slc25a32a	-3.17431	1.21404e-82	-2.36682	3.7865e-55	574.714	570.691	499.416	453.525	37.4413	80.2507	60.5828	55.2919	104.593	96.6115	98.8775	105.088
ENSDARG00000009136	tp53bp2a	-3.22589	1.31861e-82	0.411017	0.00650534	620.043	587.476	620.042	560.098	42.0259	99.1332	68.4	46.9981	794.771	817.605	773.698	788.893
ENSDARG00000070922	cnbpb	-0.958458	1.35717e-82	-0.0431651	0.405531	1327.51	1309.23	1244.59	1267.03	670.123	630.676	679.114	663.503	1204.48	1259.14	1221.17	1304.12
ENSDARG00000090637	myh6	-8.25633	1.62968e-82	-3.58429	6.08786e-105	968.109	1016.26	771.107	724.693	0.764108	9.44126	0.977142	0	86.6054	62.2785	69.2864	70.0589
ENSDARG00000054033	hoxb1b	1.8055	1.65181e-82	-2.1886	5.53177e-54	155.416	141.91	138.664	143.281	499.727	506.996	513.977	497.627	30.645	32.7361	33.9215	29.1912
ENSDARG00000026595	pafah1b1b	2.99041	1.78192e-82	4.2979	6.04309e-177	33.9971	35.096	33.8205	39.0766	304.879	263.411	274.577	290.283	703.502	724.986	713.073	670.668
ENSDARG00000102128	eps8	-4.09724	1.82113e-82	0.392969	0.000333805	241.218	219.731	220.96	229.723	10.6975	27.3796	6.84	8.29379	282.467	298.617	294.467	320.374
ENSDARG00000029911	casc3	-1.06676	2.42529e-82	-0.705821	3.2469e-39	1924.89	1921.12	1750.77	1790.42	902.412	787.401	918.514	910.474	1106.55	1137.78	1144.67	1132.62
ENSDARG00000012495	mphosph10	1.57549	2.56681e-82	1.35129	4.45745e-61	369.112	430.307	339.332	359.978	1081.21	992.276	1220.45	1156.52	971.979	940.565	961.349	934.119
ENSDARG00000007175	recql	-2.03629	3.28575e-82	0.136356	0.151703	501.863	460.826	382.171	460.63	98.5699	124.625	101.623	114.27	489.654	503.019	503.77	479.466
ENSDARG00000056138	sf3b1	0.936824	3.38896e-82	0.054075	0.331452	1630.24	1681.56	1706.81	1780.94	3386.53	2987.21	3321.31	3335.02	1825.38	1765.36	1720.61	1755.85
ENSDARG00000022968	fxr1	-1.02254	4.43134e-82	-2.53759	0	2578.93	2497.92	2395.62	2290.12	1227.16	1100.85	1221.43	1247.75	416.372	433.554	413.553	415.975
ENSDARG00000101024	nufip1	-2.09452	5.28261e-82	0.25834	0.00157457	296.261	309.76	293.111	301.955	68.0056	65.1447	80.1257	68.1934	359.079	376.066	355.815	345.186
ENSDARG00000103163	arid4b	1.4552	5.5052e-82	-0.0818507	0.356031	574.714	579.847	572.693	497.338	1504.53	1361.43	1638.67	1585.96	492.984	554.119	534.083	518.144
ENSDARG00000037410	med28	2.06943	5.94481e-82	1.74897	7.70113e-59	129.513	160.221	175.866	161.043	669.359	564.587	731.88	687.463	552.276	542.142	496.553	533.47
ENSDARG00000002060	brf2	5.19447	7.97299e-82	2.11959	1.17089e-13	3.23782	9.15548	10.1461	20.1304	440.126	390.868	423.103	415.611	54.628	46.3097	37.5302	59.1122
ENSDARG00000101651	NA	-4.39773	8.25482e-82	-2.71234	2.19411e-70	281.691	230.413	246.889	247.485	12.2257	12.2736	7.81714	14.7445	37.9731	35.1315	45.4692	34.2997
ENSDARG00000053127	helb	2.03917	8.70136e-82	-0.311008	0.00780774	310.831	251.776	273.946	260.51	1159.15	934.685	1229.25	1179.56	243.827	225.959	204.251	207.987
ENSDARG00000037760	uncx4.1	4.02383	8.79127e-82	-3.10313	5.67752e-17	35.6161	28.9923	34.9478	40.2607	570.789	430.521	620.485	674.561	1.99859	3.19377	6.4956	4.37868
ENSDARG00000056099	gtf2h5	1.33729	1.1422e-81	0.612105	1.09493e-17	390.158	437.937	455.449	474.84	1086.56	1030.99	1170.62	1179.56	654.87	663.506	692.864	690.372
ENSDARG00000010767	epha4l	-8.2264	1.15736e-81	-12.0395	3.79422e-35	895.258	935.385	744.05	722.325	0	7.55301	1.95428	1.84306	0	0	0	0
ENSDARG00000054264	cog4	-5.47692	1.78424e-81	-8.5468	7.80585e-37	320.545	323.494	284.092	312.613	9.9334	10.3854	1.95428	4.60766	1.99859	0	0	0.729781
ENSDARG00000098980	NA	-6.14884	2.25347e-81	-4.27741	4.33159e-95	464.628	468.455	355.115	403.791	2.29232	14.1619	1.95428	5.52919	20.6521	27.9455	17.3216	21.1636
ENSDARG00000021442	cdh11	-6.9719	2.2752e-81	0.163089	0.260362	548.811	604.261	412.61	434.579	1.52822	10.3854	1.95428	1.84306	536.287	591.646	548.518	555.363
ENSDARG00000059373	NA	-1.35665	2.43752e-81	0.285039	5.06883e-06	707.464	743.12	676.409	674.959	274.315	260.579	252.103	303.184	885.373	808.822	856.698	853.113
ENSDARG00000078935	ttll4	3.35645	2.55575e-81	-0.584427	0.00923029	24.2837	30.5183	34.9478	41.4449	371.356	314.394	351.771	336.359	24.6492	23.1548	23.0955	18.2445
ENSDARG00000034503	per2	3.36655	2.86687e-81	-4.48647	1.15357e-22	53.4241	41.1996	48.476	46.1814	516.537	391.812	544.268	500.392	1.33239	3.19377	2.88693	0.729781
ENSDARG00000102015	NA	-3.05446	3.11341e-81	-6.38276	2.29735e-79	299.499	347.908	289.729	307.876	35.9131	45.318	39.0857	29.489	3.33098	3.99221	2.88693	4.37868
ENSDARG00000026489	khsrp	-1.04627	3.20943e-81	-1.41572	8.36954e-147	3186.02	3266.98	3094.57	2911.8	1509.11	1655.05	1424.67	1438.51	1178.5	1144.17	1203.85	1138.46
ENSDARG00000087107	NA	-7.0552	4.43685e-81	-1.53196	3.82432e-36	555.287	515.759	474.614	441.684	0	12.2736	0.977142	1.84306	165.883	162.882	196.312	159.822
ENSDARG00000058232	NA	-7.89027	5.04843e-81	-8.69133	3.1852e-72	788.41	798.052	654.99	609.831	0.764108	6.60888	1.95428	2.7646	3.33098	0.798442	1.44347	0.729781
ENSDARG00000103145	cdk2ap2	1.42884	5.14619e-81	0.939499	1.77826e-35	430.631	492.87	555.783	576.676	1418.18	1315.17	1364.09	1475.37	1015.95	951.743	988.775	1012.94
ENSDARG00000077828	slc29a3	-3.67336	5.7256e-81	-2.04024	5.09164e-38	411.204	393.685	347.223	293.666	29.0361	42.4857	19.5428	21.1952	81.942	92.6193	84.4428	91.2226
ENSDARG00000034013	rgmd	-1.58468	6.82594e-81	-0.702623	6.70472e-20	799.742	773.638	682.046	661.933	233.817	244.529	264.806	226.697	451.68	439.143	466.24	427.651
ENSDARG00000070083	atp5b	1.24503	7.53027e-81	1.48902	1.90855e-116	1081.43	1182.58	1197.24	1205.45	2704.18	2446.23	2946.08	2983	3269.69	3182.59	3288.94	3378.15
ENSDARG00000075677	mrpl17	-2.47975	8.43308e-81	-3.71004	8.46186e-143	589.284	633.254	485.887	476.024	96.2776	102.91	97.7142	93.0747	37.9731	49.5034	36.8084	42.3273
ENSDARG00000021346	pdhb	1.01566	8.68766e-81	0.624404	4.52569e-31	565	578.321	553.528	580.228	1120.95	1176.38	1163.78	1143.62	920.016	843.155	855.976	886.683
ENSDARG00000002197	pygl	-5.17611	9.40848e-81	-8.49878	6.40298e-58	613.568	653.091	517.453	493.786	7.64108	29.2679	9.77142	16.5876	1.33239	1.59688	2.1652	0.729781
ENSDARG00000024598	homezb	-3.00844	1.53325e-80	0.0294917	0.846151	288.166	273.138	227.724	261.695	32.8566	44.3739	29.3143	23.0383	256.485	264.284	258.381	288.263
ENSDARG00000035352	pafah1b2	2.64886	1.70166e-80	-3.29084	2.96884e-39	76.0889	74.7697	93.57	89.9945	576.902	450.348	540.36	550.155	6.66195	7.98442	11.5477	8.02759
ENSDARG00000097048	NA	5.70716	1.75555e-80	0.130092	0.768247	14.5702	9.15548	6.76409	15.3938	621.22	483.392	641.005	657.974	19.9859	13.5735	10.826	5.10846
ENSDARG00000038222	tyw3	2.92828	1.86279e-80	3.5357	4.0695e-120	33.9971	35.096	32.6931	60.3911	314.048	285.126	340.046	318.85	505.642	460.701	488.614	460.492
ENSDARG00000091198	urm1	2.31013	1.87716e-80	1.85624	5.54239e-52	64.7565	85.4511	109.353	86.4421	413.382	417.304	494.434	424.826	317.775	321.772	310.345	326.212
ENSDARG00000054858	tp53bp2b	-2.50986	2.07455e-80	-3.11162	6.85525e-117	739.843	747.697	666.263	615.752	124.55	138.786	116.28	105.055	89.2702	85.4333	56.2952	88.3034
ENSDARG00000062651	zc3hc1	-1.50251	2.10092e-80	-0.366698	2.56233e-07	657.278	674.453	606.514	570.755	211.658	239.808	211.063	220.246	470.334	503.817	495.109	469.979
ENSDARG00000078546	cars2	-5.17555	2.47895e-80	-1.76418	2.15693e-23	438.725	415.048	290.856	298.403	11.4616	16.0501	5.86285	5.52919	105.925	114.177	95.2688	107.278
ENSDARG00000069521	vps29	1.45968	2.50469e-80	-0.274014	0.00114952	325.401	328.071	421.628	394.318	1025.43	979.058	1064.11	1010.92	313.778	300.214	314.676	297.021
ENSDARG00000020866	apoa4b.2	2.01841	2.5199e-80	4.40915	0	84.1834	96.1325	94.6973	123.15	378.998	388.98	446.554	421.14	2153.14	2060.78	2095.19	2254.29
ENSDARG00000034610	insb	-1.00701	2.54247e-80	-0.559147	1.24137e-28	1248.18	1264.98	1253.61	1272.95	589.127	655.223	649.8	618.348	850.731	841.558	819.889	908.577
ENSDARG00000040027	osbpl10	3.11345	2.68773e-80	4.48929	1.04959e-171	30.7593	35.096	27.0564	55.6545	301.059	369.153	337.114	299.498	839.406	868.705	789.577	890.332
ENSDARG00000025693	tmem9b	2.12595	2.88931e-80	0.927191	1.2944e-15	176.461	141.91	143.173	111.309	647.964	575.917	598.988	652.445	295.791	255.502	250.442	275.857
ENSDARG00000038312	rcl1	1.86231	2.90188e-80	1.25242	2.52381e-36	166.748	177.006	151.065	161.043	623.512	541.928	583.354	623.877	354.416	419.182	374.58	409.407
ENSDARG00000077085	zgc:110821	-5.07476	3.00312e-80	-0.527522	5.39811e-05	312.45	283.82	260.418	248.669	7.64108	13.2178	8.79428	2.7646	189.199	217.176	164.555	193.392
ENSDARG00000053194	pdzd11	1.83816	3.1422e-80	0.304123	0.00347063	284.928	247.198	204.05	249.853	868.791	796.842	951.737	885.592	302.453	282.649	329.832	293.372
ENSDARG00000058425	rab35b	-2.00389	3.54919e-80	0.418975	1.5448e-06	440.344	428.781	386.681	428.658	93.2212	122.736	122.143	82.9379	550.943	567.692	544.909	583.824
ENSDARG00000086764	mdc1	-2.4783	3.93893e-80	-1.98075	1.18903e-63	354.542	303.657	375.407	319.717	63.421	59.4799	63.5143	56.2134	75.2801	84.6349	90.9384	92.6821
ENSDARG00000006192	gatad2ab	-1.16119	4.59521e-80	0.828214	5.10758e-57	851.548	776.69	797.036	764.954	325.51	368.209	364.474	369.534	1370.36	1419.63	1418.93	1445.7
ENSDARG00000078751	TPP2	-1.63449	4.93918e-80	0.88233	3.62466e-42	395.014	393.685	369.77	383.661	119.965	125.569	123.12	127.171	689.512	736.962	704.412	706.428
ENSDARG00000009881	ier5	1.29127	5.09003e-80	0.0952546	0.218308	555.287	512.707	517.453	506.811	1325.73	1182.05	1282.01	1320.56	589.583	589.25	508.822	543.687
ENSDARG00000099749	ube2d2l	1.80233	5.83134e-80	1.99446	5.79316e-100	144.083	207.524	178.121	179.989	605.174	584.414	662.502	632.171	696.174	780.078	676.264	685.994
ENSDARG00000001244	srrm1	1.02915	6.06775e-80	0.0237325	0.731721	1321.03	1275.66	1423.84	1474.25	2792.05	2603.9	2867.91	2979.31	1393.68	1403.66	1408.1	1394.61
ENSDARG00000040401	slc25a20	2.49416	6.11095e-80	2.87112	5.98892e-109	46.9484	50.3551	60.8768	59.2069	298.766	306.841	313.663	327.144	416.372	392.035	385.406	422.543
ENSDARG00000097589	zgc:174574	2.81124	6.36345e-80	-0.718116	1.66385e-05	100.373	105.288	144.301	125.519	846.632	676.938	909.719	941.806	67.2857	89.4255	65.6778	70.0589
ENSDARG00000086789	bahd1	1.76138	7.28545e-80	0.365193	0.000257755	178.08	198.369	193.904	182.357	661.718	579.693	622.44	689.306	256.485	252.308	239.616	221.853
ENSDARG00000013476	arhgef39	3.47285	7.46668e-80	4.1847	3.79474e-118	19.4269	25.9405	32.6931	22.4986	303.351	270.02	265.783	301.341	448.349	442.337	478.509	502.089
ENSDARG00000059768	gpatch8	-2.95509	8.70611e-80	-1.88014	4.11906e-42	414.441	411.996	400.209	434.579	52.7235	78.3624	46.9028	35.9397	121.248	120.565	105.373	103.629
ENSDARG00000031434	rcor1	-1.70525	8.78489e-80	0.340086	1.45131e-05	598.997	552.38	540	548.256	152.822	181.272	200.314	153.896	712.829	740.954	721.734	654.613
ENSDARG00000060445	elp6	-2.39832	8.93743e-80	-0.147471	0.149354	293.023	314.338	266.054	281.825	54.2517	54.7593	48.8571	59.8996	247.825	269.874	242.503	279.506
ENSDARG00000013845	ttc14	5.56825	8.95743e-80	4.13596	5.00303e-44	4.85674	6.10365	19.1649	8.28897	498.198	386.147	519.84	573.193	184.536	159.688	207.138	180.256
ENSDARG00000036990	dctd	2.50715	9.1647e-80	-5.22398	1.28304e-34	84.1834	96.1325	78.9144	85.258	493.614	423.912	513.977	518.822	0.666195	2.39533	2.88693	2.91912
ENSDARG00000037283	plrg1	1.68589	9.27222e-80	0.640413	1.64554e-12	922.78	888.081	898.497	866.789	2819.56	2321.61	3208.94	3157.17	1367.7	1412.44	1386.45	1407.02
ENSDARG00000069560	kcnh3	-4.56495	9.43979e-80	-4.90541	2.58404e-90	339.971	338.753	276.2	281.825	13.7539	15.106	7.81714	14.7445	3.99717	11.9766	12.2695	13.1361
ENSDARG00000005462	kif4	-4.60997	1.04346e-79	-3.04107	4.99911e-57	425.774	343.33	369.77	304.324	8.40519	24.5473	11.7257	14.7445	47.2999	37.5268	36.0867	53.274
ENSDARG00000068453	NA	-4.33277	1.17884e-79	-10.1454	3.87318e-25	432.249	396.737	348.351	293.666	15.2822	25.4914	13.68	18.4306	0	0.798442	0	0
ENSDARG00000020101	psmc2	1.55576	1.35517e-79	-0.300793	0.000797373	395.014	350.96	391.19	374.188	1080.45	1032.87	1147.17	1187.85	346.422	280.253	284.363	314.535
ENSDARG00000002217	scocb	2.15417	1.37416e-79	2.3451	9.20304e-97	63.1376	68.6661	93.57	94.7311	359.131	364.433	383.04	353.868	427.031	398.423	430.153	409.407
ENSDARG00000032885	NA	-6.95657	1.45662e-79	-1.53006	4.69042e-26	571.476	552.38	440.793	407.344	0.764108	12.2736	0.977142	1.84306	159.887	176.456	170.329	173.688
ENSDARG00000075768	sdhb	2.27508	1.5763e-79	0.587831	2.97734e-06	184.556	202.946	210.814	223.802	1081.98	779.848	1076.81	1057.92	281.134	316.183	312.511	331.32
ENSDARG00000043640	cenpn	-2.90155	2.12024e-79	-6.59911	5.3386e-81	330.258	355.538	321.294	368.267	48.1388	58.5358	36.1543	40.5474	4.66337	4.79065	1.44347	2.91912
ENSDARG00000045676	calua	4.16341	2.55146e-79	2.45282	2.73729e-27	11.3324	16.785	33.8205	18.9462	385.11	311.562	408.445	418.375	111.255	106.193	125.582	121.873
ENSDARG00000060637	clstn2	-2.17309	2.64553e-79	-1.92576	2.97061e-69	539.098	532.544	519.708	462.998	111.56	136.898	112.371	93.9963	136.57	151.704	132.799	118.954
ENSDARG00000060645	sirt7	-2.98441	2.8693e-79	-5.71981	9.71089e-151	885.545	743.12	617.787	612.2	99.334	73.6418	94.7828	91.2317	17.3211	12.7751	9.38254	13.8658
ENSDARG00000069056	ranbp3b	3.5727	2.93568e-79	3.19954	1.18738e-63	17.808	25.9405	29.3111	23.6828	298.002	275.685	301.937	300.419	214.515	213.184	258.381	221.853
ENSDARG00000075825	NA	-6.83218	3.1743e-79	-2.36564	4.25682e-70	493.768	424.204	472.359	402.607	3.05643	11.3295	0.977142	0	72.6153	89.4255	90.9384	94.8715
ENSDARG00000020469	map3k7	-1.59747	3.62163e-79	-1.60978	2.33617e-85	657.278	605.787	570.438	589.701	204.781	198.266	191.52	202.737	195.195	176.456	199.198	219.664
ENSDARG00000099486	NA	-5.29958	4.13666e-79	-2.53694	5.49778e-60	317.307	315.864	271.691	272.352	11.4616	11.3295	1.95428	3.68613	59.9576	44.7128	45.4692	51.0846
ENSDARG00000027586	top3b	4.63397	4.14291e-79	-0.640423	0.0511516	12.9513	12.2073	21.4196	15.3938	418.731	337.997	449.485	383.357	6.66195	12.7751	12.2695	9.48715
ENSDARG00000102632	ubc	1.05587	4.16555e-79	1.54376	2.00063e-168	4968.44	5188.1	5643.51	5778.6	10938.2	10332.5	11781.4	11850	15622.3	15763.6	15567.8	16017.2
ENSDARG00000031929	stard14	1.486	4.66401e-79	1.49831	3.53828e-82	239.599	268.561	209.687	207.224	629.625	625.011	662.502	649.68	675.522	615.599	645.952	648.775
ENSDARG00000011769	cpm	-2.11972	5.05949e-79	-1.26421	6.25091e-35	553.668	560.01	444.175	457.078	115.38	108.574	118.234	118.878	206.521	203.603	230.955	193.392
ENSDARG00000042876	NA	0.979699	5.47592e-79	1.11594	2.21223e-103	1902.22	1823.47	1661.71	1593.85	3459.12	3287.45	3561.68	3420.73	3680.73	3807.77	3871.38	3729.91
ENSDARG00000098915	NA	-7.15111	6.01712e-79	-1.23592	5.98338e-25	540.717	537.121	475.741	442.868	1.52822	9.44126	1.95428	0.921532	205.854	223.564	180.433	235.719
ENSDARG00000020219	dld	3.62686	6.89698e-79	2.72167	4.54362e-44	12.9513	18.311	34.9478	28.4193	299.53	321.947	315.617	295.812	185.868	146.913	165.277	158.362
ENSDARG00000097207	NA	-7.36531	7.59849e-79	-9.75914	2.37778e-38	642.708	611.891	498.288	511.548	1.52822	8.49713	1.95428	1.84306	0.666195	0	0.721734	0.729781
ENSDARG00000004343	nelfe	-2.35908	7.96383e-79	-0.648466	5.46557e-09	479.198	479.137	489.269	517.469	87.1083	128.401	96.7371	71.8795	322.439	289.835	336.328	305.048
ENSDARG00000060687	chd2	-1.8183	7.96383e-79	-0.896472	7.96273e-23	935.731	834.674	816.201	705.747	220.827	262.467	214.971	233.148	451.68	431.159	414.275	466.33
ENSDARG00000074552	ndufs7	1.53952	7.96811e-79	0.118651	0.205147	317.307	326.545	343.841	269.984	965.068	829.887	904.834	951.021	349.086	346.524	327.667	340.808
ENSDARG00000011094	ccna2	1.35074	7.99907e-79	-1.06634	5.51435e-44	801.361	898.763	914.28	1011.25	2368.73	2074.24	2378.36	2451.27	431.695	437.546	431.597	434.949
ENSDARG00000089355	NA	-1.45071	8.15477e-79	0.349633	3.89899e-08	461.39	483.714	520.835	484.313	181.094	188.825	176.863	168.64	638.881	629.971	608.421	615.935
ENSDARG00000016010	nup107	-6.0634	8.23725e-79	-2.70964	6.41566e-86	336.734	352.486	330.313	328.006	2.29232	12.2736	1.95428	3.68613	53.9618	55.891	40.4171	55.4633
ENSDARG00000079202	parp2	2.59308	9.21709e-79	1.29837	2.76387e-20	166.748	177.006	201.795	138.544	1052.18	805.339	1147.17	1132.56	391.057	475.872	415.719	403.569
ENSDARG00000006683	arhgef6	-4.93818	1.21764e-78	-0.202966	0.0832931	242.837	270.087	210.814	252.222	8.40519	13.2178	4.88571	4.60766	198.526	215.579	217.964	213.096
ENSDARG00000042548	NA	-7.51974	1.38423e-78	-7.12287	5.96914e-106	647.565	657.668	552.401	516.284	2.29232	9.44126	0.977142	0	3.33098	3.19377	5.77387	4.37868
ENSDARG00000069850	mrpl30	2.79977	1.52542e-78	2.79369	4.9946e-79	25.9026	47.3033	58.6221	62.7593	389.695	320.059	358.611	331.751	352.417	364.888	341.38	337.888
ENSDARG00000036956	asxl1	-1.0028	1.96626e-78	0.781761	1.12291e-63	1074.96	1049.83	949.228	1008.89	517.301	517.381	488.571	504.999	1706.13	1779.73	1776.19	1733.96
ENSDARG00000070431	fip1l1b	2.3063	1.97395e-78	0.736366	1.00594e-08	124.656	152.591	147.683	138.544	708.328	560.811	762.171	764.871	223.175	241.13	251.885	225.502
ENSDARG00000025757	tspan35	-3.51569	2.29919e-78	0.10093	0.451316	200.745	222.783	266.054	233.275	12.9898	25.4914	25.4057	18.4306	231.17	261.889	243.224	259.802
ENSDARG00000014849	pih1d2	-2.85667	2.58387e-78	0.970224	1.11186e-20	212.077	242.62	271.691	287.746	28.272	45.318	31.2686	36.8613	528.959	476.67	489.335	505.738
ENSDARG00000014866	hprt1l	-6.48733	2.97578e-78	-5.31499	9.5146e-103	524.527	523.388	381.044	380.108	4.58465	9.44126	2.93143	2.7646	10.6591	7.98442	12.2695	13.8658
ENSDARG00000037746	actb1	0.986574	3.10609e-78	1.11116	4.08045e-99	6880.37	6828.46	7411.19	7282.45	13860.9	12692.8	14536.9	15215.4	15140	15541.7	15156.4	15547.2
ENSDARG00000090716	cltcb	-1.38297	3.26225e-78	-1.57158	1.57614e-102	859.642	778.216	954.864	911.787	334.679	343.662	332.228	337.281	299.788	309.796	280.754	292.642
ENSDARG00000052158	il23r	2.08832	3.50417e-78	1.8473	1.44874e-61	160.272	205.998	149.937	171.7	726.667	604.241	770.965	812.791	622.226	608.413	612.752	622.503
ENSDARG00000075622	zgc:174938	1.55938	5.14558e-78	-2.04461	3.1863e-70	197.507	224.309	232.234	234.459	644.143	691.1	638.074	661.66	54.628	55.0925	59.1822	47.4357
ENSDARG00000089570	NA	-2.08992	5.4284e-78	-0.743432	2.99679e-15	382.063	341.804	351.733	373.004	84.0519	79.3066	98.6914	78.3302	194.529	233.944	211.468	226.232
ENSDARG00000007971	cks1b	1.04824	6.39282e-78	-0.589044	3.94053e-22	736.605	666.824	640.334	692.721	1451.81	1330.27	1420.76	1438.51	436.358	457.507	451.084	469.979
ENSDARG00000041081	suv420h1	-3.93841	6.68427e-78	-0.215177	0.317899	940.588	938.436	836.493	851.396	52.7235	102.91	35.1771	40.5474	732.815	800.838	759.986	777.216
ENSDARG00000007135	cnot3a	-2.09245	6.74987e-78	-1.40963	2.43966e-41	626.519	607.313	633.57	544.704	126.078	156.725	166.114	117.956	249.823	229.153	222.294	205.068
ENSDARG00000024209	wasf2	-2.15671	6.91477e-78	-0.442112	4.03723e-05	723.654	770.586	730.522	652.46	142.888	214.317	142.663	145.602	530.958	534.158	555.013	495.521
ENSDARG00000035741	slc25a11	5.67693	8.04433e-78	6.55901	5.04518e-104	11.3324	9.15548	4.5094	9.47311	430.957	346.494	476.845	494.863	795.437	797.644	779.472	851.654
ENSDARG00000068918	map2k2b	-4.00475	8.74736e-78	-1.64729	2.16298e-26	339.971	308.234	275.073	220.25	19.1027	20.7708	11.7257	18.4306	89.2702	87.0302	87.3298	99.2502
ENSDARG00000036100	eya3	-0.85879	9.414e-78	-0.59954	1.19446e-41	1709.57	1799.05	1705.68	1613.98	922.278	915.802	950.759	972.216	1119.87	1131.39	1159.1	1089.56
ENSDARG00000100231	NA	-6.7719	1.06839e-77	-3.88088	7.36681e-126	472.722	408.945	418.246	415.633	0.764108	13.2178	0.977142	0.921532	28.6464	23.9533	28.8693	34.2997
ENSDARG00000037038	psmc6	1.38481	1.13208e-77	2.22403	8.9929e-209	380.444	279.242	390.063	350.505	955.899	895.975	872.588	946.413	1674.81	1672.74	1604.41	1620.84
ENSDARG00000052139	notch3	-3.41947	1.34877e-77	-1.9362	8.47446e-38	352.923	352.486	301.002	285.377	26.7438	45.318	19.5428	28.5675	79.9434	90.224	75.0603	91.2226
ENSDARG00000070723	ndufa9a	2.76063	1.622e-77	-0.611173	0.000499528	71.2321	61.0365	69.8956	78.1531	498.963	437.13	513.977	460.766	55.2942	30.3408	52.6866	44.5166
ENSDARG00000036180	ccnb2	2.5832	1.6538e-77	-0.0908155	0.6003	171.605	170.902	237.871	238.012	1247.79	1017.77	1344.55	1339.91	177.874	222.765	168.886	205.798
ENSDARG00000035985	FAM210A (1 of many)	2.69282	2.00172e-77	-3.95091	4.08476e-38	92.278	88.5029	68.7683	74.6007	551.686	437.13	526.68	557.527	5.99576	5.5891	4.3304	4.37868
ENSDARG00000060315	NA	3.05205	2.02036e-77	-5.82443	4.85123e-21	63.1376	62.5624	64.2589	46.1814	511.188	401.253	530.588	506.843	0.666195	0.798442	1.44347	0.729781
ENSDARG00000007257	rab5ab	-4.06245	2.16173e-77	-1.5102	4.02259e-18	343.209	334.175	437.411	402.607	20.6309	40.5974	14.6571	14.7445	131.907	142.921	116.921	141.577
ENSDARG00000069382	mxtx1	3.5573	2.32284e-77	2.91649	8.79847e-52	19.4269	18.311	29.3111	23.6828	268.966	257.746	302.914	271.852	174.543	174.06	179.712	177.337
ENSDARG00000092856	si:ch211-210c8.7	-4.27262	2.72423e-77	-0.206055	0.283957	399.871	347.908	358.497	401.423	12.9898	40.5974	9.77142	14.7445	313.112	354.508	328.389	310.887
ENSDARG00000086411	srsf10b	-1.71618	2.89043e-77	0.789055	1.19089e-27	393.396	398.263	365.261	441.684	117.673	127.457	121.166	120.721	660.866	711.412	682.76	709.347
ENSDARG00000037905	cacna1aa	-3.8033	2.99396e-77	-4.40248	1.28979e-94	497.006	401.315	385.553	314.981	25.9797	35.8768	25.4057	26.7244	13.9901	19.1626	24.5389	17.5147
ENSDARG00000002601	irx7	6.40829	3.42005e-77	3.91422	7.10787e-29	4.85674	10.6814	2.2547	7.10483	526.47	547.593	538.405	482.883	103.26	82.2396	90.9384	94.1417
ENSDARG00000009771	ppme1	-5.05497	3.65844e-77	-1.21357	1.10243e-22	273.596	231.939	241.253	251.037	3.82054	17.9384	3.90857	4.60766	111.921	103.798	104.651	108.737
ENSDARG00000007444	ift81	-2.39462	3.76031e-77	0.792949	3.83212e-13	443.582	445.567	467.85	489.049	79.4672	125.569	66.4457	80.1733	752.134	789.659	832.159	829.76
ENSDARG00000062469	hipk3a	-1.64939	4.04956e-77	-2.88418	2.4197e-202	1259.51	1178	1016.87	1040.86	359.895	337.053	379.131	352.947	141.9	138.131	155.173	171.498
ENSDARG00000037929	strada	2.76884	4.26098e-77	3.15763	5.93189e-102	61.5186	62.5624	47.3486	53.2862	380.526	305.897	412.354	417.454	484.324	516.592	475.622	509.387
ENSDARG00000062472	sin3b	-1.28643	4.29146e-77	-1.4721	4.43047e-102	1249.8	1170.38	1172.44	1158.09	447.003	530.599	450.463	519.744	401.716	423.174	430.875	455.383
ENSDARG00000002172	aplnra	-2.45844	4.39665e-77	-10.8497	6.04775e-29	414.441	430.307	355.115	363.531	71.062	77.4183	72.3085	62.6642	0	0	0	0
ENSDARG00000034768	phf3	-1.51845	4.40354e-77	-1.51511	9.07399e-81	853.166	741.594	748.56	696.274	278.899	270.02	250.148	257.107	269.809	273.067	242.503	275.127
ENSDARG00000041040	piga	2.8683	4.9416e-77	-0.843452	5.41372e-06	84.1834	56.4588	60.8768	66.3118	468.398	412.583	547.2	517.901	34.6422	32.7361	36.8084	43.7868
ENSDARG00000077926	NA	2.81773	5.16673e-77	1.80917	1.65101e-31	42.0917	65.6142	49.6033	62.7593	424.08	328.556	404.537	401.788	203.856	192.425	204.251	174.418
ENSDARG00000097060	NA	-2.1176	5.36534e-77	-3.13201	6.90244e-144	676.705	607.313	585.094	637.067	129.134	143.507	174.908	130.858	65.2871	79.8442	80.8342	59.842
ENSDARG00000071567	NA	2.91277	5.43887e-77	1.87171	2.6883e-31	35.6161	41.1996	46.2213	37.8924	325.51	291.735	324.411	281.989	137.902	144.518	157.338	155.443
ENSDARG00000061921	NA	-4.83197	5.50228e-77	-1.59757	4.63443e-26	297.88	288.398	232.234	265.247	10.6975	14.1619	4.88571	7.37226	93.2673	83.038	105.373	74.4376
ENSDARG00000075211	chd7	-0.68782	6.98737e-77	-0.319749	2.15493e-18	4991.1	4989.73	4743.88	4580.25	2910.49	2993.82	2949.99	3119.39	3800.64	3813.36	3947.88	3888.27
ENSDARG00000025326	myl12.2	1.66275	7.13515e-77	1.4266	4.67891e-57	280.072	270.087	337.077	368.267	1067.46	921.467	966.394	1052.39	817.422	886.271	871.133	830.49
ENSDARG00000017084	bud31	0.642721	7.51638e-77	0.214588	1.139e-09	2222.77	2134.75	2211.86	2078.16	3390.35	3278.95	3400.46	3423.49	2454.26	2523.08	2586.69	2466.66
ENSDARG00000022564	zgc:56106	-1.27961	8.53446e-77	-1.01922	3.3211e-53	1058.77	1040.67	978.539	954.416	413.382	387.092	439.714	417.454	500.979	472.678	466.962	543.687
ENSDARG00000036645	rcbtb1	-5.92113	8.78168e-77	-0.12014	0.311483	348.066	294.501	303.257	283.009	1.52822	14.1619	0.977142	3.68613	301.786	261.091	284.363	278.776
ENSDARG00000078784	mgaa	1.59476	9.27665e-77	0.774381	1.69126e-18	267.12	222.783	253.653	265.247	761.052	681.659	833.502	777.773	413.041	439.942	451.084	425.462
ENSDARG00000019420	NA	5.67553	9.53443e-77	3.54694	6.86406e-30	4.85674	3.05183	10.1461	11.8414	427.9	459.789	398.674	374.142	95.9321	94.2162	97.434	91.9524
ENSDARG00000005456	katnb1	-4.05497	1.10455e-76	-4.67977	1.08347e-95	696.132	683.609	625.679	584.964	30.5643	66.0888	31.2686	27.646	31.9774	18.3642	25.9824	23.353
ENSDARG00000039063	NA	-3.5625	1.26693e-76	-4.12884	4.48185e-92	281.691	273.138	268.309	240.38	19.1027	33.0444	18.5657	19.3522	13.3239	19.9611	14.4347	13.1361
ENSDARG00000039489	git1	-4.61062	1.53771e-76	-2.48798	1.46953e-42	391.777	309.76	262.672	319.717	11.4616	18.8825	10.7486	11.0584	45.3013	51.8988	59.1822	71.5185
ENSDARG00000103101	NA	1.82477	1.96395e-76	1.1624	7.18257e-31	103.61	122.073	138.664	130.255	424.844	466.398	445.577	438.649	275.805	265.881	284.363	294.102
ENSDARG00000006350	nkx1.2la	7.60003	1.96716e-76	3.02812	1.26413e-12	4.85674	4.57774	5.63674	2.36828	917.694	676.938	980.074	927.061	33.976	38.3252	38.2519	36.489
ENSDARG00000015224	cd2ap	-1.01663	2.02078e-76	-1.78993	2.5539e-223	2561.12	2713.07	2495.95	2376.57	1299.75	1146.17	1287.87	1273.56	742.142	761.714	718.847	708.617
ENSDARG00000009346	caprin1a	-1.30247	2.29181e-76	-0.510921	1.08052e-14	922.78	917.074	914.28	960.336	381.29	425.801	331.251	366.77	639.547	619.591	664.717	683.075
ENSDARG00000073843	myo9ab	-1.83629	2.58457e-76	-2.64262	8.03973e-146	1073.34	1025.41	854.53	904.682	288.833	246.417	294.12	246.971	169.214	157.293	140.738	148.145
ENSDARG00000021408	kdelc2	-2.14258	2.63519e-76	-1.53317	1.84444e-46	547.192	462.352	476.869	459.446	106.211	131.233	113.349	89.3886	153.225	176.456	181.155	160.552
ENSDARG00000058287	gpalpp1	-2.10023	2.82252e-76	-0.740126	1.56246e-12	799.742	599.684	589.603	580.228	138.304	160.501	151.457	147.445	400.383	360.896	388.293	382.405
ENSDARG00000016058	fibpa	-2.38542	3.04724e-76	-2.04923	5.44398e-67	338.353	347.908	357.37	290.114	53.4876	62.3123	73.2857	67.2718	79.9434	79.0458	82.9994	79.5461
ENSDARG00000016733	psat1	3.76467	3.99851e-76	0.454716	0.0512723	29.1404	38.1478	30.4384	40.2607	467.634	349.327	542.314	529.881	52.6294	46.3097	42.5823	48.1655
ENSDARG00000019581	uso1	2.27004	4.05065e-76	1.93995	7.62019e-56	74.4699	86.977	109.353	79.3373	465.342	456.013	407.468	378.75	346.422	335.346	346.432	331.32
ENSDARG00000009031	tnikb	-3.35106	4.54114e-76	0.188976	0.115808	215.315	202.946	216.451	234.459	17.5745	33.0444	12.7029	22.1168	237.166	257.897	266.32	232.07
ENSDARG00000101982	spryd3	-3.83966	4.63672e-76	-1.66415	1.79224e-25	318.926	363.167	281.837	256.958	16.0463	22.659	32.2457	14.7445	99.9293	102.999	98.1558	82.4652
ENSDARG00000095388	NA	2.63168	5.17763e-76	1.4266	1.66729e-22	118.181	100.71	68.7683	81.7056	531.055	504.163	607.783	610.976	237.832	281.85	226.624	231.34
ENSDARG00000030335	zc3h10	4.60724	5.63399e-76	2.6929	1.24614e-25	9.71347	9.15548	15.7829	15.3938	333.915	306.841	298.028	335.438	93.2673	71.0614	87.3298	85.3843
ENSDARG00000062699	nkain4	-2.65476	5.82027e-76	-0.390602	0.000697788	338.353	306.708	290.856	278.273	40.4977	57.5917	43.9714	50.6843	241.829	249.114	197.033	234.989
ENSDARG00000069432	plscr3b	1.6265	6.64827e-76	0.458174	4.58611e-07	623.281	599.684	553.528	560.098	1800.24	1489.83	2020.73	1891.91	811.426	780.078	812.672	799.11
ENSDARG00000045298	NA	2.82521	6.77602e-76	2.65002	3.5755e-67	55.043	32.0442	71.023	62.7593	434.013	340.829	443.623	384.279	351.751	363.291	359.423	345.916
ENSDARG00000044010	loxl2a	-6.6284	6.81562e-76	-9.48959	1.00769e-35	543.954	550.855	396.827	397.871	5.34876	7.55301	5.86285	0	1.33239	0	0	0.729781
ENSDARG00000029150	hsp90ab1	0.802066	7.01301e-76	-0.36166	2.26855e-16	13326.9	13808	13931.8	13526.4	24265.8	21499.6	24529.2	24903.5	10538.5	10714.3	10540.2	10697.9
ENSDARG00000020676	dpp3	-3.81286	7.36776e-76	-5.81773	6.04995e-96	456.533	500.499	367.516	342.216	31.3284	20.7708	34.2	31.3321	4.66337	4.79065	8.6608	10.9467
ENSDARG00000029003	eif1axa	-1.51597	7.47122e-76	1.28162	2.76969e-85	463.009	428.781	519.708	504.443	161.991	184.105	168.068	160.347	1138.53	1212.04	1180.03	1155.24
ENSDARG00000071555	zgc:153675	3.64392	7.50949e-76	1.92969	6.05804e-21	6.47565	24.4146	25.929	36.7083	301.823	314.394	302.914	310.556	87.2716	83.038	106.095	97.7906
ENSDARG00000068193	tmem44	-6.86173	7.79969e-76	-0.817604	2.52647e-20	443.582	405.893	387.808	393.134	0.764108	11.3295	0.977142	0.921532	229.171	239.533	225.903	227.692
ENSDARG00000104501	NA	3.91325	7.91413e-76	-2.46103	1.09772e-11	14.5702	19.8369	25.929	34.34	340.792	339.885	378.154	419.297	2.66478	5.5891	5.77387	3.6489
ENSDARG00000051761	trim44	-1.67273	8.30985e-76	0.00856168	0.962235	529.384	601.21	475.741	525.758	146.709	177.496	177.84	166.797	539.618	537.352	542.022	518.144
ENSDARG00000017947	ptk6a	3.74264	8.39558e-76	4.36919	2.23272e-104	19.4269	12.2073	27.0564	39.0766	329.331	276.629	381.086	383.357	553.608	524.577	533.361	503.549
ENSDARG00000038687	nfkb2	-3.31271	8.62862e-76	-3.49071	1.16282e-85	728.51	575.269	592.985	490.233	82.5237	50.9828	57.6514	46.0766	45.3013	58.2863	50.5214	57.6527
ENSDARG00000058968	haus1	4.39915	8.88359e-76	-1.46973	2.40548e-05	8.09456	16.785	23.6743	17.7621	391.987	314.394	384.017	367.691	9.99293	4.79065	5.77387	3.6489
ENSDARG00000103203	vps28	1.95459	8.93372e-76	0.0237481	0.882815	506.719	497.448	402.464	374.188	1824.69	1447.34	1771.56	1828.32	440.355	478.267	423.658	459.762
ENSDARG00000058488	adora2ab	2.1801	1.03071e-75	2.85687	9.99386e-136	71.2321	67.1402	72.1503	79.3373	317.105	317.226	366.428	323.458	520.298	522.98	548.518	521.793
ENSDARG00000023330	NA	1.02923	1.04769e-75	0.155262	0.00791278	2863.85	2856.51	2858.96	2890.48	5801.11	5193.64	6205.83	6212.97	3255.03	3290.38	3057.99	3170.9
ENSDARG00000104413	rogdi	-2.71975	1.04769e-75	-3.16779	4.45225e-99	539.098	540.173	430.647	406.16	71.8262	76.4742	62.5371	78.3302	62.6224	47.1081	56.2952	45.2464
ENSDARG00000061400	csgalnact2	-3.58423	1.05382e-75	-3.68008	2.24811e-86	267.12	270.087	245.762	220.25	20.6309	28.3238	13.68	20.2737	17.9873	19.9611	19.4868	20.4339
ENSDARG00000044669	hp1bp3	-0.977633	1.14587e-75	-0.408201	6.67264e-15	3590.75	3564.53	3323.42	3258.75	1752.86	1571.97	1808.69	1834.77	2634.8	2630.87	2510.91	2565.18
ENSDARG00000097485	NA	-3.60349	1.31959e-75	-0.750991	3.78077e-05	790.029	790.423	755.324	796.925	58.8363	108.574	49.8343	39.6259	450.348	428.764	485.005	495.521
ENSDARG00000016253	ralab	4.16266	1.37099e-75	0.510533	0.0538813	16.1891	15.2591	18.0376	33.1559	388.931	339.885	446.554	351.104	35.9745	29.5424	25.2607	29.921
ENSDARG00000057007	ctbp1	0.957148	1.58579e-75	0.420919	2.02843e-15	775.459	740.068	815.073	860.869	1622.2	1470.95	1573.2	1550.02	1074.57	1080.29	1064.56	1069.86
ENSDARG00000099184	map2k6	2.28185	1.69902e-75	2.04132	8.55632e-61	108.467	105.288	112.735	119.598	552.45	439.963	625.371	562.134	452.347	454.314	486.448	451.734
ENSDARG00000103200	gpr107	-6.45763	2.24863e-75	-0.837969	1.83602e-07	466.247	447.092	377.662	343.4	0.764108	13.2178	0	4.60766	229.837	262.688	227.346	191.932
ENSDARG00000010246	prmt1	-0.975308	2.2784e-75	-0.123276	0.0200147	2136.96	2073.72	2010.06	1817.65	1026.96	960.176	1040.66	1052.39	1820.05	1877.94	1837.53	1831.75
ENSDARG00000063145	NA	3.85642	2.30457e-75	3.44083	4.86386e-60	14.5702	19.8369	15.7829	22.4986	260.561	272.852	262.851	271.852	197.86	188.432	217.242	196.311
ENSDARG00000100260	THEM6 (1 of many)	3.01948	2.48197e-75	-0.495782	0.0129861	35.6161	68.6661	50.7307	44.9973	421.788	348.382	436.783	416.532	31.3112	33.5346	36.8084	40.1379
ENSDARG00000018956	tmem39b	-2.84819	2.68513e-75	-2.1331	1.51146e-52	382.063	350.96	396.827	368.267	38.9695	75.5301	47.88	46.9981	89.9364	91.0224	75.0603	85.3843
ENSDARG00000038308	ykt6	-5.2633	2.71412e-75	-3.0944	1.15283e-68	297.88	326.545	261.545	268.799	4.58465	16.9943	3.90857	4.60766	33.976	39.1237	30.3128	31.3806
ENSDARG00000045543	atp6v1f	1.61942	2.89389e-75	0.199661	0.0353933	566.619	598.158	470.104	525.758	1744.46	1443.57	1795.01	1632.95	612.9	649.932	635.126	575.067
ENSDARG00000054259	nat10	-3.0391	2.99433e-75	1.37628	4.00764e-42	205.602	190.739	242.38	219.066	24.4515	39.6533	19.5428	21.1952	554.274	572.483	586.769	527.631
ENSDARG00000037046	rad51b	4.99039	3.6049e-75	-4.18844	1.16325e-07	14.5702	13.7332	7.89144	13.0255	424.844	326.668	406.491	375.063	0.666195	0.798442	0.721734	0
ENSDARG00000014817	ranbp1	0.991552	3.78427e-75	0.356319	8.81039e-11	2140.2	2177.48	2056.28	1968.04	4141.47	3745.35	4318.97	4364.38	2767.38	2641.25	2619.17	2638.89
ENSDARG00000040184	syncrip	-0.785558	4.05423e-75	-0.781012	8.36447e-75	11107.4	10496.8	10568.9	10744.9	5962.33	6742	6193.13	6001.02	5982.43	6330.85	6409.72	6251.3
ENSDARG00000103026	p3h2	-7.89406	5.07581e-75	-11.0418	9.35431e-30	720.416	732.438	583.967	581.412	1.52822	7.55301	0	1.84306	0	0.798442	0	0
ENSDARG00000007045	cnot4a	1.52245	5.07734e-75	-1.11801	2.64512e-28	213.696	202.946	210.814	191.83	598.297	555.146	592.148	603.603	99.2631	92.6193	90.9384	93.4119
ENSDARG00000098466	ube2a	-1.16566	5.16633e-75	0.909019	6.2671e-62	804.599	894.185	789.144	764.954	366.008	377.65	326.366	374.142	1522.92	1549.78	1499.76	1519.4
ENSDARG00000000568	ell	2.80778	5.78929e-75	1.42791	3.54713e-19	38.8539	39.6737	59.7495	47.3655	330.095	289.847	360.566	349.261	132.573	122.162	128.469	126.982
ENSDARG00000023448	galnt14	-4.08372	6.1131e-75	-3.6836	9.58823e-77	344.828	328.071	249.144	275.904	14.5181	13.2178	25.4057	17.5091	19.9859	28.7439	24.5389	19.7041
ENSDARG00000058448	zrsr2	-6.70143	6.8993e-75	-2.18508	1.31716e-52	482.436	431.833	368.643	362.346	1.52822	10.3854	2.93143	0.921532	92.6011	79.8442	98.1558	89.0332
ENSDARG00000058820	bin1b	-3.47231	8.13103e-75	-10.3091	5.55564e-26	534.241	407.419	370.898	380.108	32.8566	38.7092	47.88	33.1751	0	0.798442	0	0
ENSDARG00000086703	si:dkey-126g1.7	-6.06273	8.35278e-75	-4.65925	1.11863e-99	362.636	402.841	341.587	297.219	4.58465	12.2736	0.977142	2.7646	15.3225	14.372	12.9912	12.4063
ENSDARG00000074544	znf1007	2.91348	9.04702e-75	-2.15217	4.17443e-24	66.3754	80.8734	85.6785	103.02	636.502	522.102	732.857	669.032	22.6506	12.7751	20.2085	19.7041
ENSDARG00000093456	NA	-1.65893	1.04382e-74	0.190063	0.0349227	1248.18	1348.91	1209.65	1296.63	374.413	505.107	384.994	352.025	1445.64	1485.9	1475.95	1412.86
ENSDARG00000075041	fmnl2b	3.27542	1.16605e-74	4.59105	7.17362e-151	29.1404	24.4146	27.0564	28.4193	256.74	302.12	239.4	264.48	623.559	677.878	649.56	694.751
ENSDARG00000036811	ifrd2	2.27029	1.18489e-74	1.54718	1.63921e-34	67.9943	80.8734	90.1879	91.1787	437.834	401.253	384.017	388.886	261.815	254.703	212.911	248.125
ENSDARG00000008014	nudt17	4.52785	1.24852e-74	1.64334	5.86657e-10	6.47565	10.6814	11.2735	23.6828	322.454	295.511	340.046	307.792	42.6365	36.7283	43.304	48.1655
ENSDARG00000104169	NA	-0.948163	1.28723e-74	-0.677524	1.45074e-41	1562.25	1480.14	1629.02	1636.48	864.97	776.071	847.182	783.302	992.631	962.123	1007.54	987.393
ENSDARG00000000730	slc6a13	-1.90611	1.31942e-74	-3.1435	1.00015e-174	1016.68	1028.47	980.793	963.889	255.212	206.764	295.097	306.87	108.59	103.798	114.034	124.063
ENSDARG00000094410	NA	2.61531	1.39463e-74	1.52275	6.60415e-25	48.5674	53.4069	52.9854	53.2862	318.633	286.07	330.274	347.418	139.235	154.898	158.781	148.875
ENSDARG00000016964	MCUR1	2.53946	1.73185e-74	2.02742	1.89137e-47	51.8052	76.2956	73.2777	47.3655	377.469	311.562	381.086	378.75	247.825	258.695	256.215	253.964
ENSDARG00000020187	GCA	1.36384	1.77577e-74	0.878677	3.51229e-31	233.123	247.198	287.474	298.403	715.969	672.218	670.32	713.266	504.976	498.228	487.892	490.413
ENSDARG00000078401	NA	-5.2923	1.78072e-74	-4.97378	2.12093e-88	346.447	294.501	275.073	258.142	6.11286	10.3854	4.88571	8.29379	11.9915	7.18598	5.77387	11.6765
ENSDARG00000004525	zgc:63882	1.6754	1.84565e-74	1.60675	9.63246e-70	165.129	125.125	164.593	143.281	503.547	443.739	482.708	484.726	451.014	455.911	451.084	469.979
ENSDARG00000077559	NA	6.7936	1.94668e-74	2.26091	8.36855e-09	1.61891	4.57774	9.01879	8.28897	712.149	536.263	811.028	806.34	39.9717	19.9611	34.6432	27.7317
ENSDARG00000043884	nup43	-2.53026	2.14514e-74	-0.825616	4.22013e-14	286.547	279.242	246.889	280.641	49.667	43.4298	49.8343	45.1551	155.89	154.099	134.242	170.769
ENSDARG00000055477	pelo	-1.09338	2.42465e-74	-0.956278	2.60186e-62	930.874	895.711	838.748	827.713	413.382	418.248	390.857	407.317	445.685	450.321	452.527	445.166
[truncated: 29,956 more rows]
