# Supplementary material for: TEADs, Yap, Taz, Vgll4s transcription factors control the establishment of Left-Right asymmetry in zebrafish
Source: eLife journal article supplement (doi:10.7554/elife.45241), 2019-09-12
Supplement: supp [file elife-45241-supp-v1.zip › elife_poa_e45241_Supplementary_file_2.xlsx]

## Sheet: Feuil1
	Gene	Ctrl	Vgll4l	Yap/Taz	vgll4l Fold Change	YT Fold Change	Vgll4l padj	YT padj	Reference
	ITGB2	30	0	152	-4.8	2.3	2.7784e-12	2.43552e-28	1	11 genes Upregulated in Yap/Taz morphants and
	ZCCHC8	86	10	185	-3	1	5.48997e-27	2.19601e-08	1	Downregulated in Vgll4l morphants
	NAT10	214	26	560	-3	1.3	2.99433e-75	4.00764e-42	1
	LSG1	32	5	273	-2.5	3	0.00120485	3.00628e-05	1
	SOAT1	5	0	137	-2.5	4.5	0.00129494	6.11171e-34	1
	NASP	656	153	1319	-2	1	1.43538e-63	5.25123e-19	1
	ACAT2	3	0	176	-2	5.4	0.016749	2.63182e-32	1
	RABGEF1	24	8	123	-1.5	2.3	6.4548e-06	4.87304e-21	1
	PSTPIP2	5	2	228	-1.2	5.4	0.0472701	8.45498e-45	1
	PDCD5	493	215	1035	-1.1	1	2.02848e-36	2.09379e-36	1
	TMEM106C	159	75	448	-1	1.5	7.90467e-14	8.45351e-36	1
	PKN3	14	28	0	1	-6.2	0.00551088	1.03371e-09	1	14 genes Downregulated in Yap/Taz morphants
	POLE3	261	676	112	1.3	-1.2	2.6174e-50	2.19528e-31	1	and Upregulated in Vgll4l morphants
	CCNA2	906	2318	433	1.3	-1	7.99907e-79	5.51435e-44	1
	FOSL1b	13	39	0	1.4	-6.2	8.88366e-06	8.05813e-10	1
	CEP57L1	49	143	0	1.5	-6.6	1.76355e-15	1.69955e-14	1
	JADE1	118	377	42	1.6	-1.4	3.06045e-39	1.53709e-21	1
	RAD18	68	229	0	1.7	-6.3	1.83241e-24	8.69643e-21	1
	BUB1Ba	5	23	1	1.9	-1.9	0.00127862	0.0100977	1
	ZWILCH	30	167	0	2.4	-6.5	2.93593e-28	3.90512e-11	1
	AKAP12a	7	53	0	2.8	-5.3	1.41873e-11	3.57324e-07	1
	FAM46Ba	486	3425	153	2.8	-1.6	1.50677e-184	2.56681e-52	1
	HAUS4	9	86	3	3.1	-1.5	1.29405e-17	0.00182509	1
	SLC35F3a	4	71	0	4	-3.8	1.15839e-16	0.00033173	1
	THG1L	3	64	0	4.1	-4.3	3.09576e-17	6.72097e-05	1
	WWC1	205	0	38	-8.4	-2.4	2.537e-22	5.5384e-32	1	61 downregulated
	IRAK1	73	0	1	-8.4	-6	4.97655e-17	2.45271e-21	1	in both Yap/Taz and Vgll4l morphants
	LAYNa	115	0	0	-8.4	-9.3	3.43221e-17	7.59859e-21	1
	FSTb	295	0	0	-8.2	-10.6	1.18658e-31	2.26408e-27	1
	SNAPC1a	92	0	0	-8	-5.7	3.517e-16	1.18899e-29	1
	F3a	127	0	0	-7.9	-9.4	6.14936e-17	3.36776e-21	1, 2
	p3h2	654	2	0	-7.8	-11	5.07581e-75	9.35431e-30	1
	MED30	96	0	0	-7.5	-9.1	8.38184e-16	3.70424e-20	1
	CDH4	132	0	0	-7.4	-8.8	4.2125e-20	8.68141e-19	1
	RMBS3	47	0	0	-7.1	-7.4	9.04171e-13	1.15705e-13	2
	IGFBP3	278	2	0	-6.9	-9.8	2.56956e-47	9.41899e-24	1, 2
	PIK3CB	676	5	202	-6.8	-1.7	6.29174e-39	0.000145267	3
	METTL8	37	0	8	-6.7	-2.1	2.43317e-11	7.54414e-10	1
	XPO5	64	0	25	-6.3	-1.3	5.61215e-16	1.64282e-06	1
	SFXN4	16	0	1	-6.2	-3.6	8.55924e-09	1.29095e-06	1
	DIAPH3	57	0	0	-6.2	-7.6	3.25061e-14	2.37215e-14	1
	CDC42EP3	21	0	0	-6	-6.9	1.59169e-08	6.57083e-11	1
	CRIM1	60	0	0	-5.9	-8.3	5.99439e-15	1.62397e-16	1, 2
	SAMD4A	12	0	0	-5.8	-6.1	2.34017e-06	7.67618e-07	1
	ASB1	263	5	0	-5.6	-9.7	1.81593e-66	1.91135e-23	1
	RND3b	34	0	0	-5.5	-6.9	1.21269e-10	1.50377e-11	1
	SLC1A5	13	0	0	-5.3	-5.6	1.38763e-06	3.78443e-07	1
	BCAT1	8	0	0	-5.3	-5.6	1.89882e-05	6.86474e-06	1
	si:ch211-275j6.5	30	0	0	-5.3	-6.7	3.51333e-10	3.83312e-11	1
	FOSL1a	184	4	1	-5.3	-6.9	1.31329e-51	5.62676e-41	1
	POC1A	7	0	0	-5.2	-4.9	6.62334e-06	2.9312e-05	1
	TUBG1	447	12	170	-5.1	-1.3	1.43072e-114	1.64205e-27	1
	PPME1	249	7	107	-5	-1.2	3.65844e-77	1.10243e-22	1
	DOCK5	11	0	4	-5	-1.2	2.46175e-06	0.020451	2
	PABPC4	40	1	2	-5	-4	5.60771e-12	9.17323e-13	1
	NMT2	521	16	60	-4.9	-3.1	1.28677e-84	2.01631e-50	1
	ETS2	1128	39	76	-4.8	-3.8	1.81227e-127	5.6465e-99	1
	CCDC80	27	0	0	-4.8	-6.6	3.89572e-10	9.80645e-11	2
	GPATCH4	262	10	73	-4.6	-1.8	6.211e-83	4.60704e-42	1
	CORO1Cb	211	8	6	-4.6	-5	7.93276e-65	2.17552e-72	1
	RALGPS2	424	17	1	-4.6	-8.2	2.55918e-49	6.17254e-46	1
	KIF14	565	25	90	-4.4	-2.6	1.21518e-140	2.31244e-90	1
	KATNB1	647	38	24	-4	-4.6	1.10455e-76	1.08347e-95	1
	TBCE	493	48	56	-3.3	-3.1	5.30243e-120	3.92073e-122	1
	ASAP1a	3	0	0	-3.3	-4.2	0.0203966	0.00289007	1
	TRMT5	463	48	113	-3.2	-2	1.03328e-112	4.41834e-63	1
	UBR4	1844	187	340	-3.2	-2.4	6.3153e-235	2.57991e-149	1
	SLC25A32a	524	58	101	-3.1	-2.3	1.21404e-82	3.7865e-55	1
	PTPN2a	174	20	0	-3.1	-8	2.52041e-36	5.19078e-26	1
	TUBB1	5	0	0	-2.8	-4.9	0.0254537	0.000282117	1
	YOD1	574	85	126	-2.7	-2.1	5.27509e-159	1.2496e-131	1
	SGOL1	392	73	10	-2.4	-5.2	4.26373e-73	9.14166e-126	1
	LIMA1a	3633	767	1010	-2.2	-1.8	5.28133e-146	2.37509e-102	1
	NEMP1	65	15	7	-2	-3	1.36362e-10	4.80612e-19	1
	PANK2	378	91	26	-2	-3.8	1.95456e-31	1.06549e-83	1
	CSPP1a	933	284	45	-1.7	-4.3	8.56696e-116	0	1
	BASP1	32	9	0	-1.7	-7.4	0.000499249	1.91884e-12	1
	SMC3	2091	664	928	-1.6	-1.1	9.66803e-116	3.67187e-62	1
	RAB11FIP1a	29	9	0	-1.6	-6.6	0.000221947	1.44954e-10	1
	CEP152	203	70	1	-1.5	-7	6.03457e-19	5.46576e-43	1
	SHMT2	69	24	24	-1.4	-1.4	2.89843e-10	1.27064e-10	1
	CEP290	227	90	100	-1.3	-1.1	2.25831e-22	2.44463e-19	1
	MRPL9	140	54	39	-1.3	-1.8	1.0742e-15	3.00822e-26	1
	CORO1Ca	709	294	179	-1.2	-1.9	7.35107e-37	3.04229e-84	1
	CEP55l	577	263	246	-1.1	-1.2	7.24755e-26	5.01253e-31	1
	LARP4ab	485	232	239	-1	-1	7.78762e-25	4.62066e-24	1
	MRPL18	85	184	460	1	2.4	1.30717e-18	1.95305e-97	1	57 genes upregulateds
	UBE2E2	192	435	1174	1.1	2.6	1.16756e-51	1.2067e-284	1	in both Yap/Taz and Vgll4l morphants
	KIF2C	81	183	938	1.1	3.4	8.04122e-16	4.19657e-154	1
	BOD1	75	197	334	1.3	2.1	4.19129e-26	4.24724e-65	1
	SRSF2a	3169	8571	6563	1.4	1	2.52706e-164	2.17916e-88	1
	OXNAD1	22	62	70	1.4	1.5	2.53103e-08	2.12341e-10	1
	MAGOH	1003	2875	2050	1.5	1	8.60384e-215	8.1972e-99	1
	DDX46	177	527	535	1.5	1.5	8.50581e-41	1.8476e-42	1
	RRS1	185	613	973	1.7	2.3	7.59833e-115	1.77176e-234	1
	ZPR1	141	558	506	1.9	1.8	2.14092e-89	5.64603e-78	1
	SERTAD2a	8	35	76	1.9	3	7.50443e-08	1.36437e-18	1
	NEDD4L	2	9	28	1.9	3.5	0.00283522	5.10924e-09	1
	DDX21	201	836	1359	2	2.7	7.95005e-143	1.11964e-268	1
	HBEGFa	0	4	55	2	5.6	0.0241416	1.8336e-12	1
	GPN3	11	51	388	2.2	5.1	7.45485e-14	4.86685e-74	1
	TIMM10	88	458	187	2.3	1.1	5.89748e-89	9.82897e-19	1
	GNL2	99	521	293	2.3	1.5	2.99428e-66	1.90731e-28	1
	HSPA9	687	3438	2134	2.3	1.6	6.30291e-304	1.01098e-149	1
	NUP93	268	1374	932	2.3	1.8	4.19094e-110	2.72905e-64	1
	POLH	5	30	43	2.4	2.9	1.65536e-08	3.33233e-12	1
	DNAJA3a	104	671	219	2.6	1	8.79328e-113	1.52203e-17	1
	B3GALNT2	31	207	100	2.6	1.6	1.61209e-49	2.48214e-18	1
	C1QBP	132	906	318	2.7	1.2	3.16092e-214	1.1284e-42	1
	MCM7	169	1139	886	2.7	2.3	3.67106e-113	1.90945e-85	1
	HYI	0	5	13	2.8	4	0.0133366	0.000217747	1
	E2F3	92	709	324	2.9	1.8	2.38904e-70	5.84534e-27	1
	GNL3	94	715	415	2.9	2.1	4.87371e-126	1.04811e-66	1
	prelid3a	3	32	33	3	3.1	2.09206e-09	5.80881e-10	1
	NEURL1B	2	21	547	3.1	7.7	2.29003e-08	8.76974e-49	1
	AIMP2	53	506	390	3.2	2.8	6.80864e-128	9.13157e-100	1
	NCBP2	298	3830	1773	3.6	2.5	0	0	1
	NAA15b	26	336	214	3.6	3	1.71547e-73	8.72371e-50	1
	RBM24a	29	370	942	3.6	4.9	1.3505e-97	9.01964e-188	1
	GADD45Ab	1	15	202	3.6	7	1.84416e-07	1.41299e-25	1, 2
	TDP1	6	88	55	3.7	3	1.7473e-22	1.4849e-15	1
	MED27	98	1594	292	3.9	1.5	2.17604e-235	3.86908e-34	1
	RCAN1a	35	583	151	3.9	2	1.6134e-126	3.00539e-32	1
	CCDC137	20	311	690	3.9	5	4.14126e-91	1.49881e-155	1
	SNAI2	0	16	106	4.2	6.9	4.22209e-06	1.31044e-14	1
	RTN4IP1	0	10	157	4.2	8.1	2.0748e-05	6.84463e-17	1
	RPUSD2	0	12	308	4.4	9	8.63065e-06	1.35616e-20	1
	EIF3Jb	61	1432	542	4.5	3.1	2.36924e-220	1.81531e-103	1
	GADD45Bb	94	2179	1430	4.5	3.9	0	0	1
	CSE1L	10	274	126	4.7	3.5	6.56692e-63	1.75138e-36	1
	USP43b	1	73	13	5.1	2.6	2.56344e-17	1.98046e-05	1
	MTG1	5	211	78	5.3	3.9	1.75197e-43	1.30195e-23	1
	CYP20A1	7	423	223	5.6	4.7	2.7717e-69	1.3526e-48	1
	MRPL21	12	833	534	5.9	5.3	7.4089e-144	1.57451e-114	1
	MYCb	0	34	114	5.9	7.6	1.95516e-09	4.81255e-15	1
	CRY1AA	1	79	6	6.1	2.5	8.31875e-15	0.00189528	1
	NOC3L	2	230	315	6.3	6.7	6.98258e-35	6.56919e-40	1
	ATAD2	0	54	17	6.6	5	2.24583e-11	5.42149e-07	1
	DPH7	0	92	72	7.3	6.9	7.87537e-14	1.18512e-12	1
	RPP40	0	118	17	7.7	4.9	3.93609e-15	7.18396e-07	1
	RNMTL1a	1	360	153	7.8	6.6	1.16427e-31	8.49497e-23	1
	CTNNAL1	2	690	420	7.8	7.1	7.64391e-53	6.9976e-44	1
	FTSJ2	0	120	17	8.4	5.6	6.18836e-18	1.23281e-08	1
	zebrafish homolog of YAP direct target genes in human expressed in DFCs and differentially expressed in both Vgll4l and Yap/Taz morphants (normalized counts ≥1, llog2foldchangel≥1, adjusted P value ≤0,05)
	25 (17.5%) genes are regulated in opposite way by Vgll4l and Yap/Taz
	118 (82.5%) genes are regulated similarly by Vgll4l and Yap/Taz
