# Supplementary material for: TEADs, Yap, Taz, Vgll4s transcription factors control the establishment of Left-Right asymmetry in zebrafish
Source: eLife journal article supplement (doi:10.7554/elife.45241), 2019-09-12
Supplement: supp [file elife-45241-supp-v1.zip › elife_poa_e45241_Supplementary_file_3.xlsx]

## Sheet: Sans titre
	Differential expression of genes known to be required for DFCs and/or KV development
	Gene symbol	control	Vgll4l KD	Vgll4l vs Ctrl log2 fold change		Gene symbol	control	Yap/Taz KD	Yap/Taz vs Ctrl log2 fold change
1	aftphb	156	0	-8.2	1	aftphb	156	0	-9.7
2	lace1b	474	2	-7.8	2	abcc4	184	0	-9.3
3	abcc4	184	0	-7.5	3	lace1b	474	0	-9.1
4	ttc39c	370	2	-7.4	4	plcxd2	98	0	-9
5	pkd2	145	0	-7.2	5	pkd2	145	0	-8.3
6	bbs2	298	1	-7.2	6	ippk	69	0	-7.9
7	ippk	69	0	-7	7	fto	52	0	-6.3
8	dnah7	1204	8	-7	8	arhgef18b	2308	35	-6
9	ttll3	25	0	-6.9	9	lpar3	9	0	-5.7
10	lrrc6	1602	11	-6.9	10	enpp2	9	0	-5.7
11	nkd2a	24	0	-6.8	11	dnah7l	964	21	-5.4
12	ssx2ipa	103	0	-6.7	12	ttll3	25	0	-5.3
13	dnah7l	964	11	-6.4	13	eomesa	6	0	-5.2
14	ndr1	521	5	-6.4	14	efnb2b	30	0	-5.2
15	gle1	494	5	-6.4	15	lrrc6	1602	44	-5
16	arhgef11	1377	14	-6.4	16	ssx2ipa	103	4	-4.6
17	mapk8b	199	2	-6.3	17	inpp5e	328	12	-4.6
18	daw1	1997	26	-6	18	nkd2a	24	1	-4.4
19	dnaaf4	1099	17	-5.9	19	plk4	4	0	-3.8
20	fzd2	125	2	-5.8	20	fermt2	103	7	-3.7
21	nkd3	18	0	-5.7	21	ndr1	521	46	-3.4
22	arl6	440	7	-5.7	22	tbx16	5302	479	-3.4
23	plcxd2	98	2	-5.5	23	smad3b	8	0	-3.3
24	lpar3	9	0	-5.4	24	dnah7	1204	125	-3.2
25	smad3b	8	0	-5.2	25	mapk8b	199	21	-3.2
26	cep41	355	10	-4.9	26	bbs7	1089	115	-3.2
27	bbs9	82	2	-4.9	27	rpgrb	519	52	-3.2
28	enpp2	9	0	-4.8	28	gle1	494	52	-3.1
29	atr	93	3	-4.8	29	tp53bp2b	692	79	-3.1
30	atp6ap1b	2258	95	-4.5	30	cep41	355	41	-3
31	spa17	1669	68	-4.5	31	ttc39c	370	51	-2.8
32	nde1	414	21	-4.2	32	dicer1	65	9	-2.8
33	fto	52	2	-4.1	33	bbs9	82	11	-2.7
34	bbs7	1089	65	-4	34	cftr	2565	386	-2.7
35	tekt1	625	37	-4	35	arhgef11	1377	218	-2.6
36	ahi1	795	47	-4	36	fgfr2	98	16	-2.5
37	sirt2	20	1	-4	37	ocrl	153	26	-2.5
38	dnaaf1	1097	70	-3.9	38	bbs2	298	54	-2.4
39	ccdc151	1766	122	-3.8	39	atp1a2a	7	1	-2.3
40	eomesa	6	0	-3.7	40	nkd3	18	3	-2.2
41	ephb4b	5738	482	-3.5	41	dnaaf4	1099	255	-2.1
42	bbs1	367	30	-3.5	42	foxj1a	22546	5205	-2.1
43	arhgef18b	2308	214	-3.4	43	ephb4b	5738	1363	-2
44	cdc14b	610	56	-3.4	44	ttc9c	406	100	-2
45	nphp3	5	0	-3.3	45	nphp4	1701	402	-2
46	camk2b2	2	0	-3.2	46	fzd2	125	31	-1.9
47	fzd10	1316	151	-3.1	47	nphp3	5	1	-1.8
48	fermt2	103	12	-3	48	cldn5a	1909	611	-1.6
49	ttc26	1898	265	-2.8	49	cfap53	1711	539	-1.6
50	poc1b	366	52	-2.7	50	cdc14aa	1214	394	-1.6
51	rpgrb	519	83	-2.6	51	unc119b	1	0	-1.6
52	tp53bp2b	692	121	-2.5	52	tekt1	625	210	-1.5
53	zbbx	360	60	-2.5	53	cx43.4	17076	5716	-1.5
54	fgfr2	98	18	-2.4	54	ahi1	795	287	-1.4
55	cldn5a	1909	359	-2.4	55	llgl2	2003	749	-1.4
56	foxj1a	22546	4299	-2.3	56	bbip1	415	153	-1.4
57	cfap53	1711	332	-2.3	57	atp6ap1b	2258	890	-1.3
58	ak9	407	94	-2.1	58	camk2g1	144	55	-1.3
59	ttc25	1141	254	-2.1	59	spa17	1669	688	-1.2
60	cluap1	635	140	-2.1	60	dnaaf1	1097	450	-1.2
61	bbs4	4	1	-2	61	bbs4	4	2	-1.2
62	unc119.1	1723	456	-1.9	62	ta	27409	11524	-1.2
63	cftr	2565	696	-1.8	63	amotl2a	912	394	-1.2
64	ta	27409	8341	-1.7	64	rfx2	2608	1183	-1.1
65	rfx2	2608	776	-1.7	65	cep290	227	100	-1.1
66	vangl2	3007	901	-1.7	66	sox32	27536	12883	-1
67	cdc14aa	1214	373	-1.6	67	klf8	2	1	-1
68	llgl2	2003	628	-1.6	68	cdc14b	610	321	-0.9
69	cnpy1	566	182	-1.6	69	ttc26	1898	1000	-0.9
70	pard3	160	54	-1.5	70	wnt11	3180	1622	-0.9
71	bbip1	415	150	-1.4	71	sox17	18139	9685	-0.9
72	wnt11	3180	1141	-1.4	72	fgfr1a	1209	643	-0.9
73	pcm1	417	154	-1.4	73	prickle1a	892	454	-0.9
74	cep290	227	90	-1.3	74	cfl1	1538	851	-0.8
75	ttc4	640	251	-1.3	75	fgf24	18	10	-0.8
76	tbx16	5302	2283	-1.2	76	lft2	1	0	-0.8
77	cenpf	666	269	-1.2	77	arl6	440	268	-0.7
78	sox32	27536	12952	-1	78	gmnn	733	431	-0.7
79	sox17	18139	8628	-1	79	fzd10	1316	819	-0.6
80	fgfr1a	1209	602	-1	80	cenpf	666	437	-0.6
81	acvr1l	1372	655	-1	81	ak9	407	284	-0.5
82	fgf8a	666	331	-1	82	pcm1	417	281	-0.5
83	ogt.1	311	154	-1	83	znf703	1670	1113	-0.5
84	ttc9c	406	207	-0.9	84	ccdc151	1766	1294	-0.4
85	flr	596	306	-0.9	85	ttc25	1141	862	-0.4
86	ccdc40	620	376	-0.7	86	chd	655	491	-0.4
87	nphp4	1701	1055	-0.6	87	fgf2	10	7	-0.4
88	cx43.4	17076	11004	-0.6	88	lamb1a	480	352	-0.4
89	sept7b	726	496	-0.5	89	zbbx	360	290	-0.3
90	amotl2a	912	644	-0.4	90	ugdh	1704	1320	-0.3
91	stk36	268	201	-0.4	91	prickle2b	214	164	-0.3
92	itgav	58	41	-0.4	92	ier2	1262	980	-0.3
93	camk2g1	144	116	-0.3	93	acvr1l	1372	1163	-0.2
94	ugdh	1704	1307	-0.3	94	nde1	414	364	-0.1
95	gmnn	733	674	-0.1	95	cluap1	635	571	-0.1
96	inpp5e	328	309	0	96	vangl2	3007	2747	-0.1
97	ocrl	153	161	0	97	tcp1	965	868	-0.1
98	cfl1	1538	1494	0	98	daw1	1997	1984	0
99	znf703	1670	1637	0	99	bbs1	367	372	0
100	dzip1	188	202	0	100	ccdc40	620	703	0.1
101	prickle1a	892	958	0.1	101	rer1	1641	1761	0.1
102	chd	655	739	0.1	102	atp6v1f	540	618	0.1
103	tp53	2546	3116	0.2	103	cnpy1	566	677	0.2
104	gpc4	134	162	0.2	104	sept7b	726	883	0.2
105	fgf2	10	14	0.4	105	poc1b	366	460	0.3
106	prickle2b	214	313	0.5	106	unc119.1	1723	2161	0.3
107	nudc	922	1371	0.5	107	tdp2b	100	128	0.3
108	lamb1a	480	893	0.8	108	stk36	268	363	0.4
109	tdgf1	195	354	0.8	109	itgav	58	78	0.4
110	mcamb	1138	1981	0.8	110	rab11a	636	882	0.4
111	dicer1	65	125	0.9	111	fgf8a	666	954	0.5
112	rab11a	636	1272	0.9	112	ogt.1	311	447	0.5
113	rbp7a	24	46	0.9	113	ttc4	640	1031	0.6
114	rer1	1641	3357	1	114	tp53	2546	4124	0.6
115	ier2	1262	3249	1.3	115	nudc	922	1489	0.6
116	rock2b	6	19	1.5	116	gdf3	171	262	0.6
117	efnb2b	30	101	1.6	117	flr	596	1097	0.8
118	atp6v1f	540	1653	1.6	118	dzip1	188	342	0.8
119	sdc2	70	245	1.7	119	pard3	160	302	0.9
120	plk4	4	17	1.9	120	tdgf1	195	476	1.2
121	tdp2b	100	495	2.2	121	mcamb	1138	2827	1.3
122	wdr18	37	204	2.4	122	rbp7a	24	64	1.3
123	ofd1	9	56	2.5	123	gpc4	134	401	1.5
124	atp1a2a	7	48	2.6	124	sirt2	20	69	1.7
125	atp6v0d1	27	174	2.7	125	atr	93	341	1.8
126	tcp1	965	7321	2.9	126	atp6v0d1	27	138	2.3
127	dld	23	308	3.6	127	wdr18	37	259	2.7
128	gdf3	171	2833	4	128	dld	23	164	2.7
129	enc3	1	39	4.7	129	ofd1	9	76	3
130	fgf24	18	611	5	130	sdc2	70	677	3.2
131	snx10a	1	158	6.3	131	camk2b2	2	23	3.4
132	klf8	2	358	7.2	132	enc3	1	22	3.9
133	unc119b	1	315	7.7	133	rock2b	6	616	6.5
134	lft2	1	443	8.2	134	snx10a	1	353	7.5
	Genes that are not differentially expressed (|log2FoldChange| <1 and/or adjusted p-value ≥0,05) are indicated in red.
	Counts in the table (for control and knockdown - KD) are the normalized counts from DESeq
