# Supplementary material for: TEADs, Yap, Taz, Vgll4s transcription factors control the establishment of Left-Right asymmetry in zebrafish
Source: eLife journal article supplement (doi:10.7554/elife.45241), 2019-09-12
Supplement: supp [file elife-45241-supp-v1.zip › elife_poa_e45241_Supplementary_file_4.xlsx]

## Sheet: Feuil1
	Differential expression of genes coding for proteins involved in ciliogenesis and known to be required for proper function of the LRO
	Gene symbol	Ctrl	vgll4l KD	Vgll4l vs Ctrl log2 fold change			Gene symbol	Ctrl	Yap/Taz KD	Yap/Taz vs Ctrl log2 fold change
1	aftphb	156	0	-8.2		1	aftphb	156	0	-9.7
2	lace1b	474	2	-7.8		2	abcc4	184	0	-9.3
3	abcc4	184	0	-7.5		3	lace1b	474	0	-9.1
4	ttc39c	370	2	-7.4		4	fto	52	0	-6.3
5	bbs2	298	1	-7.2		5	arhgef18b	2308	35	-6
6	lrrc6	1602	11	-6.9		6	enpp2	9	0	-5.7
7	ttll3	25	0	-6.9		7	lpar3	9	0	-5.7
8	arhgef11	1377	14	-6.4		8	dnah7l	964	21	-5.4
9	dnah7l	964	11	-6.4		9	ttll3	25	0	-5.3
10	daw1	1997	26	-6		10	lrrc6	1602	44	-5
11	fzd2	125	2	-5.8		11	inpp5e	328	12	-4.6
12	arl6	440	7	-5.7		12	rpgrb	519	52	-3.2
13	lpar3	9	0	-5.4		13	bbs7	1089	115	-3.2
14	bbs9	82	2	-4.9		14	tp53bp2b	692	79	-3.1
15	enpp2	9	0	-4.8		15	ttc39c	370	51	-2.8
16	spa17	1669	68	-4.5		16	bbs9	82	11	-2.7
17	fto	52	2	-4.1		17	arhgef11	1377	218	-2.6
18	bbs7	1089	65	-4		18	ocrl	153	26	-2.5
19	ahi1	795	47	-4		19	fgfr2	98	16	-2.5
20	sirt2	20	1	-4		20	bbs2	298	54	-2.4
21	dnaaf1	1097	70	-3.9		21	foxj1a	22546	5205	-2.1
22	ccdc151	1766	122	-3.8		22	ttc9c	406	100	-2
23	bbs1	367	30	-3.5		23	fzd2	125	31	-1.9
24	arhgef18b	2308	214	-3.4		24	cdc14aa	1214	394	-1.6
25	cdc14b	610	56	-3.4		25	cfap53	1711	539	-1.6
26	ttc26	1898	265	-2.8		26	bbip1	415	153	-1.4
27	poc1b	366	52	-2.7		27	llgl2	2003	749	-1.4
28	rpgrb	519	83	-2.6		28	ahi1	795	287	-1.4
29	tp53bp2b	692	121	-2.5		29	bbs4	4	2	-1.2
30	zbbx	360	60	-2.5		30	dnaaf1	1097	450	-1.2
31	fgfr2	98	18	-2.4		31	spa17	1669	688	-1.2
32	foxj1a	22546	4299	-2.3		32	cep290	227	100	-1.1
33	cfap53	1711	332	-2.3		33	ttc26	1898	1000	-0.9
34	ttc25	1141	254	-2.1		34	cdc14b	610	321	-0.9
35	cluap1	635	140	-2.1		35	gmnn	733	431	-0.7
36	ak9	407	94	-2.1		36	arl6	440	268	-0.7
37	bbs4	4	1	-2		37	pcm1	417	281	-0.5
38	unc119.1	1723	456	-1.9		38	ak9	407	284	-0.5
39	vangl2	3007	901	-1.7		39	lamb1a	480	352	-0.4
40	llgl2	2003	628	-1.6		40	ttc25	1141	862	-0.4
41	cdc14aa	1214	373	-1.6		41	ccdc151	1766	1294	-0.4
42	pcm1	417	154	-1.4		42	ier2	1262	980	-0.3
43	bbip1	415	150	-1.4		43	zbbx	360	290	-0.3
44	ttc4	640	251	-1.3		44	vangl2	3007	2747	-0.1
45	cep290	227	90	-1.3		45	cluap1	635	571	-0.1
46	fgf8a	666	331	-1		46	bbs1	367	372	0
47	flr	596	306	-0.9		47	daw1	1997	1984	0
48	ttc9c	406	207	-0.9		48	rer1	1641	1761	0.1
49	ccdc40	620	376	-0.7		49	ccdc40	620	703	0.1
50	gmnn	733	674	-0.1		50	unc119.1	1723	2161	0.3
51	inpp5e	328	309	0		51	poc1b	366	460	0.3
52	dzip1	188	202	0		52	fgf8a	666	954	0.5
53	ocrl	153	161	0		53	ttc4	640	1031	0.6
54	lamb1a	480	893	0.8		54	dzip1	188	342	0.8
55	rer1	1641	3357	1		55	flr	596	1097	0.8
56	ier2	1262	3249	1.3		56	sirt2	20	69	1.7
57	rock2b	6	19	1.5		57	atp6v0d1	27	138	2.3
58	ofd1	9	56	2.5		58	dld	23	164	2.7
59	atp6v0d1	27	174	2.7		59	ofd1	9	76	3
60	dld	23	308	3.6		60	rock2b	6	616	6.5
61	snx10a	1	158	6.3		61	snx10a	1	353	7.5
	Genes that are not differentially expressed (|log2FoldChange| <1 and/or adjusted p-value ≥0,05) are indicated in red.
	Genes involved in ciliogenesis but absent in DFCs of control embryo (<1 normalized count) have been disregarded.
	Counts in the table (for control and knockdown - KD) are the normalized counts from DESeq
