# Supplementary material for: TEADs, Yap, Taz, Vgll4s transcription factors control the establishment of Left-Right asymmetry in zebrafish
Source: eLife journal article supplement (doi:10.7554/elife.45241), 2019-09-12
Supplement: supp [file elife-45241-supp-v1.zip › elife_poa_e45241_Supplementary_file_5.xlsx]

## Sheet: Sheet1
gene	target sequence	sgRNA primer F	sgRNA primer R	Screening primer F	screening primer R
vgll4l	TAGGGCATGCGCACTCTGTCGC	TAGGGCATGCGCACTCTGTCGC	AAACGCGACAGAGTGCGCATGC	AACTGAAGTCACACGCTCATCT	TTACCTCTCCTCAAGCGTCC
vgll4b	GGGGCCGCCATGCGCTCGAT	TAGGGGCCGCCATGCGCTCGAT	AAACATCGAGCGCATGGCGGCC	TTGTCCCATGCCTACTCACT	AGATGATGCCCACCAACCAG
yap	GGGGGCAGCGGCATGTCATC	TAGGGGGCAGCGGCATGTCATC	AAACGATGACATGCCGCTGCCC	AAACGCCCCACCTCAGC	TATCTCTGTCCCGAAGGGGT
taz	GGGCCGCTCACGGAGCCCGC	TAGGGCCGCTCACGGAGCCCGC	AAACGCGGGCTCCGTGAGCGGC	CTTTCGCTCGCGCTCATCT	AGTGTGCAGGAATGTCCAGTAAT
tead3a				ACCTTCGCACTCACATAAATTC	ACTTGATATGGGTGGAGGCTG
