# Supplementary material for: TEADs, Yap, Taz, Vgll4s transcription factors control the establishment of Left-Right asymmetry in zebrafish
Source: eLife journal article supplement (doi:10.7554/elife.45241), 2019-09-12

**Supplementary file 6:** Position of MO (black), ASO (blue) target sequences and of mutations (red) in *vgll4l*, *vgll4b*, *yap*, *taz*, *tead1a* and *tead3a* genes (the size of introns has not been respected).

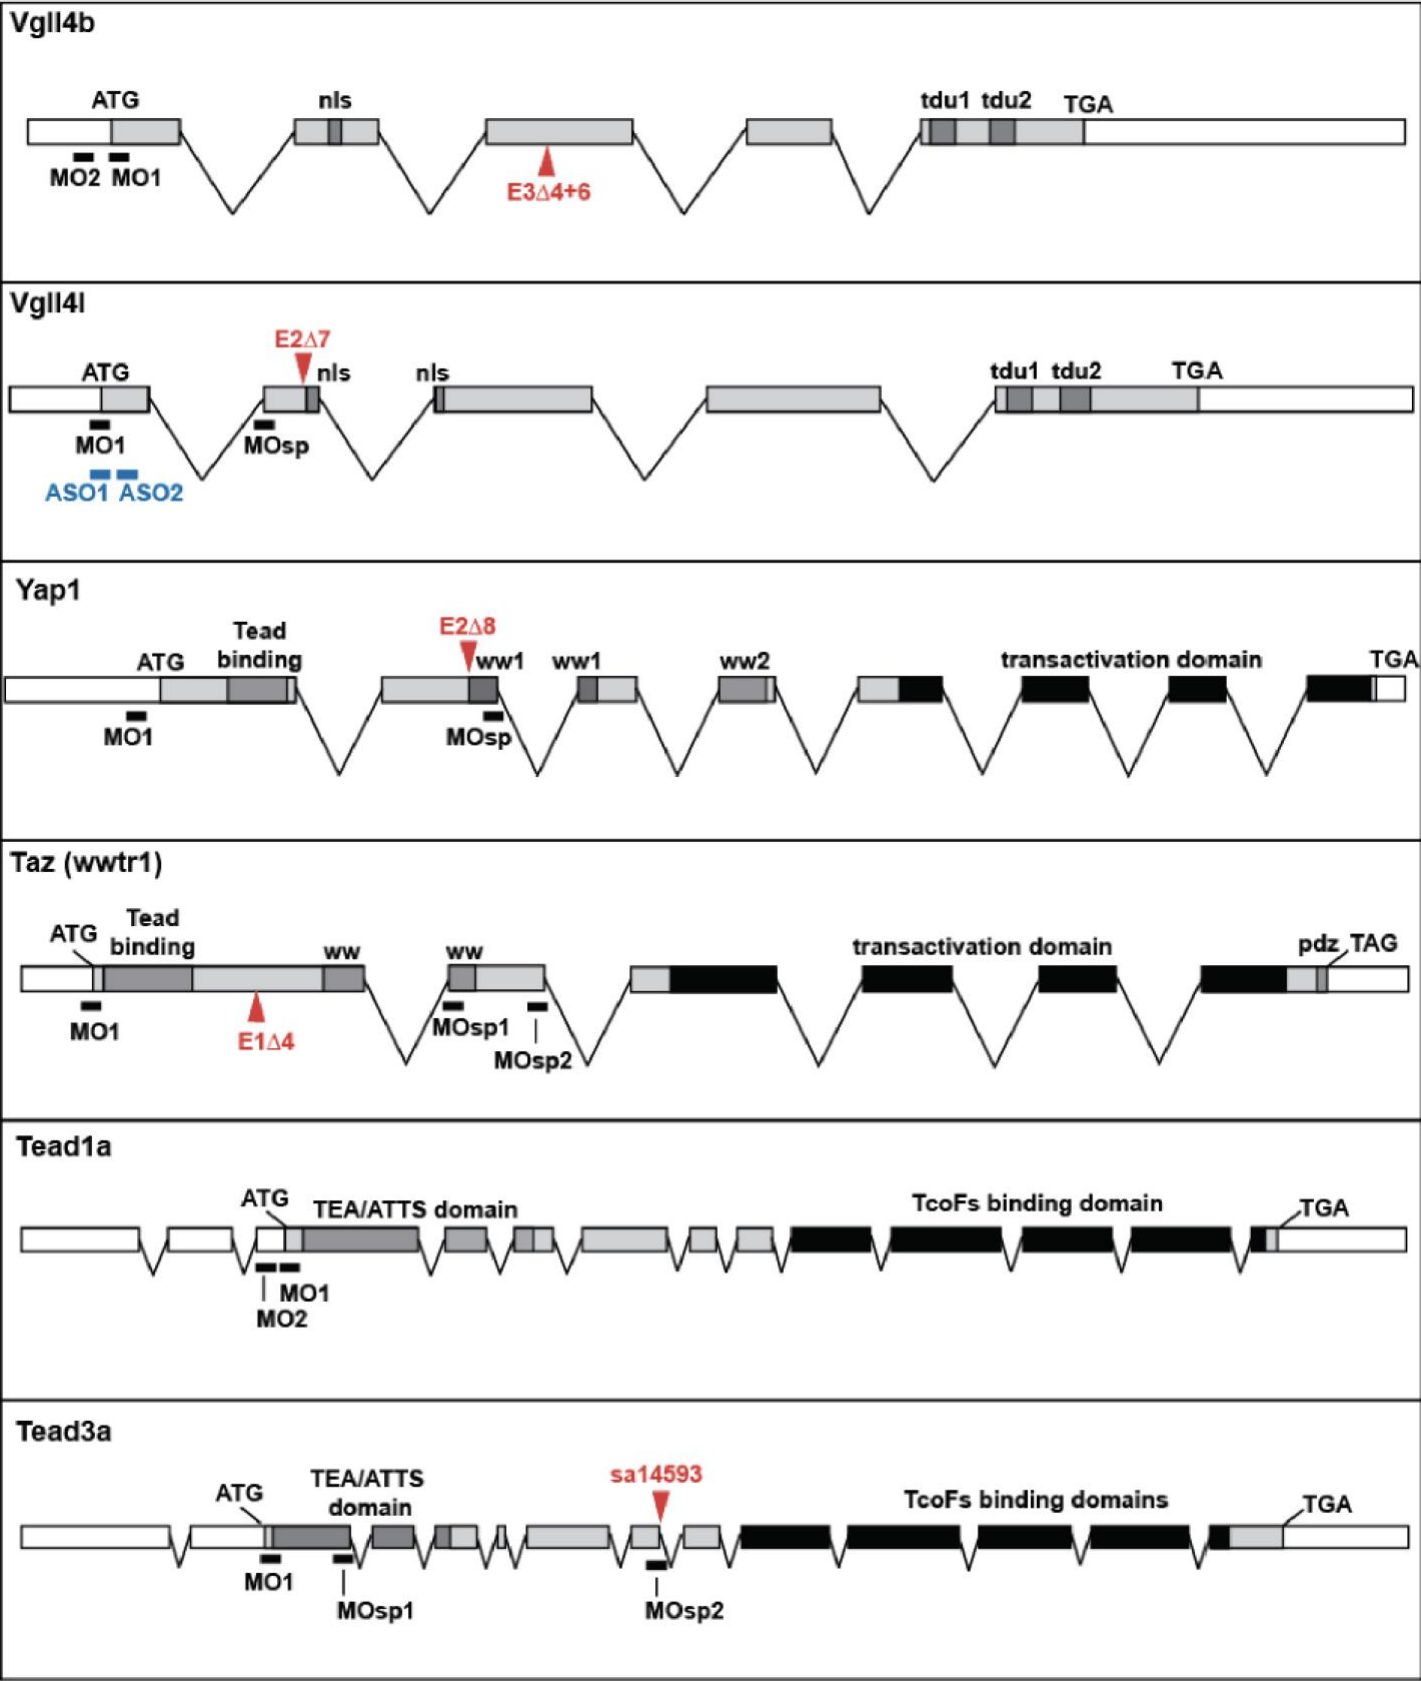

Supplement: supp [file elife-45241-supp-v1.zip › elife_poa_e45241_Supplementary_file_6.pdf]
