# Supplementary material for: TEADs, Yap, Taz, Vgll4s transcription factors control the establishment of Left-Right asymmetry in zebrafish
Source: eLife journal article supplement (doi:10.7554/elife.45241), 2019-09-12
Supplement: supp [file elife-45241-supp-v1.zip › elife_poa_e45241_Supplementary_file_7.pdf]

**Supplementary File 7: Sequence of Vgll4l, Vgll4b, Yap, Taz, and Tead3a mutants.**

**Vgll141 E2 (Δ7)**

WT open reading frame is underlined. Aminoacids coded by another coding frame after the mutation site are in *red* italics.

**WT** TGTGCGTTGAAGATTCAGGAATGGCGGTCCTAATTTCCACTACATAACCAGGATGAGCA 120  
|||||  
**Vgll141 E2Δ7** TGTGCGTTGAAGATTCAGGAATGGCGGTCCTAATTTCCACTACATAACCAGGATGAGCA 120  
C A L K I Q E W R S L I S T T \* P G \* A  
V R \* R F R N G G H \* F P L H N Q D E Q  
C V E D S G M A V T N F H Y I T R M S S

**WT** GTGGTTTCAAAGTATACATCTTAGAGGGACAGCCCAATCTGAGGAGCGAAGACAGATTCC 180  
|||||  
**Vgll141 E2Δ7** GTGGTTTCAAAGTATACATCTTAGAGGGACAGCCCAATCTGAGGAGCGAAGACAGATTCC 180  
V V S K Y T S \* R D S P I \* G A K T D S  
W F Q S I H L R G T A Q S E E R R Q I P  
G F K V Y I L E G Q P N L R S E D R F R

**WT** GGCACATGACCAGCGACAGAGTGCGCATGCGCCCGCACACCCCATGAAGCGCAAGCACA 240  
|||||  
**Vgll141 E2Δ7** GGCACAT-----GACAGAGTGCGCATGCGCCCGCACACCCCATGAAGCGCAAGCACA 233  
G T \* A H A P R T P H E A Q A Q A Q  
A H R V R M R P A H P M K R K H S  
H M *T E C A C A P H T P \* S A S T*

**peptide**

**WT** MAVTNFHYITRMSSGFKVYILEGQPNLRSEDRFRHMTSDRVRMRPAHPMKRKHSSDRGRT 60  
|||||  
**Vgll141 E2Δ7** MAVTNFHYITRMSSGFKVYILEGQPNLRSEDRFRHM*TECACAPHTP*  
  
**WT** LEERRERALSCKVANSARRSSGFSIPESPTSTWSPTASPTHLPSPVFSSPVMDEPLALI 120  
  
**WT** KKPRPEPEKTESQNKATTQIQMRPSVITCVSSASRSTKQDCCNHSTAVSKHSYDHVEEHF 180  
  
**WT** QRS LGIN YHRATSI SVSVDDHFAKALGDKWLQLKASSSSCHSSSSSSSSSPSSPTFIHS 240  
  
**WT** PGYSPKRARKDSSSPTTTTPNFWSKD 266

### Vg114b E3(Δ4+6)

WT open reading frame is underlined. Aminoacids coded by another coding frame after the mutation site are in *red* italics.

|               |                                                                                                                                                                                                                            |     |
|---------------|----------------------------------------------------------------------------------------------------------------------------------------------------------------------------------------------------------------------------|-----|
| WT            | CTTTCGCGATTAAAAAGTCCATAA <b>ATG</b> CTTTTTTACCAAAATGGACCTGTTGAACTACCAG                                                                                                                                                     | 180 |
| Vg114b E3Δ4+6 | CTTTCGCGATTAAAAAGTCCATAAATGCTTTTTTACCAAAATGGACCTGTTGAACTACCAG<br>L S A I K S P * <u>M L F T K M D L L N Y Q</u><br>F L R L K V H K C F L P K W T C * T T S<br>F C D * K S I N A F Y Q N G P V E L P V                      | 180 |
| WT            | TACTTGGACAAAATGAACAACAACATCGGCATCCTGTGCTACGAAGGAGATGCGGCTCTG                                                                                                                                                               | 240 |
| Vg114b E3Δ4+6 | TACTTGGACAAAATGAACAACAACATCGGCATCCTGTGCTACGAAGGAGATGCGGCTCTG<br>Y <u>L D K M N N N I G I L C Y E G D A A L</u><br>T W T K * T T T S A S C A T K E M R L *<br>L G Q N E Q Q H R H P V L R R R C G S E                       | 240 |
| WT            | AGAGGCGAGTCCAGAATGCAGTCTCTGTCGTCTGCAGTCAGCAACCACCGGACCGGCCCT                                                                                                                                                               | 300 |
| Vg114b E3Δ4+6 | AGAGGCGAGTCCAGAATGCAGTCTCTGTCGTCTGCAGTCAGCAACCACCGGACCGGCCCT<br><u>R G E S R M Q S L S S A V S N H R T G P</u><br>E A S P E C S L C R L Q S A T T G P A L<br>R R V Q N A V S V V C S Q Q P P D R P S                       | 300 |
| WT            | CCTCCCATCAGCCCCAGCAAGAGGAAACACAGCGCGGAGCAAGCAGACGACGACATCGAC                                                                                                                                                               | 360 |
| Vg114b E3Δ4+6 | CCTCCCATCAGCCCCAGCAAGAGGAAACACAGCGCGGAGCAAGCAGACGACGACATCGAC<br><u>P P I S P S K R K H S A E Q A D D D I D</u><br>L P S A P A R G N T A R S K Q T T T S T<br>S H Q P Q Q E E T Q R G A S R R R H R L                       | 360 |
| WT            | TGCAACAGTGAGCATGTGGCCAAGATGAGCCGCCTGTTCGCCGCACAGCTAGGAAAGCCT                                                                                                                                                               | 420 |
| Vg114b E3Δ4+6 | TGCAACAGTGAGCATGTGGCCAAGATGAGCCGCCTGTTCGCCGCACAGCTAGGAAAGCCT<br><u>C N S E H V A K M S R L F A A Q L G K P</u><br>A T V S M W P R * A A C S P H S * E S L<br>Q Q * A C G Q D E P P V R R T A R K A C                       | 420 |
| WT            | GCCAACGGGGACTACCGCAAGGACCCCCGGGAGCGCAGCCGACGCCCATC <b>GAGC</b> --GCA                                                                                                                                                       | 478 |
| Vg114b E3Δ4+6 | GCCAACGGGGACTACCGCAAGGACCTCCGGGAGCGCAGCCGACGCCCATC <b>ATCCCA</b> GCA<br><u>A N G D Y R K D L R E R S R S P I</u> <i>I P A</i><br>P T G T T A R T S G S A A A A P S S Q H<br>Q R G L P Q G P P G A Q P Q P H H P S <u>M</u> | 480 |
| WT            | TGGCGGCCCCAGCATGAGTCTGGTTGGTGGGCATCATCTCTACATGCCCAGCCTGGCCC                                                                                                                                                                | 538 |
| Vg114b E3Δ4+6 | TGGCGGCCCCAGCATGAGTCTGGTTGGTGGGCATCATCTCTACATGCCCAGCCTGGCCC<br><i>W R P P A</i> * V W L V G I I S T C P A W P<br>G G P Q H E S G W W A S S L H A Q P G P<br><u>A A P S M S L V G G H H L Y M P S L A L</u>                 | 540 |

### Peptide

|               |                                                                  |     |
|---------------|------------------------------------------------------------------|-----|
| WT            | MLFTKMDLLNYQYLDKMNNNIGILCYEGDAALRGESRMQSLSSAVSNHRTGPPPIPSKR      | 60  |
| Vg114b E3Δ4+6 | MLFTKMDLLNYQYLDKMNNNIGILCYEGDAALRGESRMQSLSSAVSNHRTGPPPIPSKR      | 60  |
| WT            | KHSAEQADDDIDCNSEHVAKMSRLFAAQLGKPANGDYRKDPRERSRSPIERMAAPMSLV      | 120 |
| Vg114b E3Δ4+6 | KHSAEQADDDIDCNSEHVAKMSRLFAAQLGKPANGDYRKDLRERSRSP <i>IPAWRPPA</i> |     |
| WT            | GGHHLYMPSLALDQPLALTKNMDSSRSMGISPTASPVERQQNRPSVITCAPANNRNCNLS     | 180 |
| WT            | HCTGSHNGCSPGLNASYRRASNSNTACDPVIEEHFRRLGKNYKEPEFVTNSVSITGSVD      | 240 |
| WT            | DHFAKALGETWLQIKAKGSSSPDASPNTHMVNHNHSPSLVS                        | 282 |



### Yap E3 (Δ8)

WT open reading frame is underlined. Aminoacids coded by another coding frame after the mutation site are in *red* italics.

|          |                                                                                                                                                                                                                                                                    |     |
|----------|--------------------------------------------------------------------------------------------------------------------------------------------------------------------------------------------------------------------------------------------------------------------|-----|
| WT       | TTCAGTTGGATAGAAAGAAGAGTTTACTTTTATCTGGAGTCATGGATCCGAACCAGCACAAACCTCCAGCCGGCCACCA                                                                                                                                                                                    | 440 |
| Yap E3Δ8 | TTCAGTTGGATAGAAAGAAGAGTTTACTTTTATCTGGAGTCATGGATCCGAACCAGCACAAACCTCCAGCCGGCCACCA<br>F S W I E R R V L L L S G V <u>M D P N Q H N P P A G H Q</u><br>S V G * K E E F Y F Y L E S W I R T S T T L Q P A T R<br>Q L D R K K S F T F I W S H G S E P A Q P S S R P P    | 440 |
| WT       | GATCGTCCATGTTTCGGGGAGACTCCGAGACCGATCTGGAGGCTCTTTTAAACGCTGTGATGAACCCGAAAAACACCATCG                                                                                                                                                                                  | 520 |
| Yap E3Δ8 | GATCGTCCATGTTTCGGGGAGACTCCGAGACCGATCTGGAGGCTCTTTTAAACGCTGTGATGAACCCGAAAAACACCATCG<br><u>I V H V R G D S E T D L E A L F N A V M N P K N T I V</u><br>S S M F G E T P R P I W R L F L T L * * T R K T P S<br>D R P C S G R L R D R S G G S F * R C D E P E K H R    | 520 |
| WT       | TCCCCCTTCCGTGCCGATGAGGTTGAGAAAGCTGCCAGACTCATTTCTCACGCCGCCAGAGCCAAAGTCCCACTCCAGA                                                                                                                                                                                    | 600 |
| Yap E3Δ8 | TCCCCCTTCCGTGCCGATGAGGTTGAGAAAGCTGCCAGACTCATTTCTCACGCCGCCAGAGCCAAAGTCCCACTCCAGA<br><u>P P S V P M R L R K L P D S F F T P P E P K S H S R</u><br>S P L P C R * G * E S C Q T H S S R R Q S Q S P T P D<br>P P F R A D E V E K A A R L I L H A A R A K V P L Q T    | 600 |
| WT       | CAAGCCAGTACAGATGCAGGTACTGCTGGTACCGTCACGCCCCATCACGTCCGGGCACACTCCTCACCTGCCTCCCTGCA                                                                                                                                                                                   | 680 |
| Yap E3Δ8 | CAAGCCAGTACAGATGCAGGTACTGCTGGTACCGTCACGCCCCATCACGTCCGGGCACACTCCTCACCTGCCTCCCTGCA<br><u>Q A S T D A G T A G T V T P H H V R A H S S P A S L Q</u><br>K P V Q M Q V L L V P S R P I T S G H T P H L P P C S<br>S Q Y R C R Y C W Y R H A P S R P G T L L T C L P A   | 680 |
| WT       | GCTGGGCGCAGTTTCTCCTGGTGCACTGACCAGCATGGGTCCAGCAAACGCCCCACCTCAGCACCTCCGCCAGTCCTCTT                                                                                                                                                                                   | 760 |
| Yap E3Δ8 | GCTGGGCGCAGTTTCTCCTGGTGCACTGACCAGCATGGGTCCAGCAAACGCCCCACCTCAGCACCTCCGCCAGTCCTCTT<br><u>L G A V S P G A L T S M G P A N A P P Q H L R Q S S Y</u><br>W A Q F L L V H * P A W V Q Q T P H L S T S A S P L<br>A G R S F S W C T D Q H G S S K R P T S A P P P V L L   | 760 |
| WT       | ACGAGATACCTGA <b>TGACATGC</b> CGCTGCCCCAGGCTGGGAGATGGCCAAGACCCCTTCGGGACAGAGATACTTCCTAAACCATAA                                                                                                                                                                      | 847 |
| Yap E3Δ8 | ACGAGATACCTGA-----CGCTGCCCCAGGCTGGGAGATGGCCAAGACCCCTTCGGGACAGAGATACTTCCTAAACCATAA<br><u>E I P D</u> <i>A A P R L G D G Q D P F G T E I L P K P *</i><br>T R Y L T L P P G W E M A K T P S G Q R Y F L N H N<br>R D T * R C P Q A G R W P R P L R D R D T S * T I M | 847 |

### Peptide

|          |                                                               |     |
|----------|---------------------------------------------------------------|-----|
| WT       | MDPNQHNPAGHQIVHVRGDSETDLEALFNAVMPKNTIVPPSVPMRLRKLPDSFFTPPE    | 60  |
| Yap E3Δ8 | MDPNQHNPAGHQIVHVRGDSETDLEALFNAVMPKNTIVPPSVPMRLRKLPDSFFTPPE    | 60  |
| WT       | PKSHSRQASTDAGTAGTVTPHHVRAHSSPASLQLGAVSPGALTSMGPANAPPQHRLRQSSY | 120 |
| Yap E3Δ8 | PKSHSRQASTDAGTAGTVTPHHVRAHSSPASLQLGAVSPGALTSMGPANAPPQHRLRQSSY | 120 |
| WT       | EIPDDMPLPPGWEMAKTPSGQRYFLNHNDQTTWQDPRKALLQMNQAAPASPVVQQQNI    | 180 |
| Yap E3Δ8 | EIPD <i>AAPRLGDGQDPFGTEILPKP</i>                              |     |
| WT       | MNPASGPLPDGWEQAITSEGEIYYINHKNKTTSWLDPRLDPRFAMNQQRISQSAPVKQGS  | 240 |
| WT       | QLPSSPQSGVMGNNPIRLQQIHIEKERLRIQELLRQRPQELALRNQLPTSMEQDGGTQ    | 300 |
| WT       | NPVSSPGMGQDARNMTTNSSDPFLNSGTYHSRDESTDGLSMSSYSVPRTPDDFLNSVDE   | 360 |
| WT       | METGDTLGP GSMATQPSRFPDYDLAIPGTDVDLGTLEGESMAVEGEELMPSLQEALSSDI | 420 |
| WT       | LNDMESVLAATKIDKENFLTWL                                        | 442 |



### TAZ E1 (Δ4)

WT open reading frame is underlined. Aminoacids coded by another coding frame after the mutation site are in *red* italics.

|          |                                                                                                                                                                                                      |     |
|----------|------------------------------------------------------------------------------------------------------------------------------------------------------------------------------------------------------|-----|
| WT       | CAAACACTTTTCAACTCGGCTGAAACTACTTAAGGACGAAAAACAGGAAAAGTTCCTACA                                                                                                                                         | 60  |
| Taz E1Δ4 | CAAACACTTTTCAACTCGGCTGAAACTACTTAAGGACGAAAAACAGGAAAAGTTCCTACA<br>Q T L F N S A E T T * G R K T G K V P T<br>K H F S T R L K L L K D E K Q E K F L Q<br>N T F Q L G * N Y L R T K N R K S S Y R        | 60  |
| WT       | GGAAttttttttCCATCGGCCATTTTAATCGAAGTTTGTTTTGACCATGAGCGGTAATC                                                                                                                                          | 120 |
| Taz E1Δ4 | GGAATTTTTCATCGGCCATTTTAATCGAAGTTTGTTTTGACCATGAGCGGTAATC<br>G I F F S I G H F N R S L F * P * A V I<br>E F F F P S A I L I E V C F D H E R * S<br>N F F F H R P F * S K F V L T <u>M S G N P</u>      | 120 |
| WT       | CTCTCCAGCCGATACCGGGCCACCAGGTGATCCATGTCGCCAAAGACCTGGACACGGATC                                                                                                                                         | 180 |
| Taz E1Δ4 | CTCTCCAGCCGATACCGGGCCACCAGGTGATCCATGTCGCCAAAGACCTGGACACGGATC<br>L S S R Y R A T R * S M S P K T W T R I<br>S P A D T G P P G D P C R Q R P G H G S<br><u>L Q P I P G H Q V I H V A K D L D T D L</u> | 180 |
| WT       | TGGAGGCTCTTTTAACTCGGTTCATGAACCCGAAACCGAGCTCCTGGAGGAACAAGGATA                                                                                                                                         | 240 |
| Taz E1Δ4 | TGGAGGCTCTTTTAACTCGGTTCATGAACCCGAAACCGAGCTCCTGGAGGAACAAGGATA<br>W R L F L T R S * T R N R A P G G T R I<br>G G S F * L G H E P E T E L L E E Q G Y<br><u>E A L F N S V M N P K P S S W R N K D M</u> | 240 |
| WT       | TGCCGAGTCTTTCTTCCAGGAGCCGACTCGGGCTCCCACTCCCGGCAGTCCAGCGCGG                                                                                                                                           | 300 |
| Taz E1Δ4 | TGCCGAGTCTTTCTTCCAGGAGCCGACTCGGGCTCCCACTCCCGGCAGTCCAGCGCGG<br>C R S L S S R S R T R A P T P G S P A R<br>A A V F L P G A G L G L P L P A V Q R G<br><u>P Q S F F Q E P D S G S H S R Q S S A D</u>   | 300 |
| WT       | ATTCGGTTCTCTCCCGCCGAGGGTCCACTTTCGCTCGCGCTCATCTCCGGCGTCCCTAC                                                                                                                                          | 360 |
| Taz E1Δ4 | ATTCGGTTCTCTCCCGCCGAGGGTCCACTTTCGCTCGCGCTCATCTCCGGCGTCCCTAC<br>I P V L S R R G S T F A R A H L R R P Y<br>F R F S P A E G P L S L A L I S G V P T<br><u>S G S L P P R V H F R S R S S P A S L Q</u>  | 360 |
| WT       | AGCTGCGCGGGCTCCGTGAGCGGCCCCGAGCCCCGGGAGACTCCACTCCCACACCCGGC                                                                                                                                          | 420 |
| Taz E1Δ4 | AG----CGGCGGGCTCCGTGAGCGGCCCCGAGCCCCGGGAGACTCCACTCCCACACCCGGC<br>S G G L R E R P E P R E T P L P H P A<br>A <u>A G S V S G P S P G R L H S H T R H</u><br><i>R R A P *</i> A A R A P G D S T P T P G | 416 |

### Peptide

|          |                                                              |     |
|----------|--------------------------------------------------------------|-----|
| WT       | MSGNPLQPIPGHQVIHVAKDLDTDLEALFNSVMNPKPSSWRNKDMPQSFFQEPDSGSHSR | 60  |
| TAZ E1Δ4 | MSGNPLQPIPGHQVIHVAKDLDTDLEALFNSVMNPKPSSWRNKDMPQSFFQEPDSGSHSR | 60  |
| WT       | QSSADSGSLPPRVHFRSRSSPASLQLPAGSVSGPSPGRLHSHTRHQSCDVAEELPLPPGW | 120 |
| TAZ E1Δ4 | QSSADSGSLPPRVHFRSRSSPASLQRRAP                                | 120 |
| WT       | EMAFTPNGQKYFLNHIEKITTTWHDPKSMTPSVAQLSLHNQVSNTASIQQRSMALSQPNL | 180 |
| WT       | VLNQQAHQQQQHLQQQQQVPVQVPVQAPQQQSSQPMNLSAQQHQQKMRLQRIQMERE    | 240 |
| WT       | RIQRQEELMRQEVALRQLFMDSDNLPVAPAGSPAMSAGNMPNNSADPFLNSGPYHSR    | 300 |
| WT       | EQSTDGSLGLGCYSIPTTPEDFLNNMEDMDTGENMVPVSMNVPPQSRFPDFLDSMPGTNV | 360 |
| WT       | DLGTLEGTDLMPIINDVESVLNKSEPFLLTWL                             | 391 |

### Tead3a<sup>SA14593</sup>

WT open reading frame is underlined. Aminoacids coded by another coding frame after the mutation site are in *red* italics.

|                |                                                                                                                                                                                                      |     |
|----------------|------------------------------------------------------------------------------------------------------------------------------------------------------------------------------------------------------|-----|
| WT             | CCAGCGAGAGCCCGGAGGAGGGCCAGGAGGATGAGGTGGACGGGATGGACAAAACCGGAA                                                                                                                                         | 360 |
| Tead3a SA14593 | CCAGCGAGAGCCCGGAGGAGGGCCAGGAGGATGAGGTGGACGGGATGGACAAAACCGGAA<br>P A R A R R R A R R M R W T G W T K P E<br>Q R E P G G G P G G * G G R D G Q N R N<br>S E S P E E G Q E D E V D G M D K T G <u>M</u> | 360 |
| WT             | TGACCGGGGATGCGGAGGGCGTCTGGAGTCTTGACATTGAACAAAGCTTCCAGGAGGCTC                                                                                                                                         | 420 |
| Tead3a SA14593 | TGACCGGGGATGCGGAGGGCGTCTGGAGTCTTGACATTGAACAAAGCTTCCAGGAGGCTC<br>W T G M R R A S G V L T L N K A S R R L<br>G R G C G G R L E S * H * T K L P G G S<br><u>D G D A E G V W S P D I E Q S F Q E A L</u> | 420 |
| WT             | TGGCCATTTATCCACCCTGTGGCCGAGAAAGATCATCCTCTCAGATGAAGGAAAGATGT                                                                                                                                          | 480 |
| Tead3a SA14593 | TGGCCATTTATCCACCCTGTGGCCGAGAAAGATCATCCTCTCAGATGAAGGAAAGATGT<br>W P F I H P V A A E R S S S Q M K E R C<br>G H L S T L W P Q K D H P L R * R K D V<br><u>A I Y P P C G R R K I I L S D E G K M Y</u>  | 480 |
| WT             | ATGGTCGTAATGAATTGATAGCAAGATATATAAAGCTGCGAACTGGAAAAACACGCACAC                                                                                                                                         | 540 |
| Tead3a SA14593 | ATGGTCGTAATGAATTGATAGCAAGATATATAAAGCTGCGAACTGGAAAAACACGCACAC<br>M V V M N * * Q D I * S C E L E K H A H<br>W S * * I D S K I Y K A A N W K N T H T<br><u>G R N E L I A R Y I K L R T G K T R T R</u> | 540 |
| WT             | GGAAACAGGTATCTAGTCACATACAGGTGTTAGCAAGGAAGAAAATGCGGGAATATCAAG                                                                                                                                         | 600 |
| Tead3a SA14593 | GGAAACAGGTATCTAGTCACATACAGGTGTTAGCAAGGAAGAAAATGCGGGAATATCAAG<br>G N R Y L V T Y R C * Q G R K C G N I K<br>E T G I * S H T G V S K E E N A G I S S<br><u>K Q V S S H I Q V L A R K K M R E Y Q A</u> | 600 |
| WT             | CAGGCATAAAGGCCATGAATTTGGATCAGGCTTCAAAGACAAAGCTCTTCAGAACATGG                                                                                                                                          | 660 |
| Tead3a SA14593 | CAGGCATAAAGGCCATGAATTTGGATCAGGCTTCAAAGACAAAGCTCTTCAGAACATGG<br>Q A * R P * I W I R L Q K T K L F R T W<br>R H K G H E F G S G F K R Q S S S E H G<br><u>G I K A M N L D Q A S K D K A L Q N M A</u>  | 660 |
| WT             | CGGCTCTGTCCTCAGCTCAGATCGTGTCTGCCAGTGTGATGAAGAGTCAGCTTCCTCCTC                                                                                                                                         | 720 |
| Tead3a SA14593 | CGGCTCTGTCCTCAGCTCAGATCGTGTCTGCCAGTGTGATGAAGAGTCAGCTTCCTCCTC<br>R L C P Q L R S C L P V * * R V S F L L<br>G S V L S S D R V C Q C D E E S A S S S<br><u>A L S S A Q I V S A S V M K S Q L P P L</u> | 720 |
| WT             | TTCCTCAGCACCCATACCTCCTCCAGCCCGGTTTGGCCCGGCCCCATCCAGGACAGC                                                                                                                                            | 780 |
| Tead3a SA14593 | TTCCTCAGCACCCATACCTCCTCCAGCCCGGTTTGGCCCGGCCCCATCCAGGACAGC<br>F L S T H T L L Q P G F G P A P S Q D S<br>S S A P I P S S S P V L A R P H P R T A<br><u>P Q H P Y P P P A R F W P G P I P G Q P</u>    | 780 |
| WT             | CTGGACCTTCTCAGGACATCAAGCCCTTTGCACCGAGCCCGTACCCTACCCTTCAGCCTC                                                                                                                                         | 840 |
| Tead3a SA14593 | CTGGACCTTCTCAGGA <span style="background-color: red;">■</span> gagtatttcagaccacatttgatctaagaacagtactcctgc<br>L D L L R R E Y F R P T F D L R T V L L<br>W T F S G G S I S D P H L I * E Q Y S C      | 840 |

G P S Q *E G V F Q T H I \* S K N S T P A*

**Tead3a<sup>SA14593</sup> Peptide**

|                       |                                                              |     |
|-----------------------|--------------------------------------------------------------|-----|
| <b>WT</b>             | MDKTGMDGDAEGVWSPDIEQSFQEALAIYPPCGRRKIILSDEGKMYGRNELIARYIKLRT | 60  |
|                       |                                                              |     |
| <b>Tead3a SA14593</b> | MDKTGMDGDAEGVWSPDIEQSFQEALAIYPPCGRRKIILSDEGKMYGRNELIARYIKLRT | 60  |
| <b>WT</b>             | GKTRTRKQVSSHIQVLARKKMREYQAGIKAMNLDQASKDKALQNMAALSSAQIVSASVMK | 120 |
|                       |                                                              |     |
| <b>Tead3a SA14593</b> | GKTRTRKQVSSHIQVLARKKMREYQAGIKAMNLDQASKDKALQNMAALSSAQIVSASVMK | 120 |
| <b>WT</b>             | SQLPPLPQHYPYPPPARFWPGPIPGQPGPSQDIKPFAPSPYPTLQPPPISSYQLPAPLPP | 180 |
|                       |                                                              |     |
| <b>Tead3a SA14593</b> | SQLPPLPQHYPYPPPARFWPGPIPGQPGPSQ <i>EGVFQTHI</i>              |     |
| <b>WT</b>             | SATAVPVWQDRTIASSKLRMLEYSAFMEVQRDPDTYSKHLFVHIAQTNPSYTDPLLEAVD | 240 |
| <b>WT</b>             | IRQIYDKFPEKKGGLKELYEKGPQNAFFLVKFWADLNSSNVQDGAGSFYGVSSQYSSAEN | 300 |
| <b>WT</b>             | MTITVSTKVCSEFGKQVVEKVEYARVEGGRYVYRIHRSPMCEYMINFIHKLKHLPEKYM  | 360 |
| <b>WT</b>             | MNSVLENFTILQVVTNRDTQETLLCIAFVFEVSTSDHGAQYHVYRLVKD            | 409 |
