# Supplementary material for: TEADs, Yap, Taz, Vgll4s transcription factors control the establishment of Left-Right asymmetry in zebrafish
Source: eLife journal article supplement (doi:10.7554/elife.45241), 2019-09-12

**Supplementary file 8:** Position of MO target sequences and mutations (red) in dnmt3bb.1, dnmt3bb.2,

dnmt3ba, mbd3a and mbd3b

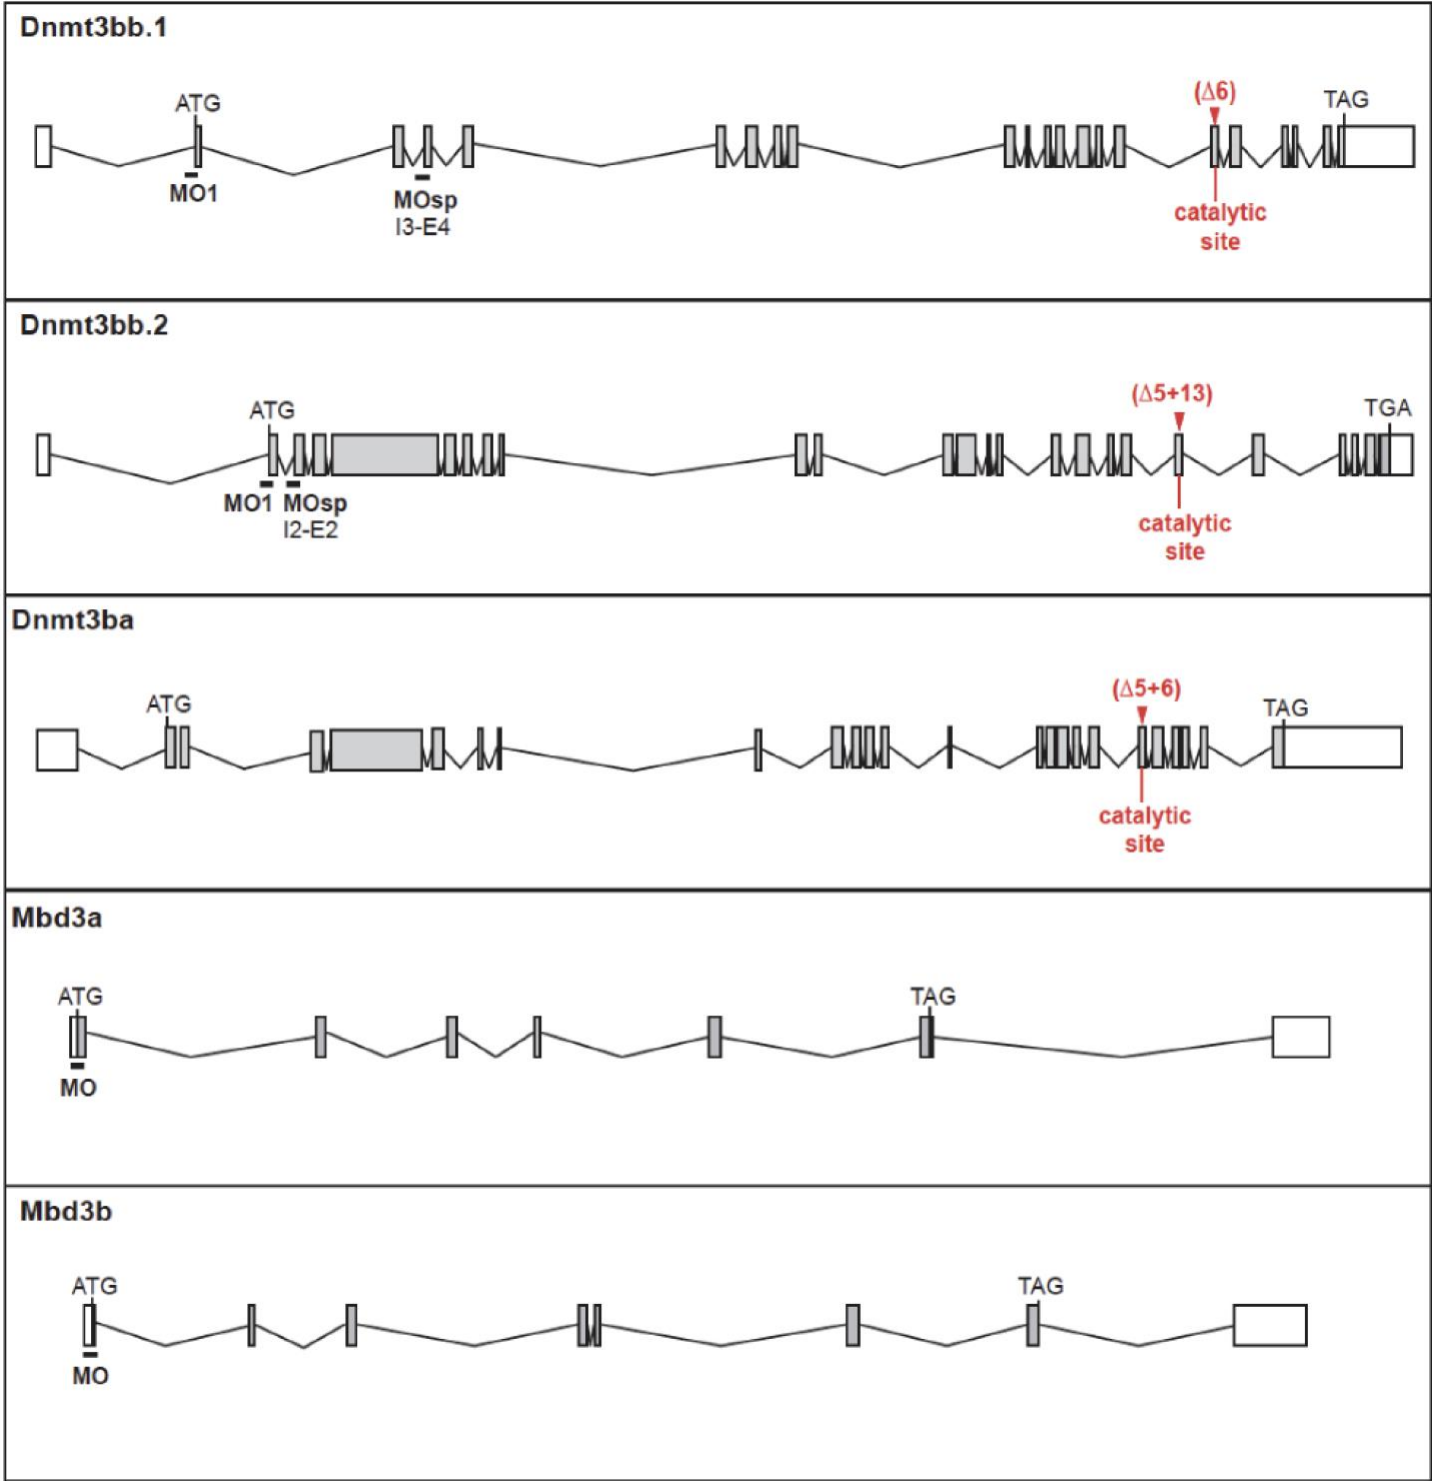

Supplement: supp [file elife-45241-supp-v1.zip › elife_poa_e45241_Supplementary_file_8.pdf]
