# Supplementary material for: TEADs, Yap, Taz, Vgll4s transcription factors control the establishment of Left-Right asymmetry in zebrafish
Source: eLife journal article supplement (doi:10.7554/elife.45241), 2019-09-12
Supplement: supp [file elife-45241-supp-v1.zip › elife_poa_e45241_Supplementary_file_9.pdf]

**Supplementary File 9:** Sequence of Dnmt3bb.1, Dnmt3bb.2 and Dnmt3ba mutants. Catalytic site is underlined. TALEN target sequences are in green. Aminoacids coded on the wrong reading frame after the mutation site are italicized and red.

| <u><b>DNMT3BB.1 E17 (Δ6)</b></u> |                                                                                |      |  |
|----------------------------------|--------------------------------------------------------------------------------|------|--|
|                                  | W G P <u>F D M V I G G S</u> <b>P C</b> N D L S I V N P A R                    |      |  |
| <b>Dnmt3bb.1</b>                 | TGGGGGCCCT <u>TTGACATGGTGATT</u> GGTGGAAGTCCCTGTAATGACCTTTCAATTGTCAACCCTGCTAGG | 1940 |  |
|                                  |                                                                                |      |  |
| <b>Dnmt3bb.1 (Δ6)</b>            | TGGGGGCCCT <u>TTGACATGGTGATT</u> GGTGGA-----TGTAATGACCTTTCAATTGTCAACCCTGCTAGG  | 1934 |  |
|                                  | W G P <u>F D M V I G G</u> C N D L S I V N P A R                               |      |  |
| Dnmt3bb.1                        | MRKEEIKKSSEIVMPSNKPSPAESDKMTATAAMNRDTSVGDGLSENDSGLEMTSENSPLT                   | 60   |  |
|                                  |                                                                                |      |  |
| Dnmt3bb.1 (Δ6)                   | MRKEEIKKSSEIVMPSNKPSPAESDKMTATAAMNRDTSVGDGLSENDSGLEMTSENSPLT                   | 60   |  |
| Dnmt3bb.1                        | PAEPPSPFCPKQNGGAASPAESVNSIRRKRSRKRSDTEEDSAWDSSNSEEKAEVSGSGCE                   | 120  |  |
|                                  |                                                                                |      |  |
| Dnmt3bb.1 (Δ6)                   | PAEPPSPFCPKQNGGAASPAESVNSIRRKRSRKRSDTEEDSAWDSSNSEEKAEVSGSGCE                   | 120  |  |
| Dnmt3bb.1                        | TGLRQRPRPRTIFQAGLTAHSPRSRERGHSHKEDHSDLVASVPEGPALELMEQDSKDSAQ                   | 180  |  |
|                                  |                                                                                |      |  |
| Dnmt3bb.1 (Δ6)                   | TGLRQRPRPRTIFQAGLTAHSPRSRERGHSHKEDHSDLVASVPEGPALELMEQDSKDSAQ                   | 180  |  |
| Dnmt3bb.1                        | SSTTSTSTTETASQPEYKDNKGFGIGELVWGKIKGFSWWPGMVVTWRATGRRQASHGMRW                   | 240  |  |
|                                  |                                                                                |      |  |
| Dnmt3bb.1 (Δ6)                   | SSTTSTSTTETASQPEYKDNKGFGIGELVWGKIKGFSWWPGMVVTWRATGRRQASHGMRW                   | 240  |  |
| Dnmt3bb.1                        | LQWFGDGKFSEVSADKLDSITAFPKFFNQSSYTKLASYRRAIFQALEVASLRAEKTFFPS                   | 300  |  |
|                                  |                                                                                |      |  |
| Dnmt3bb.1 (Δ6)                   | LQWFGDGKFSEVSADKLDSITAFPKFFNQSSYTKLASYRRAIFQALEVASLRAEKTFFPS                   | 300  |  |
| Dnmt3bb.1                        | EADSLQVQKPMLDWAHGGFLPKQGEGLPKPENAEYCVFPLASESSTLLESSPPEFPPSA                    | 360  |  |
|                                  |                                                                                |      |  |
| Dnmt3bb.1 (Δ6)                   | EADSLQVQKPMLDWAHGGFLPKQGEGLPKPENAEYCVFPLASESSTLLESSPPEFPPSA                    | 360  |  |
| Dnmt3bb.1                        | KRARLPLNKAKEGIEEVYSREQMVNEVLKNHRSIEEFCLSCGKTRVATFHPLFEGGLCLT                   | 420  |  |
|                                  |                                                                                |      |  |
| Dnmt3bb.1 (Δ6)                   | KRARLPLNKAKEGIEEVYSREQMVNEVLKNHRSIEEFCLSCGKTRVATFHPLFEGGLCLT                   | 420  |  |
| Dnmt3bb.1                        | CKDAYLENSYMYDDDGYSYCTVCCGGREMLLCGNANCCRCICVDCLDILVGAGAANSAR                    | 480  |  |
|                                  |                                                                                |      |  |
| Dnmt3bb.1 (Δ6)                   | CKDAYLENSYMYDDDGYSYCTVCCGGREMLLCGNANCCRCICVDCLDILVGAGAANSAR                    | 480  |  |
| Dnmt3bb.1                        | NLDPWRCYMCQPLQYGVLLKKRHDWSLKLQEFFFVNDSGQEFESPKIYPAPVPAEQRRPIRV                 | 540  |  |
|                                  |                                                                                |      |  |
| Dnmt3bb.1 (Δ6)                   | NLDPWRCYMCQPLQYGVLLKKRHDWSLKLQEFFFVNDSGQEFESPKIYPAPVPAEQRRPIRV                 | 540  |  |
| Dnmt3bb.1                        | LSLFDGIATGYLVLRDLGFKVDLYIASEVCEDSISVGAVRHEGKIQYVHDVNRNITRKNIA                  | 600  |  |
|                                  |                                                                                |      |  |
| Dnmt3bb.1 (Δ6)                   | LSLFDGIATGYLVLRDLGFKVDLYIASEVCEDSISVGAVRHEGKIQYVHDVNRNITRKNIA                  | 600  |  |
| Dnmt3bb.1                        | EWGPFDMVIGGS <b>PC</b> NDLSIVNPARKGLYEGTGRLFFEFYRLLSEAKPKEGEDRPFFWMFE          | 660  |  |
|                                  |                                                                                |      |  |
| Dnmt3bb.1 (Δ6)                   | EWGPFDMVIGG--CNDLSIVNPARKGLYEGTGRLFFEFYRLLSEAKPKEGEDRPFFWMFE                   | 660  |  |
| Dnmt3bb.1                        | NVAVMSVNDKRDISRFLCNPVMIDAIEVSAHRARYFWGNLPGMKRPLCASGMDKLELQ                     | 720  |  |
|                                  |                                                                                |      |  |
| Dnmt3bb.1 (Δ6)                   | NVAVMSVNDKRDISRFLCNPVMIDAIEVSAHRARYFWGNLPGMKRPLCASGMDKLELQ                     | 720  |  |
| Dnmt3bb.1                        | DCLEHGRVAKFGKVRTITTRSNSIKQKQDQHFPVMMNGKEDILWCTELERIFGFPVHYTD                   | 780  |  |
|                                  |                                                                                |      |  |
| Dnmt3bb.1 (Δ6)                   | DCLEHGRVAKFGKVRTITTRSNSIKQKQDQHFPVMMNGKEDILWCTELERIFGFPVHYTD                   | 780  |  |
| Dnmt3bb.1                        | VSNMGRGARQKLLGRSWSVPVIRHLFAPLKDYFACE                                           | 816  |  |
|                                  |                                                                                |      |  |
| Dnmt3bb.1 (Δ6)                   | VSNMGRGARQKLLGRSWSVPVIRHLFAPLKDYFACE                                           | 816  |  |

# DNMT3BB.2 E20 (Δ5+13)

|                   |                                                                                   |                           |  |
|-------------------|-----------------------------------------------------------------------------------|---------------------------|--|
|                   | W G P F D L L I G G                                                               | S P C N D L S I V N P A R |  |
| Dnmt3bb.2         | TGGGGTCCATTGATCTTCTCATTTGGTGA-----AGTCCATGTAATGACTTGTCATAGTCAATCCTGCTCGG          | 3949                      |  |
| Dnmt3bb.2 (Δ5+13) | TGGGGTCCATTGATCTTCTCATTTGGTGGAGAAGATCAATGTAA-----TGTAATGACTTGTCATAGTCAATCCTGCTCGG | 3957                      |  |
|                   | W G P F D L L I G G E D Q C N                                                     | V M T C P *               |  |

|                   |                                                                 |     |
|-------------------|-----------------------------------------------------------------|-----|
| Dnmt3bb.2         | MVADV KIGDDKQSLCELLDWLNGLLQATFSQVEDTCSGA AFCQLMDIIQPGSIDVTKVNF  | 60  |
| Dnmt3bb.2 (Δ5+13) | MVADV KIGDDKQSLCELLDWLNGLLQATFSQVEDTCSGA AFCQLMDIIQPGSIDVTKVNF  | 60  |
| Dnmt3bb.2         | TAEENLDILNNYNLLQEAFSKAQIQKELELTLLVNGDIMTTCDLLTWFKDMYDHNFAKQK    | 120 |
| Dnmt3bb.2 (Δ5+13) | TAEENLDILNNYNLLQEAFSKAQIQKELELTLLVNGDIMTTCDLLTWFKDMYDHNFAKQK    | 120 |
| Dnmt3bb.2         | CNPQVAFIKPEVSVLKSSREFETIEKENVSSLYNTEETSSNQKTQHVEKTSQESVSWSP     | 180 |
| Dnmt3bb.2 (Δ5+13) | CNPQVAFIKPEVSVLKSSREFETIEKENVSSLYNTEETSSNQKTQHVEKTSQESVSWSP     | 180 |
| Dnmt3bb.2         | TSFIRKYGSSTLTDDSEN NVNSKDCPGQKSF GDITPFWRQTPYCLYLLHGVELEDDKKAS  | 240 |
| Dnmt3bb.2 (Δ5+13) | TSFIRKYGSSTLTDDSEN NVNSKDCPGQKSF GDITPFWRQTPYCLYLLHGVELEDDKKAS  | 240 |
| Dnmt3bb.2         | VLLLGFFDKETGENKIRLLDVVYPTKESTEDICNYILDTLRKIGIPLFNMAILYSDFPDH    | 300 |
| Dnmt3bb.2 (Δ5+13) | VLLLGFFDKETGENKIRLLDVVYPTKESTEDICNYILDTLRKIGIPLFNMAILYSDFPDH    | 300 |
| Dnmt3bb.2         | EHLVAGLQLMKA EIVSLCGLTDLTGQVCHSGVEKIEFSDLI LNLITEIYKHFPSPADLQ   | 360 |
| Dnmt3bb.2 (Δ5+13) | EHLVAGLQLMKA EIVSLCGLTDLTGQVCHSGVEKIEFSDLI LNLITEIYKHFPSPADLQ   | 360 |
| Dnmt3bb.2         | ALLEDVVGSDIDNLT SQCSLFWRI IKKIPLAWSHLENYFGSLGTEEEAVCLLLEDPKIKL  | 420 |
| Dnmt3bb.2 (Δ5+13) | ALLEDVVGSDIDNLT SQCSLFWRI IKKIPLAWSHLENYFGSLGTEEEAVCLLLEDPKIKL  | 420 |
| Dnmt3bb.2         | NVLFLTHALQPLCDFQE I IDQGASVLQLLQDASKLLRLYTQSFLRPKAAEYFHRRGKTS   | 480 |
| Dnmt3bb.2 (Δ5+13) | NVLFLTHALQPLCDFQE I IDQGASVLQLLQDASKLLRLYTQSFLRPKAAEYFHRRGKTS   | 480 |
| Dnmt3bb.2         | VQETVGHLPRGEVAVGEQAADFLQQHSEELSDYLETFHSSII SFYTTVTVNIVKRLPLPD   | 540 |
| Dnmt3bb.2 (Δ5+13) | VQETVGHLPRGEVAVGEQAADFLQQHSEELSDYLETFHSSII SFYTTVTVNIVKRLPLPD   | 540 |
| Dnmt3bb.2         | STLRNLSLVLSPGKKLEVTGKMVQDLGVGFVCIRPDNVSLLTDEFLEYQLIDGGDTGSV     | 600 |
| Dnmt3bb.2 (Δ5+13) | STLRNLSLVLSPGKKLEVTGKMVQDLGVGFVCIRPDNVSLLTDEFLEYQLIDGGDTGSV     | 600 |
| Dnmt3bb.2         | DQPTEKYWQTEL RIMGNASNFGKLIVSLLALPKTLKKEI IFKQMFQQT DYLKMMRKEDCE | 660 |
| Dnmt3bb.2 (Δ5+13) | DQPTEKYWQTEL RIMGNASNFGKLIVSLLALPKTLKKEI IFKQMFQQT DYLKMMRKEDCE | 660 |
| Dnmt3bb.2         | EKDMMEDDVT DSSSYKSAPSHLSPETQGSSISDVIDLTEMDEIGPVEIEDIAPMDVDDIV   | 720 |
| Dnmt3bb.2 (Δ5+13) | EKDMMEDDVT DSSSYKSAPSHLSPETQGSSISDVIDLTEMDEIGPVEIEDIAPMDVDDIV   | 720 |
| Dnmt3bb.2         | SISSDSETENQKVNVP HVSIVLDDDDDDDEMTDDDDDYGCEAGEVMWKYSKNKGNTQNE    | 780 |
| Dnmt3bb.2 (Δ5+13) | SISSDSETENQKVNVP HVSIVLDDDDDDDEMTDDDDDYGCEAGEVMWKYSKNKGNTQNE    | 780 |
| Dnmt3bb.2         | MTDNTYQGGFSVGEMVLGPIEGFGLWPGLVQSWDSERPCGSMRKVIFFGNGMQTEVQADS    | 840 |
| Dnmt3bb.2 (Δ5+13) | MTDNTYQGGFSVGEMVLGPIEGFGLWPGLVQSWDSERPCGSMRKVIFFGNGMQTEVQADS    | 840 |
| Dnmt3bb.2         | LLPFSSSLAKCFCSNSFATVMAYKDAIFSSSLQVASRRSRMFFSPESESKDELLRVMLN WAF | 900 |
| Dnmt3bb.2 (Δ5+13) | LLPFSSSLAKCFCSNSFATVMAYKDAIFSSSLQVASRRSRMFFSPESESKDELLRVMLN WAF | 900 |
| Dnmt3bb.2         | GGFEPLGADGLQPQAEYSVKVKKGKRKNPTGKLFNLTVPLNKI PESLDLNNGSVDLGTTD   | 960 |

|                             |                                                                       |      |
|-----------------------------|-----------------------------------------------------------------------|------|
| Dnmt3bb.2 ( $\Delta 5+13$ ) | <br>GGFEPLGADGLQQA EYSVKVKKGKRKNPTGKLFNLT VPLNKIPESLDLNNGSVDLGTTD     | 960  |
| Dnmt3bb.2                   | ADKKRLYSKWNGRSMQTVKIRRK YKQRNKNI IPTVQIESRQNSQKRHQM VHEFLKNKRKI       | 1020 |
| Dnmt3bb.2 ( $\Delta 5+13$ ) | ADKKRLYSKWNGRSMQTVKIRRK YKQRNKNI IPTVQIESRQNSQKRHQM VHEFLKNKRKI       | 1020 |
| Dnmt3bb.2                   | EDFCLSCGSM SVDIIHPLFEGK LCTNCKFNF TETLYRYDE DGYQSYCTVCCSGMEVILCG      | 1080 |
| Dnmt3bb.2 ( $\Delta 5+13$ ) | EDFCLSCGSM SVDIIHPLFEGK LCTNCKFNF TETLYRYDE DGYQSYCTVCCSGMEVILCG      | 1080 |
| Dnmt3bb.2                   | HDSCCRSFCV DCLDILVCQGT F DQLKNVDPWTCYLCAPETSSGALKPRHDWSIRVQE FFA      | 1140 |
| Dnmt3bb.2 ( $\Delta 5+13$ ) | HDSCCRSFCV DCLDILVCQGT F DQLKNVDPWTCYLCAPETSSGALKPRHDWSIRVQE FFA      | 1140 |
| Dnmt3bb.2                   | NDTGMEFEP HRVYPSIPAIQRRPIRVLSLFDGIATGYLVLRDLGFKVEKYVASEIDEESI         | 1200 |
| Dnmt3bb.2 ( $\Delta 5+13$ ) | NDTGMEFEP HRVYPSIPAIQRRPIRVLSLFDGIATGYLVLRDLGFKVEKYVASEIDEESI         | 1200 |
| Dnmt3bb.2                   | TISMVNHDGKITQVDDVKNITKKHIEQWGPFDLLIGGS <b>PC</b> NDLSIVNPARKGLYEGTGRL | 1260 |
| Dnmt3bb.2 ( $\Delta 5+13$ ) | TISMVNHDGKITQVDDVKNITKKHIEQWGPFDLLIGG <u>EDCNVMTCP</u>                | 1246 |
| Dnmt3bb.2                   | FFEYYRLNLNVLKPKEDDPQPF FFWLFENVTFMQTHVKADICRFLECNPVLVDAVKVSPAHR       | 1320 |
| Dnmt3bb.2                   | ARYFWGNIPGMNRPIIASQNDKLCLQE CLEPGRTAKYEKVRTITTRQNSLQGTND AHFP         | 1380 |
| Dnmt3bb.2                   | VTMNGKDDHIWITELEKIFGF PKHYTDVKSMGRPQRQ RVLGKSWSVPVIRHLLAPLKDYF        | 1440 |
| Dnmt3bb.2                   | ACDEFPVK 1448                                                         |      |

**DNMT3Ba E20 (Δ5+6)**

|                |                                                                                 |      |
|----------------|---------------------------------------------------------------------------------|------|
|                | G P F D L L I G G S P C N D L S M V N P A R K G                                 |      |
| Dnmt3ba        | GGGCCATTTGACCTTCTGATTGGTGGGAAGTCCTTGTAATG-----ACTTGTCATGGTGAATCCAGCCAGAAAAGGT   | 3839 |
|                |                                                                                 |      |
| Dnmt3ba (Δ5+6) | GGGCCATTTGACCTTCTGATTGGTGGGAAGTCCTTGTAATGTCATGG-----TCCATGGTGAATCCAGCCAGAAAAGGT | 3840 |
|                | G P F D L L I G G S P C N V M V H G E S S Q K R                                 |      |

|          |                                                                |     |
|----------|----------------------------------------------------------------|-----|
| Dnmt3ba  | MATNVSLEPNNPDDKCSRYEVLGWINETLQTNFTQVEQCRSGACFCQLIDLFLPFGTINLK  | 60  |
| Dnmt3ba1 | MATNVSLEPNNPDDKCSRYEVLGWINETLQTNFTQVEQCRSGACFCQLIDLFLPFGTINLK  | 60  |
| Dnmt3ba  | KVKFESQKRSDFMQNYGLLQAAFRDLEVTEPVPVNELLSGKFRPNFTYLKWFKKFFYANV   | 120 |
| Dnmt3ba  | KVKFESQKRSDFMQNYGLLQAAFRDLEVTEPVPVNELLSGKFRPNFTYLKWFKKFFYANV   | 120 |
| Dnmt3ba  | KQERVYNAFEARDGQEIVPVDDVMKSPKALKSSYESGRAGEESDMEINGGRRSATYDPKW   | 180 |
| Dnmt3ba  | KQERVYNAFEARDGQEIVPVDDVMKSPKALKSSYESGRAGEESDMEINGGRRSATYDPKW   | 180 |
| Dnmt3ba  | QRNLKWIRASDMGDNYAYCTTCDYNIILLAGFHD LKRHQLTQNHMKHETGRTNLPGRKQI  | 240 |
| Dnmt3ba  | QRNLKWIRASDMGDNYAYCTTCDYNIILLAGFHD LKRHQLTQNHMKHETGRTNLPGRKQI  | 240 |
| Dnmt3ba  | EESISCSSETMLLFIQSHCLSSLPSRINRVSQRTARCILGLKYPNDIVSACKLNPYCIYIY  | 300 |
| Dnmt3ba  | EESISCSSETMLLFIQSHCLSSLPSRINRVSQRTARCILGLKYPNDIVSACKLNPYCIYIY  | 300 |
| Dnmt3ba  | GQVPLDVKTGDKTNCHVVLAGFFEEKQARYCIRFLDVFPEDSASSVSGGLFSILKKFEI    | 360 |
| Dnmt3ba  | GQVPLDVKTGDKTNCHVVLAGFFEEKQARYCIRFLDVFPEDSASSVSGGLFSILKKFEI    | 360 |
| Dnmt3ba  | PASN MVAVYINDHELTSES VVSQIRELNPQVIDLGGLYSIPDTACSAGLQTHSVQVQELI | 420 |
| Dnmt3ba  | PASN MVAVYINDHELTSES VVSQIRELNPQVIDLGGLYSIPDTACSAGLQTHSVQVQELI | 420 |
| Dnmt3ba  | ANIYRHFSTGSTSNDNLKMLFAGIDGLKVHSNPLSNSEEFV LVKRIHEMWSDLVS YFSS  | 480 |
| Dnmt3ba  | ANIYRHFSTGSTSNDNLKMLFAGIDGLKVHSNPLSNSEEFV LVKRIHEMWSDLVS YFSS  | 480 |
| Dnmt3ba  | CDENNDNVKQICSQLENPKIRLTLMFLDQALGPLRAFGQHLQ QSKSSVRADLVEILREAS  | 540 |
| Dnmt3ba  | CDENNDNVKQICSQLENPKIRLTLMFLDQALGPLRAFGQHLQ QSKSSVRADLVEILREAS  | 540 |
| Dnmt3ba  | GLLSYASSFLRPQAVIRYLKEQDPAILDNEAFCLPAAELSLGGVLEDFISAREEELADF    | 600 |
| Dnmt3ba  | GLLSYASSFLRPQAVIRYLKEQDPAILDNEAFCLPAAELSLGGVLEDFISAREEELADF    | 600 |
| Dnmt3ba  | LSTFYNECLA IYKTLTTSIAASLPLSDSVLRAISQLLSPAGRLKVTGKNIVDLAVRFGFC  | 660 |
| Dnmt3ba  | LSTFYNECLA IYKTLTTSIAASLPLSDSVLRAISQLLSPAGRLKVTGKNIVDLAVRFGFC  | 660 |
| Dnmt3ba  | SKPEDSAKLNDEFLEYQLAE EENLSSTHSIERYWCTVLKTFPPTSVFKRLVLCLLVLPS P | 720 |
| Dnmt3ba  | SKPEDSAKLNDEFLEYQLAE EENLSSTHSIERYWCTVLKTFPPTSVFKRLVLCLLVLPS P | 720 |
| Dnmt3ba  | SLDATKIFAQAIENG DADQLDDSSSES DTDMTKELDSNDDNSLDNSELQISPIKNGIMKK | 780 |
| Dnmt3ba  | SLDATKIFAQAIENG DADQLDDSSSES DTDMTKELDSNDDNSLDNSELQISPIKNGIMKK | 780 |
| Dnmt3ba  | SRRSTSETVQHSNAVKPCVVRLEKITSQREVNLKNDGAKNDGTLTSNTLKEVKNDLSNST   | 840 |
| Dnmt3ba  | SRRSTSETVQHSNAVKPCVVRLEKITSQREVNLKNDGAKNDGTLTSNTLKEVKNDLSNST   | 840 |

|         |                                                                      |      |
|---------|----------------------------------------------------------------------|------|
| Dnmt3ba | PSPRRGKRDQAYNDGKGFAVGELVWGKVKDFSLWPGLVVPWKGRIVPVSMRRVEWFGDGM         | 900  |
| Dnmt3ba | PSPRRGKRDQAYNDGKGFAVGELVWGKVKDFSLWPGLVVPWKGRIVPVSMRRVEWFGDGM         | 900  |
| Dnmt3ba | FSEIHTDGLLPFGAFSKNFCSKSYEGLPTYKNAIYQILELAAERSGKLFPPSEKKGEEVK         | 960  |
| Dnmt3ba | FSEIHTDGLLPFGAFSKNFCSKSYEGLPTYKNAIYQILELAAERSGKLFPPSEKKGEEVK         | 960  |
| Dnmt3ba | AMMDWAFGGFQPMGADGFLPSADSSASNKTESDSSVSDYQPPAKRKYVFKNRPSTQECNR         | 1020 |
| Dnmt3ba | AMMDWAFGGFQPMGADGFLPSADSSASNKTESDSSVSDYQPPAKRKYVFKNRPSTQECNR         | 1020 |
| Dnmt3ba | DQMVQEVTSKGRKIEDFCLSCGSSNTEIFHPLFKGSLCIKCKENFTETLYRYDDDGYQSY         | 1080 |
| Dnmt3ba | DQMVQEVTSKGRKIEDFCLSCGSSNTEIFHPLFKGSLCIKCKENFTETLYRYDDDGYQSY         | 1080 |
| Dnmt3ba | CTVCCAGLEVILCGNASCCRCFCCKDCLNVLVGPFTDKLKEVDPWSCYVCLPSKCYGVLK         | 1140 |
| Dnmt3ba | CTVCCAGLEVILCGNASCCRCFCCKDCLNVLVGPFTDKLKEVDPWSCYVCLPSKCYGVLK         | 1140 |
| Dnmt3ba | LRTDWSVRVQEFFANNSAFEFEPHRVYPSIPAHKRRPIRVLSLFDGIATGYLVLKDLGFK         | 1200 |
| Dnmt3ba | LRTDWSVRVQEFFANNSAFEFEPHRVYPSIPAHKRRPIRVLSLFDGIATGYLVLKDLGFK         | 1200 |
| Dnmt3ba | LERYIASEICEDSIAVGMVKHEGKIEYVKDVRTITRKHLAEWGPFDLLIGGSPCNDLSMV         | 1260 |
| Dnmt3ba | LERYIASEICEDSIAVGMVKHEGKIEYVKDVRTITRKHLAEWGPFDLLIGGSPC <i>NVMVHG</i> | 1260 |
| Dnmt3ba | NPARKGLFEGTGRLFFEYYRMLTMMRPKEDDDRPFWLFENVVAMSAHDKADICRFLECN          |      |
| Dnmt3ba | <i>ESSQKRSF</i> * 1268                                               |      |
|         | EGTGRLFFEYYRMLTMMRPKEDDDRPFWLFENVVAMSAHDKADICRFLECNPVMIDAVK          |      |
|         | VSPAVSPAHRARYFWGNLPGMNRPVATSLTDNVDLQDCLESGRTAMFSKVRTITTKSNSI         |      |
|         | KQGKTGPLPVTMNGKEDYLWCTEMEKIFGFPKHYTDVNNMGRGQRQKVLGRSWSVPVIRH         |      |
|         | LFAPLKDYFACE*                                                        |      |
