# Supplementary figures and images for: TEADs, Yap, Taz, Vgll4s transcription factors control the establishment of Left-Right asymmetry in zebrafish
Source: eLife journal article supplement (doi:10.7554/elife.45241), 2019-09-12

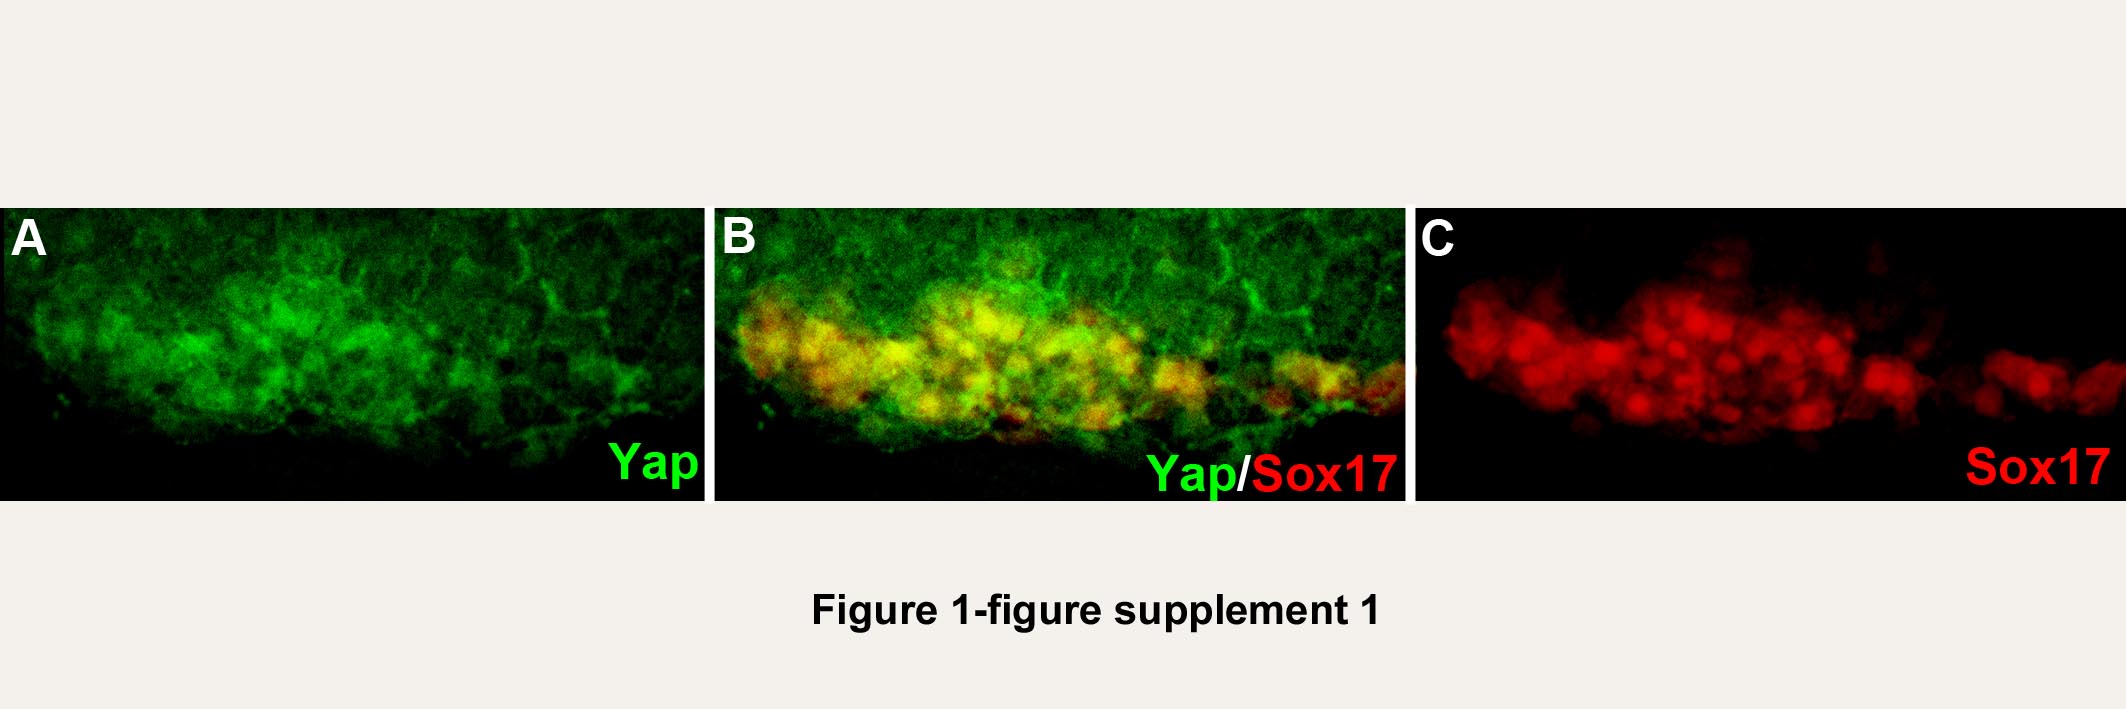

Supplement: supp [file elife-45241-supp-v1.zip › elife_poa_e45241_Figure_1_figure_supplement_1.jpg]

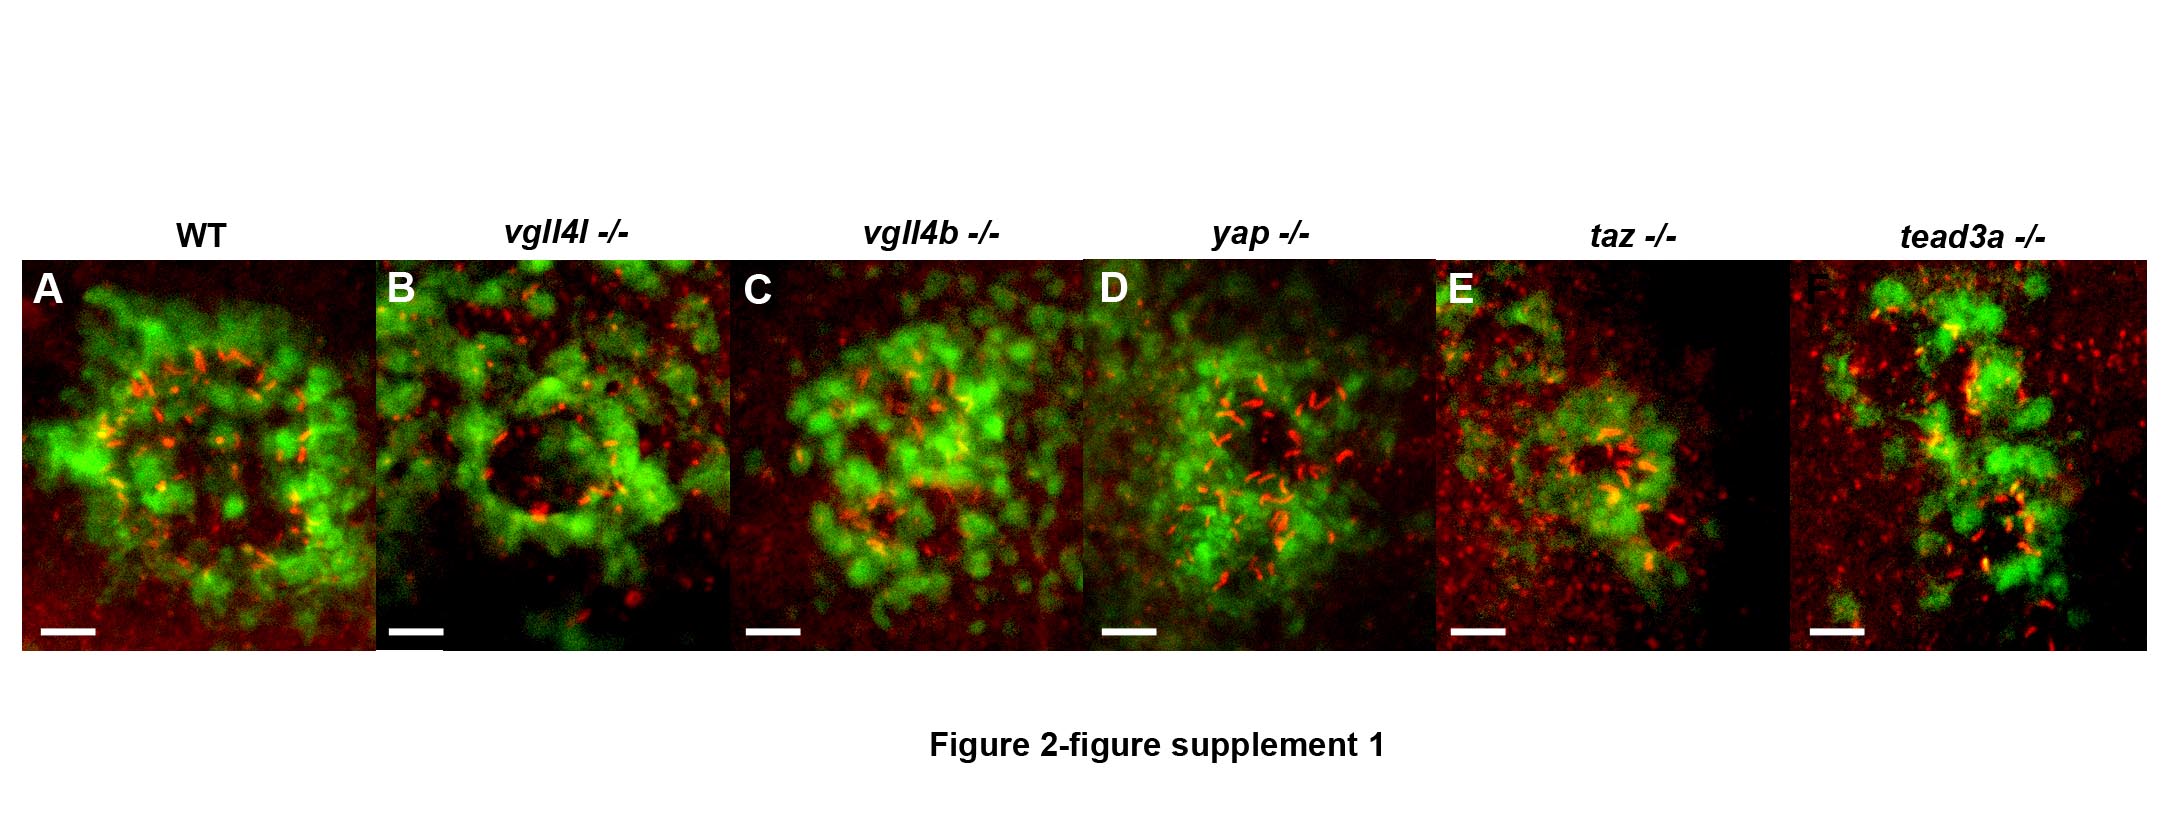

Supplement: supp [file elife-45241-supp-v1.zip › elife_poa_e45241_Figure_2_figure_supplement_1.jpg]

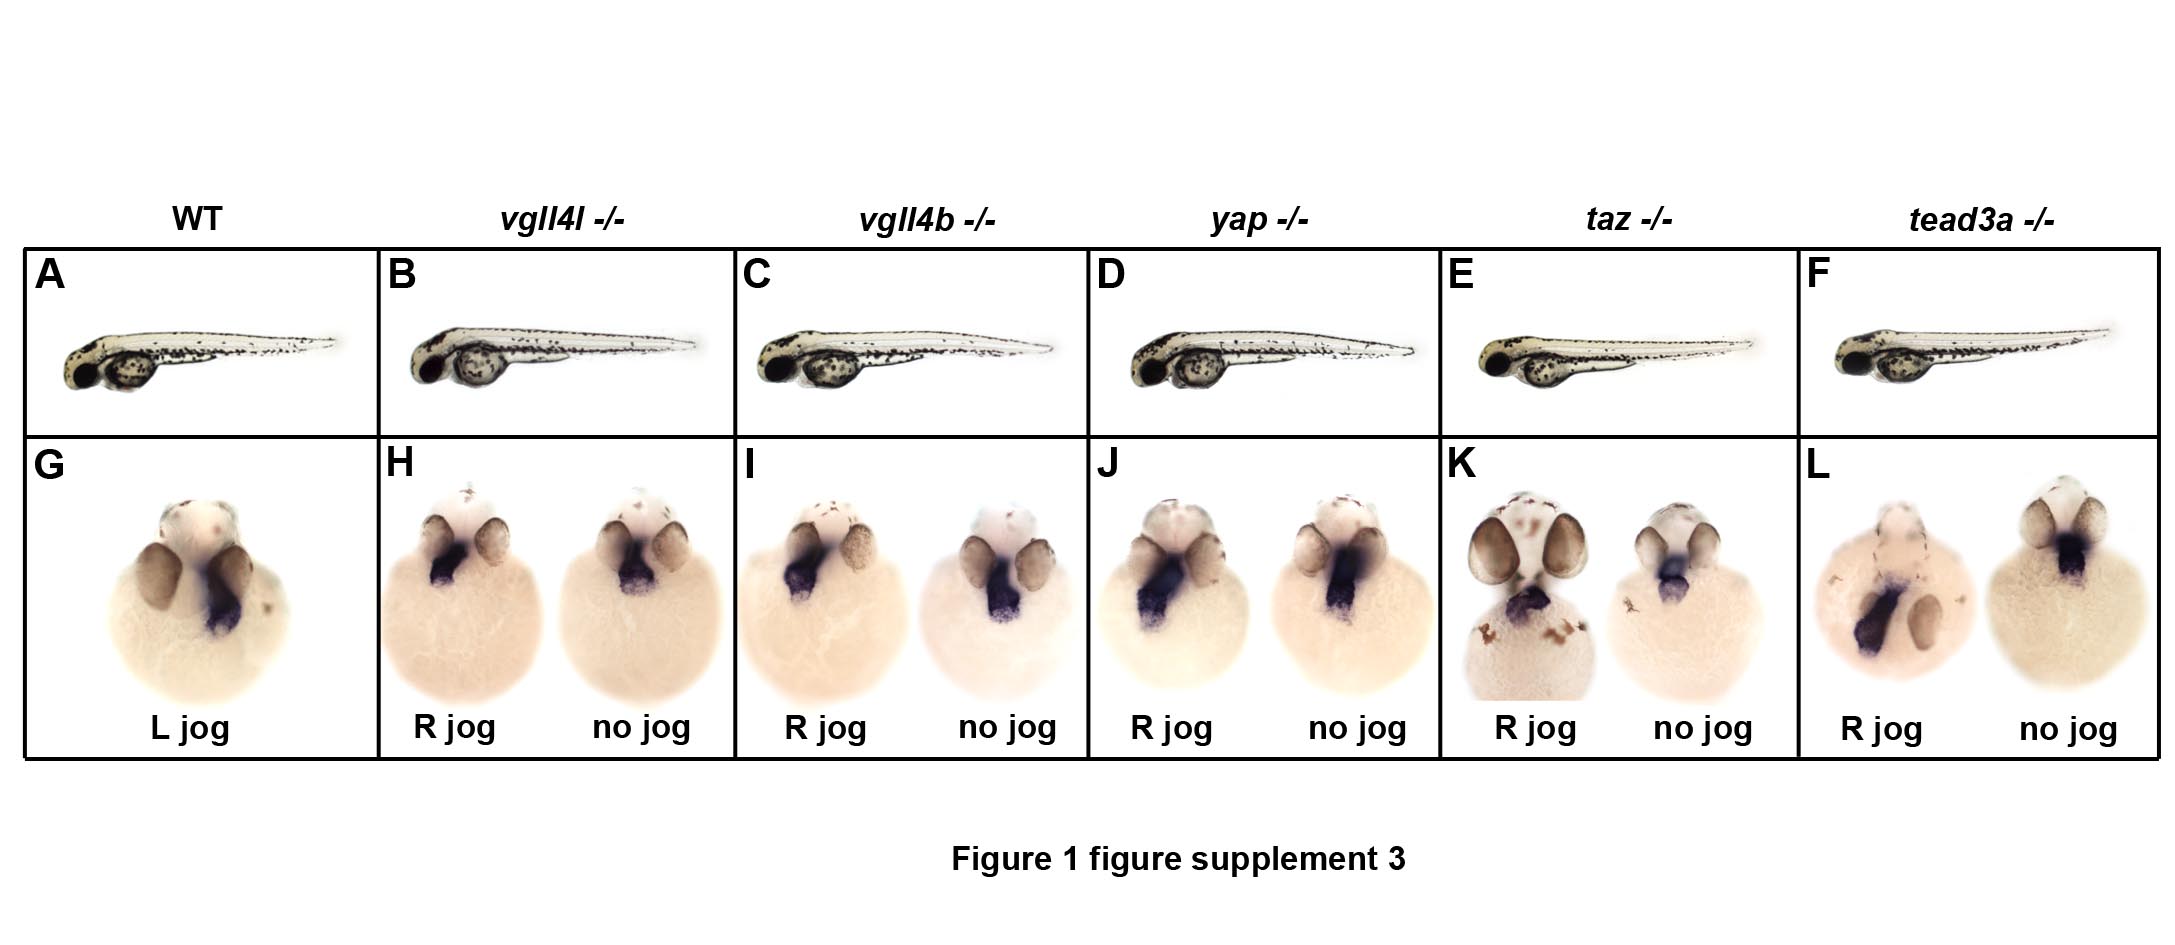

Supplement: supp [file elife-45241-supp-v1.zip › elife_poa_e45241_Figure_1_figure_supplement_3.jpg]

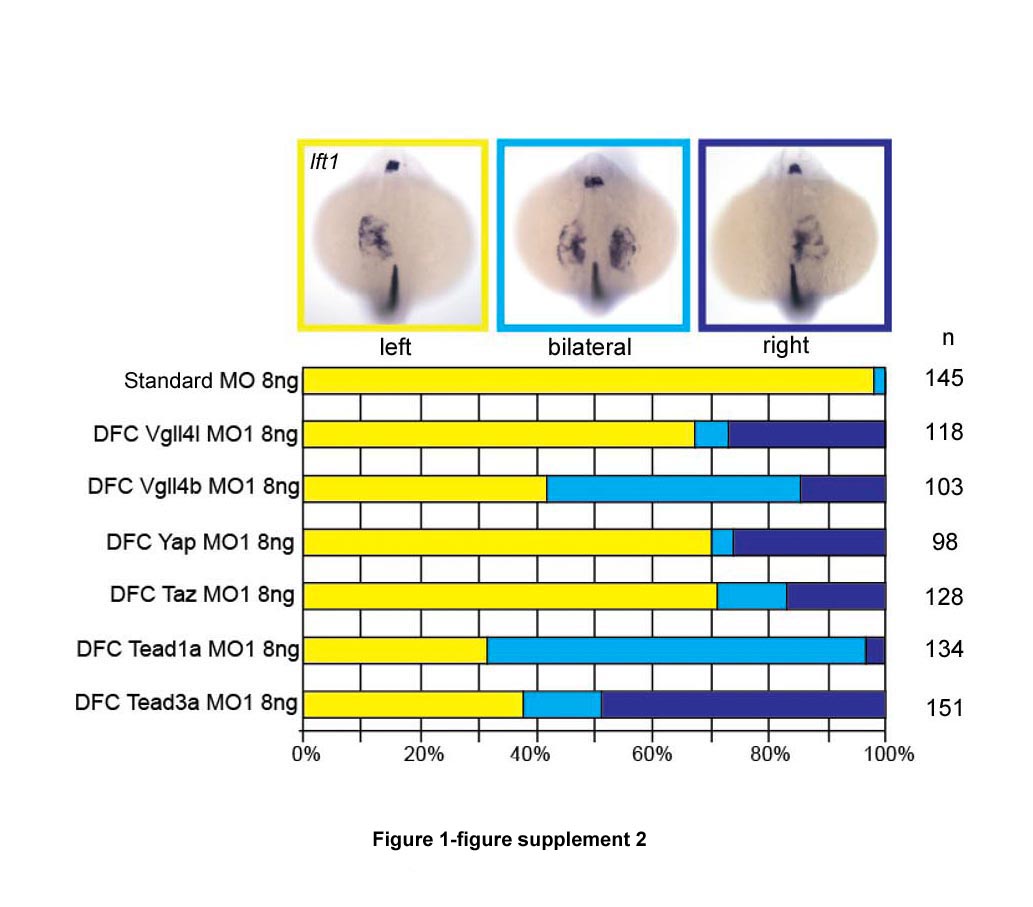

Supplement: supp [file elife-45241-supp-v1.zip › elife_poa_e45241_Figure_1_figure_supplement_2.jpg]

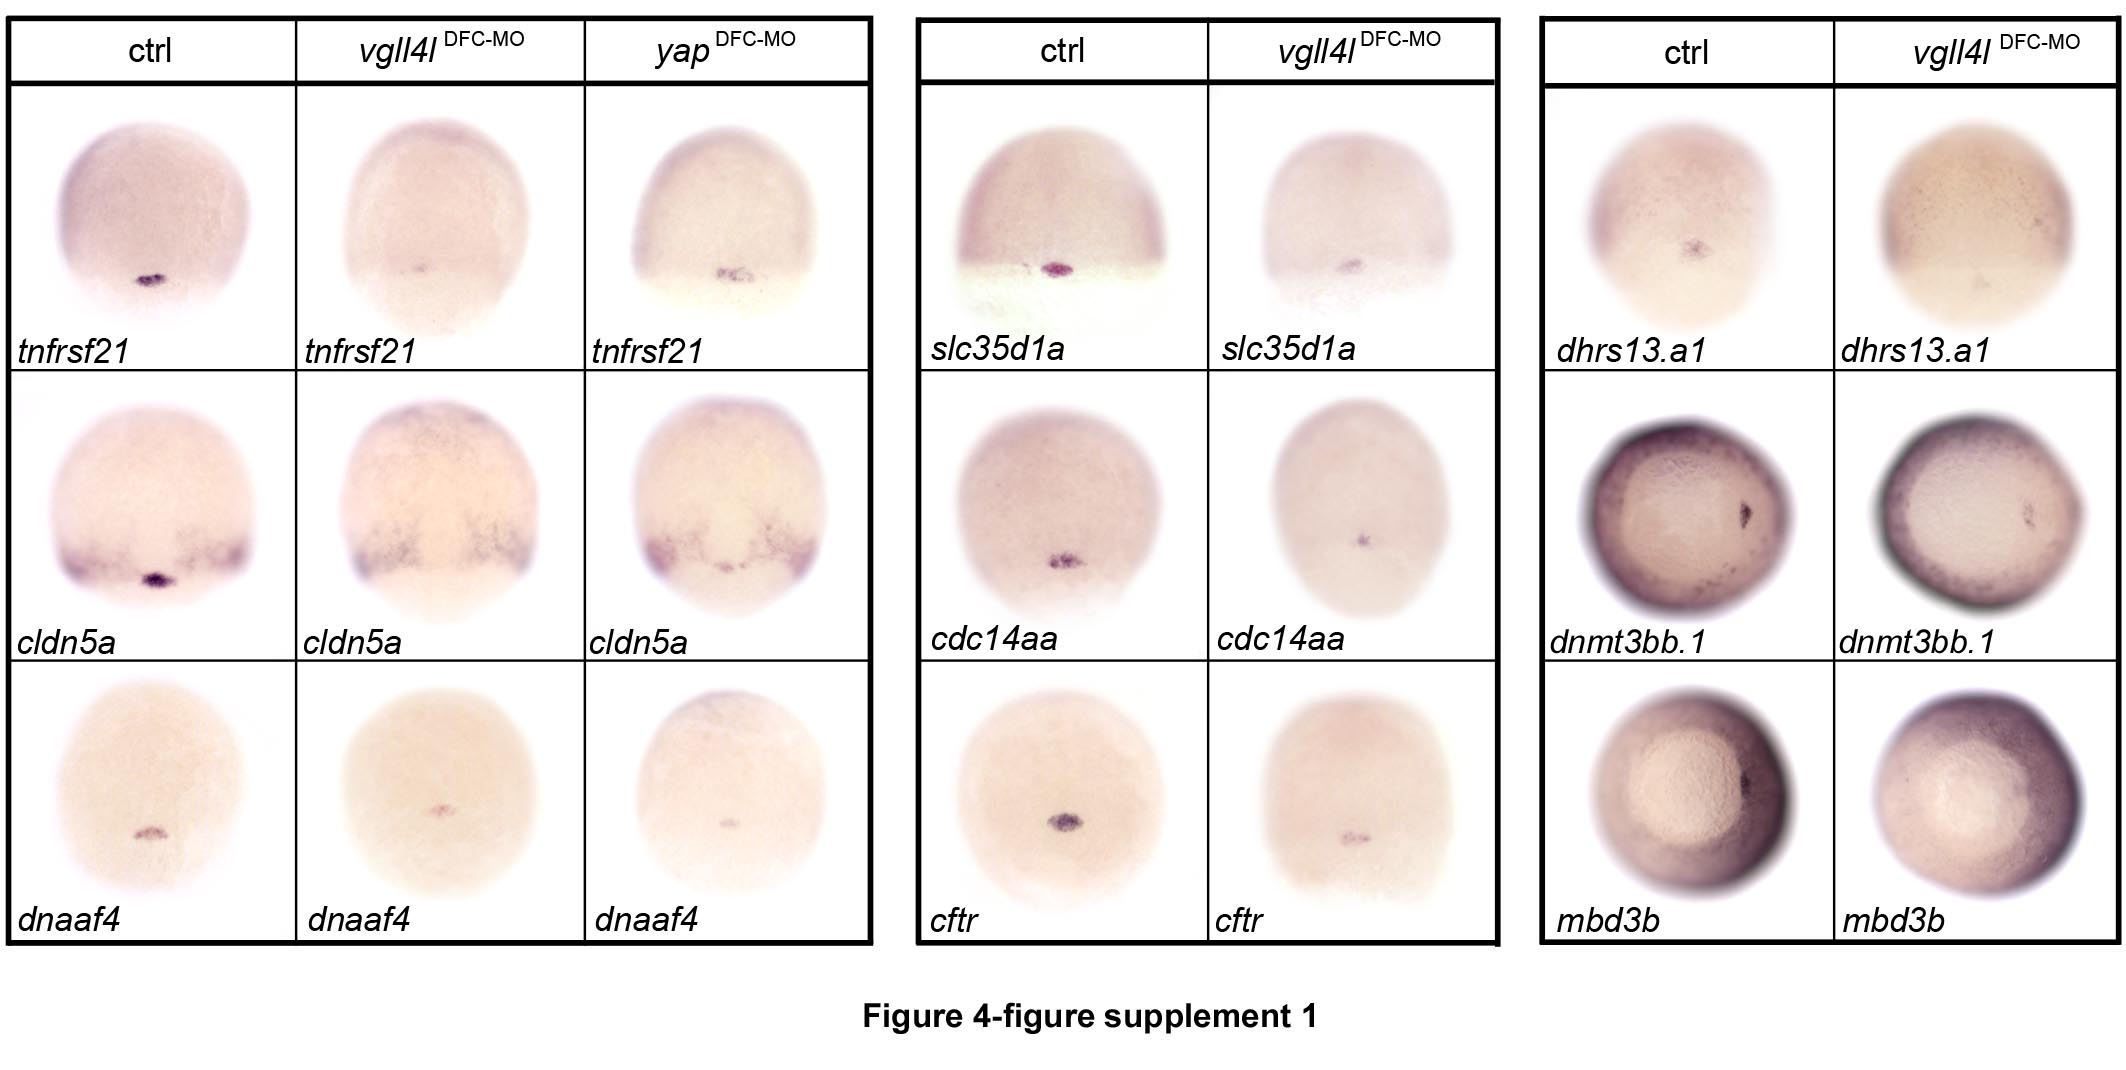

Supplement: supp [file elife-45241-supp-v1.zip › elife_poa_e45241_Figure_4_figure_supplement_1.jpg]

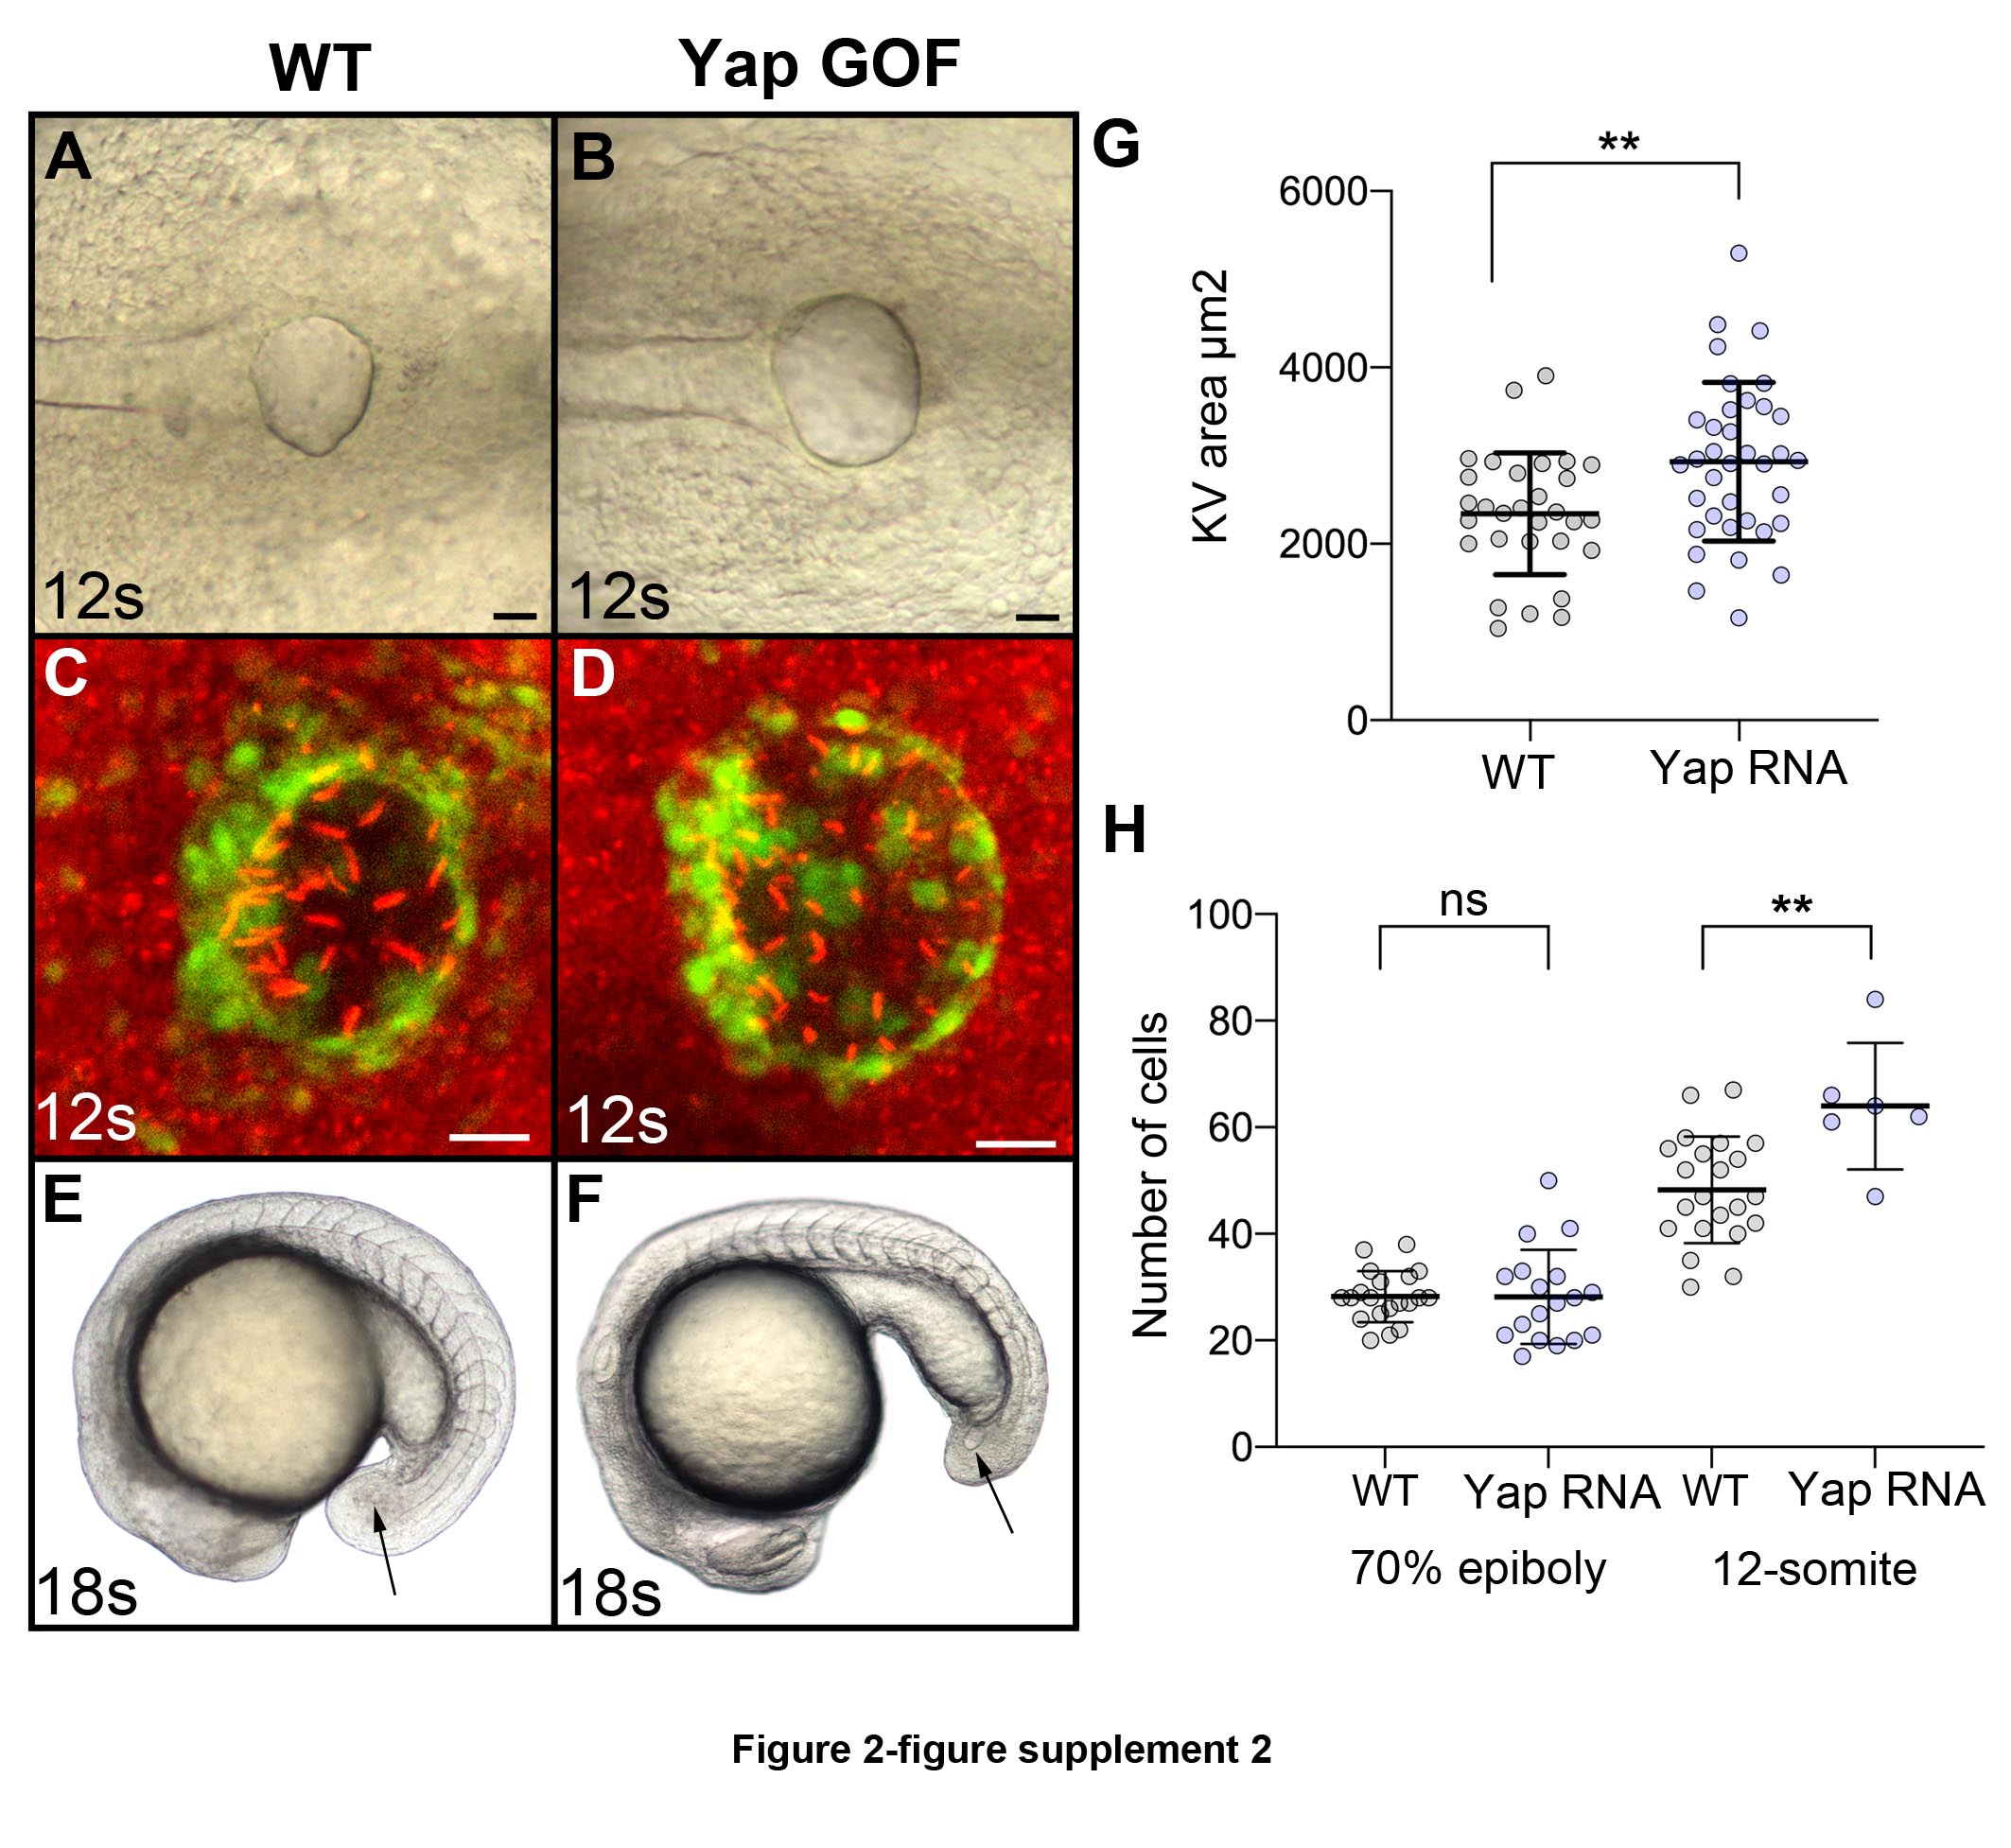

Supplement: supp [file elife-45241-supp-v1.zip › elife_poa_e45241_Figure_2_figure_supplement_2.jpg]

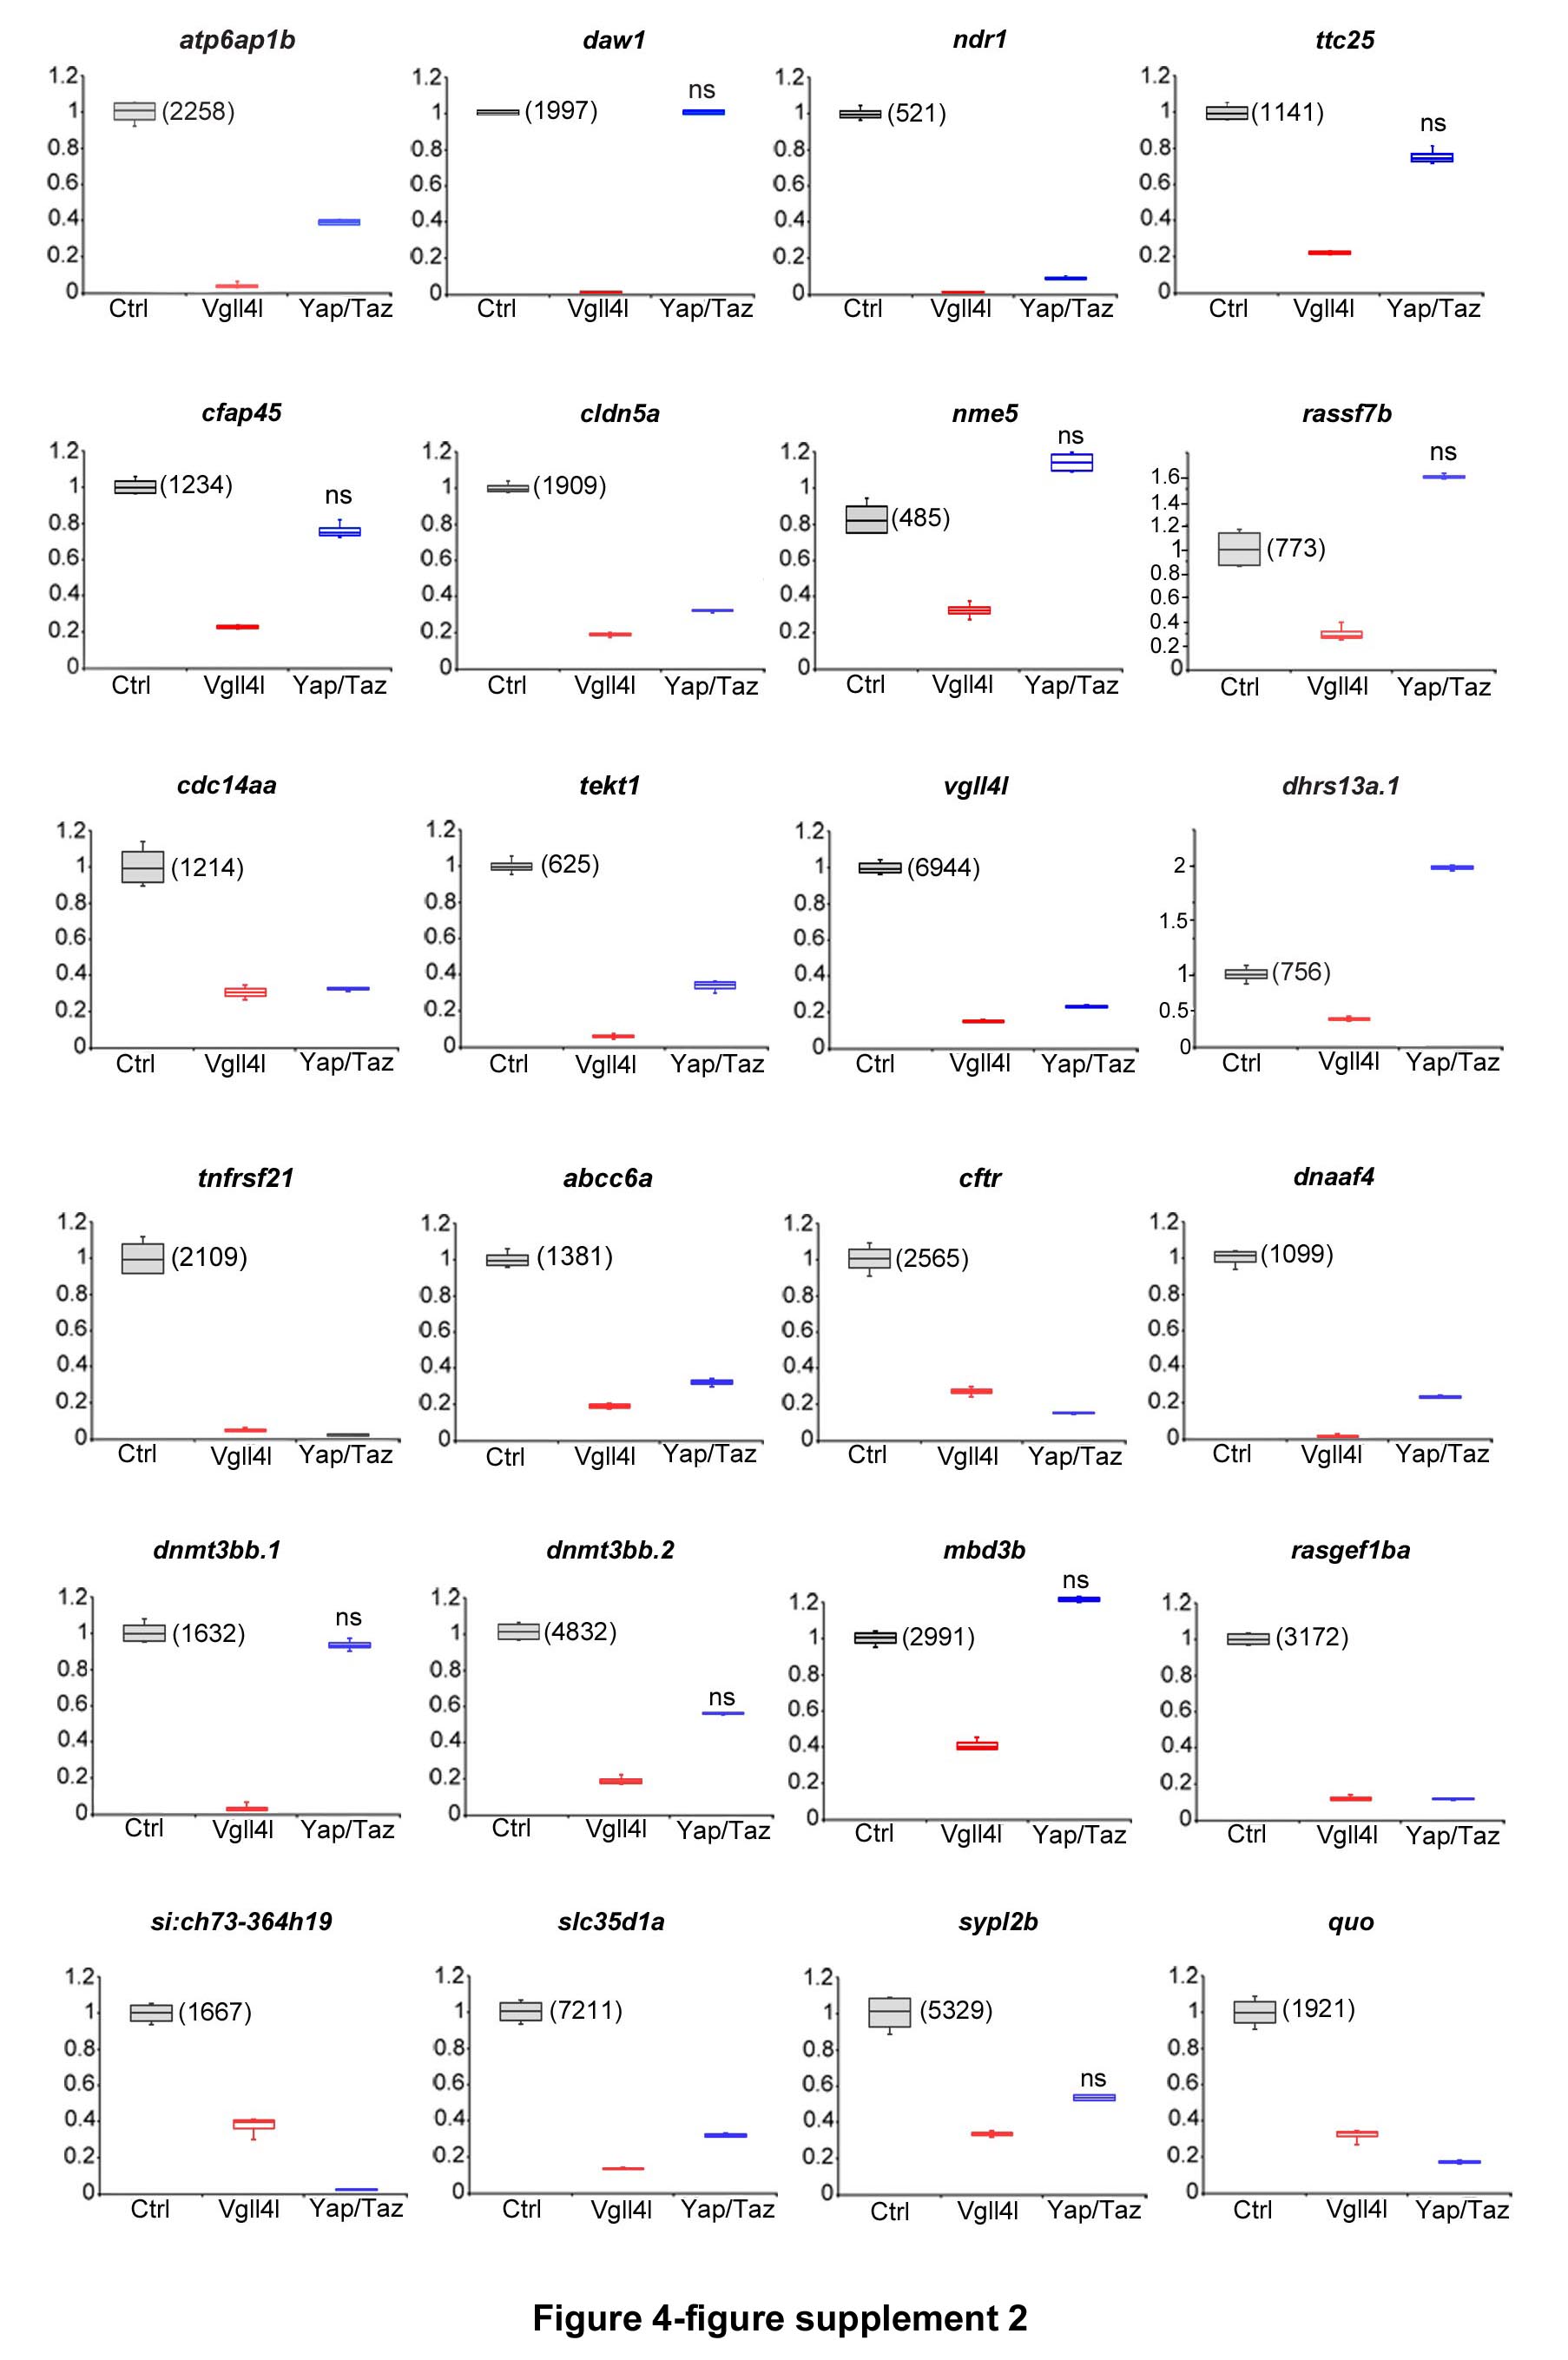

Supplement: supp [file elife-45241-supp-v1.zip › elife_poa_e45241_Figure_4_figure_supplement_2.jpg]
